# Supplementary material for: Native carboxyl group-assisted C–H acetoxylation of hydrocinnamic and phenylacetic acids
Source: Royal Society of Chemistry journal article supplement (doi:10.1039/d2cc00459c), 2022-01-01

# Supplementary Information

*for*

## Native carboxyl group assisted C–H acetoxylation of hydrocinnamic and phenylacetic acids

Xinchao Wang,<sup>ab</sup> Hang Wang,<sup>b</sup> Chunlin Zhou,<sup>b</sup> Lei Yang,<sup>b</sup> Lei Fu,<sup>b</sup> and Gang Li<sup>\*bc</sup>

<sup>a</sup>College of Chemistry and Materials Science, Fujian Normal University, Fuzhou 350117, China

<sup>b</sup>Key Laboratory of Coal to Ethylene Glycol and Its Related Technology, Fujian Institute of Research on the Structure of Matter, Fuzhou, Fujian 350002, China

<sup>c</sup>Frontiers Science Center for Transformative Molecules, School of Chemistry and Chemical Engineering, Shanghai Jiao Tong University, Shanghai 200240, China

\*Email: [gangli@fjirsm.ac.cn](mailto:gangli@fjirsm.ac.cn):

## Table of Contents

|                                                                         |     |
|-------------------------------------------------------------------------|-----|
| 1. General Information.....                                             | S2  |
| 2. Experimental Section.....                                            | S2  |
| 2.1 Optimization of reaction conditions substrate 1a <sup>a</sup> ..... | S2  |
| 2.2 Optimization of reaction conditions substrate 3a <sup>a</sup> ..... | S4  |
| 2.3 General procedures for synthesis of substrates.....                 | S5  |
| 2.4 General procedures for synthesis of substrate 5.....                | S5  |
| 2.5 General procedures for synthesis of products.....                   | S6  |
| General procedure A.....                                                | S6  |
| General procedure B.....                                                | S6  |
| General procedure C.....                                                | S7  |
| General procedure D.....                                                | S7  |
| 2.6 Mechanistic studies.....                                            | S29 |
| 3. References.....                                                      | S30 |
| 4. NMR Spectre of Compounds.....                                        | S31 |

# 1. General Information

Unless otherwise noted, commercially available reagents were purchased from commercial suppliers (such as Strem, Alfa Aesar, J&K Chemical Co, Energy Chemical, Sinocompound and Adamas) and used as received. Solvents were generally dried over 4 Å molecular sieves. Hexafluoroisopropanol (HFIP) was dried over 4 Å molecular sieves and distilled before use. The reaction vessels used for C–H functionalization were 15 mL sealed tube or 50 mL Schlenk tube (Synthware). Purification of products was performed by flash chromatography (FC) using silica gel or preparative thin layer chromatography.  $^1\text{H}$  and  $^{13}\text{C}$  NMR spectra were recorded on a Bruker AVANCE III spectrometer (400 MHz and 101 MHz, respectively). Chemical shifts are reported parts per million (ppm) referenced to  $\text{CDCl}_3$  ( $\delta$  7.26 ppm) or MeOD ( $\delta$  3.10 ppm) or  $(\text{CD}_3)_2\text{CO}$  ( $\delta$  2.05 ppm), tetramethylsilane (TMS,  $\delta$  0.00 ppm) for  $^1\text{H}$  NMR;  $\text{CDCl}_3$  ( $\delta$  77.16 ppm) or MeOD ( $\delta$  49.00 ppm) or  $(\text{CD}_3)_2\text{CO}$  ( $\delta$  29.84 ppm, 206.26 ppm) for  $^{13}\text{C}$  NMR. The following abbreviations (or combinations thereof) were used to explain multiplicities: s = singlet, d = doublet, t = triplet, q = quartet, hept = heptaplet, m = multiplet, and br = broad. To distinguish, some  $^{13}\text{C}$  NMR chemical shifts retain two decimal places. High-resolution mass spectra (HRMS) were obtained on an Impact II UHR-TOF mass spectrometry equipped with an ESI source from Bruker at Fujian Institute of Research on the Structure of Matter.

## 2. Experimental Section

### 2.1 Optimization of reaction conditions substrate **1a**<sup>a</sup>

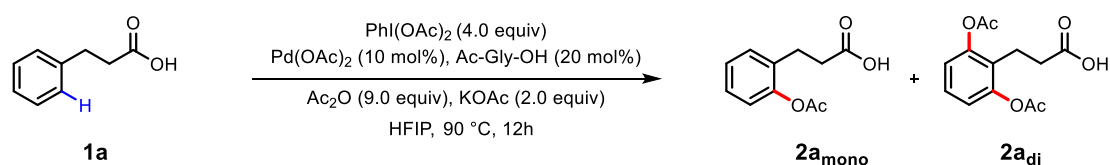

| Entry | Deviation from standard conditions     | Yield(%) <b>(mono/di)</b> |
|-------|----------------------------------------|---------------------------|
| 1     | None                                   | 72 [50, 22]               |
| 2     | $\text{Ac}_2\text{O}$ (0 equiv)        | 47 [19, 28]               |
| 3     | $\text{Ac}_2\text{O}$ (3.0 equiv)      | 60 [33, 27]               |
| 4     | $\text{Ac}_2\text{O}$ (6.0 equiv)      | 64 [43, 21]               |
| 5     | $\text{Ac}_2\text{O}$ (12.0 equiv)     | 62 [48, 14]               |
| 6     | $\text{PhI}(\text{OAc})_2$ (1.0 equiv) | 45 [38, 7]                |
| 7     | $\text{PhI}(\text{OAc})_2$ (2.0 equiv) | 57 [43, 14]               |
| 8     | $\text{PhI}(\text{OAc})_2$ (3.0 equiv) | 63 [42, 21]               |

|    |                                                      |             |
|----|------------------------------------------------------|-------------|
| 9  | PhI(OAc) <sub>2</sub> (5.0 equiv)                    | 66 [52, 14] |
| 10 | KOPiv instead of KOAc                                | 60 [46, 14] |
| 11 | LiOAc instead of KOAc                                | 22 [22, 0]  |
| 12 | NaOAc instead of KOAc                                | 55 [48, 7]  |
| 13 | CsOAc instead of KOAc                                | 55 [41, 14] |
| 14 | K <sub>2</sub> CO <sub>3</sub> instead of KOAc       | 60 [44, 16] |
| 15 | Without KOAc                                         | 12 [12, 0]  |
| 16 | 2-Hydroxy-5-bromopyridine instead of Ac-Gly-OH       | 16 [16, 0]  |
| 17 | 3-nitropyridin-2-ol instead of Ac-Gly-OH             | 46 [39, 7]  |
| 18 | 2-bromo-3-methylpyridine instead of Ac-Gly-OH        | 35 [35, 0]  |
| 19 | Fmoc-Gly-OH instead of Ac-Gly-OH                     | 61 [51, 10] |
| 20 | Ac-DL-Phe-OH instead of Ac-Gly-OH                    | 62 [53, 9]  |
| 21 | Fmoc-L-Phe-OH instead of Ac-Gly-OH                   | 56 [49, 7]  |
| 22 | Fmoc-L-Ile-OH instead of Ac-Gly-OH                   | 62 [51, 11] |
| 23 | Without Ac-Gly-OH                                    | 57 [44, 13] |
| 24 | Pd(OAc) <sub>2</sub> (5 mol%)<br>Ac-Gly-OH (10 mol%) | 43 [34, 9]  |
| 25 | Pd(OAc) <sub>2</sub> (5 mol%)                        | 48 [36, 12] |
| 26 | HFIP 4 mL                                            | 69 [33, 36] |
| 27 | TFE as solvent                                       | 23 [23, 0]  |
| 28 | <i>t</i> -BuOH as solvent                            | N.D.        |
| 29 | 1,4-dioxane as solvent                               | N.D.        |
| 30 | MeCN as solvent                                      | N.D.        |
| 31 | AcOH as solvent                                      | 5 [5, 0]    |
| 32 | 70 °C                                                | 30 [30, 0]  |
| 33 | 80 °C                                                | 33 [28, 5]  |
| 34 | 100 °C                                               | 59 [46, 13] |
| 35 | 18 h                                                 | 64 [44, 20] |
| 36 | 24 h                                                 | 60 [42, 18] |

<sup>a</sup> Reaction conditions: **1a** (0.2 mmol), Pd(OAc)<sub>2</sub> (10 mol %), Ac-Gly-OH (20 mol%), PhI(OAc)<sub>2</sub> (4.0 equiv), Ac<sub>2</sub>O (9.0 equiv), HFIP (2 mL), 12 h, 90 °C. Yield was determined by <sup>1</sup>H NMR with CH<sub>2</sub>Br<sub>2</sub> as internal standard.

## 2.2 Optimization of reaction conditions substrate **3a**<sup>a</sup>

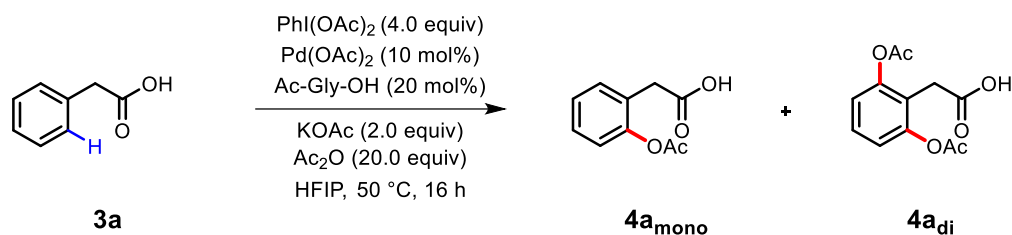

| Entry | Deviation from standard conditions                                     | Yield(%) <b>(mono/di)</b> |
|-------|------------------------------------------------------------------------|---------------------------|
| 1     | None                                                                   | 76 [55, 21]               |
| 2     | $\text{Ac}_2\text{O}$ (0 equiv)                                        | 29 [0, 29]                |
| 3     | $\text{Ac}_2\text{O}$ (5.0 equiv)                                      | 42 [0, 42]                |
| 4     | $\text{Ac}_2\text{O}$ (10.0 equiv)                                     | 60 [15, 45]               |
| 5     | $\text{Ac}_2\text{O}$ (15.0 equiv)                                     | 68 [36, 32]               |
| 6     | $\text{Ac}_2\text{O}$ (25.0 equiv)                                     | 71 [55, 16]               |
| 7     | $\text{PhI(OAc)}_2$ (2.0 equiv)                                        | 66 [38, 28]               |
| 8     | $\text{PhI(OAc)}_2$ (3.0 equiv)                                        | 68 [42, 26]               |
| 9     | $\text{PhI(OAc)}_2$ (5.0 equiv)                                        | 74 [52, 22]               |
| 10    | $\text{PhI(OAc)}_2$ (2.0 equiv);<br>$\text{Ac}_2\text{O}$ (10.0 equiv) | 46 [3, 43]                |
| 11    | $\text{PhI(OAc)}_2$ (2.0 equiv);<br>$\text{Ac}_2\text{O}$ (15.0 equiv) | 48 [15, 33]               |
| 12    | $\text{PhI(OAc)}_2$ (3.0 equiv);<br>$\text{Ac}_2\text{O}$ (10.0 equiv) | 50 [9, 41]                |
| 13    | $\text{PhI(OAc)}_2$ (3.0 equiv);<br>$\text{Ac}_2\text{O}$ (15.0 equiv) | 62 [27, 35]               |
| 14    | LiOAc instead of KOAc                                                  | 34 [34, 0]                |
| 15    | NaOAc instead of KOAc                                                  | 52 [41, 11]               |
| 16    | CsOAc instead of KOAc                                                  | 60 [44, 16]               |

<sup>a</sup> Reaction conditions: **3a** (0.2 mmol),  $\text{Pd(OAc)}_2$  (10 mol %),  $\text{Ac-Gly-OH}$  (20 mol%),  $\text{PhI(OAc)}_2$  (4.0 equiv),  $\text{Ac}_2\text{O}$  (20.0 equiv), HFIP (2 mL), 16 h, 50 °C. Yield was determined by <sup>1</sup>H NMR with  $\text{CH}_2\text{Br}_2$  as internal standard.



## 2.3 General procedures for synthesis of substrates

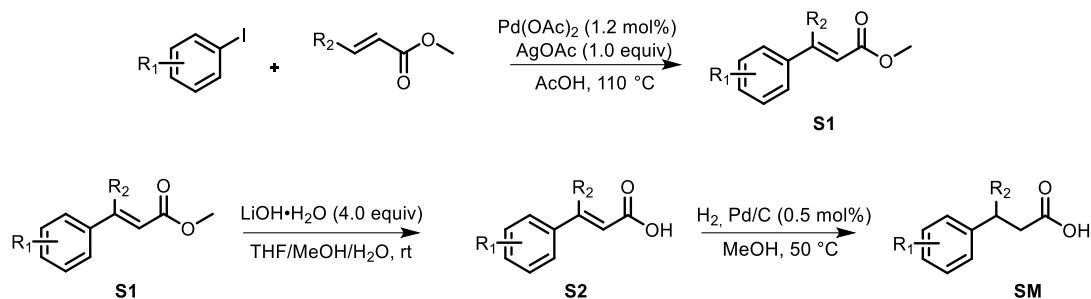

To a stirred solution of silver acetate (5 mmol) and palladium acetate (0.06 mmol) in acetic acid (10 mL) was added iodobenzene (5 mmol) and ethyl acrylate (6 mmol). The resulting mixture was stirred at 110 °C for 6~12 h<sup>[S1]</sup>. After being cooled to room temperature, the reaction mixture was diluted with 15 mL ethyl acetate. The reaction mixture was filtered over a pad of celite, and concentrated under reduced pressure to give the product **S1**. **S1** was then dissolved in a solution of THF (15 mL), EtOH (10 mL) and H<sub>2</sub>O (5 mL). The solution was cooled to 0 °C and LiOH H<sub>2</sub>O (4.0 equiv) was added. The mixture was stirred at room temperature for 2 h and then H<sub>2</sub>O (10 mL) was added. The solution was extracted with Et<sub>2</sub>O (20 mL × 2) and the aqueous phase was acidized with 2N HCl (20 mL). The aqueous phase was extracted with DCM (10 mL × 4). The combined organic phase was dried over anhydrous Na<sub>2</sub>SO<sub>4</sub> and concentrated under reduced pressure to give compound **S2**. A mixture of **S2** and 60.0 mg of Pd/C (10%) was placed in flask under nitrogen before methanol (30 ml) was carefully added. The resulting suspension was evacuated and then refilled with hydrogen and equipped with a hydrogen balloon, and the reaction mixture was vigorously stirred at room temperature for 4h. The solvent was removed under reduced pressure and the residue was purified by flash silica gel column chromatography with petroleum ether (PE)/EtOAc (EA) (3/1) to give compound hydrocinnamic acids.

## 2.4 General procedures for synthesis of substrate 5

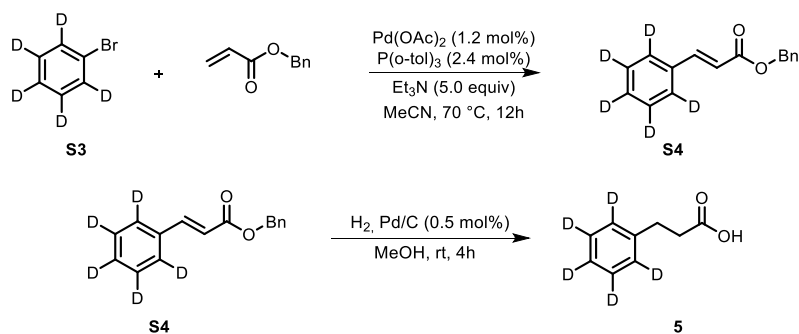

Pd(OAc)<sub>2</sub> (13.5 mg, 0.06 mmol), tri(o-tol)phosphine (36.5 mg, 0.12 mmol) and Et<sub>3</sub>N (1.4 mL, 10 mmol) were added to a solution of **S3** (0.21 mL, 2.0 mmol) and benzyl acrylate (0.33 mL, 2.2 mmol) in anhydrous MeCN (10.0 mL). The mixture was stirred at 80 °C for 12 h and then cooled to room

temperature. H<sub>2</sub>O (10 mL) was added and the aqueous phase was extracted with EA (5 mL × 3). The combined organic phase was dried over anhydrous Na<sub>2</sub>SO<sub>4</sub> and evaporated under reduced pressure. The residue was purified by flash silica gel chromatography with PE/EA (3/1) to afford **S4**. A mixture of **S4** and 10% palladium over activated charcoal (24.0 mg) was placed under nitrogen before methanol (10 ml) was carefully added. The resulting suspension was placed under vacuum, then under hydrogen (1 atm), and the reaction mixture was vigorously stirred at room temperature for 4h. The solvent was removed under reduced pressure and the residue was purified by flash silica gel column chromatography with petroleum ether (PE)/EtOAc (EA) (3/1) to give compound **5**.

## 2.5 General procedures for synthesis of products

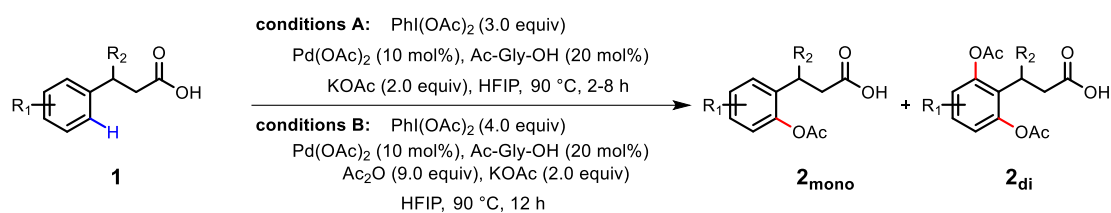

### General procedure A

An oven-dried 15 mL sealed tube (with a Teflon cap) equipped with a magnetic stir bar was charged with compound **1a** (30.0 mg, 0.2 mmol, 1.0 equiv), PhI(OAc)<sub>2</sub> (193 mg, 0.6 mmol, 3.0 equiv), Pd(OAc)<sub>2</sub> (4.6 mg, 0.02 mmol, 10 mol %), ligand (Ac-Gly-OH, 4.7 mg 0.04 mmol, 20 mol %), KOAc (39.2 mg 0.4 mmol, 2.0 equiv) sequentially. HFIP (2.0 mL) was added to the mixture along the inside wall of the tube. The tube was then capped and placed into a preheated oil bath (90 °C) or hotplate (90 °C). [Note: good stirring was important for reproducibility, splashes on the wall of the tube showed adverse effects for the reaction]. The reaction vessel was then cooled to room temperature. Then a 3 N HCl solution (2 mL) was added, and the mixture was extracted with DCM (3 × 5 mL). The organic layers were combined and removed under reduced pressure. The resulting residue was purified by preparative TLC using PE/EA (4/1, with 1% HOAc) as the eluent.

### General procedure B

An oven-dried 15 mL sealed tube (with a Teflon cap) equipped with a magnetic stir bar was charged with compound **1a** (30.0 mg, 0.2 mmol, 1.0 equiv), PhI(OAc)<sub>2</sub> (257 mg, 0.8 mmol, 4.0 equiv), Pd(OAc)<sub>2</sub> (4.6 mg, 0.02 mmol, 10 mol %), ligand (Ac-Gly-OH, 4.7 mg 0.04 mmol, 20 mol %), KOAc (39.2 mg 0.4 mmol, 2.0 equiv) and Ac<sub>2</sub>O (0.172 mL 9 equiv) sequentially. HFIP (2.0 mL) was added to the mixture along the inside wall of the tube. The tube was then capped and placed into a preheated oil bath (90 °C) or hotplate (90 °C). [Note: good stirring was important for reproducibility, splashes on the wall of the tube showed adverse effects for the reaction]. The reaction vessel was then cooled to room temperature. Then a 3 N HCl solution (2 mL) was added, and the mixture was extracted with DCM (3 × 5 mL). The organic layers were combined and removed under reduced pressure. The resulting residue was purified by preparative TLC using PE/EA (4/1, with 1% HOAc) as the eluent.

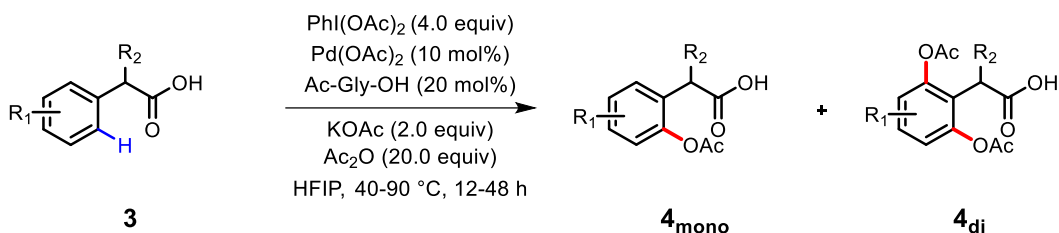

### General procedure C

An oven-dried 15 mL sealed tube (with a Teflon cap) equipped with a magnetic stir bar was charged with compound **3a** (27.6 mg, 0.2 mmol, 1.0 equiv),  $\text{PhI(OAc)}_2$  (257 mg, 0.8 mmol, 4.0 equiv),  $\text{Pd(OAc)}_2$  (4.6 mg, 0.02 mmol, 10 mol %), ligand ( $\text{Ac-Gly-OH}$ , 4.7 mg 0.04 mmol, 20 mol %),  $\text{KOAc}$  (39.2 mg 0.4 mmol, 2.0 equiv) and  $\text{Ac}_2\text{O}$  (0.382 mL 20 equiv) sequentially. HFIP (2.0 mL) was added to the mixture along the inside wall of the tube. The tube was then capped and placed into a preheated oil bath (40- 90 °C) or hotplate (40- 90 °C). [Note: good stirring was important for reproducibility, splashes on the wall of the tube showed adverse effects for the reaction]. The reaction vessel was then cooled to room temperature. Then a 3 N HCl solution (2 mL) was added, and the mixture was extracted with DCM (3 × 5 mL). The organic layers were combined and removed under reduced pressure. The resulting residue was purified by preparative TLC using PE/EA (3/1, with 1% HOAc) as the eluent.

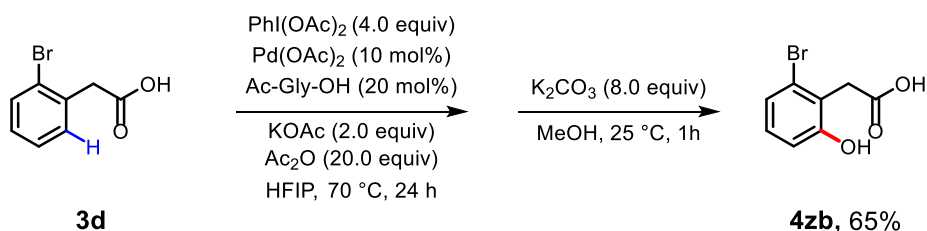

### General procedure D

An oven-dried 15 mL sealed tube (with a Teflon cap) equipped with a magnetic stir bar was charged with compound **3d** (43.0 mg, 0.2 mmol, 1.0 equiv),  $\text{PhI(OAc)}_2$  diacetate (257 mg, 0.8 mmol, 4.0 equiv),  $\text{Pd(OAc)}_2$  (4.6 mg, 0.02 mmol, 10 mol %), ligand ( $\text{Ac-Gly-OH}$ , 4.7 mg 0.04 mmol, 20 mol %),  $\text{KOAc}$  (39.2 mg 0.4 mmol, 2.0 equiv) and  $\text{Ac}_2\text{O}$  (0.382 mL 20 equiv) sequentially. HFIP (2.0 mL) was added to the mixture along the inside wall of the tube. The tube was then capped and placed into a preheated hotplate (70 °C). [Note: good stirring was important for reproducibility, splashes on the wall of the tube showed adverse effects for the reaction]. Volatile matter was removed under reduced pressure and the residue was re-dissolved in methanol (2 mL). To the solution was added  $\text{K}_2\text{CO}_3$  (219 mg, 1.6 mmol). The reaction was stirred at room temperature for 1 h. A 3.0 N HCl solution (1 mL) was then added, and the mixture was extracted with DCM (3 × 5 mL). The organic layers were combined and removed under reduced pressure. The resulting residue was purified by preparative TLC using PE/EA (2/1, with 1% HOAc) as the eluent.

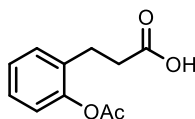

**2a<sub>mono</sub>**

**2a<sub>mono</sub>**: 3-(2-acetoxyphenyl)propanoic acid

The general procedure **A** was followed (2.5h). Pale yellow oil, 8.3 mg, 20% yield. The general procedure **B** was followed. Pale yellow oil, 20.0 mg, 48% yield.

<sup>1</sup>H NMR (600 MHz, CDCl<sub>3</sub>) δ 7.29 – 7.20 (m, 2H), 7.18 (td, *J* = 7.5, 1.3 Hz, 1H), 7.03 (dd, *J* = 7.9, 1.4 Hz, 1H). 2.86 (t, *J* = 7.9 Hz, 2H), 2.63 (t, *J* = 7.9 Hz, 2H), 2.32 (s, 3H). <sup>13</sup>C NMR (101 MHz, CDCl<sub>3</sub>) δ 179.1, 169.7, 149.1, 132.1, 130.2, 127.9, 126.5, 122.6, 34.3, 25.3, 21.0. HRMS (ESI) *m/z* calcd for C<sub>11</sub>H<sub>12</sub>O<sub>4</sub>Na<sup>+</sup> (*M*+Na<sup>+</sup>) 231.0628, found 231.0628.

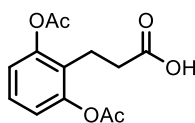

**2a<sub>di</sub>**

**2a<sub>di</sub>**: 3-(2,6-diacetoxyphenyl)propanoic acid

The general procedure **A** was followed (2.5h). Pale yellow oil, 18.4 mg, 36% yield. The general procedure **B** was followed. Pale yellow oil, 9.9 mg, 19% yield.

<sup>1</sup>H NMR (400 MHz, CDCl<sub>3</sub>) δ 7.27 (t, *J* = 8.1 Hz, 1H), 6.98 (d, *J* = 8.2 Hz, 2H), 2.80 (t, *J* = 8.0 Hz, 2H), 2.55 (t, *J* = 8.0 Hz, 2H), 2.32 (s, 6H). <sup>13</sup>C NMR (101 MHz, CDCl<sub>3</sub>) δ 178.8, 169.4, 149.9, 127.6, 125.4, 120.4, 33.3, 21.0, 20.2. HRMS (ESI) *m/z* calcd for C<sub>13</sub>H<sub>14</sub>O<sub>6</sub>Na<sup>+</sup> (*M*+Na<sup>+</sup>) 289.0683, found 289.0684.

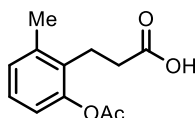

**2b**

**2b**: 3-(2-acetoxy-6-methylphenyl)propanoic acid

The general procedure **B** was followed. White solid, 25.3 mg, 57% yield, M. p.: 98.3-100.2 °C.

<sup>1</sup>H NMR (400 MHz, MeOD) δ 7.17 – 7.08 (m, 1H), 7.06 (d, *J* = 7.8 Hz, 1H), 6.86 (d, *J* = 7.9 Hz, 1H), 2.86 (t, *J* = 8.7 Hz, 2H), 2.41 (t, *J* = 8.7 Hz, 2H), 2.36 (s, 3H), 2.30 (s, 3H). <sup>13</sup>C NMR (101 MHz, MeOD) δ 176.7, 171.6, 150.7, 139.3, 132.5, 129.0, 127.9, 121.3, 34.5, 23.5, 20.8, 19.4. HRMS (ESI) *m/z* calcd for C<sub>12</sub>H<sub>14</sub>O<sub>4</sub>Na<sup>+</sup> (*M*+Na<sup>+</sup>) 245.0784, found 245.0784.

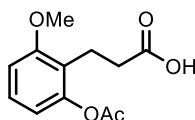

**2c**

**2c**: 3-(2-acetoxy-6-methoxyphenyl)propanoic acid

The general procedure **B** was followed. Pale yellow oil, 21.9 mg, 46% yield.

$^1\text{H}$  NMR (600 MHz,  $\text{CDCl}_3$ )  $\delta$  7.20 (t,  $J = 8.2$  Hz, 1H), 6.76 (d,  $J = 8.3$  Hz, 1H), 6.67 (d,  $J = 8.1$  Hz, 1H), 3.83 (s, 3H), 2.87 (t,  $J = 8.0$  Hz, 2H), 2.56 (t,  $J = 8.0$  Hz, 2H), 2.33 (s, 3H).  $^{13}\text{C}$  NMR (101 MHz,  $\text{CDCl}_3$ )  $\delta$  179.5, 169.9, 158.6, 149.7, 127.6, 121.2, 114.8, 108.1, 55.8, 33.1, 21.0, 19.6. HRMS (ESI)  $m/z$  calcd for  $\text{C}_{12}\text{H}_{13}\text{O}_5^-$  ( $\text{M}-\text{H}^+$ ) 237.0768, found 237.0767.

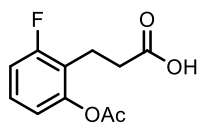

**2d**

**2d:** 3-(2-acetoxy-6-fluorophenyl)propanoic acid

The general procedure **A** was followed (4h, HFIP 4 mL). Pale yellow oil, 25.2 mg, 56% yield.

$^1\text{H}$  NMR (600 MHz,  $\text{CDCl}_3$ )  $\delta$  7.22 (td,  $J = 8.3, 6.3$  Hz, 1H), 6.95 (ddd,  $J = 9.4, 8.3, 1.1$  Hz, 1H), 6.87 (d,  $J = 8.2$  Hz, 1H), 2.90 (t,  $J = 7.8$  Hz, 2H), 2.61 (t,  $J = 7.8$  Hz, 2H), 2.33 (s, 3H).  $^{13}\text{C}$  NMR (101 MHz,  $\text{CDCl}_3$ )  $\delta$  178.8, 169.5, 161.8 (d,  $J_{\text{C-F}} = 246.5$  Hz), 149.9 (d,  $J_{\text{C-F}} = 7.4$  Hz), 128.0 (d,  $J_{\text{C-F}} = 10.0$  Hz), 120.6 (d,  $J_{\text{C-F}} = 18.5$  Hz), 118.5 (d,  $J_{\text{C-F}} = 3.4$  Hz), 113.2 (d,  $J_{\text{C-F}} = 22.3$  Hz), 33.4, 20.9, 19.0 (d,  $J_{\text{C-F}} = 3.1$  Hz).  $^{19}\text{F}$  NMR (376 MHz,  $\text{CDCl}_3$ )  $\delta$  -115.7. HRMS (ESI)  $m/z$  calcd for  $\text{C}_{11}\text{H}_{11}\text{FO}_4\text{Na}^+$  ( $\text{M}+\text{Na}^+$ ) 249.0534, found 249.0533.

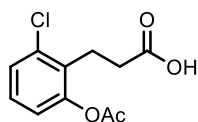

**2e**

**2e:** 3-(2-acetoxy-6-chlorophenyl)propanoic acid

The general procedure **A** was followed (3h). Pale yellow solid, 29.1 mg, 60% yield, M. p.: 98.2-100.1  $^{\circ}\text{C}$ .

$^1\text{H}$  NMR (400 MHz,  $\text{CDCl}_3$ )  $\delta$  7.28 (dd,  $J = 8.1, 1.3$  Hz, 1H), 7.19 (t,  $J = 8.1$  Hz, 1H), 6.98 (dd,  $J = 8.1, 1.3$  Hz, 1H), 3.02 (t,  $J = 8.0$  Hz, 2H), 2.61 (t,  $J = 8.0$  Hz, 2H), 2.34 (s, 3H).  $^{13}\text{C}$  NMR (101 MHz,  $\text{CDCl}_3$ )  $\delta$  178.8, 169.6, 149.9, 135.3, 130.9, 128.1, 127.5, 121.5, 32.7, 23.1, 21.0. HRMS (ESI)  $m/z$  calcd for  $\text{C}_{11}\text{H}_{11}\text{ClO}_4\text{Na}^+$  ( $\text{M}+\text{Na}^+$ ) 265.0238, found 265.0239.

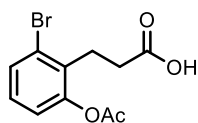

**2f**

**2f:** 3-(2-acetoxy-6-bromophenyl)propanoic acid

The general procedure **A** was followed (4h). Pale yellow solid, 37.2 mg, 65% yield, M. p.: 110.2-111.8  $^{\circ}\text{C}$ .

$^1\text{H}$  NMR (400 MHz,  $\text{CDCl}_3$ )  $\delta$  7.45 (dd,  $J = 7.9, 1.2$  Hz, 1H), 7.13 (t,  $J = 8.1$  Hz, 1H), 7.02 (dd,  $J = 8.2, 1.2$  Hz, 1H), 3.05 (t,  $J = 8.0$  Hz, 2H), 2.61 (t,  $J = 8.0$  Hz, 2H), 2.34 (s, 3H).  $^{13}\text{C}$  NMR (101 MHz,  $\text{CDCl}_3$ )  $\delta$  178.9, 169.6, 149.7, 132.5, 130.8, 128.6, 125.3, 122.1, 32.8, 25.7, 21.0. HRMS (ESI)  $m/z$  calcd for  $\text{C}_{11}\text{H}_{11}\text{BrO}_4\text{Na}^+$  ( $\text{M}+\text{Na}^+$ ) 308.9733, found 308.9737.

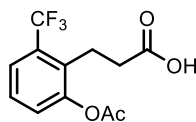

**2g**

**2g:** 3-(2-acetoxy-6-(trifluoromethyl)phenyl)propanoic acid

The general procedure **A** was followed (8h ,HFIP 4 mL). Pale yellow solid, 34.8 mg, 63% yield, M. p.: 65.7-67.3 °C.

<sup>1</sup>H NMR (400 MHz, CDCl<sub>3</sub>) δ 7.56 (d, *J* = 7.9 Hz, 1H), 7.38 (t, *J* = 8.0 Hz, 1H), δ 7.28 (d, *J* = 8.2 Hz, 1H), 3.06 (t, *J* = 8.0 Hz, 2H), 2.58 (t, *J* = 8.0 Hz, 2H), 2.37 (s, 3H). <sup>13</sup>C NMR (101 MHz, CDCl<sub>3</sub>) δ 178.7, 169.4, 150.3, 131.4, 130.52 (q, *J*<sub>C-F</sub> = 30.3 Hz), 127.8, 126.7, 124.1 (q, *J*<sub>C-F</sub> = 274.7 Hz), 124.02 (q, *J*<sub>C-F</sub> = 5.7 Hz), 34.3, 22.4, 21.0. <sup>19</sup>F NMR (376 MHz, CDCl<sub>3</sub>) δ -59.5. HRMS (ESI) *m/z* calcd for C<sub>12</sub>H<sub>11</sub>F<sub>3</sub>O<sub>4</sub>Na<sup>+</sup> (M+Na<sup>+</sup>) 299.0502, found 299.0505.

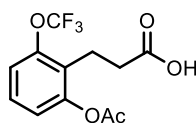

**2h**

**2h:** 3-(2-acetoxy-6-(trifluoromethoxy)phenyl)propanoic acid

The general procedure **A** was followed (4.5h ,HFIP 4 mL). Pale yellow oil, 36.2 mg, 62% yield.

<sup>1</sup>H NMR (400 MHz, CDCl<sub>3</sub>) δ 7.28 (t, *J* = 8.3 Hz, 1H), 7.16 (dt, *J* = 8.4, 1.5 Hz, 1H), 7.03 (dd, *J* = 8.2, 1.1 Hz, 1H), 2.94 (t, *J* = 8.0 Hz, 2H), 2.58 (t, *J* = 8.0 Hz, 2H), 2.34 (s, 3H). <sup>13</sup>C NMR (101 MHz, CDCl<sub>3</sub>) δ 178.7, 169.4, 150.1, 148.5 (d, *J*<sub>C-F</sub> = 1.5 Hz), 128.0, 125.8, 121.2, 120.6 (q, *J*<sub>C-F</sub> = 259.7 Hz), 117.9 (d, *J*<sub>C-F</sub> = 1.7 Hz), 33.2, 21.0, 19.8. <sup>19</sup>F NMR (376 MHz, CDCl<sub>3</sub>) δ -57.1. HRMS (ESI) *m/z* calcd for C<sub>12</sub>H<sub>11</sub>F<sub>3</sub>O<sub>5</sub>Na<sup>+</sup> (M+Na<sup>+</sup>) 315.0451, found 315.0449.

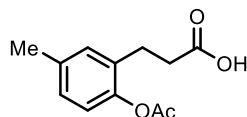

**2i**

**2i:** 3-(2-acetoxy-5-methylphenyl)propanoic acid

The general procedure **B** was followed. Pale yellow oil, 24.0 mg, 54% yield.

<sup>1</sup>H NMR (400 MHz, MeOD) δ 7.11 (s, 1H), 7.03 (dd, *J* = 8.2, 2.1 Hz, 1H), 6.89 (d, *J* = 8.2 Hz, 1H), 2.77 (t, *J* = 7.8 Hz, 2H), 2.52 (t, *J* = 7.8 Hz, 2H), 2.30 (s, 3H), 2.29 (s, 3H). <sup>13</sup>C NMR (101 MHz, MeOD) δ 176.5, 171.5, 148.2, 137.0, 133.6, 131.6, 129.0, 123.2, 35.4, 26.5, 20.9, 20.8. HRMS (ESI) *m/z* calcd for C<sub>12</sub>H<sub>14</sub>O<sub>4</sub>Na<sup>+</sup> (M+Na<sup>+</sup>) 245.0784, found 245.0783.

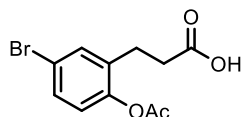

**2j**

**2j:** 3-(2-acetoxy-5-bromophenyl)propanoic acid

The general procedure **A** was followed (4h). Pale yellow solid, 23.1 mg, 40% yield, M. p.: 86.5-88.1 °C.

$^1\text{H}$  NMR (400 MHz,  $\text{CDCl}_3$ )  $\delta$  7.43 – 7.34 (m, 2H), 6.94 (d,  $J = 8.5$  Hz, 1H), 2.83 (t,  $J = 7.8$  Hz, 2H), 2.63 (t,  $J = 7.8$  Hz, 2H), 2.32 (s, 3H).  $^{13}\text{C}$  NMR (101 MHz,  $\text{CDCl}_3$ )  $\delta$  178.4, 169.4, 148.1, 134.4, 133.1, 130.9, 124.4, 119.4, 34.0, 25.1, 21.0. HRMS (ESI)  $m/z$  calcd for  $\text{C}_{11}\text{H}_{11}\text{BrO}_4\text{Na}^+$  ( $\text{M}+\text{Na}^+$ ) 308.9733, found 308.9737.

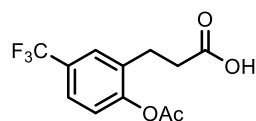

**2k**

**2k:** 3-(2-acetoxy-5-(trifluoromethyl)phenyl)propanoic acid

The general procedure **A** was followed (4h, HFIP 4 mL). Pale yellow solid, 29.1 mg, 53% yield, M. p.: 68.8-70.6  $^{\circ}\text{C}$ .

$^1\text{H}$  NMR (400 MHz,  $\text{CDCl}_3$ )  $\delta$  7.47 – 7.57 (m, 2H), 7.19 (d,  $J = 8.2$  Hz, 1H), 2.92 (t,  $J = 7.7$  Hz, 2H), 2.66 (t,  $J = 7.7$  Hz, 2H), 2.36 (s, 3H).  $^{13}\text{C}$  NMR (101 MHz,  $\text{CDCl}_3$ )  $\delta$  178.50, 169.13, 151.56, 133.13, 128.62 (q,  $J_{\text{C-F}} = 32.7$  Hz), 127.50 (q,  $J_{\text{C-F}} = 3.8$  Hz), 125.11 (q,  $J_{\text{C-F}} = 3.7$  Hz), 123.89 (q,  $J_{\text{C-F}} = 273.2$  Hz), 123.31, 33.96, 25.26, 20.99.  $^{19}\text{F}$  NMR (376 MHz,  $\text{CDCl}_3$ )  $\delta$  -60.4. HRMS (ESI)  $m/z$  calcd for  $\text{C}_{12}\text{H}_{11}\text{F}_3\text{O}_4\text{Na}^+$  ( $\text{M}+\text{Na}^+$ ) 299.0502, found 299.0506.

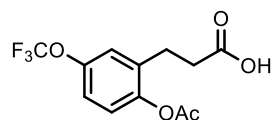

**2l**

**2l:** 3-(2-acetoxy-5-(trifluoromethoxy)phenyl)propanoic acid

The general procedure **A** was followed (4h, HFIP 4 mL). Pale yellow oil, 23.3 mg, 40% yield.

$^1\text{H}$  NMR (400 MHz,  $\text{CDCl}_3$ )  $\delta$  7.17 – 7.04 (m, 3H), 2.86 (t,  $J = 7.7$  Hz, 2H), 2.64 (t,  $J = 7.7$  Hz, 2H), 2.33 (s, 3H).  $^{13}\text{C}$  NMR (101 MHz,  $\text{CDCl}_3$ )  $\delta$  178.2, 169.4, 147.3, 146.8 (d,  $J_{\text{C-F}} = 2.2$  Hz), 134.1, 123.9, 122.8, 120.7, 120.5 (q,  $J_{\text{C-F}} = 258.6$  Hz), 33.9, 25.3, 21.0.  $^{19}\text{F}$  NMR (376 MHz,  $\text{CDCl}_3$ )  $\delta$  -58.0. HRMS (ESI)  $m/z$  calcd for  $\text{C}_{12}\text{H}_{11}\text{F}_3\text{O}_5\text{Na}^+$  ( $\text{M}+\text{Na}^+$ ) 315.0451, found 315.0448.

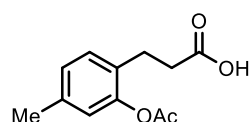

**2m<sub>mono</sub>**

**2m<sub>mono</sub>:** 3-(2-acetoxy-4-methylphenyl)propanoic acid

The general procedure **B** was followed. Pale yellow oil, 12.9 mg, 29% yield.

$^1\text{H}$  NMR (400 MHz, MeOD)  $\delta$  7.17 (d,  $J = 7.8$  Hz, 1H), 7.00 (d,  $J = 8.0$  Hz, 1H), 6.85 (s, 1H), 2.77 (t,  $J = 7.6$  Hz, 2H), 2.51 (t,  $J = 7.8$  Hz, 2H), 2.30 (s, 6H).  $^{13}\text{C}$  NMR (101 MHz, MeOD)  $\delta$  176.6, 171.4, 150.3, 138.8, 130.9, 130.8, 127.9, 124.0, 35.4, 26.20, 20.9, 20.8. HRMS (ESI)  $m/z$  calcd for  $\text{C}_{12}\text{H}_{14}\text{O}_4\text{Na}^+$  ( $\text{M}+\text{Na}^+$ ) 245.0784, found 245.0783.

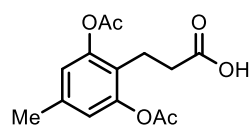

**2m<sub>di</sub>**

**2m<sub>di</sub>**: 3-(2,6-diacetoxy-4-methylphenyl)propanoic acid

The general procedure **B** was followed. Pale yellow solid, 13.0 mg, 23% yield, M. p.: 87.6-89.3 °C.

<sup>1</sup>H NMR (400 MHz, MeOD) δ 6.82 (s, 2H), 2.70 (t, *J* = 8.0 Hz, 2H), 2.39 (t, *J* = 8.0 Hz, 2H), 2.31 (s, 3H), 2.30 (s, 6H). <sup>13</sup>C NMR (101 MHz, MeOD) δ 176.4, 171.1, 151.0, 139.1, 124.2, 122.0, 34.4, 21.1, 20.9, 20.7. HRMS (ESI) *m/z* calcd for C<sub>14</sub>H<sub>16</sub>O<sub>6</sub>Na<sup>+</sup> (M+Na<sup>+</sup>) 303.0839, found 303.0839.

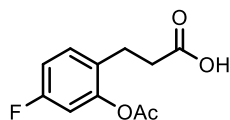

**2n<sub>mono</sub>**

**2n<sub>mono</sub>**: 3-(2-acetoxy-4-fluorophenyl)propanoic acid

The general procedure **A** was followed (2.5h). Pale yellow oil, 20.4 mg, 45% yield.

<sup>1</sup>H NMR (400 MHz, CDCl<sub>3</sub>) δ 7.22 (dd, *J* = 8.2, 6.5 Hz, 1H), 6.91 (td, *J* = 8.3, 2.6 Hz, 1H), 6.83 (dd, *J* = 9.1, 2.6 Hz, 1H), 2.83 (t, *J* = 7.7 Hz, 2H), 2.61 (t, *J* = 7.7 Hz, 2H), 2.33 (s, 3H). <sup>13</sup>C NMR (101 MHz, CDCl<sub>3</sub>) δ 178.8, 169.2, 161.5 (d, *J*<sub>C-F</sub> = 248.5 Hz), 149.5 (d, *J*<sub>C-F</sub> = 10.7 Hz), 130.9 (d, *J*<sub>C-F</sub> = 9.2 Hz), 127.9 (d, *J*<sub>C-F</sub> = 3.7 Hz), 113.4 (d, *J*<sub>C-F</sub> = 21.0 Hz), 110.5 (d, *J*<sub>C-F</sub> = 24.3 Hz), 34.3, 24.8, 21.0. <sup>19</sup>F NMR (376 MHz, CDCl<sub>3</sub>) δ -112.2. HRMS (ESI) *m/z* calcd for C<sub>11</sub>H<sub>11</sub>FO<sub>4</sub>Na<sup>+</sup> (M+Na<sup>+</sup>) 249.0534, found 249.0532.

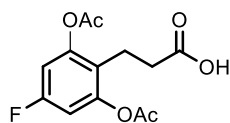

**2n<sub>di</sub>**

**2n<sub>di</sub>**: 3-(2,6-diacetoxy-4-fluorophenyl)propanoic acid

The general procedure **A** was followed (2.5h). Pale yellow solid, 10.3 mg, 18% yield, M. p.: 113.8-115.6 °C.

<sup>1</sup>H NMR (400 MHz, CDCl<sub>3</sub>) δ 6.78 (d, *J* = 8.8 Hz, 2H), 2.76 (t, *J* = 8.0 Hz, 2H), 2.52 (m, *J* = 8.0 Hz, 2H), 2.33 (s, 6H). <sup>13</sup>C NMR (101 MHz, CDCl<sub>3</sub>) δ 177.6, 168.9, 159.7, 150.2 (d, *J*<sub>C-F</sub> = 12.7 Hz), 121.3, 108.6 (d, *J*<sub>C-F</sub> = 24.4 Hz), 33.2, 21.0, 19.9. <sup>19</sup>F NMR (376 MHz, CDCl<sub>3</sub>) δ -112.1. HRMS (ESI) *m/z* calcd for C<sub>13</sub>H<sub>13</sub>FO<sub>6</sub>Na<sup>+</sup> (M+Na<sup>+</sup>) 307.0588, found 307.0581.

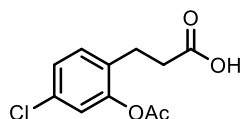

**2o<sub>mono</sub>**

**2o<sub>mono</sub>**: 3-(2-acetoxy-4-chlorophenyl)propanoic acid

The general procedure **A** was followed (3h). Pale yellow solid, 20.6 mg, 43% yield, M. p.: 85.7-87.4 °C.

<sup>1</sup>H NMR (400 MHz, CDCl<sub>3</sub>) δ 9.17 (br s, 1H), 7.24 – 7.12 (m, 2H), 7.08 (s, 1H), 2.82 (t, *J* = 7.6 Hz, 2H), 2.60 (t, *J* = 7.7 Hz, 2H), 2.32 (s, 3H). <sup>13</sup>C NMR (101 MHz, CDCl<sub>3</sub>) δ 178.8, 169.3, 149.3, 132., 131.0, 130.8, 126.6, 123.1, 34.2, 24.9, 20.9. HRMS (ESI) *m/z* calcd for C<sub>11</sub>H<sub>11</sub>ClO<sub>4</sub>Na<sup>+</sup> (M+Na<sup>+</sup>) 265.0238, found 265.0239.



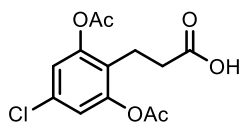

**2o<sub>di</sub>**

**2o<sub>di</sub>**: 3-(2,6-diacetoxy-4-chlorophenyl)propanoic acid

The general procedure **A** was followed (3h). Pale yellow solid, 16.5 mg, 28% yield, M. p.: 88.3-90.2 °C.

<sup>1</sup>H NMR (600 MHz, CDCl<sub>3</sub>) δ 7.02 (s, 2H), 2.76 (t, *J* = 7.8 Hz, 2H), 2.51 (t, *J* = 7.8 Hz, 2H), 2.32 (s, 6H). <sup>13</sup>C NMR (101 MHz, CDCl<sub>3</sub>) δ 178.4, 169.0, 150.1, 132.7, 124.3, 121.1, 33.2, 20.9, 20.0. HRMS (ESI) *m/z* calcd for C<sub>13</sub>H<sub>13</sub>ClO<sub>6</sub>Na<sup>+</sup> (M+Na<sup>+</sup>) 323.0293, found 323.0291.

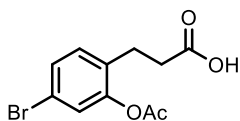

**2p<sub>mono</sub>**

**2p<sub>mono</sub>**: 3-(2-acetoxy-4-bromophenyl)propanoic acid

The general procedure **A** was followed (2.5h). Pale yellow solid, 22.3 mg, 39% yield, M. p.: 78.1-80.2 °C.

<sup>1</sup>H NMR (400 MHz, CDCl<sub>3</sub>) δ 7.31 (dd, *J* = 8.2, 2.0 Hz, 1H), 7.23 (s, 1H), 7.14 (d, *J* = 8.2 Hz, 1H), 2.81 (t, *J* = 7.7 Hz, 2H), 2.61 (t, *J* = 7.7 Hz, 2H), 2.32 (s, 3H). <sup>13</sup>C NMR (101 MHz, CDCl<sub>3</sub>) δ 178.5, 169.2, 149.5, 131.4, 131.3, 129.6, 126.0, 120.33, 34.0, 24.9, 20.9. HRMS (ESI) *m/z* calcd for C<sub>11</sub>H<sub>11</sub>BrO<sub>4</sub>Na<sup>+</sup> (M+Na<sup>+</sup>) 308.9733, found 308.9735.

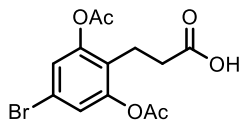

**2p<sub>di</sub>**

**2p<sub>di</sub>**: 3-(2,6-diacetoxy-4-bromophenyl)propanoic acid

The general procedure **A** was followed (2.5h). Pale yellow solid, 17.87 mg, 26% yield, M. p.: 85.6-87.3 °C.

<sup>1</sup>H NMR (400 MHz, CDCl<sub>3</sub>) δ 7.17 (s, 2H), 2.75 (t, *J* = 7.8 Hz, 2H), 2.52 (t, *J* = 7.9 Hz, 2H), 2.32 (s, 6H). <sup>13</sup>C NMR (101 MHz, CDCl<sub>3</sub>) δ 178.3, 169.0, 150.2, 124.8, 123.9, 119.8, 33.0, 20.9, 20.0. HRMS (ESI) *m/z* calcd for C<sub>13</sub>H<sub>13</sub>BrO<sub>6</sub>Na<sup>+</sup> (M+Na<sup>+</sup>) 366.9788, found 366.9787.

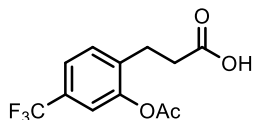

**2q<sub>mono</sub>**

**2q<sub>mono</sub>**: 3-(2-acetoxy-4-(trifluoromethyl)phenyl)propanoic acid

The general procedure **A** was followed (3h, HFIP 4 mL). Pale yellow solid, 22.8 mg, 41% yield, M. p.: 78.9-81.0 °C.

<sup>1</sup>H NMR (400 MHz, CDCl<sub>3</sub>) δ 7.45 (d, *J* = 8.0 Hz, 1H), 7.40 (s, 1H), 7.34 (d, *J* = 1.8 Hz, 1H), 2.91 (t, *J* = 7.7 Hz, 2H), 2.66 (t, *J* = 7.7 Hz, 2H), 2.35 (s, 3H). <sup>13</sup>C NMR (101 MHz, CDCl<sub>3</sub>) δ

178.4, 169.2, 149.1, 136.4, 130.8, 130.3 (q,  $J_{C-F} = 33.3$  Hz), 123.6 (q,  $J_{C-F} = 273.7$  Hz), 123.2 (q,  $J_{C-F} = 3.7$  Hz), 120.1 (q,  $J_{C-F} = 3.7$  Hz), 33.8, 25.2, 20.9.  $^{19}\text{F}$  NMR (376 MHz,  $\text{CDCl}_3$ )  $\delta$  -62.5. HRMS (ESI)  $m/z$  calcd for  $\text{C}_{12}\text{H}_{11}\text{F}_3\text{O}_4\text{Na}^+$  ( $\text{M}+\text{Na}^+$ ) 299.0502, found 299.0506.

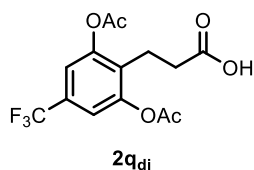

**2q<sub>di</sub>**: 3-(2,6-diacetoxy-4-(trifluoromethyl)phenyl)propanoic acid

The general procedure **A** was followed (3h, HFIP 4 mL). Pale yellow solid, 18.8 mg, 28% yield, M. p.: 102.4-104.1 °C.

$^1\text{H}$  NMR (400 MHz,  $\text{CDCl}_3$ )  $\delta$  7.27 (s, 2H), 2.84 (t,  $J = 7.9$  Hz, 2H), 2.56 (t,  $J = 7.8$  Hz, 2H), 2.35 (s, 6H).  $^{13}\text{C}$  NMR (101 MHz,  $\text{CDCl}_3$ )  $\delta$  177.9, 169.0, 150.1, 130.2 (q,  $J_{C-F} = 273.7$  Hz), 129.7, 123.1 (q,  $J_{C-F} = 273.7$  Hz), 117.7 (q,  $J_{C-F} = 3.6$  Hz), 32.8, 20.9, 20.2.  $^{19}\text{F}$  NMR (376 MHz,  $\text{CDCl}_3$ )  $\delta$  -62.6. HRMS (ESI)  $m/z$  calcd for  $\text{C}_{14}\text{H}_{13}\text{F}_3\text{O}_6\text{Na}^+$  ( $\text{M}+\text{Na}^+$ ) 357.0556, found 357.0554.

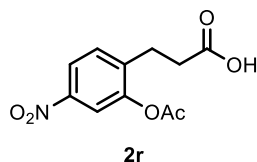

**2r**: 3-(2-acetoxy-4-nitrophenyl)propanoic acid

The general procedure **A** was followed (4.5h, HFIP 4 mL). Pale yellow solid, 22.3 mg, 44% yield, M. p.: 130.7-132.3 °C.

$^1\text{H}$  NMR (400 MHz,  $\text{CDCl}_3$ )  $\delta$  8.06 (d,  $J = 8.3$  Hz, 1H), 7.97 (s, 1H), 7.45 (d,  $J = 8.4$  Hz, 1H), 2.95 (t,  $J = 7.7$  Hz, 2H), 2.68 (t,  $J = 7.8$  Hz, 2H), 2.38 (s, 3H).  $^{13}\text{C}$  NMR (101 MHz,  $\text{CDCl}_3$ )  $\delta$  177.8, 168.9, 149.1, 147.3, 140.0, 130.8, 121.3, 118.5, 33.5, 25.3, 20.9. HRMS (ESI)  $m/z$  calcd for  $\text{C}_{11}\text{H}_{11}\text{NO}_6\text{Na}^+$  ( $\text{M}+\text{Na}^+$ ) 276.0479, found 276.0477.

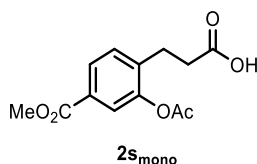

**2s<sub>mono</sub>**: 3-(2-acetoxy-4-(methoxycarbonyl)phenyl)propanoic acid

The general procedure **A** was followed (6h, HFIP 2 mL). Pale yellow oil, 23.7 mg, 45% yield,.

$^1\text{H}$  NMR (400 MHz,  $\text{CDCl}_3$ )  $\delta$  7.86 (dd,  $J = 8.0, 1.7$  Hz, 1H), 7.72 (d,  $J = 1.7$  Hz, 1H), 7.34 (d,  $J = 8.0$  Hz, 1H), 3.89 (s, 3H), 2.91 (t,  $J = 7.7$  Hz, 2H), 2.65 (t,  $J = 7.7$  Hz, 2H), 2.35 (s, 3H).  $^{13}\text{C}$  NMR (101 MHz,  $\text{CDCl}_3$ )  $\delta$  178.4, 169.4, 166.2, 148.9, 137.6, 130.2, 130.1, 127.6, 124.0, 52.4, 33.8, 25.4, 21.0. HRMS (ESI)  $m/z$  calcd for  $\text{C}_{13}\text{H}_{14}\text{NO}_6\text{Na}^+$  ( $\text{M}+\text{Na}^+$ ) 289.0683, found 289.0684.

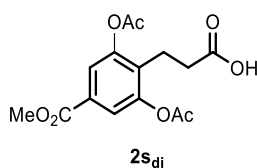

**2sai:** 3-(2,6-diacetoxy-4-(methoxycarbonyl)phenyl)propanoic acid

The general procedure **A** was followed (6h, HFIP 2 mL). Pale yellow oil, 16.2 mg, 17.3% yield,.

$^1\text{H NMR}$  (400 MHz,  $\text{CDCl}_3$ )  $\delta$  7.65 (s, 1H), 3.89 (s, 2H), 2.84 (t,  $J = 7.9$  Hz, 1H), 2.55 (t,  $J = 7.9$  Hz, 1H), 2.35 (s, 3H).  $^{13}\text{C NMR}$  (101 MHz,  $\text{CDCl}_3$ )  $\delta$  177.7, 169.2, 165.4, 149.8, 130.8, 130.1, 121.7, 52.6, 32.85, 21.0, 20.4. HRMS (ESI)  $m/z$  calcd for  $\text{C}_{15}\text{H}_{16}\text{NO}_8\text{Na}^+$  ( $\text{M}+\text{Na}^+$ ) 347.0737, found 347.0737.

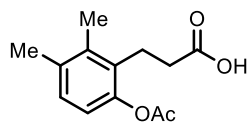

**2t**

**2t:** 3-(6-acetoxy-2,3-dimethylphenyl)propanoic acid

The general procedure **B** was followed (HFIP 4 mL). Pale yellow solid, 24.5 mg, 52% yield, M. p.: 58.4-60.2  $^{\circ}\text{C}$ .

$^1\text{H NMR}$  (400 MHz,  $\text{CDCl}_3$ )  $\delta$  7.06 (d,  $J = 8.2$  Hz, 1H), 6.80 (d,  $J = 8.2$  Hz, 1H), 2.92 (t,  $J = 8.0$  Hz, 2H), 2.50 (t,  $J = 8.0$  Hz, 2H), 2.33 (s, 3H), 2.27 (s, 3H), 2.24 (s, 3H).  $^{13}\text{C NMR}$  (101 MHz,  $\text{CDCl}_3$ )  $\delta$  178.8, 170.4, 147.4, 136.4, 135.1, 130.3, 128.9, 119.5, 33.7, 22.7, 21.1, 20.7, 15.6. HRMS (ESI)  $m/z$  calcd for  $\text{C}_{13}\text{H}_{15}\text{O}_4^-$  ( $\text{M}-\text{H}^+$ ) 235.0976, found 235.0974.

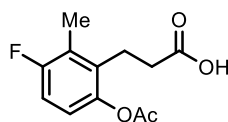

**2u**

**2u:** 3-(6-acetoxy-3-fluoro-2-methylphenyl)propanoic acid

The general procedure **A** was followed (3h, HFIP 4 mL). Pale yellow oil, 27.4 mg, 57% yield.

$^1\text{H NMR}$  (400 MHz,  $\text{CDCl}_3$ )  $\delta$  6.92 (d,  $J = 8.9$  Hz, 1H), 6.85 (dd,  $J = 8.9, 4.9$  Hz, 1H), 2.89 (t,  $J = 7.9$  Hz, 2H), 2.51 (t,  $J = 7.9$  Hz, 2H), 2.33 (s, 3H), 2.25 (d,  $J = 2.4$  Hz, 3H).  $^{13}\text{C NMR}$  (101 MHz,  $\text{CDCl}_3$ )  $\delta$  178.5, 170.1, 159.1 (d,  $J_{\text{C-F}} = 242.5$  Hz), 144.9 (d,  $J_{\text{C-F}} = 2.8$  Hz), 132.7 (d,  $J_{\text{C-F}} = 4.4$  Hz), 124.9 (d,  $J_{\text{C-F}} = 17.6$  Hz), 120.9 (d,  $J_{\text{C-F}} = 9.2$  Hz), 114.0 (d,  $J_{\text{C-F}} = 25.4$  Hz), 33.3, 22.6 (d,  $J_{\text{C-F}} = 2.2$  Hz), 20.9 (d,  $J_{\text{C-F}} = 10.2$  Hz), 11.0 (d,  $J_{\text{C-F}} = 5.5$  Hz).  $^{19}\text{F NMR}$  (376 MHz,  $\text{CDCl}_3$ )  $\delta$  -117.7. HRMS (ESI)  $m/z$  calcd for  $\text{C}_{12}\text{H}_{13}\text{FO}_4\text{Na}^+$  ( $\text{M}+\text{Na}^+$ ) 263.0690, found 263.0692.

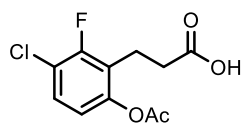

**2v**

**2v:** 3-(6-acetoxy-3-chloro-2-fluorophenyl)propanoic acid

The general procedure **A** was followed (4.5 h, HFIP 4 mL). Pale yellow solid, 26.4 mg, 51% yield, M. p.: 83.3-85.3  $^{\circ}\text{C}$ .

$^1\text{H NMR}$  (400 MHz,  $\text{CDCl}_3$ )  $\delta$  7.05 (d,  $J = 8.5$  Hz, 1H), 6.97 (dd,  $J = 8.9, 4.5$  Hz, 1H), 3.03 (t,  $J = 8.1$  Hz, 2H), 2.61 (t,  $J = 8.1$  Hz, 2H), 2.33 (s, 3H).  $^{13}\text{C NMR}$  (101 MHz,  $\text{CDCl}_3$ )  $\delta$  178.6, 169.7, 156.3 (d,  $J_{\text{C-F}} = 247.0$  Hz), 145.2 (d,  $J_{\text{C-F}} = 3.2$  Hz), 132.9, 122.2, 122.0 (d,  $J_{\text{C-F}} = 8.1$  Hz), 114.8 (d,  $J_{\text{C-F}} = 23.2$  Hz), 32.5, 23.2 (d,  $J_{\text{C-F}} = 2.1$  Hz), 20.9.  $^{19}\text{F NMR}$  (376 MHz,  $\text{CDCl}_3$ )  $\delta$  -115.1. HRMS (ESI)  $m/z$  calcd for  $\text{C}_{11}\text{H}_{10}\text{ClFO}_4\text{Na}^+$  ( $\text{M}+\text{Na}^+$ ) 283.0144, found 283.0146.

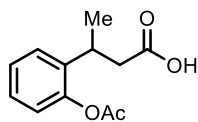

**2w<sub>mono</sub>**

**2w<sub>mono</sub>: 3-(2-acetoxyphenyl)butanoic acid**

The general procedure **A** was followed (2.5h). Pale yellow oil, 12.6 mg, 28% yield.

<sup>1</sup>H NMR (400 MHz, CDCl<sub>3</sub>) δ 7.32 – 7.27 (m, 1H), 7.25 – 7.20 (m, 2H), 7.07 – 6.99 (m, 1H), 3.44 (dq, *J* = 13.3, 6.8 Hz, 1H), 2.66 (dd, *J* = 15.5, 5.8 Hz, 1H), 2.51 (dd, *J* = 15.5, 8.9 Hz, 1H), 2.34 (s, 3H), 1.29 (d, *J* = 6.9 Hz, 3H). <sup>13</sup>C NMR (101 MHz, CDCl<sub>3</sub>) δ 178.0, 169.9, 148.2, 137.1, 127.5, 127.2, 126.6, 122.8, 41.8, 29.6, 21.1, 20.6. HRMS (ESI) *m/z* calcd for C<sub>12</sub>H<sub>14</sub>O<sub>4</sub>Na<sup>+</sup> (*M*+Na<sup>+</sup>) 245.0784, found 245.0785.

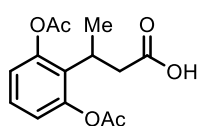

**2w<sub>di</sub>**

**2w<sub>di</sub>: 3-(2,6-diacetoxyphenyl)butanoic acid**

The general procedure **A** was followed (2.5h). Pale yellow solid, 13.5 mg, 24% yield, *M. p.*: 58.5-60.5 °C.

<sup>1</sup>H NMR (400 MHz, CDCl<sub>3</sub>) δ 7.23 (d, *J* = 8.5 Hz, 1H), 6.95 (d, *J* = 8.2 Hz, 2H), 3.54 (dq, *J* = 13.7, 6.8 Hz, 1H), 2.76 – 2.61 (m, 2H), 2.34 (s, 6H), 1.27 (d, *J* = 7.2 Hz, 3H). <sup>13</sup>C NMR (101 MHz, CDCl<sub>3</sub>) δ 177.8, 169.4, 149.6, 129.2, 127.4, 121.0, 39.6, 27.5, 21.3, 19.1. HRMS (ESI) *m/z* calcd for C<sub>14</sub>H<sub>15</sub>O<sub>6</sub><sup>-</sup> (*M*-H<sup>+</sup>) 279.0874, found 279.0874.

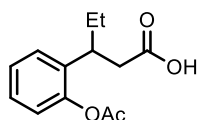

**2x<sub>mono</sub>**

**2x<sub>mono</sub>: 3-(2-acetoxyphenyl)pentanoic acid**

The general procedure **A** was followed (2.5h). Pale yellow oil, 17.4 mg, 37% yield.

<sup>1</sup>H NMR (400 MHz, CDCl<sub>3</sub>) δ 7.27 – 7.17 (m, 3H), 7.07 – 7.00 (m, 1H), 3.32 – 3.17 (m, 1H), 2.59 (d, *J* = 7.3 Hz, 2H), 2.32 (s, 3H), 1.80 – 1.54 (m, 2H), 0.78 (t, *J* = 7.3 Hz, 3H). <sup>13</sup>C NMR (101 MHz, CDCl<sub>3</sub>) δ 178.1, 169.8, 148.9, 135.4, 127.7, 127.4, 126.4, 122.8, 40.53, 36.6, 28.2, 21.1, 12.0. HRMS (ESI) *m/z* calcd for C<sub>13</sub>H<sub>15</sub>O<sub>4</sub><sup>-</sup> (*M*-H<sup>+</sup>) 235.0976, found 235.0975.

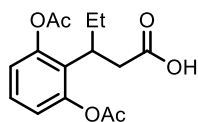

**2x<sub>di</sub>**

**2x<sub>di</sub>: 3-(2,6-diacetoxyphenyl)pentanoic acid**

The general procedure **A** was followed (2.5h). Pale yellow oil, 19.0 mg, 32% yield.

<sup>1</sup>H NMR (400 MHz, CDCl<sub>3</sub>) δ 7.25 (t, *J* = 8.0 Hz, 1H), 6.95 (d, *J* = 8.2 Hz, 2H), 3.44 – 3.32 (m, 1H), 2.69 (dd, *J* = 7.1, 2.5 Hz, 2H), 2.32 (s, 6H), 1.74 – 1.54 (m, 2H), 0.76 (t, *J* = 7.4 Hz, 3H). <sup>13</sup>C

NMR (101 MHz, CDCl<sub>3</sub>) δ 178.0, 169.3, 150.0, 127.5, 127.3, 120.9, 38.6, 34.7, 26.8, 21.2, 12.5.  
HRMS (ESI) m/z calcd for C<sub>15</sub>H<sub>17</sub>O<sub>6</sub><sup>-</sup> (M-H<sup>+</sup>) 293.1031, found 293.1031.

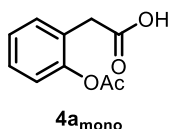

**4a<sub>mono</sub>**: 2-(2-acetoxyphenyl)acetic acid

The general procedure C was followed (50 °C, 16h). Yellow oil, 20.5 mg, 53% yield.

<sup>1</sup>H NMR (600 MHz, CDCl<sub>3</sub>) δ 7.44 – 7.28 (m, 2H), 7.22 (td, *J* = 7.4, 1.2 Hz, 1H), 7.12 (d, *J* = 8.1 Hz, 1H), 3.59 (s, 2H), 2.30 (s, 3H). <sup>13</sup>C NMR (151 MHz, CDCl<sub>3</sub>) δ 176.8, 169.4, 149.2, 131.6, 129.0, 126.4, 126.0, 122.7, 36.3, 21.0. HRMS (ESI) *m/z* calcd for C<sub>10</sub>H<sub>11</sub>O<sub>4</sub><sup>+</sup> (M+H<sup>+</sup>) 195.0652, found 195.0645.

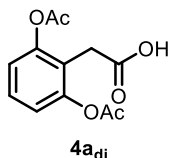

**4a<sub>di</sub>**: 2-(2,6-diacetoxyphenyl)acetic acid

The general procedure C was followed (50 °C, 16h). Brown oil, 9.1 mg, 18% yield.

<sup>1</sup>H NMR (600 MHz, CDCl<sub>3</sub>) δ 7.34 (t, *J* = 8.2 Hz, 1H), 7.06 (d, *J* = 8.2 Hz, 2H), 3.55 (s, 2H), 2.31 (s, 6H). <sup>13</sup>C NMR (151 MHz, CDCl<sub>3</sub>) δ 175.1, 169.0, 150.0, 128.6, 120.3, 119.5, 30.4, 21.0. HRMS (ESI) *m/z* calcd for C<sub>12</sub>H<sub>13</sub>O<sub>6</sub><sup>+</sup> (M+H<sup>+</sup>) 253.0707, found 253.0707.

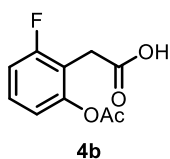

**4b**: 2-(2-acetoxy-6-fluorophenyl)acetic acid

The general procedure C was followed (70 °C, 24h). Brown oil, 33.4 mg, 79% yield.

<sup>1</sup>H NMR (400 MHz, CDCl<sub>3</sub>) δ 9.37 (br s, 1H), 7.36 – 7.20 (m, 1H), 7.06 – 6.84 (m, 2H), 3.65 (s, 2H), 2.30 (s, 3H). <sup>13</sup>C NMR (101 MHz, CDCl<sub>3</sub>) δ 168.9, 161.5 (d, *J*<sub>C-F</sub> = 247.9 Hz), 150.1 (d, *J*<sub>C-F</sub> = 6.4 Hz), 129.0 (d, *J*<sub>C-F</sub> = 9.9 Hz), 118.3 (d, *J*<sub>C-F</sub> = 3.4 Hz), 114.8 (d, *J*<sub>C-F</sub> = 18.4 Hz), 113.1 (d, *J*<sub>C-F</sub> = 22.2 Hz), 29.2, 20.8. <sup>19</sup>F NMR (376 MHz, CDCl<sub>3</sub>) δ -114.6. HRMS (ESI) *m/z* calcd for C<sub>10</sub>H<sub>8</sub>FO<sub>4</sub><sup>-</sup> (M-H<sup>+</sup>) 211.0412, found 211.0411.

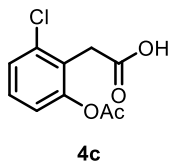

**4c**: 2-(2-acetoxy-6-chlorophenyl)acetic acid

The general procedure C was followed (70 °C, 24h). Brown oil, 37.4 mg, 82% yield.

<sup>1</sup>H NMR (400 MHz, CDCl<sub>3</sub>) δ 9.81 (br s, 1H), 7.38 – 7.20 (m, 2H), 7.06 (dd, *J* = 7.9, 1.4 Hz, 1H), 3.81 (s, 2H), 2.31 (s, 3H). <sup>13</sup>C NMR (101 MHz, CDCl<sub>3</sub>) δ 169.0, 150.2, 135.8, 129.0, 127.2, 125.3, 121.3, , 33.4, 20.9. HRMS (ESI) *m/z* calcd for C<sub>10</sub>H<sub>8</sub>ClO<sub>4</sub><sup>-</sup> (M-H<sup>+</sup>) 227.0117, found 227.0117.

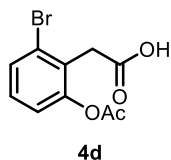

**4d:** 2-(2-acetoxy-6-bromophenyl)acetic acid

The general procedure **C** was followed (70 °C, 24h). Pale yellow solid, 42.0 mg, 77% yield, M. p.: 119.9-121.7 °C.

<sup>1</sup>H NMR (400 MHz, CDCl<sub>3</sub>) δ 7.49 (dd, *J* = 8.0, 1.2 Hz, 1H), 7.20 (t, *J* = 8.1 Hz, 1H), 7.11 (dd, *J* = 8.2, 1.2 Hz, 1H), 3.84 (s, 2H), 2.31 (s, 3H). <sup>13</sup>C NMR (101 MHz, CDCl<sub>3</sub>) δ 175.9, 168.92, 150.0, 130.5, 129.4, 127.0, 126.1, 122.0, 36.1, 20.9. HRMS (ESI) *m/z* calcd for C<sub>10</sub>H<sub>8</sub>BrO<sub>4</sub><sup>-</sup> (M-H<sup>+</sup>) 272.9757, found 272.9759.

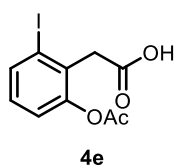

**4e:** 2-(2-acetoxy-6-iodophenyl)acetic acid

The general procedure **C** was followed (70 °C, 24h). White solid, 35.2 mg, 55% yield, M. p.: 125.5-127.5 °C.

<sup>1</sup>H NMR (400 MHz, CDCl<sub>3</sub>) δ 7.75 (dd, *J* = 7.9, 1.2 Hz, 1H), 7.12 (dd, *J* = 8.1, 1.2 Hz, 1H), 7.05 (d, *J* = 8.0 Hz, 1H), 3.86 (s, 2H), 2.30 (s, 3H). <sup>13</sup>C NMR (101 MHz, CDCl<sub>3</sub>) δ 176.0, 168.9, 149.1, 137.2, 130.2, 130.1, 122.9, 102.1, 41.1, 21.0. HRMS (ESI) *m/z* calcd for C<sub>10</sub>H<sub>10</sub>IO<sub>4</sub><sup>+</sup> (M+H<sup>+</sup>) 320.9618, found 320.9617.

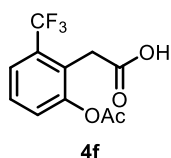

**4f:** 2-(2-acetoxy-6-(trifluoromethyl)phenyl)acetic acid

The general procedure **C** was followed (80 °C, 16h). Pale yellow solid, 39.6 mg, 76% yield, M. p.: 118.2-120.4 °C.

<sup>1</sup>H NMR (400 MHz, CDCl<sub>3</sub>) δ 8.65 (s, 1H), 7.57 (dd, *J* = 7.9, 1.3 Hz, 1H), 7.44 (t, *J* = 8.0 Hz, 1H), 7.36 (d, *J* = 8.1 Hz, 1H), 3.81 (s, 2H), 2.31 (s, 3H). <sup>13</sup>C NMR (101 MHz, CDCl<sub>3</sub>) δ 176.0, 168.7, 150.5, 130.8 (q, *J*<sub>C-F</sub> = 30.3 Hz), 128.6, 126.5, 124.8, 123.8 (q, *J*<sub>C-F</sub> = 274.7 Hz), 123.6 (q, *J*<sub>C-F</sub> = 5.6 Hz), 32.4, 20.9. <sup>19</sup>F NMR (376 MHz, CDCl<sub>3</sub>) δ -59.6. HRMS (ESI) *m/z* calcd for C<sub>11</sub>H<sub>10</sub>F<sub>3</sub>O<sub>4</sub><sup>+</sup> (M+H<sup>+</sup>) 263.0537, found 263.0537.

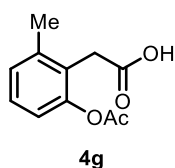

**4g:** 2-(2-acetoxy-6-methylphenyl)acetic acid

The general procedure **C** was followed (50 °C 16h). White solid, 32.7 mg, 79% yield, M. p.: 84.6-86.7 °C.

<sup>1</sup>H NMR (400 MHz, CDCl<sub>3</sub>) δ 7.22 (t, *J* = 7.8 Hz, 1H), 7.09 (d, *J* = 7.6 Hz, 1H), 6.95 (d, *J* = 8.0 Hz, 1H), 3.62 (s, 2H), 2.36 (s, 3H), 2.31 (s, 3H). <sup>13</sup>C NMR (101 MHz, CDCl<sub>3</sub>) δ 176.8, 169.5, 149.5, 139.1, 128.2, 128.1, 124.8, 120.2, 32.7, 21.0, 20.0. HRMS (ESI) *m/z* calcd for C<sub>11</sub>H<sub>11</sub>O<sub>4</sub><sup>-</sup> (M-H<sup>+</sup>) 207.0663; found, 207.0664.

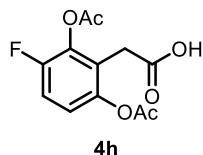

**4h:** 2-(2,6-diacetoxy-3-fluorophenyl)acetic acid

The general procedure **C** was followed (70 °C, 16h). Pale yellow solid, 32.3 mg, 60% yield, M. p.: 123.2-125.1 °C.

<sup>1</sup>H NMR (400 MHz, CDCl<sub>3</sub>) δ 7.12 (t, *J* = 9.1 Hz, 1H), 7.02 (dd, *J* = 9.1, 4.3 Hz, 1H), 3.54 (s, 2H), 2.33 (s, 3H), 2.29 (s, 3H). <sup>13</sup>C NMR (101 MHz, CDCl<sub>3</sub>) δ 175.2, 169.1, 167.6, 152.2 (d, *J*<sub>C-F</sub> = 248.3 Hz), 145.2, 137.6 (d, *J*<sub>C-F</sub> = 15.4 Hz), 121.9, 120.8 (d, *J*<sub>C-F</sub> = 7.5 Hz), 115.6 (d, *J*<sub>C-F</sub> = 20.3 Hz), 30.6, 20.8, 20.2. <sup>19</sup>F NMR (376 MHz, CDCl<sub>3</sub>) δ -128.7. HRMS (ESI) *m/z* calcd for C<sub>12</sub>H<sub>12</sub>FO<sub>6</sub><sup>+</sup> (M+H<sup>+</sup>) 271.0623, found 271.0617.

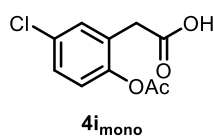

**4i<sub>mono</sub>:** 2-(2-acetoxy-5-chlorophenyl)acetic acid

The general procedure **C** was followed (70 °C, 16h). White solid, 20.0 mg, 44% yield, M. p.: 98.8-100.3 °C.

<sup>1</sup>H NMR (400 MHz, CDCl<sub>3</sub>) δ 8.03 (br s, 1H), 7.33 – 7.27 (m, 2H), 7.07 (d, *J* = 8.5 Hz, 1H), 3.55 (s, 2H), 2.29 (s, 3H). <sup>13</sup>C NMR (101 MHz, CDCl<sub>3</sub>) δ 175.9, 169.1, 147.7, 131.6, 131.4, 128.9, 127.7, 124.0, 36.0, 20.9. HRMS (ESI) *m/z* calcd for C<sub>10</sub>H<sub>10</sub>ClO<sub>4</sub><sup>+</sup> (M+H<sup>+</sup>) 229.0262, found 229.0265.

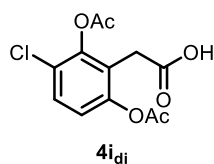

**4i<sub>di</sub>:** 2-(2,6-diacetoxy-5-chlorophenyl)acetic acid

The general procedure **C** was followed (70 °C, 16h). Pale yellow solid, 19.0 mg, 33% yield, M. p.: 93.5-95.1 °C.

<sup>1</sup>H NMR (400 MHz, CDCl<sub>3</sub>) δ 7.40 (d, *J* = 8.8 Hz, 1H), 7.05 (d, *J* = 8.8 Hz, 1H), 3.54 (s, 2H), 2.36 (s, 3H), 2.29 (s, 3H). <sup>13</sup>C NMR (101 MHz, CDCl<sub>3</sub>) δ 168.7, 167.9, 148.4, 146.6, 129.2, 125.0, 122.2, 121.3, 31.1, 20.9, 20.4. HRMS (ESI) *m/z* calcd for C<sub>12</sub>H<sub>12</sub>ClO<sub>6</sub><sup>+</sup> (M+H<sup>+</sup>) 287.0317, found 287.0310.

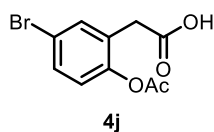



**4j:** 2-(2-acetoxy-5-bromophenyl)acetic acid

The general procedure **C** was followed (50 °C, 24h). Pale yellow solid, 41.3 mg, 76% yield, M. p.: 108.6-110.4 °C.

<sup>1</sup>H NMR (400 MHz, CDCl<sub>3</sub>) δ 7.49 (dd, *J* = 8.0, 1.2 Hz, 1H), 7.20 (t, *J* = 8.1 Hz, 1H), 7.11 (dd, *J* = 8.2, 1.2 Hz, 1H), 3.84 (s, 2H), 2.31 (s, 3H). <sup>13</sup>C NMR (101 MHz, CDCl<sub>3</sub>) δ 169.1, 148.3, 134.3, 131.8, 128.2, 124.4, 119.2, 36.0, 20.9. HRMS (ESI) *m/z* calcd for C<sub>10</sub>H<sub>9</sub>BrO<sub>4</sub>Na<sup>+</sup> (*M*+Na<sup>+</sup>) 294.9576, found 294.9580.

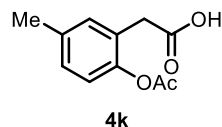**4k:** 2-(2-acetoxy-5-methylphenyl)acetic acid

The general procedure **C** was followed (40 °C, 16h). Yellow oil, 33.5 mg, 81% yield.

<sup>1</sup>H NMR (400 MHz, CDCl<sub>3</sub>) δ 7.12 (m, 2H), 6.99 (d, *J* = 8.8 Hz, 1H), 3.54 (s, 2H), 2.33 (s, 3H), 2.28 (s, 3H). <sup>13</sup>C NMR (101 MHz, CDCl<sub>3</sub>) δ 177.0, 169.6, 146.9, 136.1, 132.1, 129.5, 125.6, 122.4, 36.3, 20.93, 20.90. HRMS (ESI) *m/z* calcd for C<sub>11</sub>H<sub>12</sub>O<sub>4</sub>Na<sup>+</sup> (*M*+Na<sup>+</sup>) 231.0628, found 231.0629.

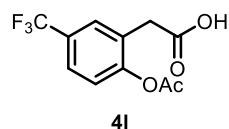**4l:** 2-(2-acetoxy-5-(trifluoromethyl)phenyl)acetic acid

The general procedure **C** was followed (70 °C, 24h). White solid, 33.3 mg, 64% yield, M. p.: 108.8-110.6 °C.

<sup>1</sup>H NMR (400 MHz, CDCl<sub>3</sub>) δ 7.60 (m, 2H), 7.36 – 7.17 (m, 1H), 3.65 (s, 2H), 2.32 (s, 3H). <sup>13</sup>C NMR (101 MHz, CDCl<sub>3</sub>) δ 176.2, 168.7, 151.7, 128.8 (q, *J*<sub>C-F</sub> = 3.8 Hz), 128.6, 126.9 (q, *J*<sub>C-F</sub> = 21.7 Hz), 126.2 (q, *J*<sub>C-F</sub> = 3.9 Hz), 123.8, 123.4 (q, *J*<sub>C-F</sub> = 181.8 Hz), 36.1, 20.9. <sup>19</sup>F NMR (376 MHz, CDCl<sub>3</sub>) δ -62.3. HRMS (ESI) *m/z* calcd for C<sub>11</sub>H<sub>9</sub>F<sub>3</sub>O<sub>4</sub>Na<sup>+</sup> (*M*+Na<sup>+</sup>) 285.0345, found 285.0346.

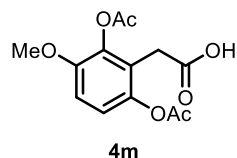**4m:** 2-(2,6-diacetoxy-3-methoxyphenyl)acetic acid

The general procedure **C** was followed (50 °C, 24h). Yellow oil, 20.9 mg, 37% yield.

<sup>1</sup>H NMR (400 MHz, CDCl<sub>3</sub>) δ 7.88 (br s, 1H), 7.00 (d, *J* = 9.0 Hz, 1H), 6.90 (d, *J* = 9.0 Hz, 1H), 3.80 (s, 3H), 3.50 (s, 2H), 2.30 (s, 3H), 2.27 (s, 3H). <sup>13</sup>C NMR (101 MHz, CDCl<sub>3</sub>) δ 175.3, 169.5, 168.4, 149.3, 142.6, 139.0, 121.0, 120.2, 111.3, 56.3, 30.7, 20.8, 20.4.

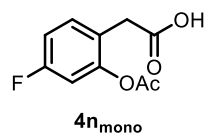**4n<sub>mono</sub>:** 2-(2-acetoxy-4-fluorophenyl)acetic acid

The general procedure **C** was followed (50 °C, 48h). Brown oil, 25.3 mg, 60% yield.

<sup>1</sup>H NMR (400 MHz, CDCl<sub>3</sub>) δ 7.27 (dd, *J* = 8.4, 2.4 Hz, 1H), 6.70- 6.788 (m, 2H), 3.55 (s, 2H), 2.29 (s,

3H).  $^{13}\text{C}$  NMR (101 MHz,  $\text{CDCl}_3$ )  $\delta$  176.8, 168.8, 162.2 (d,  $J_{\text{C-F}} = 9.8$  Hz) 149.7 (d,  $J_{\text{C-F}} = 10.7$  Hz), 132.2 (d,  $J_{\text{C-F}} = 9.4$  Hz), 121.8 (d,  $J_{\text{C-F}} = 3.7$  Hz), 113.4 (d,  $J_{\text{C-F}} = 21.3$  Hz), 110.7 (d,  $J_{\text{C-F}} = 24.6$  Hz), 35.6, 20.9.  $^{19}\text{F}$  NMR (376 MHz,  $\text{CDCl}_3$ )  $\delta$  -111.9. HRMS (ESI)  $m/z$  calcd for  $\text{C}_{10}\text{H}_9\text{FO}_4\text{Na}^+$  ( $\text{M}+\text{Na}^+$ ) 235.0377, found 235.0378.

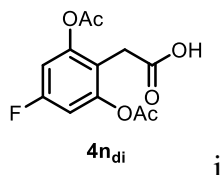

**4n<sub>di</sub>**: 2-(2,6-diacetoxy-4-fluorophenyl)acetic acid

The general procedure **C** was followed (50  $^{\circ}\text{C}$ , 48h). White solid, 11.8 mg, 22% yield, M. p.: 117.7-119.9  $^{\circ}\text{C}$ .

$^1\text{H}$  NMR (400 MHz,  $\text{CDCl}_3$ )  $\delta$  6.85 (d,  $J = 8.8$  Hz, 2H), 3.50 (s, 2H), 2.30 (s, 6H).  $^{13}\text{C}$  NMR (101 MHz,  $\text{CDCl}_3$ )  $\delta$  168.5, 161.4 (d,  $J_{\text{C-F}} = 248.3$  Hz), 150.3 (d,  $J_{\text{C-F}} = 12.9$  Hz), 115.7, 108.5 (d,  $J_{\text{C-F}} = 24.7$  Hz), 30.1, 20.9.  $^{19}\text{F}$  NMR (376 MHz,  $\text{CDCl}_3$ )  $\delta$  -110.4. HRMS (ESI)  $m/z$  calcd for  $\text{C}_{12}\text{H}_{11}\text{FO}_6\text{Na}^+$  ( $\text{M}+\text{Na}^+$ ) 293.0432, found 293.0435.

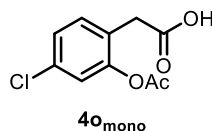

**4o<sub>mono</sub>**: 2-(2-acetoxy-4-chlorophenyl)acetic acid

The general procedure **C** was followed (50  $^{\circ}\text{C}$ , 48h). Pale yellow solid, 25.5 mg, 56% yield, M. p.: 73.3-75.1  $^{\circ}\text{C}$ .

$^1\text{H}$  NMR (400 MHz,  $\text{CDCl}_3$ )  $\delta$  7.35 (dd,  $J = 8.2, 2.0$  Hz, 1H), 7.31 (s, 1H), 3.54 (s, 2H), 2.29 (s, 3H).  $^{13}\text{C}$  NMR (101 MHz,  $\text{CDCl}_3$ )  $\delta$  168.8, 149.5, 134.0, 132.3, 126.6, 124.6, 123.3, 35.8, 20.8. HRMS (ESI)  $m/z$  calcd for  $\text{C}_{10}\text{H}_9\text{ClO}_4\text{Na}^+$  ( $\text{M}+\text{Na}^+$ ) 251.0082, found 251.0082.

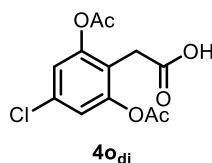

**4o<sub>di</sub>**: 2-(2,6-diacetoxy-4-chlorophenyl)acetic acid

The general procedure **C** was followed (50  $^{\circ}\text{C}$ , 48h). Pale yellow solid, 15.6 mg, 27% yield, M. p.: 135.8-137.7  $^{\circ}\text{C}$ .

$^1\text{H}$  NMR (400 MHz,  $\text{CDCl}_3$ )  $\delta$  7.10 (s, 2H), 3.51 (s, 2H), 2.29 (s, 6H).  $^{13}\text{C}$  NMR (101 MHz,  $\text{CDCl}_3$ )  $\delta$  168.4, 150.1, 133.7, 120.9, 118.3, 30.2, 20.8. HRMS (ESI)  $m/z$  calcd for  $\text{C}_{12}\text{H}_{10}\text{ClO}_6^-$  ( $\text{M}-\text{H}^+$ ) 285.0171, found 285.0171.

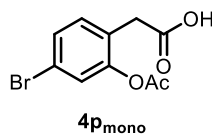

**4p<sub>mono</sub>**: 2-(2-acetoxy-4-bromophenyl)acetic acid

The general procedure **C** was followed (50  $^{\circ}\text{C}$ , 48h). Pale yellow solid, 28.0 mg, 52% yield, M. p.: 80.6-82.0  $^{\circ}\text{C}$ .

$^1\text{H}$  NMR (400 MHz,  $\text{CDCl}_3$ )  $\delta$  7.38 – 7.29 (m, 2H), 7.19 (d,  $J = 8.2$  Hz, 1H), 3.54 (s, 2H), 2.29 (s, 3H).  
 $^{13}\text{C}$  NMR (101 MHz,  $\text{CDCl}_3$ )  $\delta$  176.4, 168.8, 149.6, 132.6, 129.5, 126.1, 125.1, 121.6, 35.8, 20.8.  
HRMS (ESI)  $m/z$  calcd for  $\text{C}_{10}\text{H}_9\text{BrO}_4\text{Na}^+$  ( $\text{M}+\text{Na}^+$ ) 294.9576, found 294.9577.

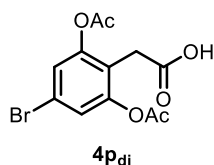

**4p<sub>di</sub>**: 2-(2,6-diacetoxy-4-bromophenyl)acetic acid

The general procedure C was followed (50  $^\circ\text{C}$ , 48h). Pale yellow solid, 17.4 mg, 26% yield, M. p.: 156.4-158.7  $^\circ\text{C}$ .

$^1\text{H}$  NMR (400 MHz,  $\text{CDCl}_3$ )  $\delta$  7.25 (s, 2H), 3.50 (s, 2H), 2.30 (s, 6H).  $^{13}\text{C}$  NMR (101 MHz,  $\text{CDCl}_3$ )  $\delta$  175.2, 168.5, 150.2, 123.8, 120.9, 118.9, 30.3, 20.9. HRMS (ESI)  $m/z$  calcd for  $\text{C}_{12}\text{H}_{11}\text{BrO}_6\text{Na}^+$  ( $\text{M}+\text{Na}^+$ ) 352.9631, found 352.9633.

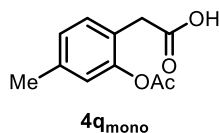

**4q<sub>mono</sub>**: 2-(2-acetoxy-4-methylphenyl)acetic acid

The general procedure C was followed (40  $^\circ\text{C}$ , 24h). Pale yellow oil, 23.6 mg, 57% yield.

$^1\text{H}$  NMR (400 MHz, MeOD)  $\delta$  7.20 (d,  $J = 7.8$  Hz, 1H), 7.03 (d,  $J = 8.6$  Hz, 1H), 6.91 (s, 1H), 3.49 (s, 2H), 2.33 (s, 3H), 2.26 (s, 3H).  $^{13}\text{C}$  NMR (101 MHz, MeOD)  $\delta$  174.9, 170.9, 150.5, 139.7, 132.2, 127.8, 125.6, 124.1, 36.8, 21.0, 20.7. HRMS (ESI)  $m/z$  calcd for  $\text{C}_{11}\text{H}_{11}\text{O}_4^-$  ( $\text{M}-\text{H}^+$ ) 207.0663; found, 207.0662.

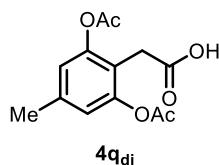

**4q<sub>di</sub>**: 2-(2,6-diacetoxy-4-methylphenyl)acetic acid

The general procedure C was followed (40  $^\circ\text{C}$ , 24h). Pale yellow solid, 12.6 mg, 24% yield.

$^1\text{H}$  NMR (400 MHz, MeOD)  $\delta$  6.88 (s, 2H), 3.44 (s, 2H), 2.34 (s, 3H), 2.28 (s, 6H).  $^{13}\text{C}$  NMR (101 MHz, MeOD)  $\delta$  174.0, 170.6, 151.1, 139.7, 121.8, 119.07, 31.0, 21.1, 20.7. HRMS (ESI)  $m/z$  calcd for  $\text{C}_{13}\text{H}_{14}\text{O}_6\text{Na}^+$  ( $\text{M}+\text{Na}^+$ ) 289.0683, found 289.0683.

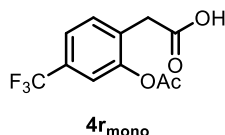

**4r<sub>mono</sub>**: 2-(2-acetoxy-4-(trifluoromethyl)phenyl)acetic acid

The general procedure C was followed (60  $^\circ\text{C}$ , 24h). White solid, 33.8 mg, 65% yield, M. p.: 111.4-113.1  $^\circ\text{C}$ .

$^1\text{H}$  NMR (400 MHz,  $\text{CDCl}_3$ )  $\delta$  7.51 – 7.43 (m, 2H), 7.42 (s, 1H), 3.65 (s, 2H), 2.31 (s, 3H).  $^{13}\text{C}$  NMR (101 MHz,  $\text{CDCl}_3$ )  $\delta$  168.9, 149.3, 132.2, 131.4 (q,  $J_{\text{C-F}} = 33.4$  Hz), 130.1, 123.5, (q,  $J_{\text{C-F}} = 273.7$  Hz) 123.1 (q,  $J_{\text{C-F}} = 3.6$  Hz), 120.2 (q,  $J_{\text{C-F}} = 3.9$  Hz), 119.4, 36.1, 20.8.  $^{19}\text{F}$  NMR (376 MHz,  $\text{CDCl}_3$ )  $\delta$

-62.6. HRMS (ESI)  $m/z$  calcd for  $C_{11}H_9F_3O_4Na^+$  ( $M+Na^+$ ) 285.0345, found 285.0346.

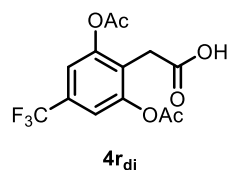

**4r<sub>di</sub>**: 2-(2,6-diacetoxy-4-(trifluoromethyl)phenyl)acetic acid

The general procedure **C** was followed (60 °C, 24h). White solid, 8.4 mg, 13% yield, M. p.: 141.2-143.1 °C.

<sup>1</sup>H NMR (400 MHz, CDCl<sub>3</sub>) δ 7.35 (s, 2H), 3.59 (s, 2H), 2.32 (s, 6H). <sup>13</sup>C NMR (101 MHz, CDCl<sub>3</sub>) δ 174.7, 168.5, 150.2, 131.0 (q,  $J_{C-F}$  = 34.0 Hz), 123.6, 123.1 (q,  $J_{C-F}$  = 273.7 Hz), 117.6 (q,  $J_{C-F}$  = 3.8 Hz), 30.5, 20.8. <sup>19</sup>F NMR (376 MHz, CDCl<sub>3</sub>) δ -62.8. HRMS (ESI)  $m/z$  calcd for  $C_{13}H_{11}F_3O_6Na^+$  ( $M+Na^+$ ) 343.0400, found 343.0401.

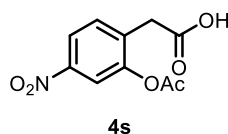

**4s**: 2-(2-acetoxy-4-nitrophenyl)acetic acid

The general procedure **C** was followed (70 °C, 24h). White solid, 21.1 mg, 44% yield, M. p.: 133.6-135.7 °C.

<sup>1</sup>H NMR (400 MHz, CDCl<sub>3</sub>) δ 8.09 (dd,  $J$  = 8.4, 2.3 Hz, 1H), 8.04 (d,  $J$  = 2.3 Hz, 1H), 7.51 (d,  $J$  = 4.0 Hz, 1H), 3.70 (s, 2H), 2.35 (s, 3H). <sup>13</sup>C NMR (101 MHz, CDCl<sub>3</sub>) δ 175.5, 168.5, 149.4, 148.0, 133.3, 132.2, 121.2, 118.5, 36.1, 20.8. HRMS (ESI)  $m/z$  calcd for  $C_{10}H_9NO_6Na^+$  ( $M+Na^+$ ) 262.0322, found 262.0322.

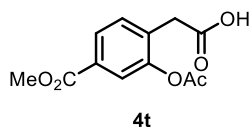

**4t**: 2-(2-acetoxy-4-(methoxycarbonyl)phenyl)acetic acid

The general procedure **C** was followed (50 °C, 16h). Pale yellow oil, 30.0 mg, 61% yield.

<sup>1</sup>H NMR (400 MHz, CDCl<sub>3</sub>) δ 7.90 (dd,  $J$  = 7.9, 1.7 Hz, 1H), 7.79 (d,  $J$  = 1.7 Hz, 1H), 7.41 (d,  $J$  = 8.0 Hz, 1H), 3.91 (s, 3H), 3.64 (s, 2H), 2.32 (s, 3H). <sup>13</sup>C NMR (101 MHz, CDCl<sub>3</sub>) δ 176.1, 169.0, 166.1, 149.1, 131.1, 131.1, 131.0, 127.5, 124.0, 52.5, 36.3, 20.9 (d,  $J$  = 6.0 Hz). HRMS (ESI)  $m/z$  calcd for  $C_{12}H_{12}O_6Na^+$  ( $M+Na^+$ ) 275.0526, found 275.0528.

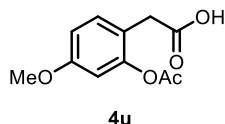

**4u**: 2-(2-acetoxy-4-(methoxycarbonyl)phenyl)acetic acid

The general procedure **C** was followed (50 °C, 16h). Pale yellow oil, 12.5 mg, 28% yield.

<sup>1</sup>H NMR (600 MHz, (CD<sub>3</sub>)<sub>2</sub>CO) δ 7.28 (d,  $J$  = 8.5 Hz, 1H), 6.80 (dd,  $J$  = 8.5, 2.7 Hz, 1H), 6.72 (d,  $J$  = 2.6 Hz, 1H), 3.78 (s, 3H), 3.48 (s, 2H), 2.25 (s, 3H). <sup>13</sup>C NMR (151 MHz, (CD<sub>3</sub>)<sub>2</sub>CO) δ 172.4, 169.2, 160.4, 151.1, 132.6, 120.4, 112.2, 109.3, 55.8, 35.7, 20.8. HRMS (ESI)  $m/z$  calcd for  $C_{11}H_{12}O_5Na^+$  ( $M+Na^+$ ) 247.0577, found 247.0578.

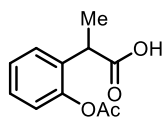

**4v<sub>mono</sub>**

**4v<sub>mono</sub>**: 2-(2-acetoxyphenyl)propanoic acid

The general procedure **C** was followed (50 °C, 16h). Pale yellow oil, 24.1 mg, 58% yield.

<sup>1</sup>H NMR (400 MHz, CDCl<sub>3</sub>) δ 7.38 (dd, *J* = 7.5, 1.8 Hz, 1H), 7.31 (td, *J* = 7.6, 1.7 Hz, 1H), 7.24 (td, *J* = 7.6, 1.6 Hz, 1H), 7.09 (dd, *J* = 8.0, 1.4 Hz, 1H), 3.86 (q, *J* = 7.2 Hz, 1H), 2.30 (s, 3H), 1.49 (d, *J* = 7.2 Hz, 3H). <sup>13</sup>C NMR (101 MHz, CDCl<sub>3</sub>) δ 180.0, 169.5, 148.4, 132.0, 128.7, 128.5, 126.5, 122.8, 39.7, 20.9, 17.1. HRMS (ESI) *m/z* calcd for C<sub>11</sub>H<sub>12</sub>O<sub>4</sub>Na<sup>+</sup> (*M*+Na<sup>+</sup>) 231.0628, found 231.0627.

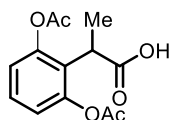

**4t<sub>di</sub>**

**4t<sub>di</sub>**: 2-(2,6-diacetoxyphenyl)propanoic acid

The general procedure **C** was followed (50 °C, 16h). Pale yellow solid, 16.0 mg, 30% yield, *M. p.*: 101.5-103.7 °C.

<sup>1</sup>H NMR (400 MHz, CDCl<sub>3</sub>) δ 7.30 (t, *J* = 8.2 Hz, 1H), 7.03 (d, *J* = 8.2 Hz, 2H), 3.90 (q, *J* = 7.1 Hz, 1H), 2.28 (s, 6H), 1.35 (d, *J* = 7.2 Hz, 3H). <sup>13</sup>C NMR (101 MHz, CDCl<sub>3</sub>) δ 178.5, 169.0, 149.0, 127.98, 125.9, 120.5, 36.0, 20.8, 15.6. HRMS (ESI) *m/z* calcd for C<sub>13</sub>H<sub>13</sub>O<sub>6</sub><sup>-</sup> (*M*-H<sup>+</sup>) 265.0718, found, 265.0718.

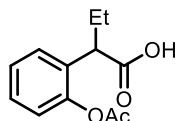

**4w<sub>mono</sub>**

**4w<sub>mono</sub>**: 2-(2-acetoxyphenyl)butanoic acid

The general procedure **C** was followed (50 °C, 16h). Pale yellow oil, 14.6 mg, 33% yield.

<sup>1</sup>H NMR (400 MHz, CDCl<sub>3</sub>) δ 7.39 (dd, *J* = 7.6, 1.8 Hz, 1H), 7.30 (td, *J* = 7.7, 1.8 Hz, 1H), 7.23 (td, *J* = 7.5, 1.4 Hz, 1H), 7.08 (dd, *J* = 7.9, 1.4 Hz, 1H), 3.63 (t, *J* = 7.6 Hz, 1H), 2.31 (s, 3H), 2.17 – 2.02 (m, 1H), 1.87 – 1.70 (m, 1H), 0.90 (t, *J* = 7.3 Hz, 3H). <sup>13</sup>C NMR (101 MHz, CDCl<sub>3</sub>) δ 169.6, 148.7, 130.6, 129.1, 128.5, 126.5, 122.9, 46.8, 25.2, 21.0, 12.2. HRMS (ESI) *m/z* calcd for C<sub>12</sub>H<sub>13</sub>O<sub>4</sub><sup>-</sup> (*M*-H<sup>+</sup>) 221.0819; found, 221.0819.

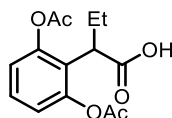

**4w<sub>di</sub>**

**4w<sub>di</sub>**: 2-(2,6-diacetoxyphenyl)butanoic acid

The general procedure **C** was followed (50 °C, 16h). Yellow solid, 35.3 mg, 63% yield, *M. p.*: 116.2-118.7 °C.

<sup>1</sup>H NMR (400 MHz, CDCl<sub>3</sub>) δ 7.31 (t, *J* = 8.2 Hz, 1H), 7.04 (d, *J* = 8.2 Hz, 2H), 3.77 – 3.68 (m, 1H), 2.27 (s, 6H), 2.16 – 2.06 (m, 1H), 1.63 (dt, *J* = 13.8, 7.6 Hz, 1H), 0.82 (t, *J* = 7.5 Hz, 3H). <sup>13</sup>C NMR

(101 MHz, CDCl<sub>3</sub>)  $\delta$  178.1, 169.0, 149.4, 128.1, 124.3, 120.6, 43.2, 23.4, 20.9, 12.3. HRMS (ESI)  $m/z$  calcd for C<sub>14</sub>H<sub>15</sub>O<sub>6</sub><sup>-</sup> (M-H<sup>+</sup>) 279.0874; found, 279.0874.

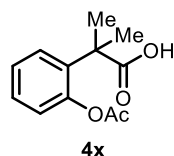

**4x:** 2-(2-acetoxyphenyl)-2-methylpropanoic acid

The general procedure C was followed (50 °C, 16h). White solid, 32.4 mg, 73% yield, M. p.: 122.1-124.0 °C.

<sup>1</sup>H NMR (400 MHz, CDCl<sub>3</sub>)  $\delta$  7.43 (dd,  $J = 7.7, 1.7$  Hz, 1H), 7.35 – 7.28 (td,  $J = 7.9, 2.0$  Hz, 1H), 7.28 – 7.21 (td,  $J = 7.9, 1.2$  Hz, 1H), 7.14 (dd,  $J = 7.9, 1.5$  Hz, 1H), 2.23 (s, 3H), 1.54 (s, 6H). <sup>13</sup>C NMR (101 MHz, CDCl<sub>3</sub>)  $\delta$  183.2, 169.1, 148.0, 136.1, 128.1, 126.2, 126.1, 123.3, 44.5, 25.9, 21.0. HRMS (ESI)  $m/z$  calcd for C<sub>12</sub>H<sub>14</sub>O<sub>4</sub>Na<sup>+</sup> (M+Na<sup>+</sup>) 245.0784, found 245.0785.

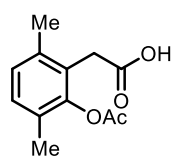

**4y:** 2-(2-acetoxy-3,6-dimethylphenyl)acetic acid

The general procedure C was followed (70 °C, 16h). White solid, 28.2 mg, 64% yield, M. p.: 128.2-130.4 °C.

<sup>1</sup>H NMR (400 MHz, CDCl<sub>3</sub>)  $\delta$  7.08 (d,  $J = 7.8$  Hz, 1H), 7.02 (d,  $J = 7.8$  Hz, 1H), 3.57 (s, 2H), 2.34 (s, 3H), 2.32 (s, 3H), 2.12 (s, 3H). <sup>13</sup>C NMR (101 MHz, CDCl<sub>3</sub>)  $\delta$  177.0, 169.1, 148.3, 136.4, 130.0, 128.1, 128.1, 125.0, 33.0, 20.6, 19.7, 16.4. HRMS (ESI)  $m/z$  calcd for C<sub>12</sub>H<sub>13</sub>O<sub>4</sub><sup>-</sup> (M-H<sup>+</sup>) 221.0819; found, 221.0820.

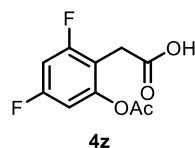

**4z:** 2-(2-acetoxy-4,6-difluorophenyl)acetic acid

The general procedure C was followed (90 °C, 12h). Pale yellow solid, 20.7 mg, 45% yield, M. p.: 93.3-95.1 °C.

<sup>1</sup>H NMR (400 MHz, CDCl<sub>3</sub>)  $\delta$  8.78 (br, 1H), 6.79 – 6.75 (m, 2H), 3.60 (s, 2H), 2.30 (s, 3H). <sup>13</sup>C NMR (101 MHz, CDCl<sub>3</sub>)  $\delta$  175.9, 168.4, 162.9 (dd,  $J_{C-F} = 37.7, 14.9$  Hz), 160.5 (dd,  $J_{C-F} = 37.4, 14.7$  Hz), 150.5 (dd,  $J_{C-F} = 13.2, 8.5$  Hz), 110.9 (dd,  $J_{C-F} = 18.9, 4.4$  Hz), 106.8 (dd,  $J_{C-F} = 24.9, 4.0$  Hz), 101.9 (t,  $J_{C-F} = 26.0$  Hz), 28.8 (d,  $J_{C-F} = 3.2$  Hz), 20.8. <sup>19</sup>F NMR (376 MHz, CDCl<sub>3</sub>)  $\delta$  -110.4 (d,  $J = 6.7$  Hz), -113.4 (d,  $J = 7.2$  Hz). HRMS (ESI)  $m/z$  calcd for C<sub>10</sub>H<sub>7</sub>F<sub>2</sub>O<sub>4</sub><sup>-</sup> (M-H<sup>+</sup>) 229.0318; found, 229.0317.

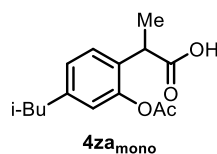

**4za<sub>mono</sub>:** 2-(2-acetoxy-4-isobutylphenyl)propanoic acid

The general procedure C was followed (50 °C, 16h). Pale yellow oil, 16.5 mg, 31% yield.

<sup>1</sup>H NMR (400 MHz, CDCl<sub>3</sub>)  $\delta$  7.26 (d,  $J = 8.0$  Hz, 1H), 7.01 (d,  $J = 8.0$  Hz, 1H), 6.87 (s, 1H), 3.80 (q,  $J$

= 7.2 Hz, 1H), 2.45 (d,  $J = 7.1$  Hz, 2H), 2.28 (s, 3H), 1.91 – 1.78 (m, 1H), 1.46 (d,  $J = 7.2$  Hz, 3H), 0.90 (d,  $J = 6.6$  Hz, 6H).  $^{13}\text{C}$  NMR (101 MHz,  $\text{CDCl}_3$ )  $\delta$  179.9, 169.6, 148.1, 142.5, 129.1, 128.2, 127.4, 123.3, 45.0, 39.4, 30.2, 22.5, 21.0, 17.2. HRMS (ESI)  $m/z$  calcd for  $\text{C}_{15}\text{H}_{20}\text{O}_4\text{Na}^+$  ( $\text{M}+\text{Na}^+$ ) 287.1254, found 287.1250.

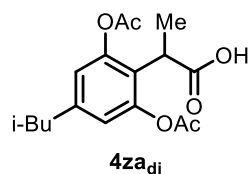

**4za<sub>dii</sub>**: 2-(2,6-diacetoxy-4-isobutylphenyl)propanoic acid

The general procedure C was followed (50 °C, 16h). Pale yellow oil, 29.1 mg, 45% yield.

$^1\text{H}$  NMR (400 MHz,  $\text{CDCl}_3$ )  $\delta$  6.81 (s, 2H), 3.83 (q,  $J = 7.1$  Hz, 1H), 2.45 (d,  $J = 7.1$  Hz, 2H), 2.26 (s, 6H), 1.84 (dt,  $J = 13.5, 6.8$  Hz, 1H), 1.33 (d,  $J = 7.2$  Hz, 3H), 0.90 (d,  $J = 6.6$  Hz, 6H).  $^{13}\text{C}$  NMR (101 MHz,  $\text{CDCl}_3$ )  $\delta$  178.7, 169.2 (d,  $J = 1.6$  Hz), 148.7, 142.4, 123.0, 121.2, 44.9, 36.0, 30.0, 22.4 (d,  $J = 1.6$  Hz), 20.9, 15.7. HRMS (ESI)  $m/z$  calcd for  $\text{C}_{17}\text{H}_{22}\text{O}_6\text{Na}^+$  ( $\text{M}+\text{Na}^+$ ) 345.1309, found 345.1309.

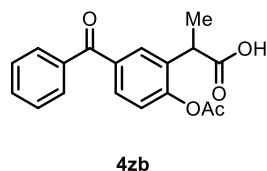

**4zb**: 2-(2-acetoxy-5-benzoylphenyl)propanoic acid

The general procedure C was followed (70 °C, 24h). Pale yellow oil, 43.3 mg, 69% yield.

$^1\text{H}$  NMR (400 MHz,  $\text{CDCl}_3$ )  $\delta$  7.89 (s, 1H), 7.79 (dd,  $J = 8.1, 1.3$  Hz, 2H), 7.74 (dd,  $J = 8.4, 2.1$  Hz, 1H), 7.59 (t,  $J = 7.5$  Hz, 1H), 7.48 (t,  $J = 7.6$  Hz, 2H), 7.23 (d,  $J = 8.4$  Hz, 1H), 3.93 (q,  $J = 7.2$  Hz, 1H), 2.33 (s, 3H), 1.53 (d,  $J = 7.3$  Hz, 3H).  $^{13}\text{C}$  NMR (101 MHz,  $\text{CDCl}_3$ )  $\delta$  195.6, 179.4, 168.8, 151.7, 137.3, 135.5, 132.7, 132.4, 131.0, 130.6, 130.1, 128.5, 122.8, 39.9, 20.9, 16.9. HRMS (ESI)  $m/z$  calcd for  $\text{C}_{18}\text{H}_{15}\text{O}_5^-$  ( $\text{M}-\text{H}^+$ ) 311.0925; found, 311.0918.

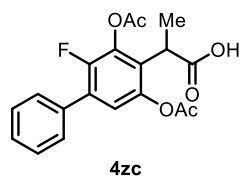

**4zc**: 2-(3,5-diacetoxy-2-fluoro-[1,1'-biphenyl]-4-yl)propanoic acid

The general procedure C was followed (70 °C, 16h). Yellow oil, 44.2 mg, 61% yield.

$^1\text{H}$  NMR (400 MHz,  $\text{CDCl}_3$ )  $\delta$  7.82 (br, 1H), 7.57 – 7.49 (m, 2H), 7.48 – 7.35 (m, 3H), 7.14 (d,  $J = 6.3$  Hz, 1H), 3.94 (q,  $J = 7.1$  Hz, 1H), 2.32 (d,  $J = 19.6$  Hz, 6H), 1.41 (d,  $J = 7.2$  Hz, 3H).  $^{13}\text{C}$  NMR (101 MHz,  $\text{CDCl}_3$ )  $\delta$  178.1, 169.2, 167.8, 149.5 (d,  $J_{\text{C-F}} = 250.5$  Hz), 144.0 (d,  $J_{\text{C-F}} = 3.5$  Hz), 137.4 (d,  $J_{\text{C-F}} = 16.1$  Hz), 134.0, 129.3 (d,  $J_{\text{C-F}} = 13.4$  Hz), 129.1 (d,  $J_{\text{C-F}} = 2.8$  Hz), 128.7, 128.5, 127.0, 121.8 (d,  $J_{\text{C-F}} = 3.4$  Hz), 36.4, 20.8, 20.2, 15.6.  $^{19}\text{F}$  NMR (376 MHz,  $\text{CDCl}_3$ )  $\delta$  -133.6. HRMS (ESI)  $m/z$  calcd for  $\text{C}_{19}\text{H}_{16}\text{FO}_6^-$  ( $\text{M}-\text{H}^+$ ) 359.0936; found, 359.0936.

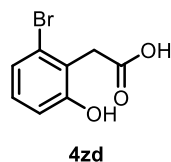

**4zd:** 2-(2-bromo-6-hydroxyphenyl)acetic acid

The general procedure **D** was followed. White solid, 29.9 mg, 65% yield, M. p.: 130.1-132.1 °C.

<sup>1</sup>H NMR (400 MHz, MeOD) δ 7.04 (d, *J* = 8.0 Hz, 1H), 6.98 (t, *J* = 8.0 Hz, 1H), 6.77 (d, *J* = 8.1 Hz, 1H), 3.82 (s, 2H). <sup>13</sup>C NMR (101 MHz, MeOD) δ 173.7, 156.9, 128.7, 125.7, 123.0, 122.2, 113.7, 34.9.

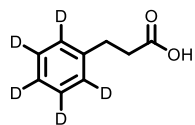

**5**

**5:** 3-(phenyl-d5)propanoic acid

<sup>1</sup>H NMR (600 MHz, CDCl<sub>3</sub>) δ 2.97 (t, *J* = 7.8 Hz, 2H), 2.70 (t, *J* = 7.8 Hz, 2H).



## 2.6 Mechanistic studies

### Results from the kinetic isotope experiments with 1a and 5a:

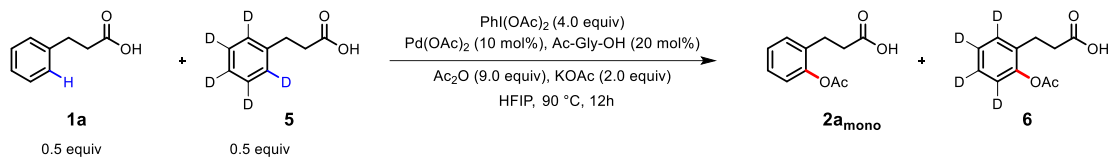

| Entry <sup>a</sup> | Time (min) | % Conv. <b>2a</b> | % Conv. <b>2y</b> | $k_{\text{H}}$ ([M]/min) | $k_{\text{D}}$ ([M]/min) | $k_{\text{H}}/k_{\text{D}}$ |
|--------------------|------------|-------------------|-------------------|--------------------------|--------------------------|-----------------------------|
| 1                  | 60         | 20.0              | 6.7               | $3.3 \times 10^{-4}$     | $1.1 \times 10^{-4}$     | 2.99                        |
| 2                  | 60         | 19.0              | 5.7               | $3.2 \times 10^{-4}$     | $9.5 \times 10^{-5}$     | 3.33                        |
| 3                  | 60         | 18.4              | 5.7               | $3.3 \times 10^{-4}$     | $9.5 \times 10^{-5}$     | 3.23                        |
| Average            |            |                   |                   |                          |                          | 3.18                        |

<sup>a</sup> The conversion was determined by <sup>1</sup>H NMR analysis of the crude reaction mixture, as discussed in the preceding section.

### Results from the reversibility experiments of 5:

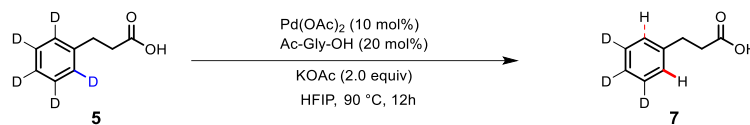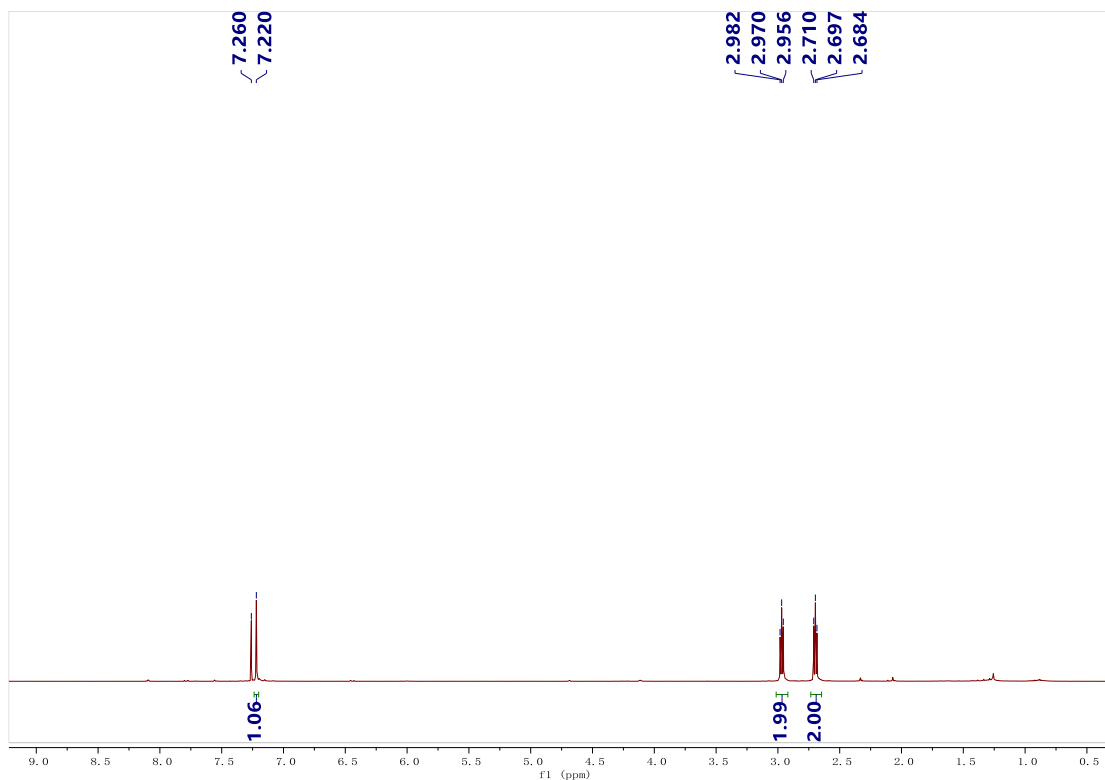

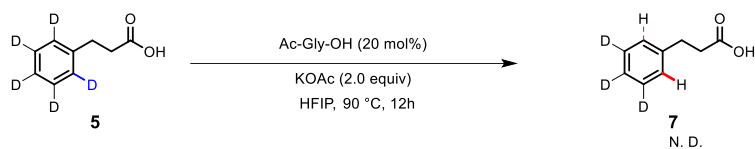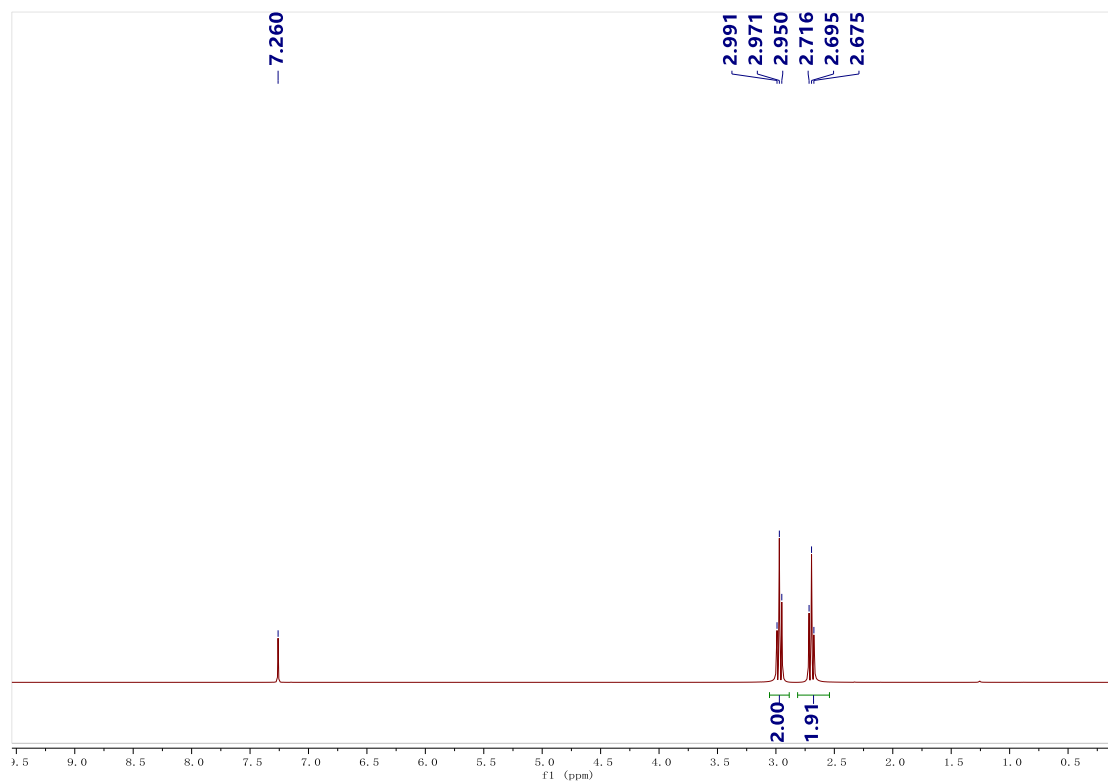

### 3. References

<sup>1</sup>H Daichao Xu; Chunxin Lu; Wanzhi Chen. *Tetrahedron Lett.* **2012**, 68, 1466.

## 4. NMR Spectra of Compounds

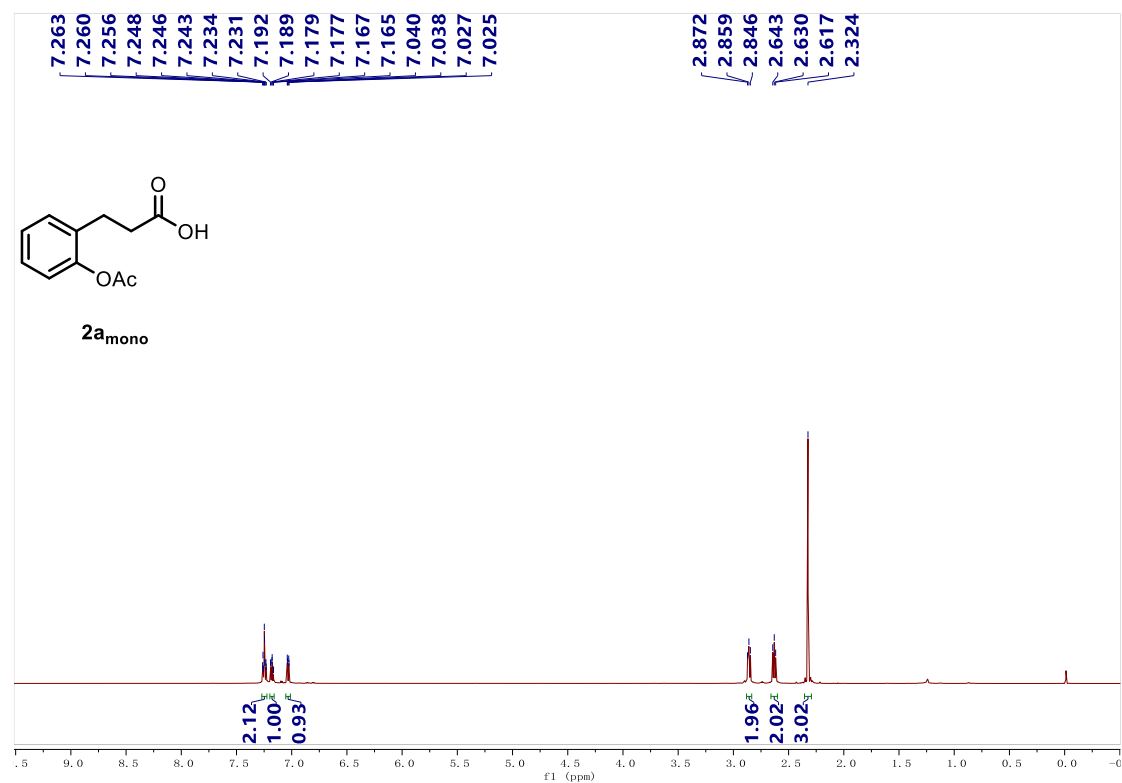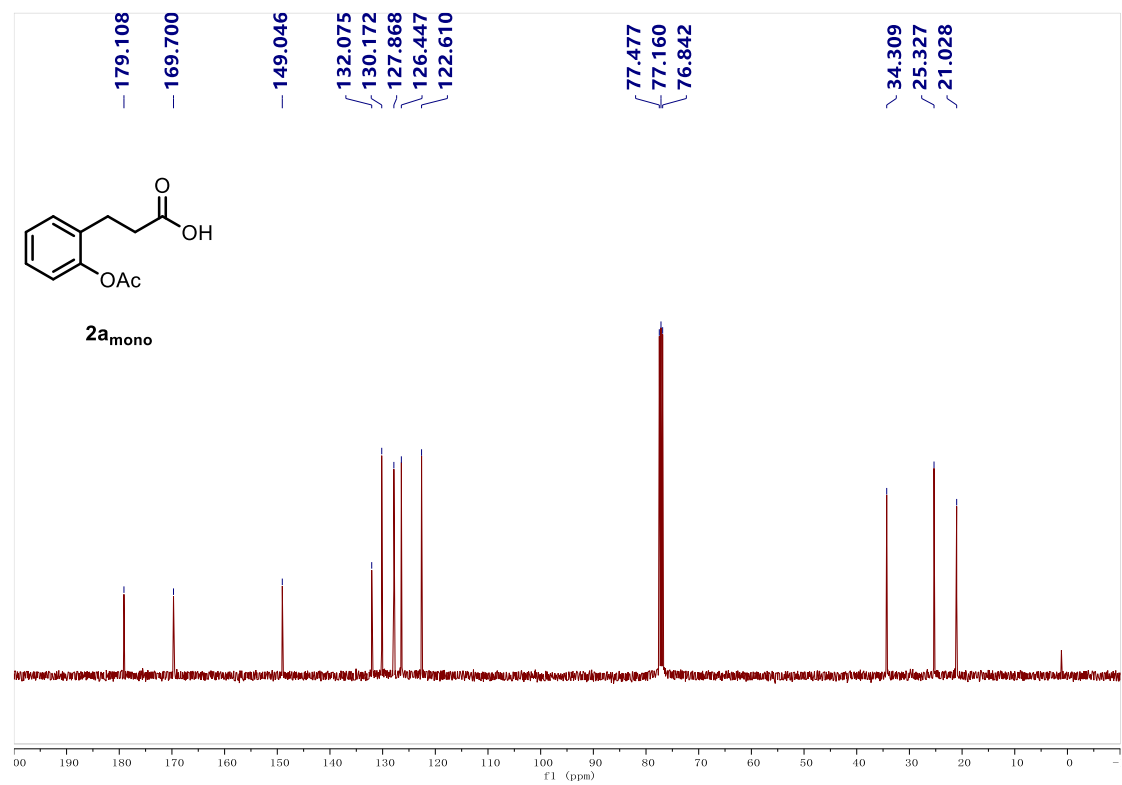

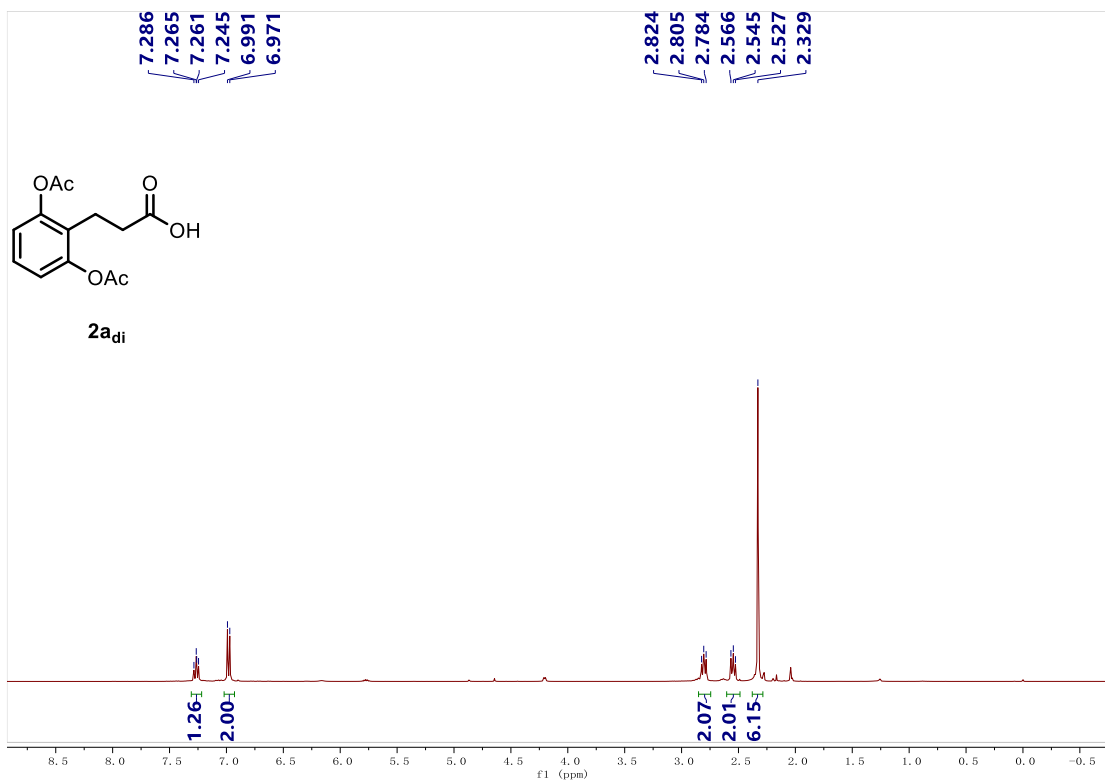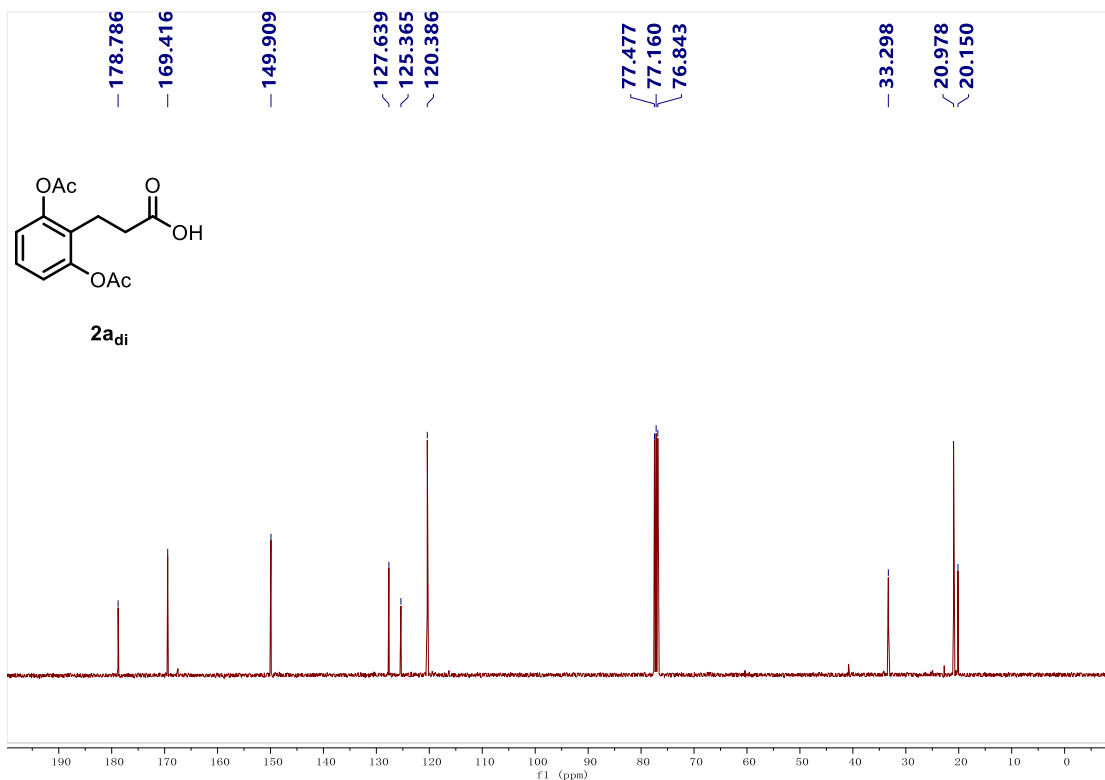

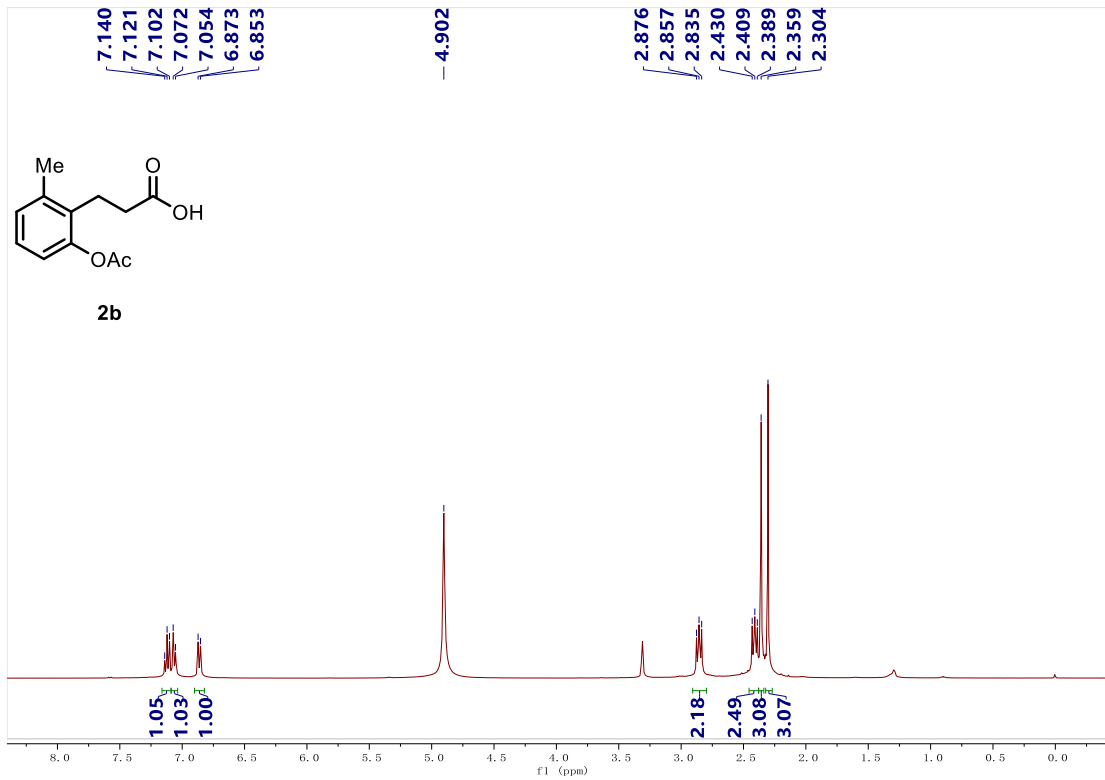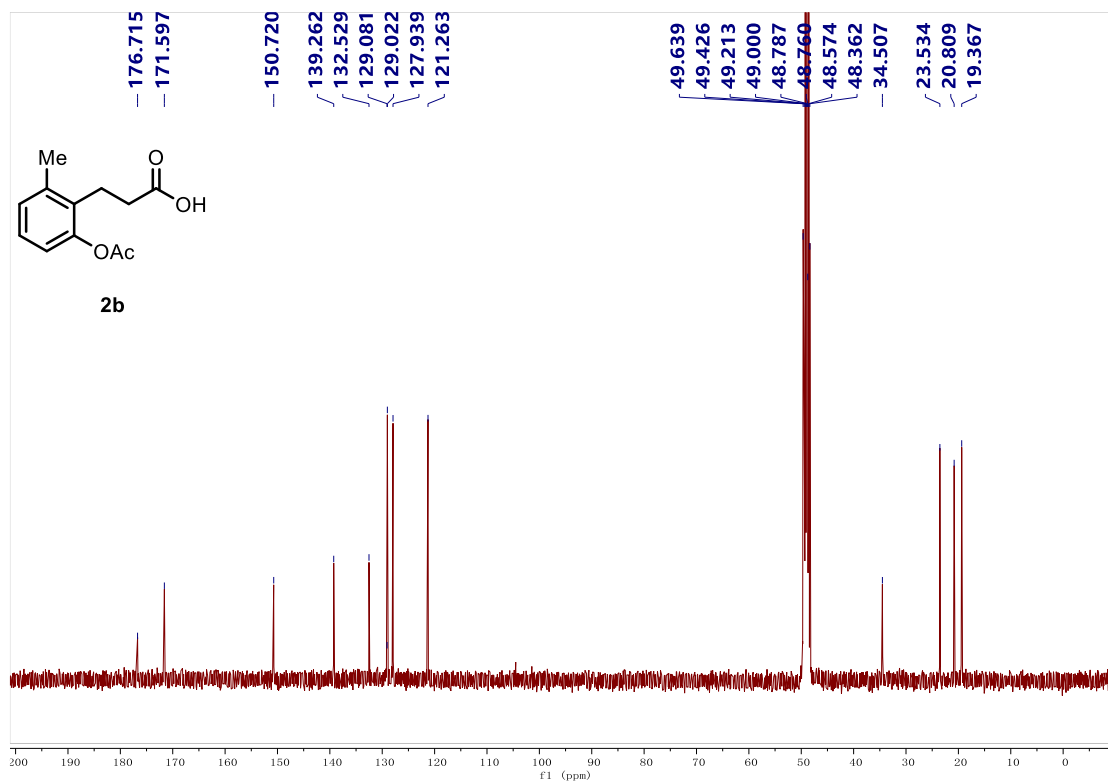

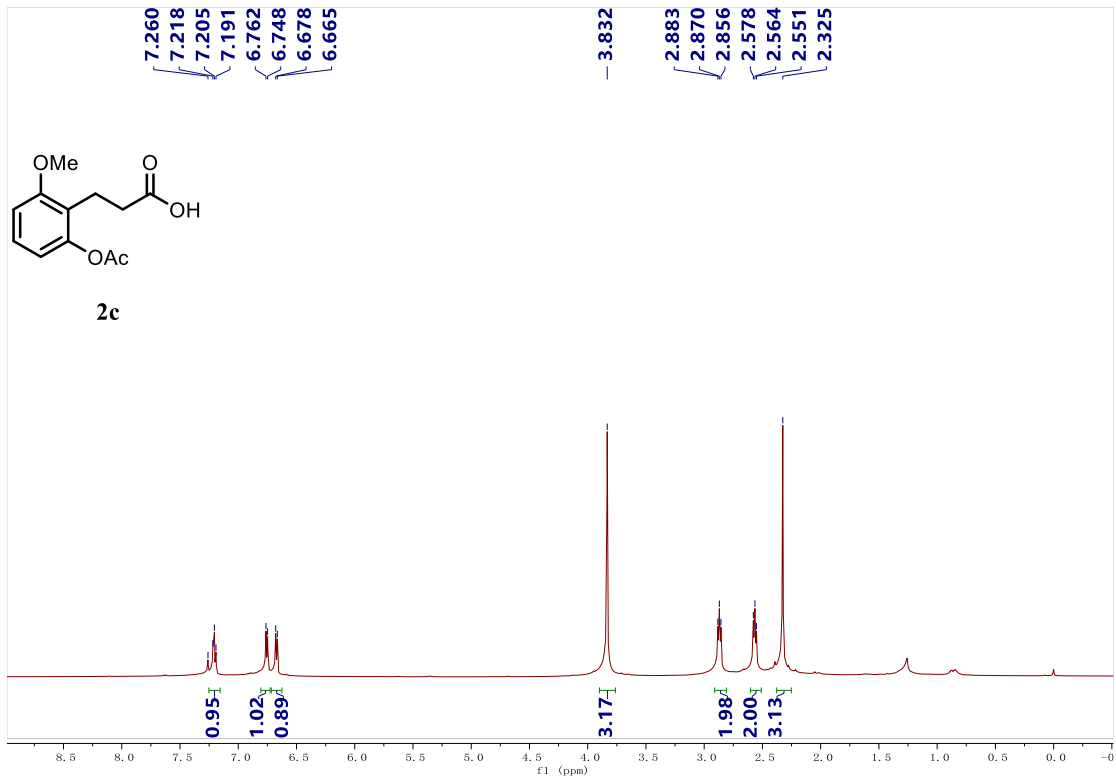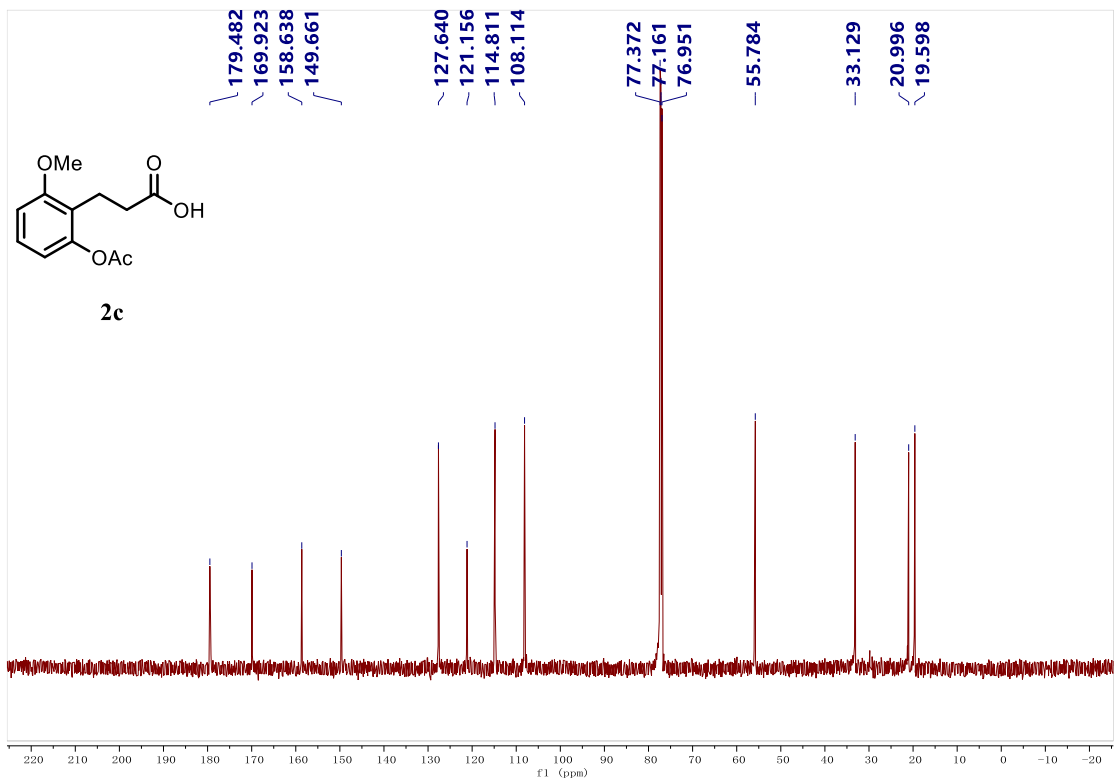

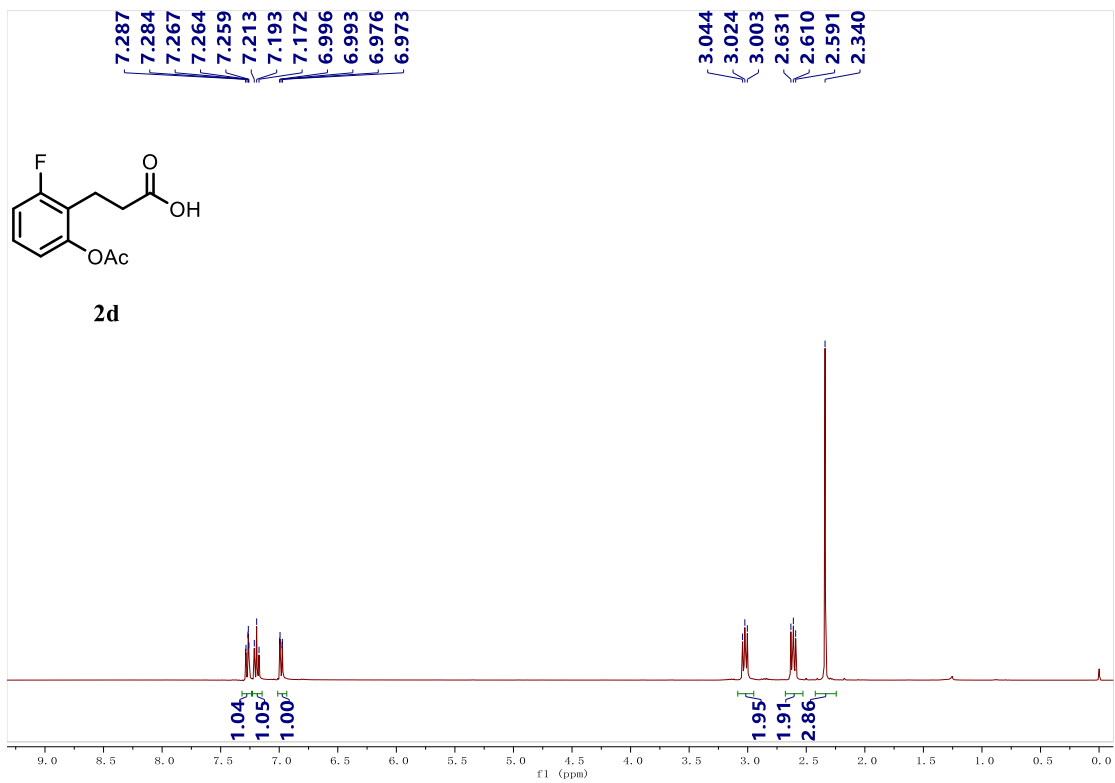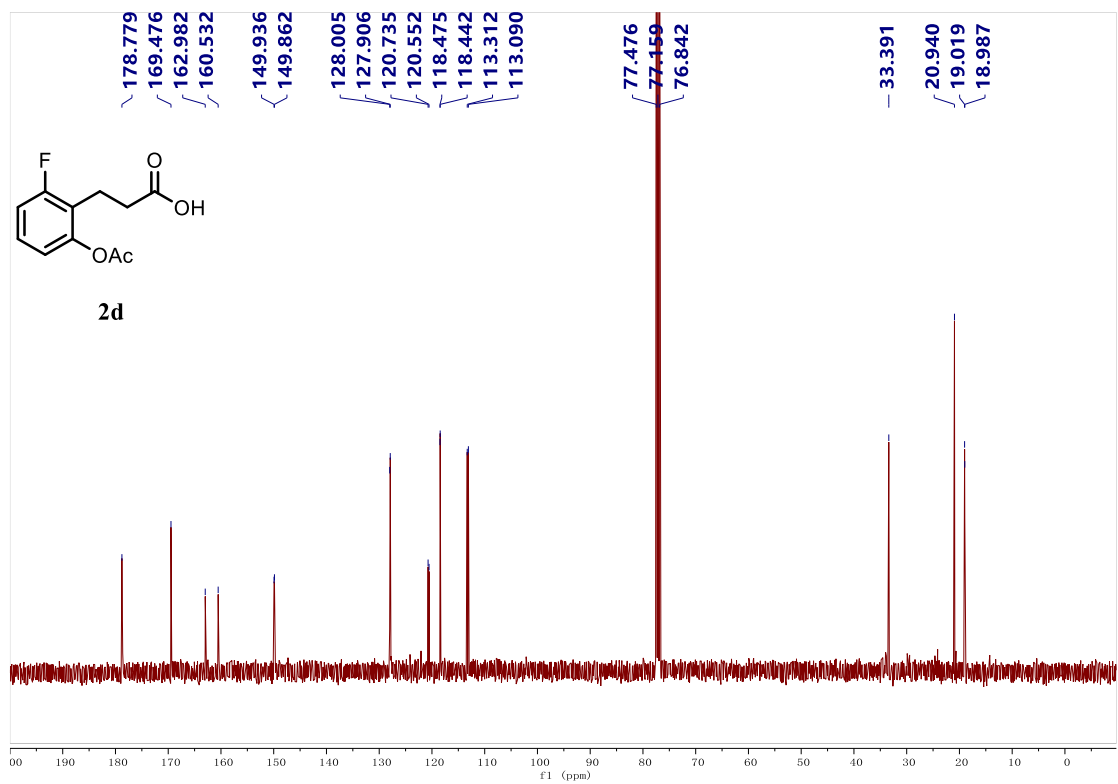

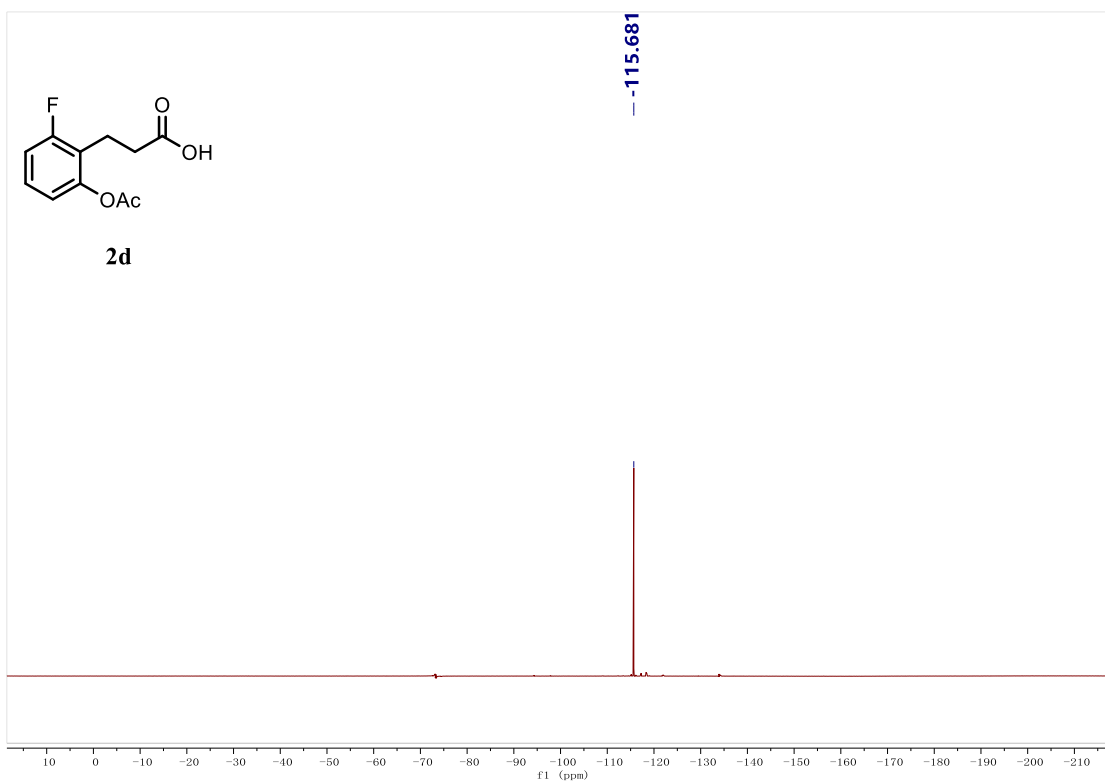



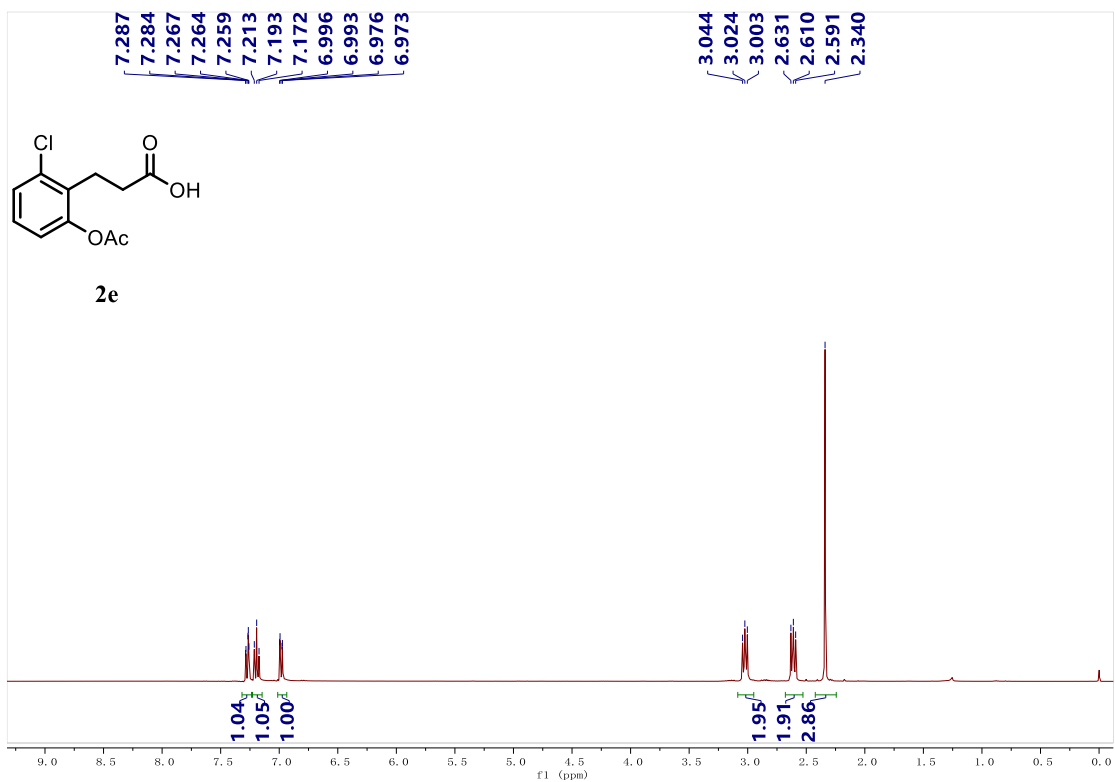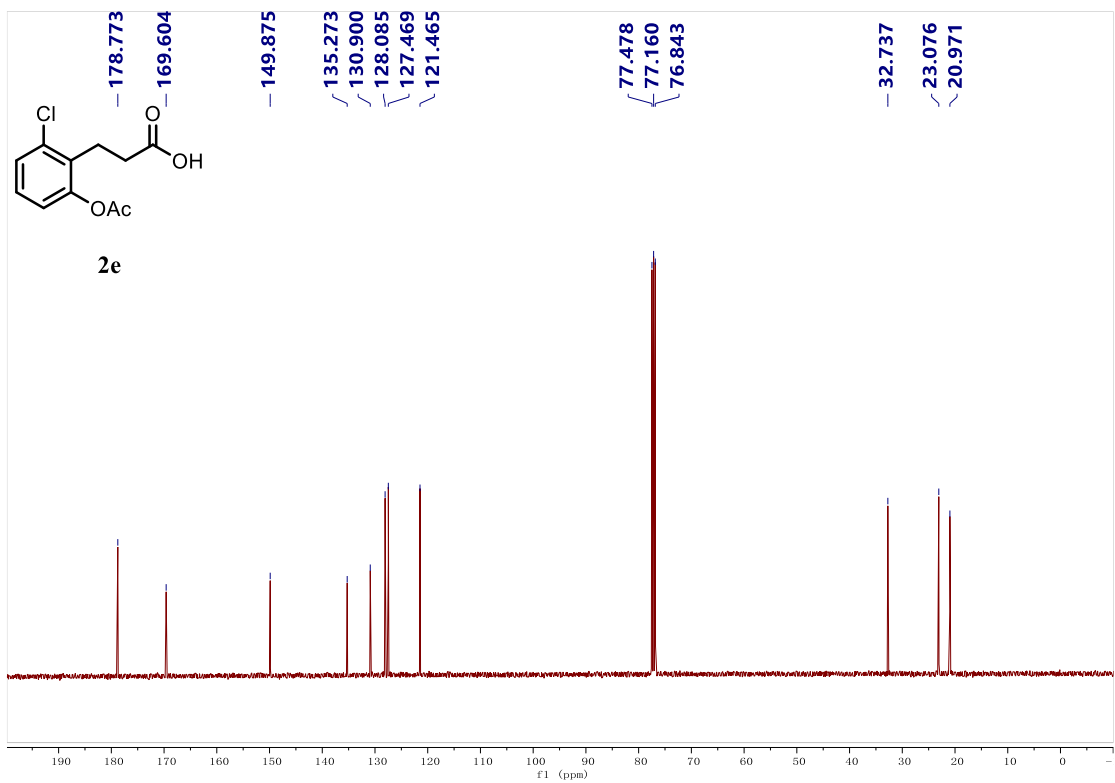

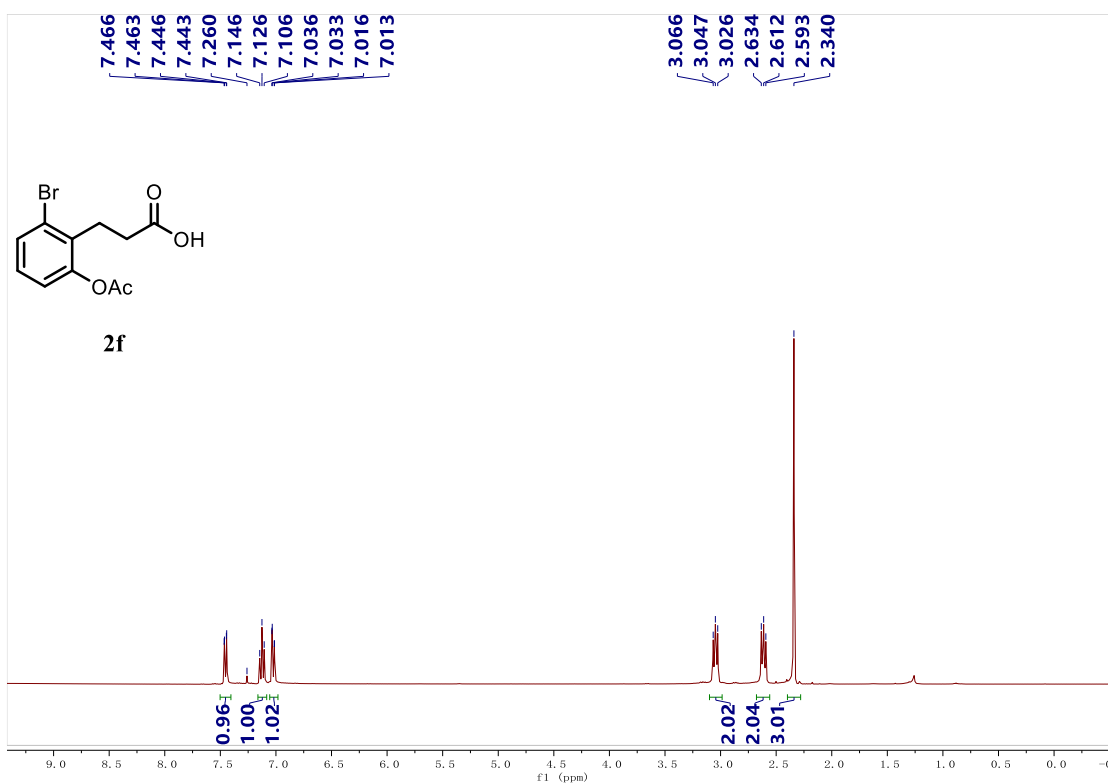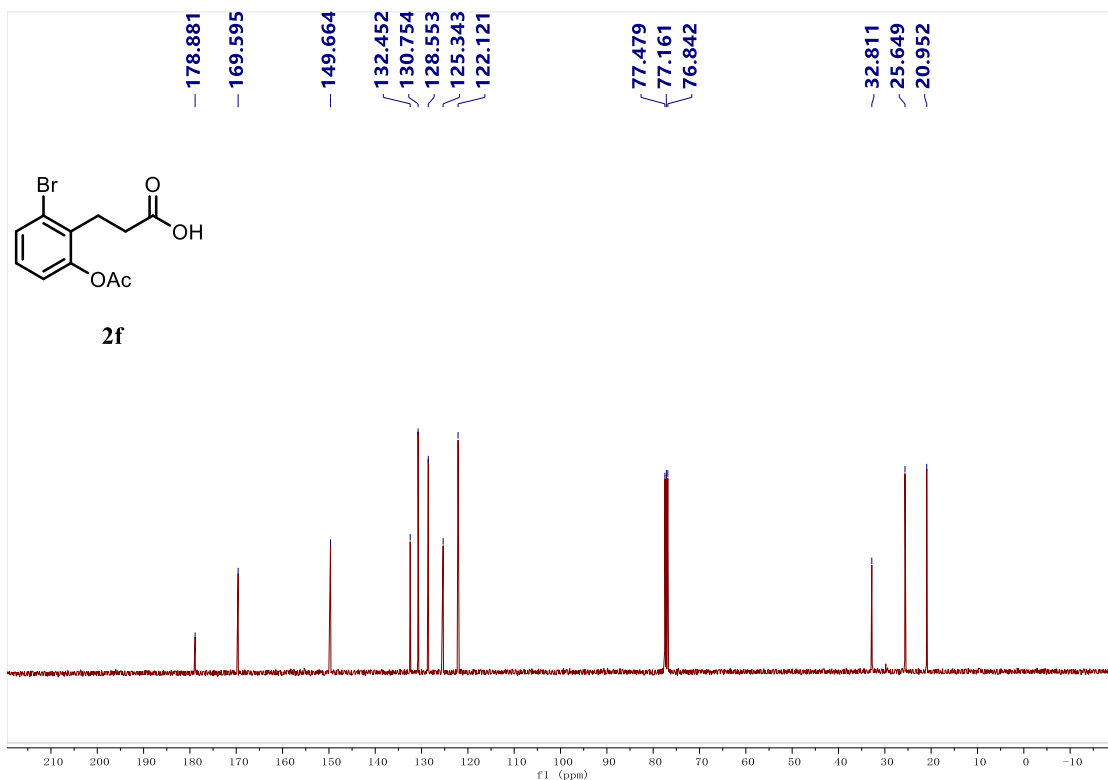

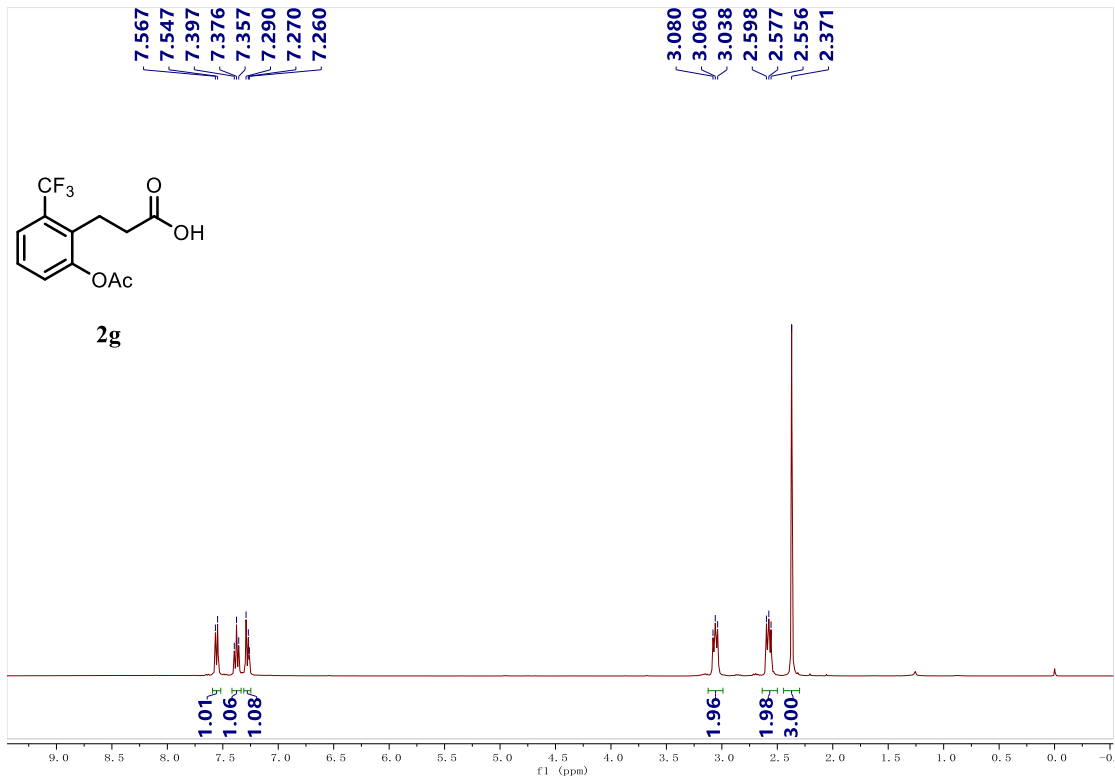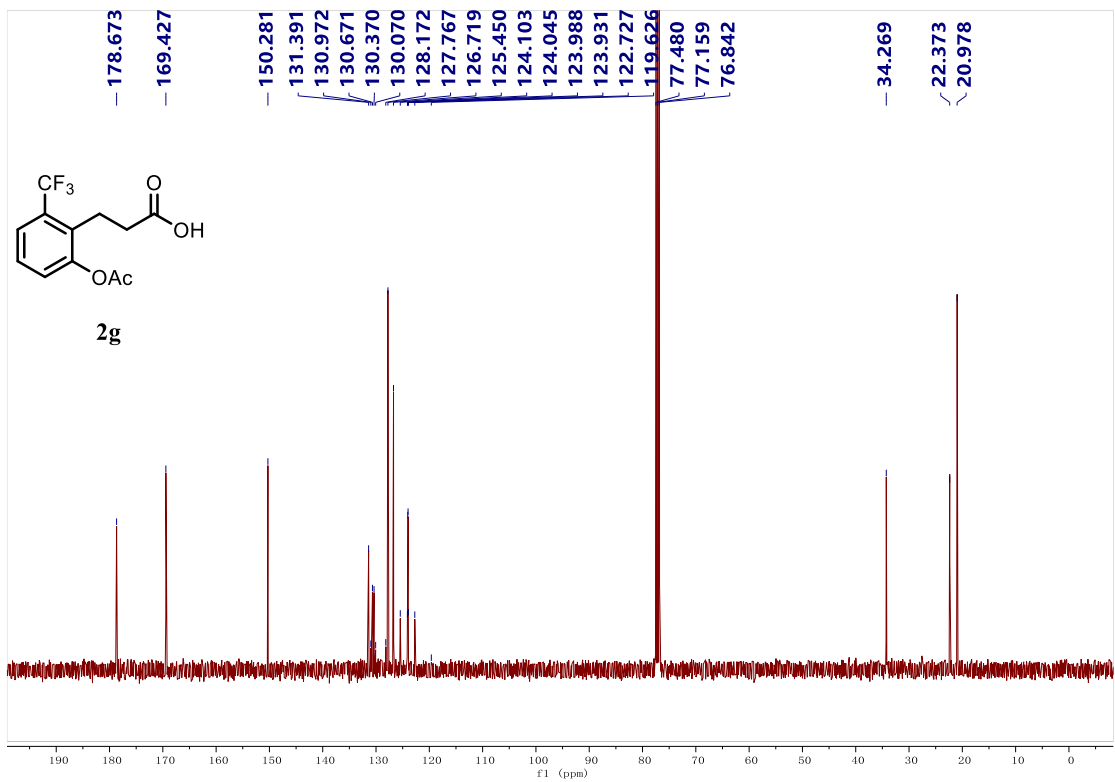

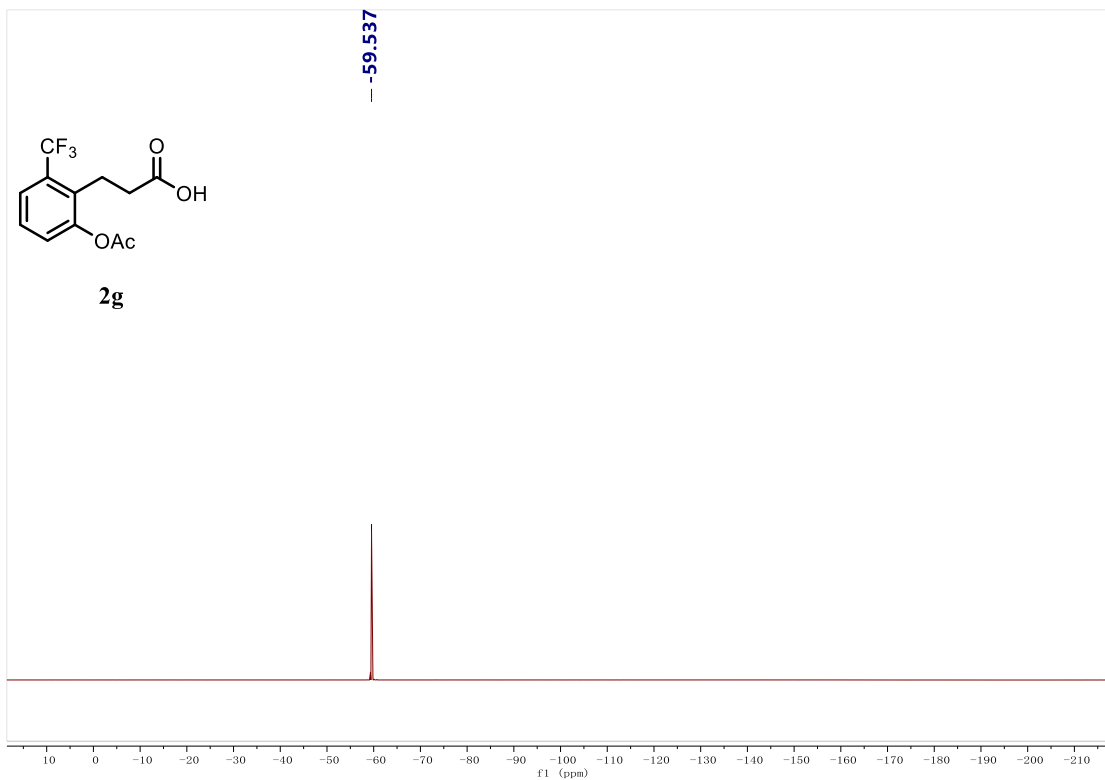

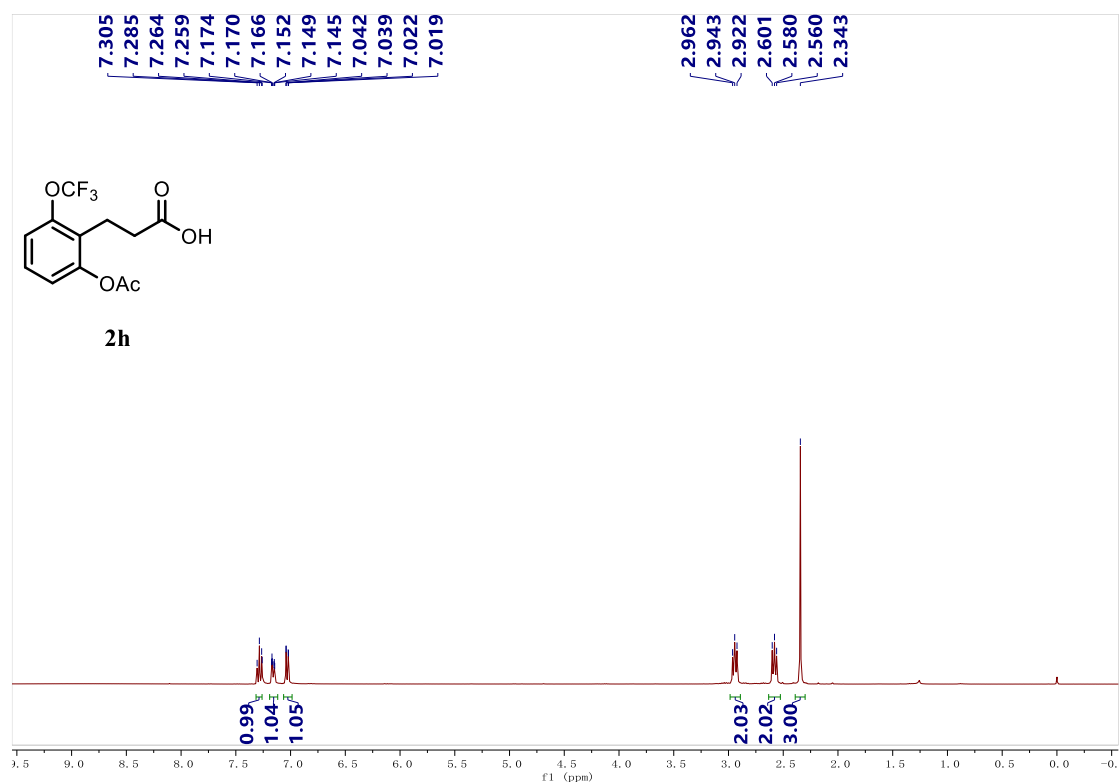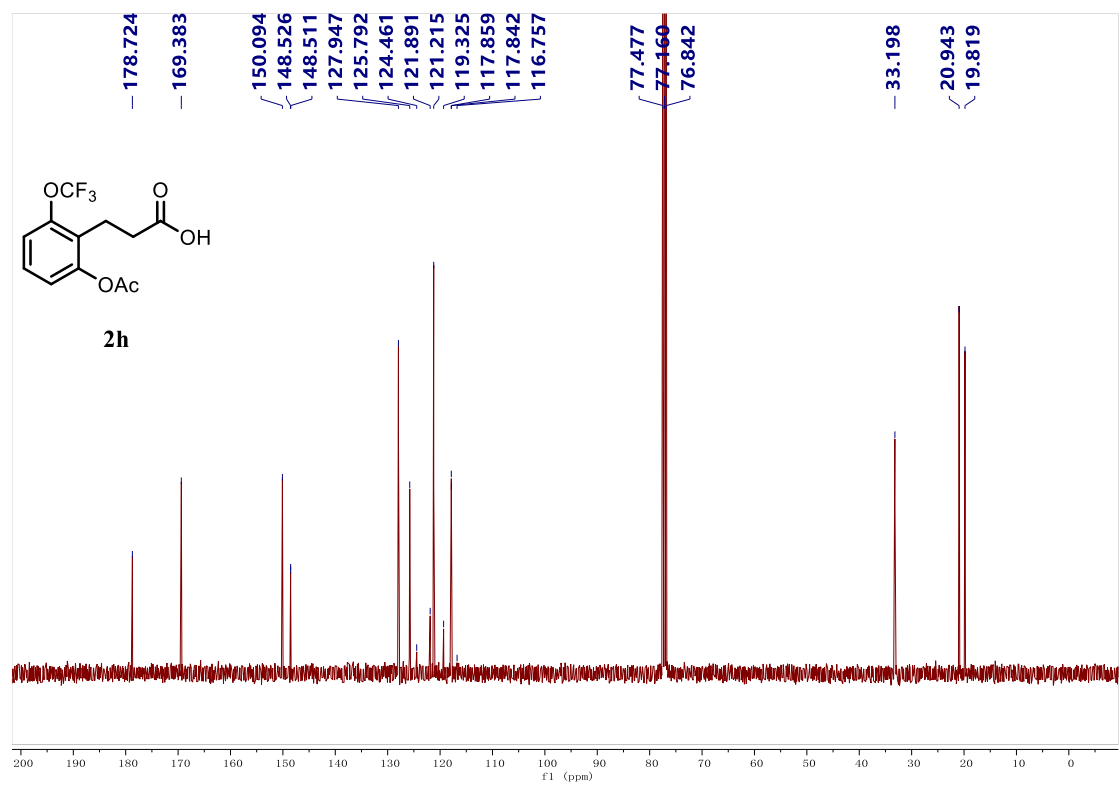

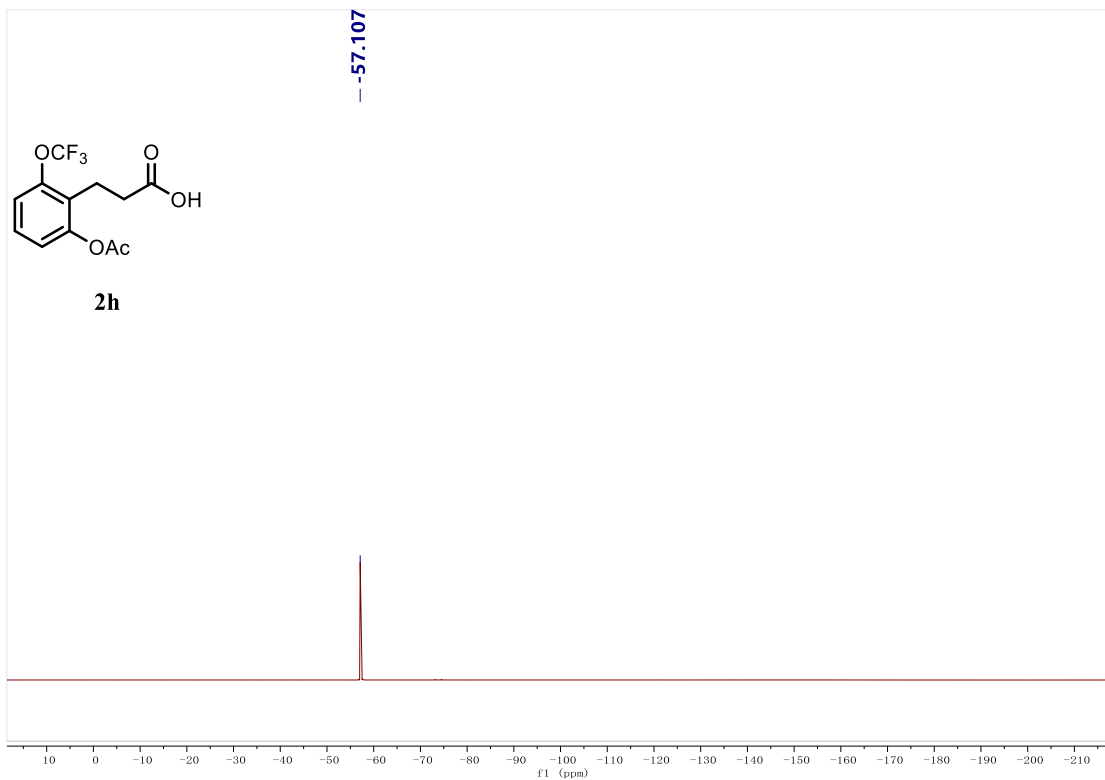

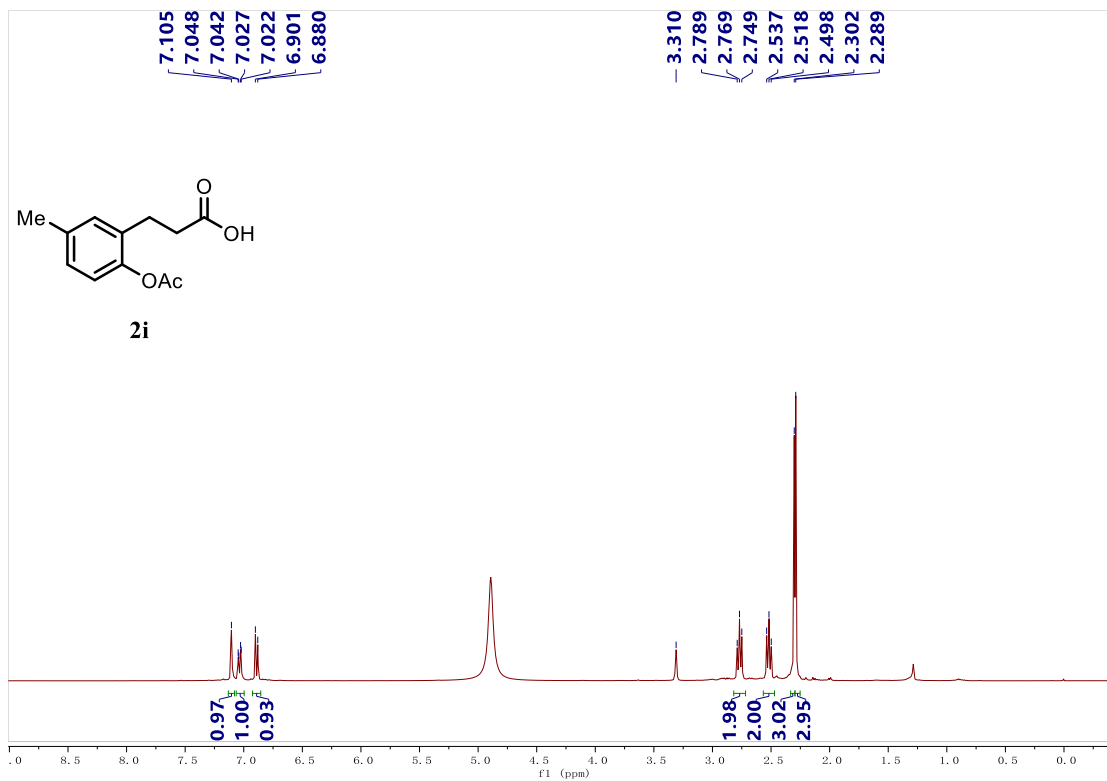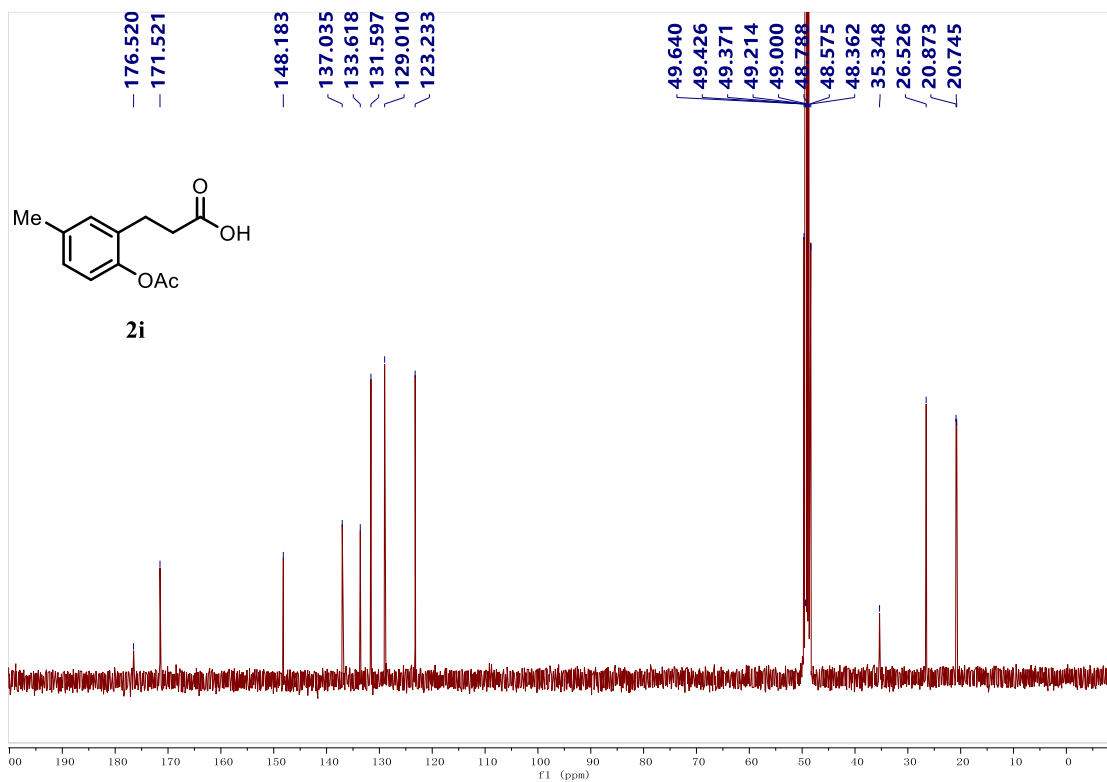

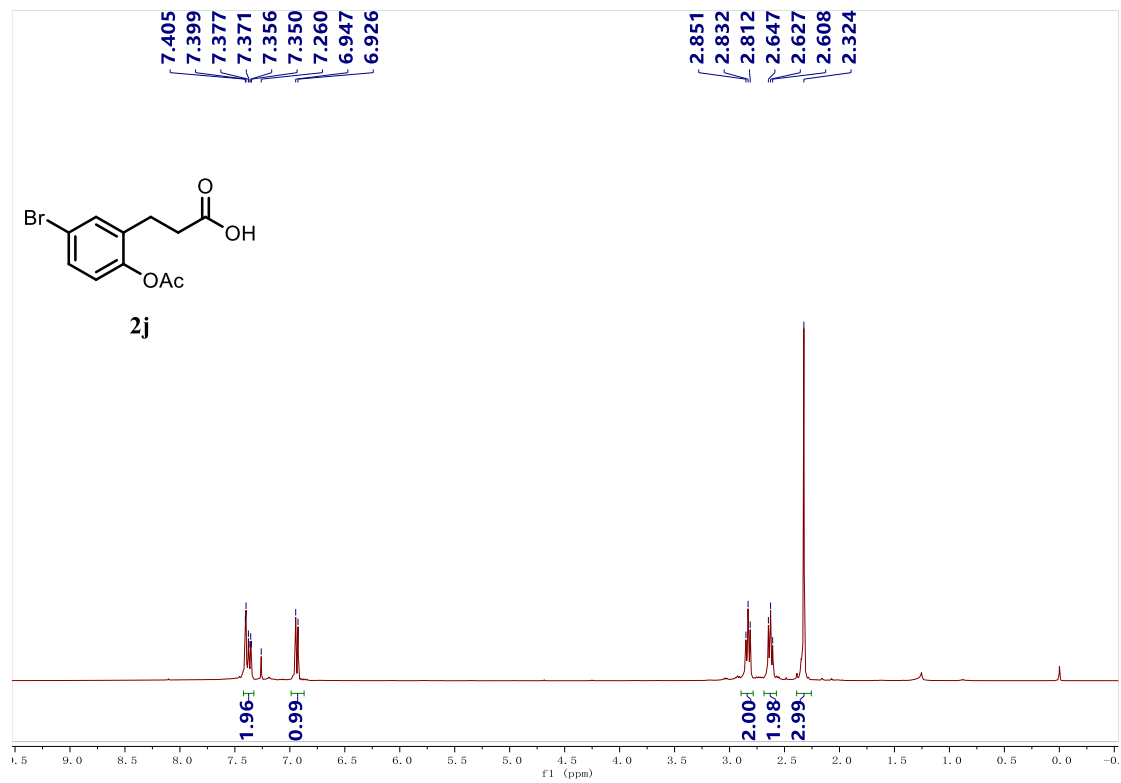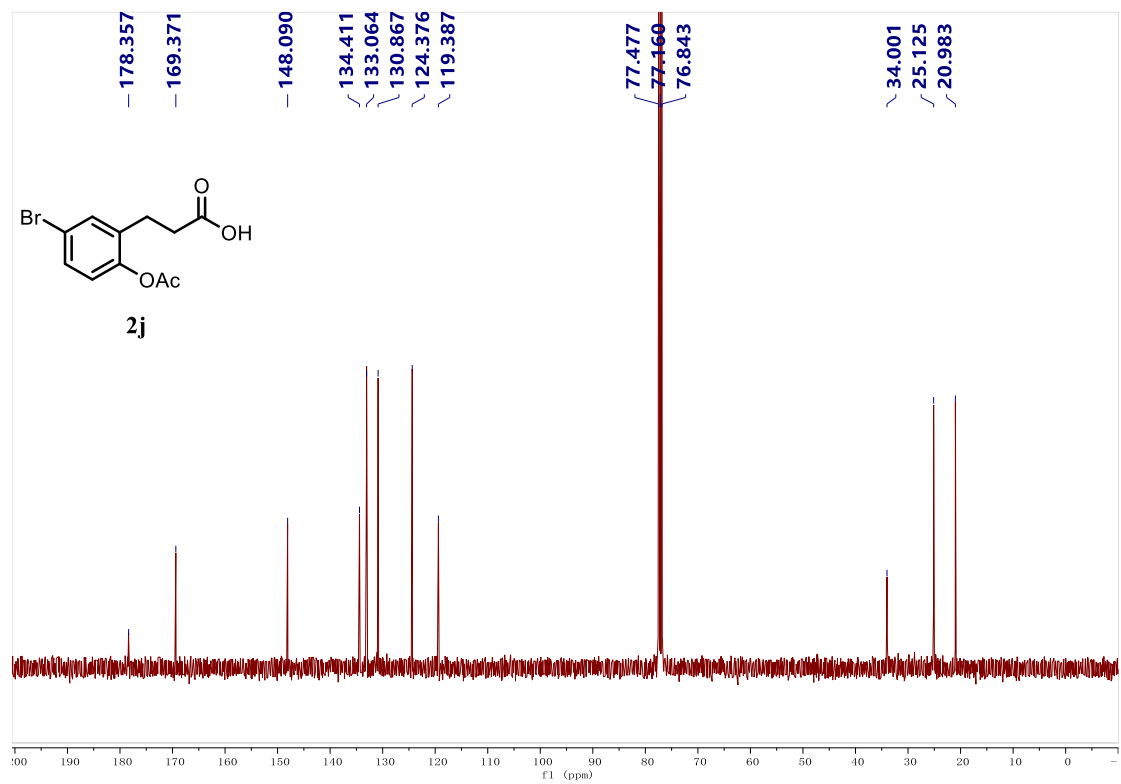



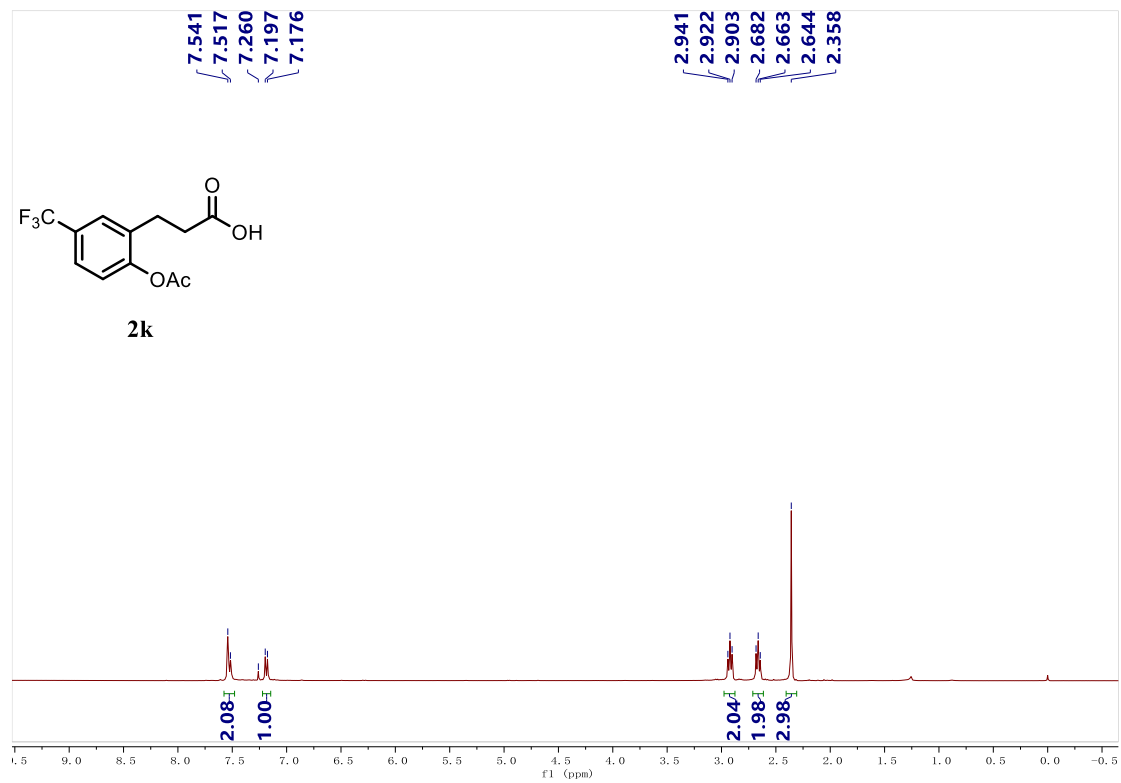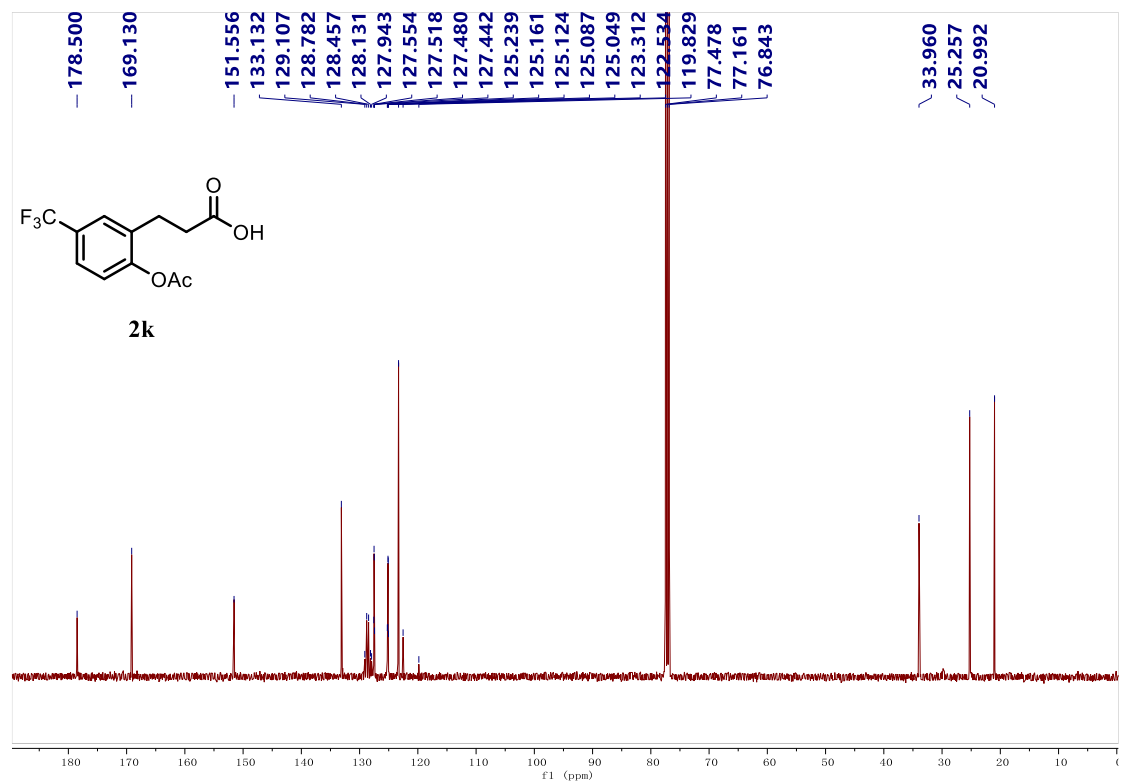

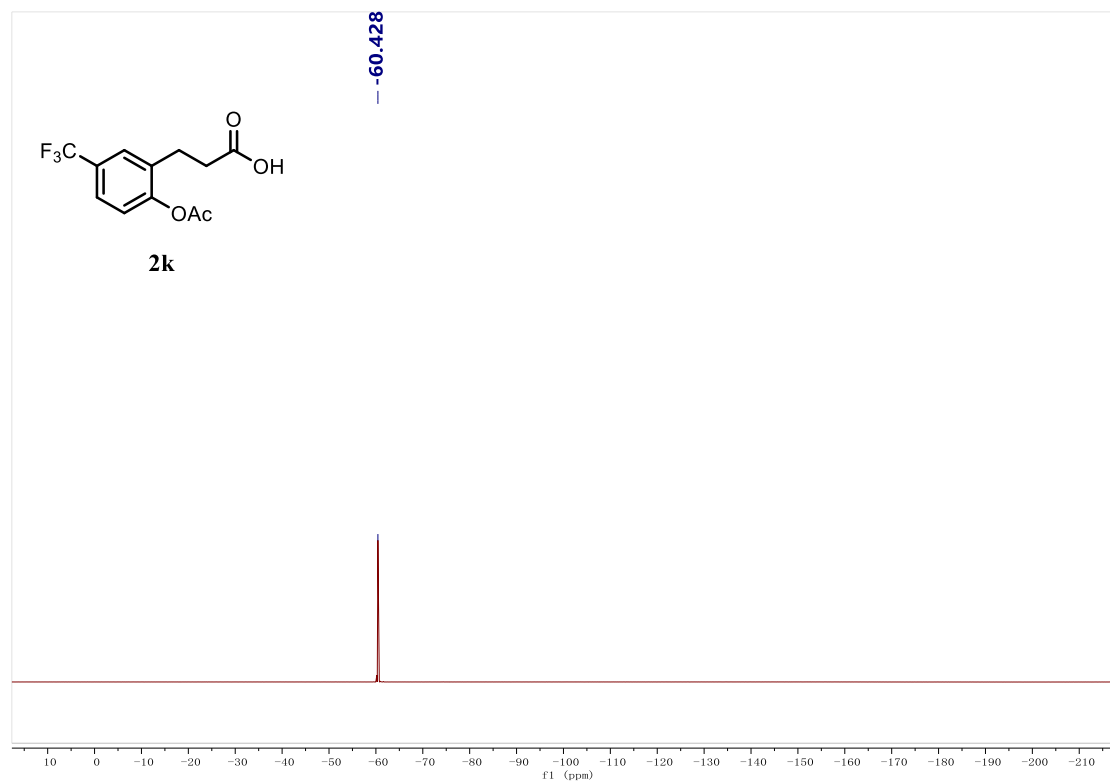

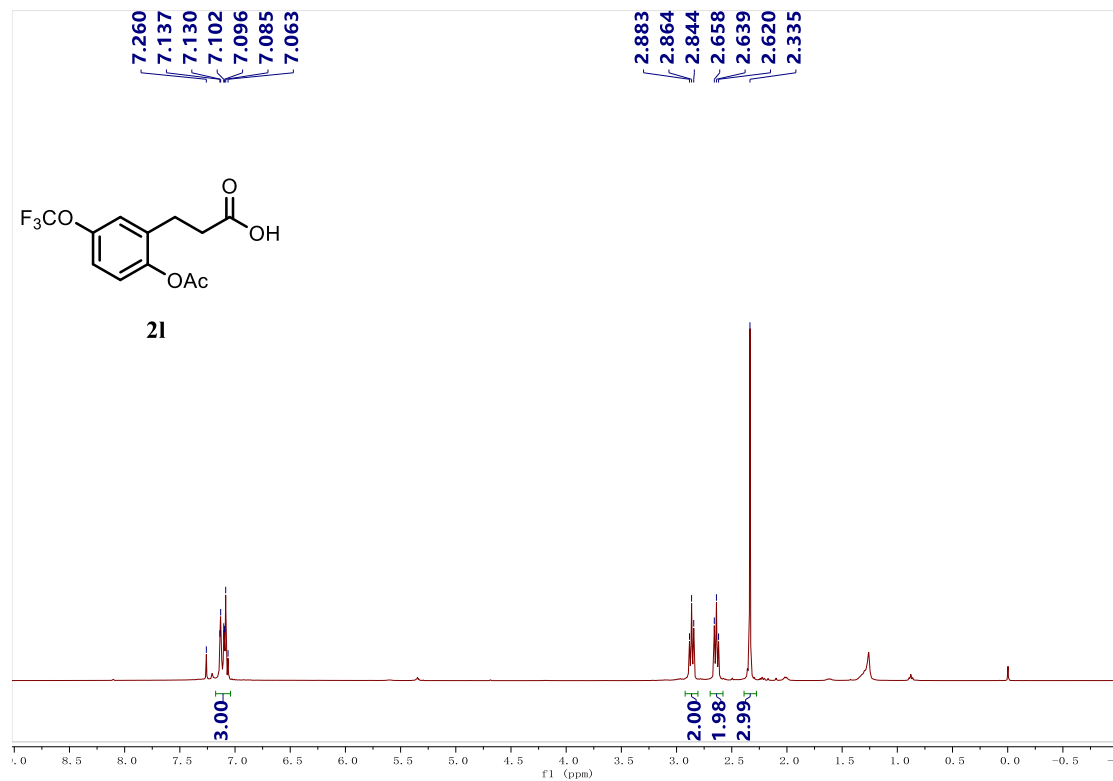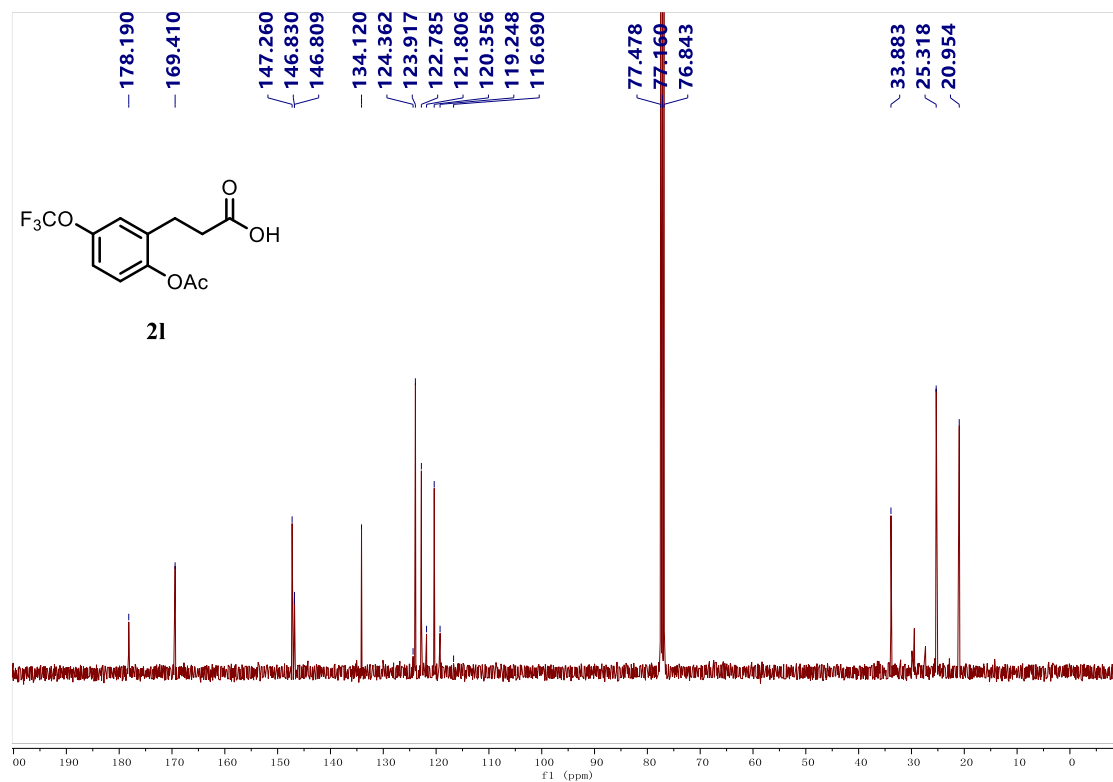

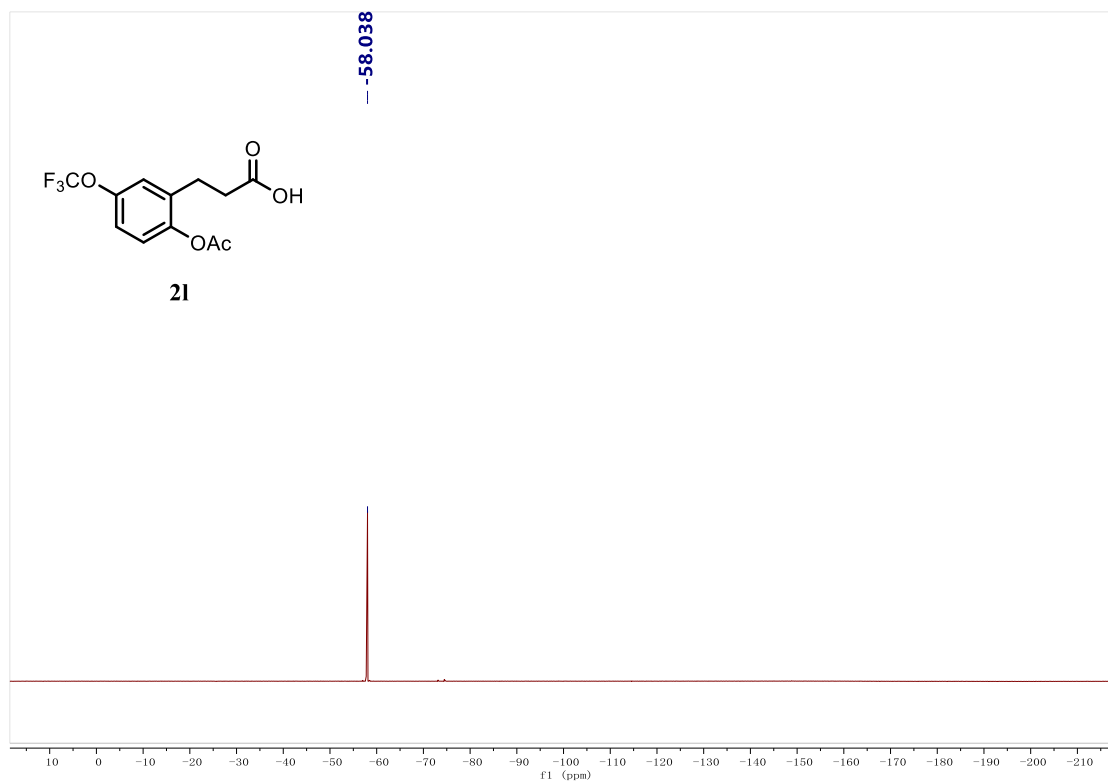

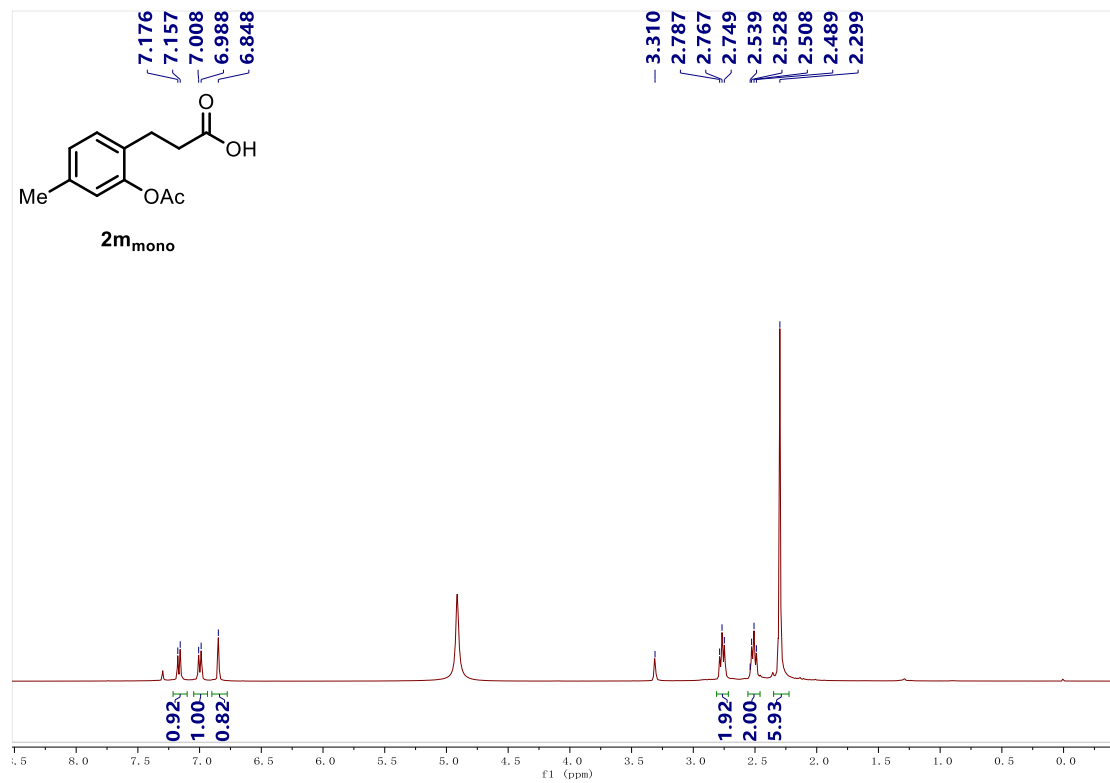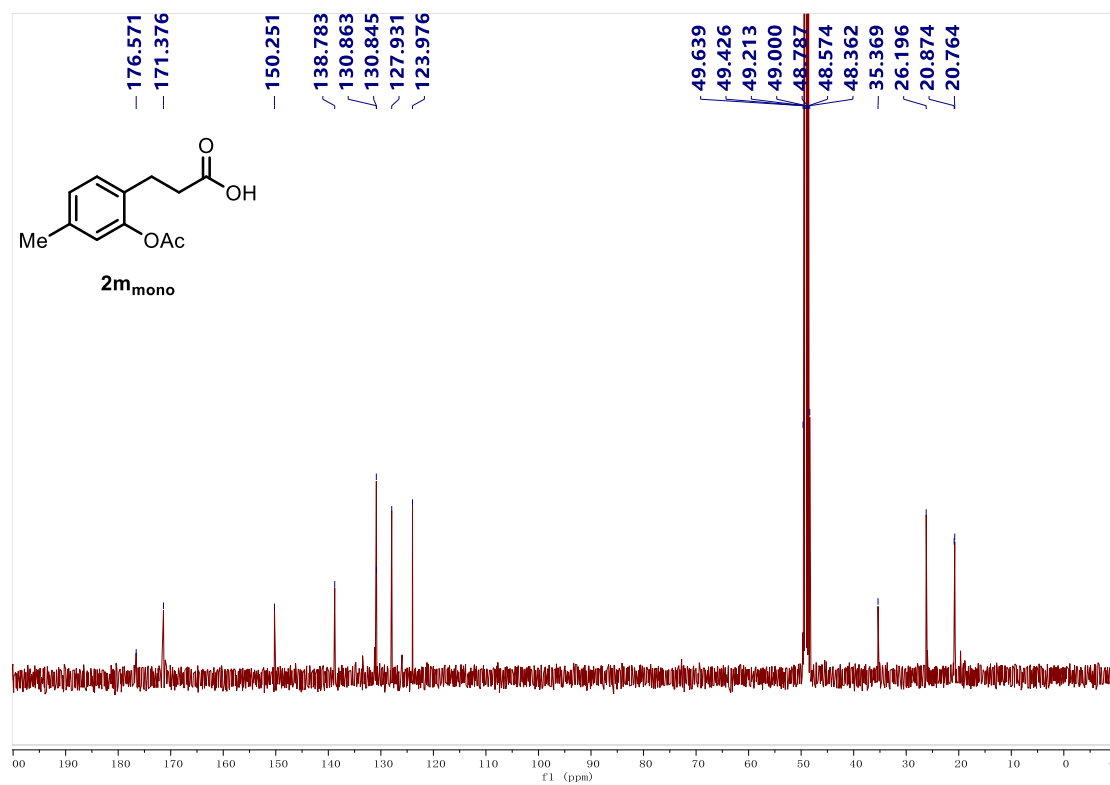

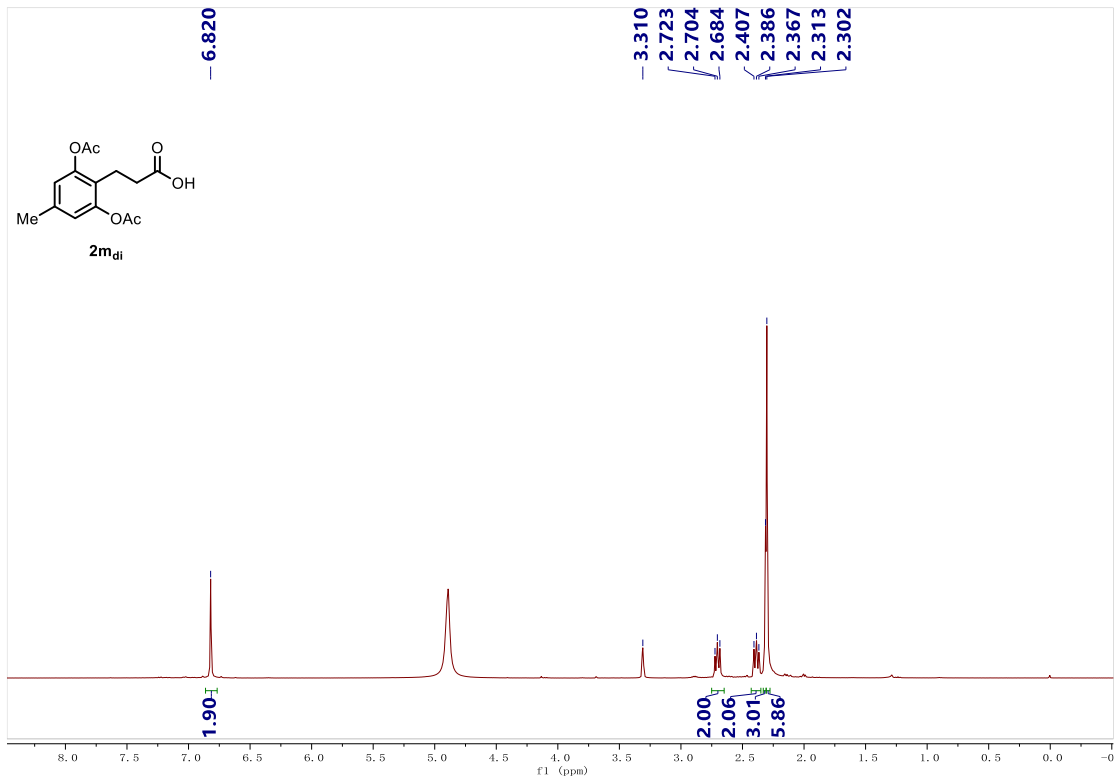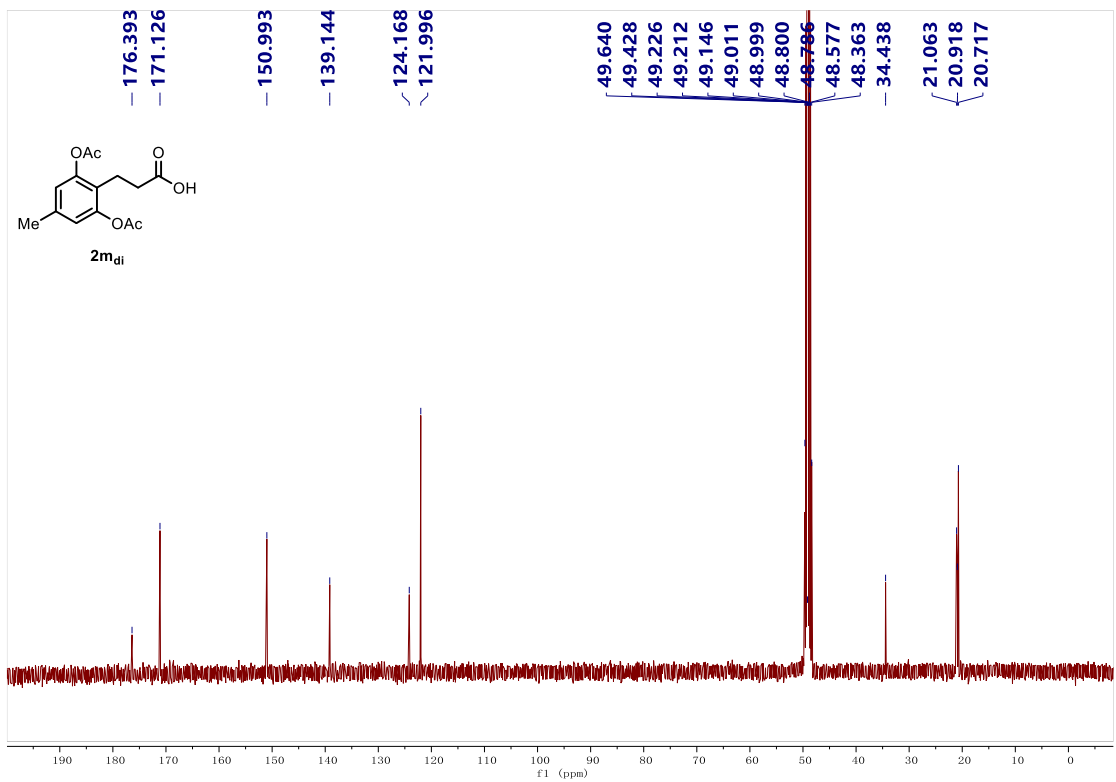

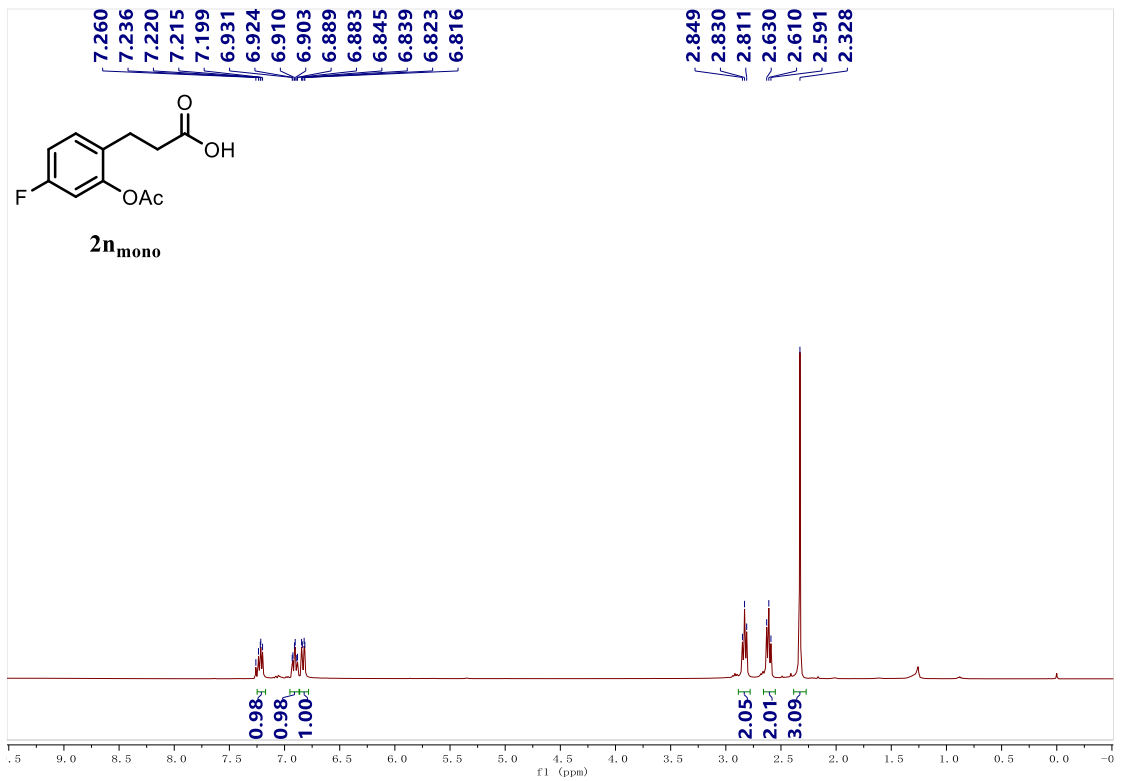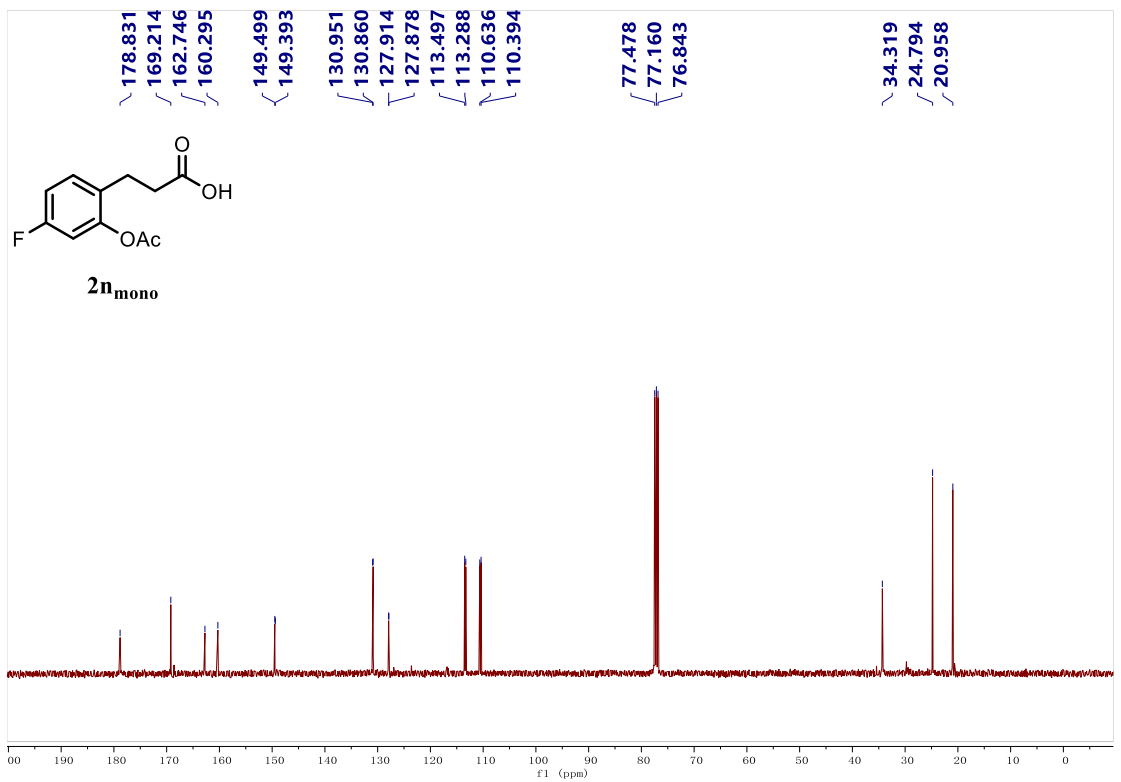

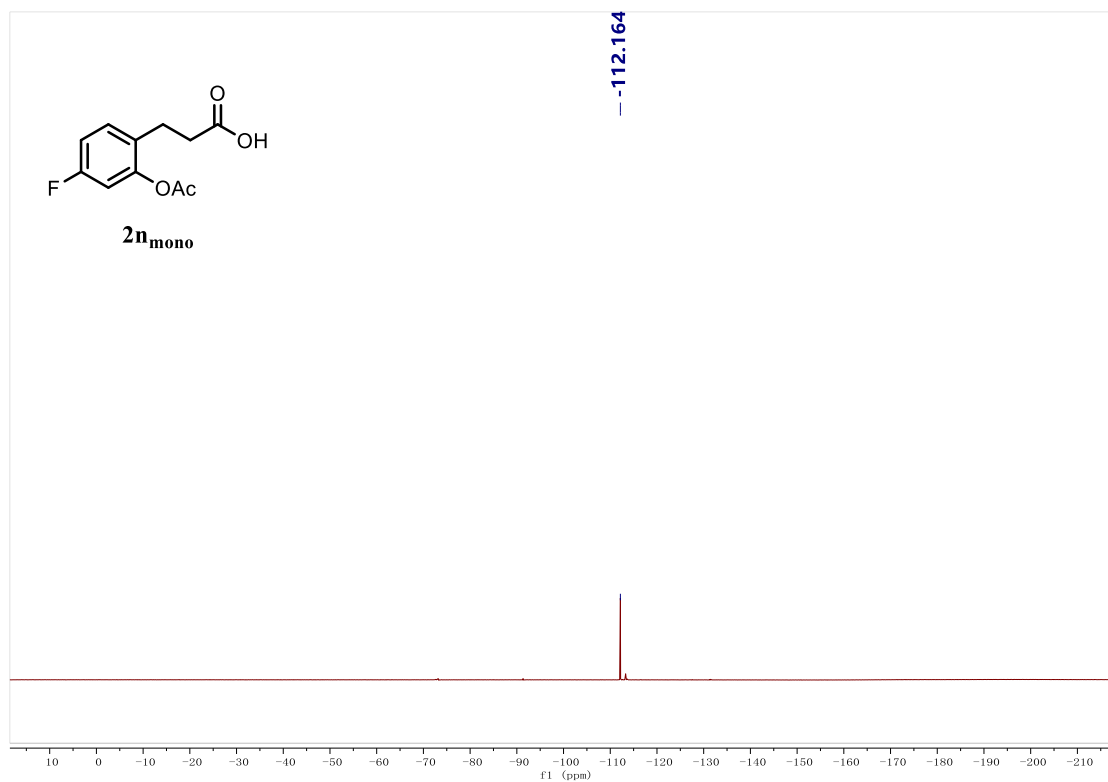



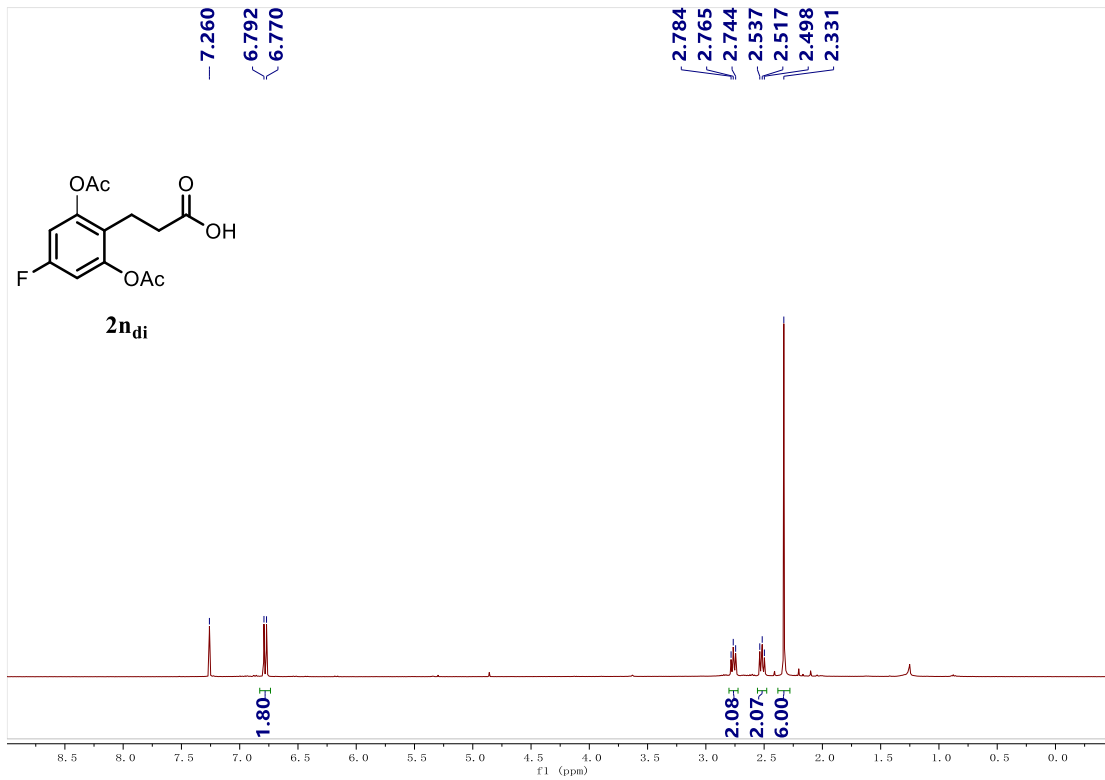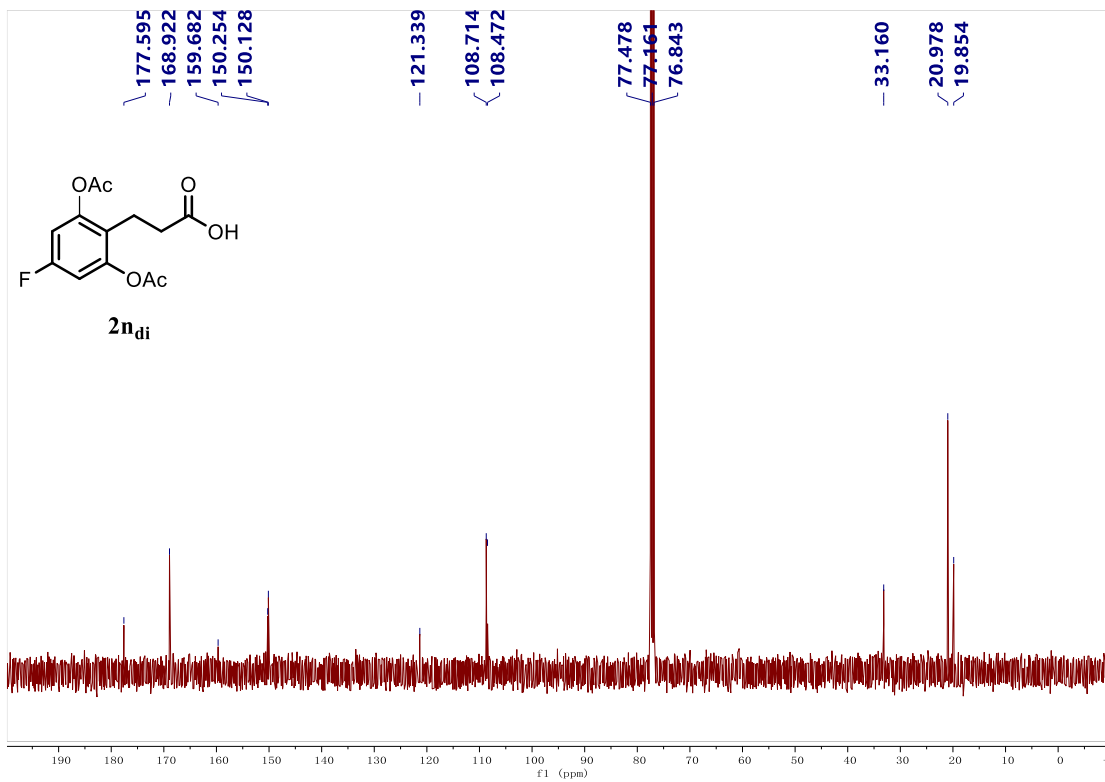

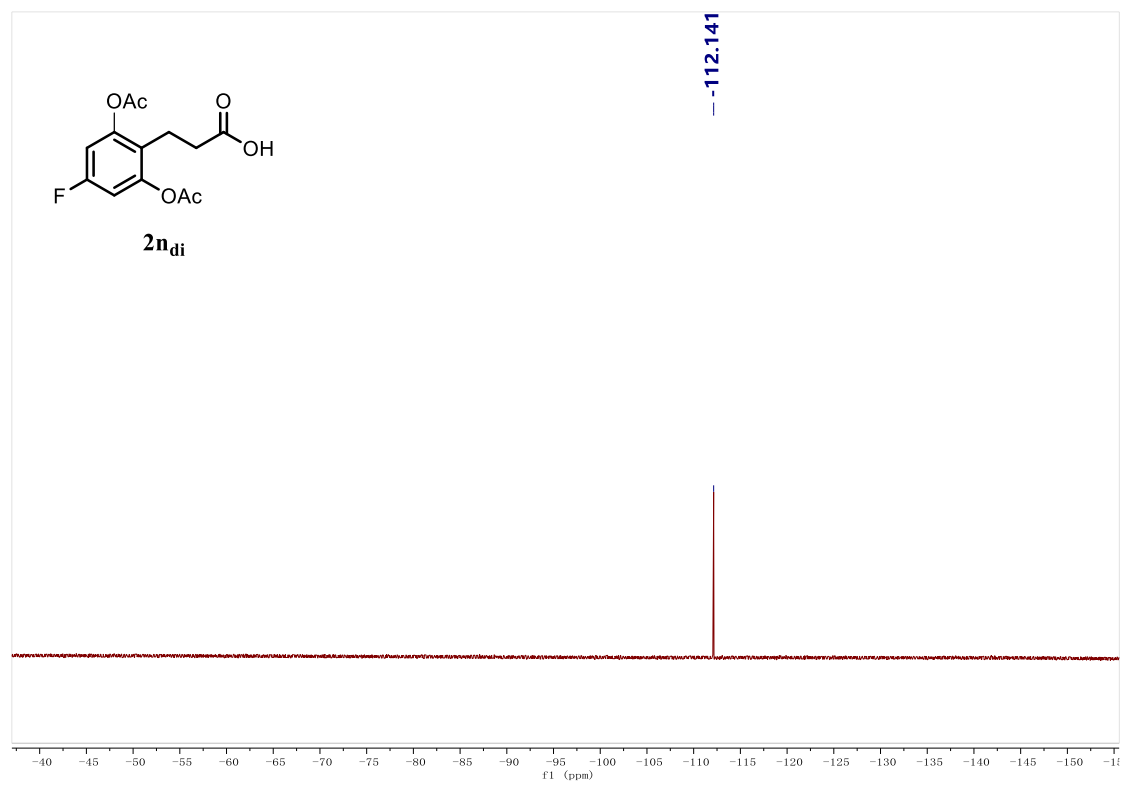

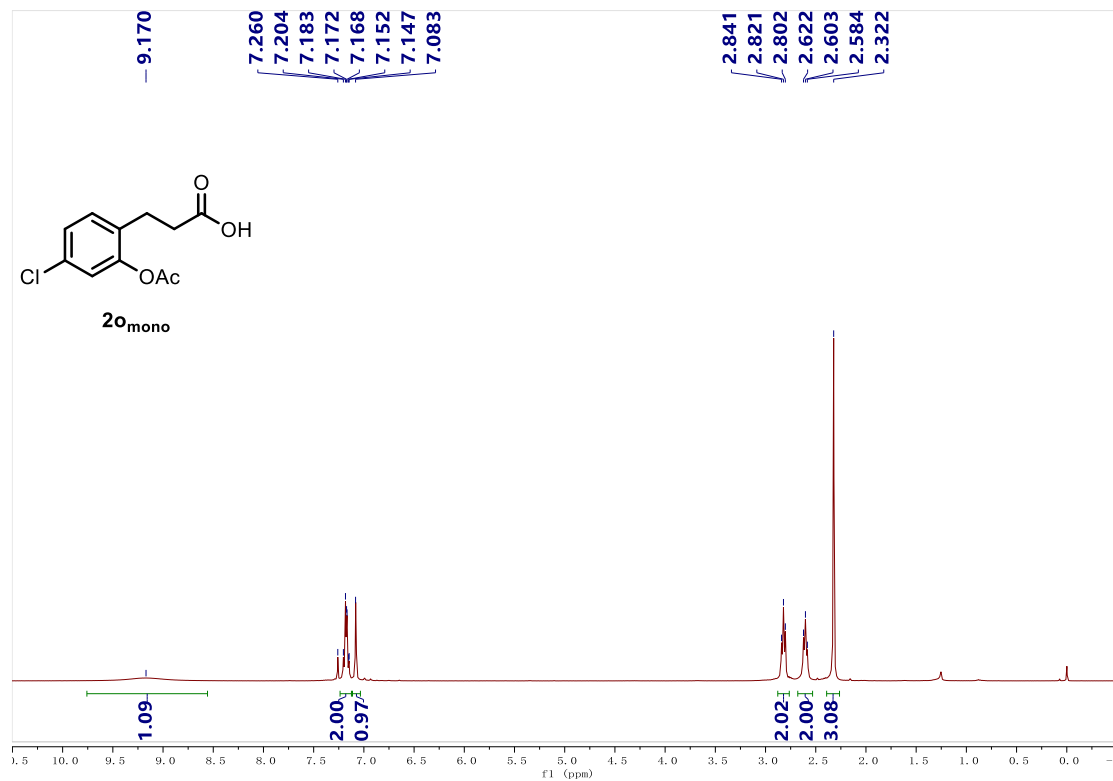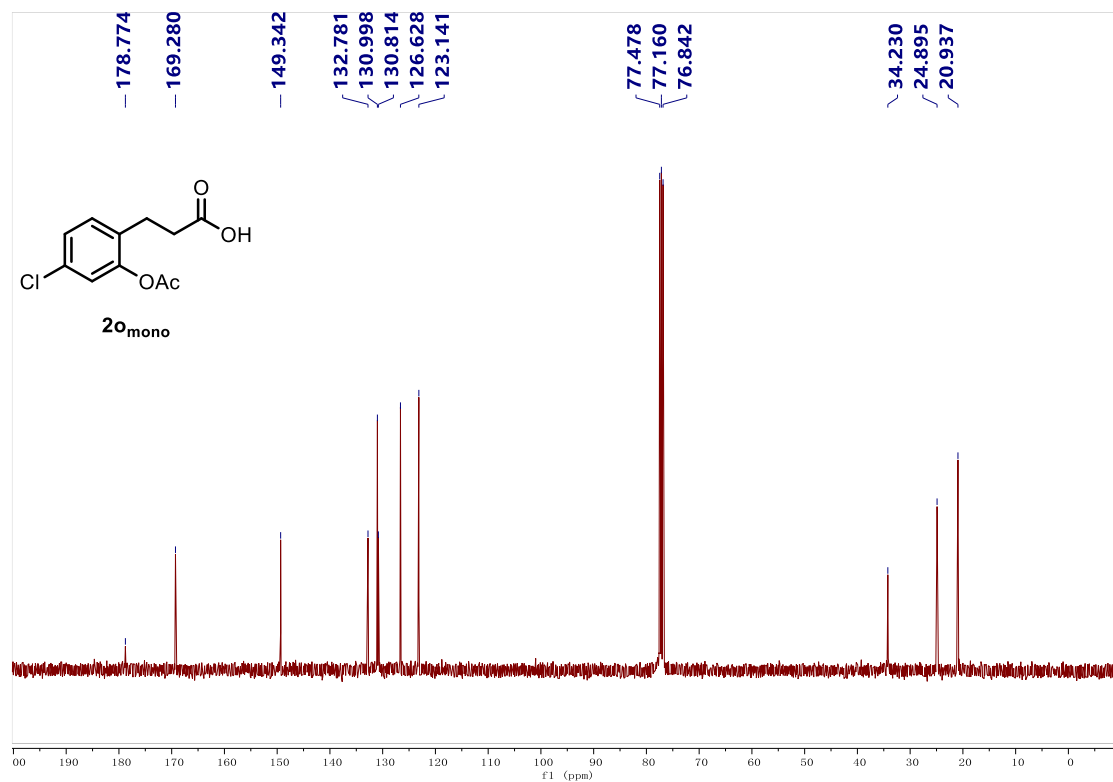

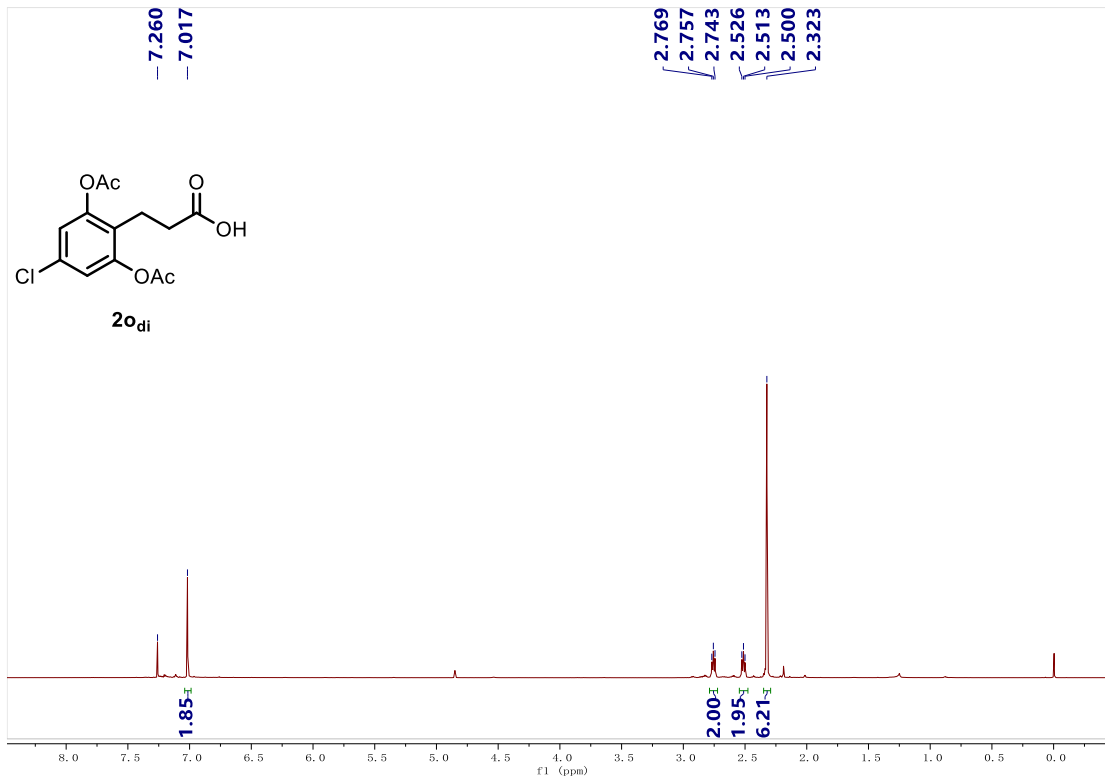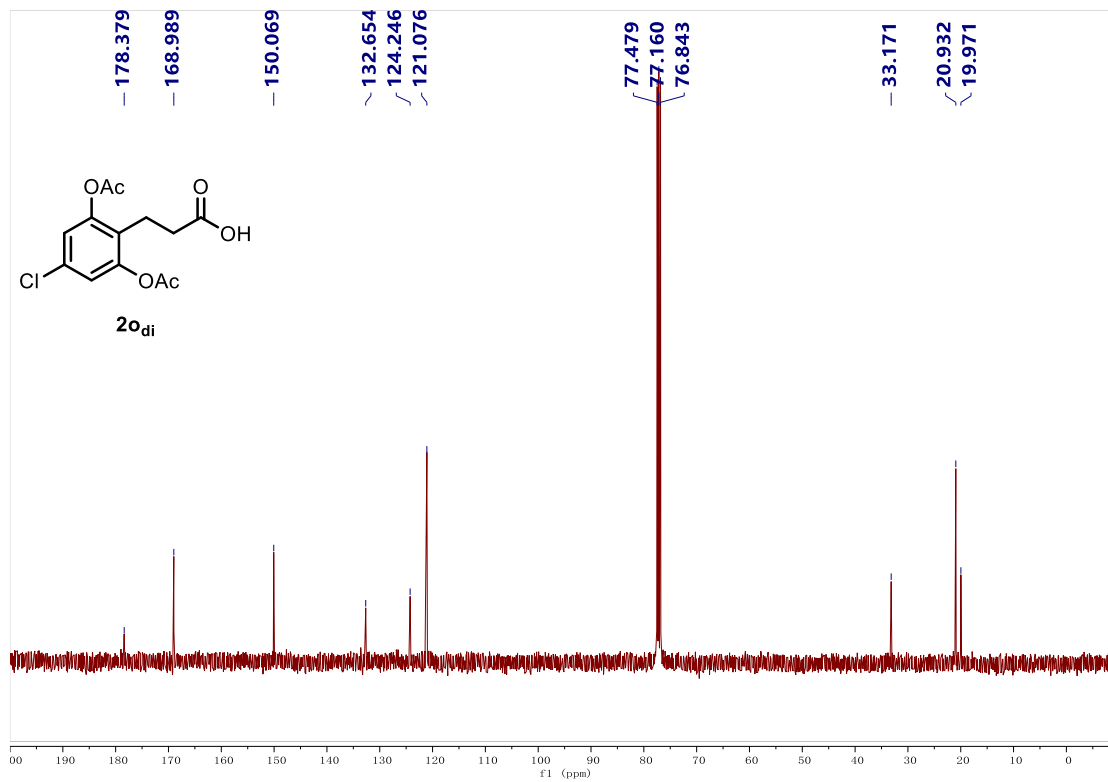

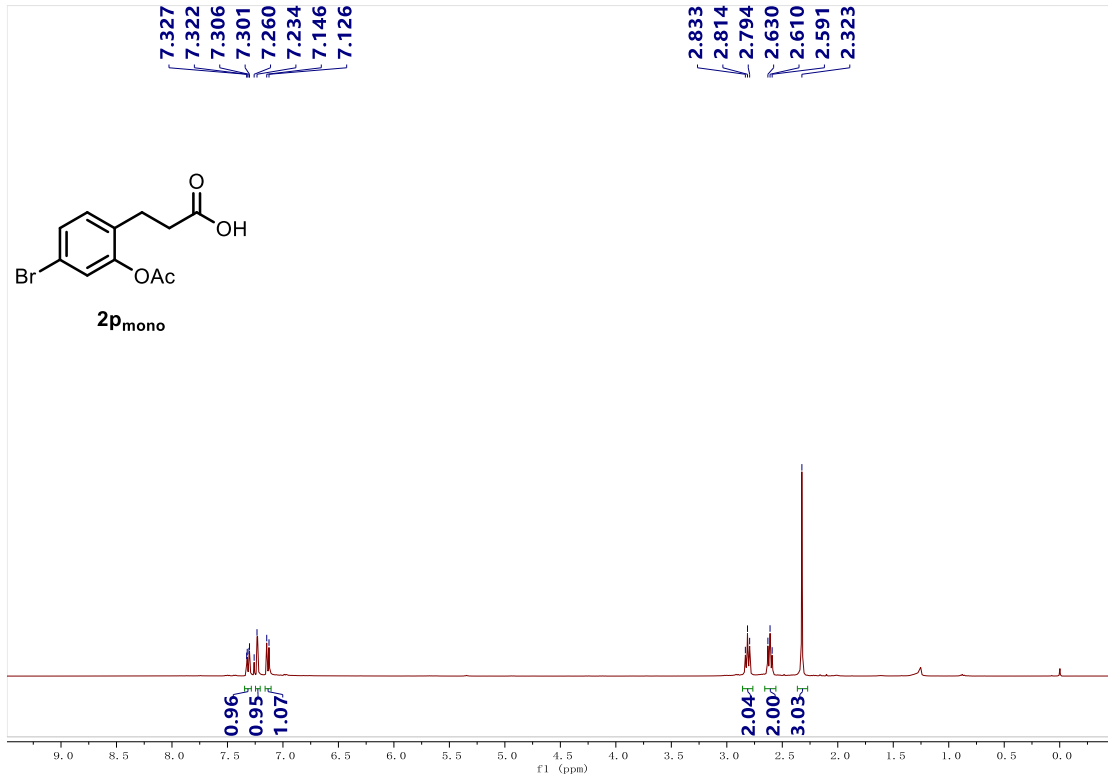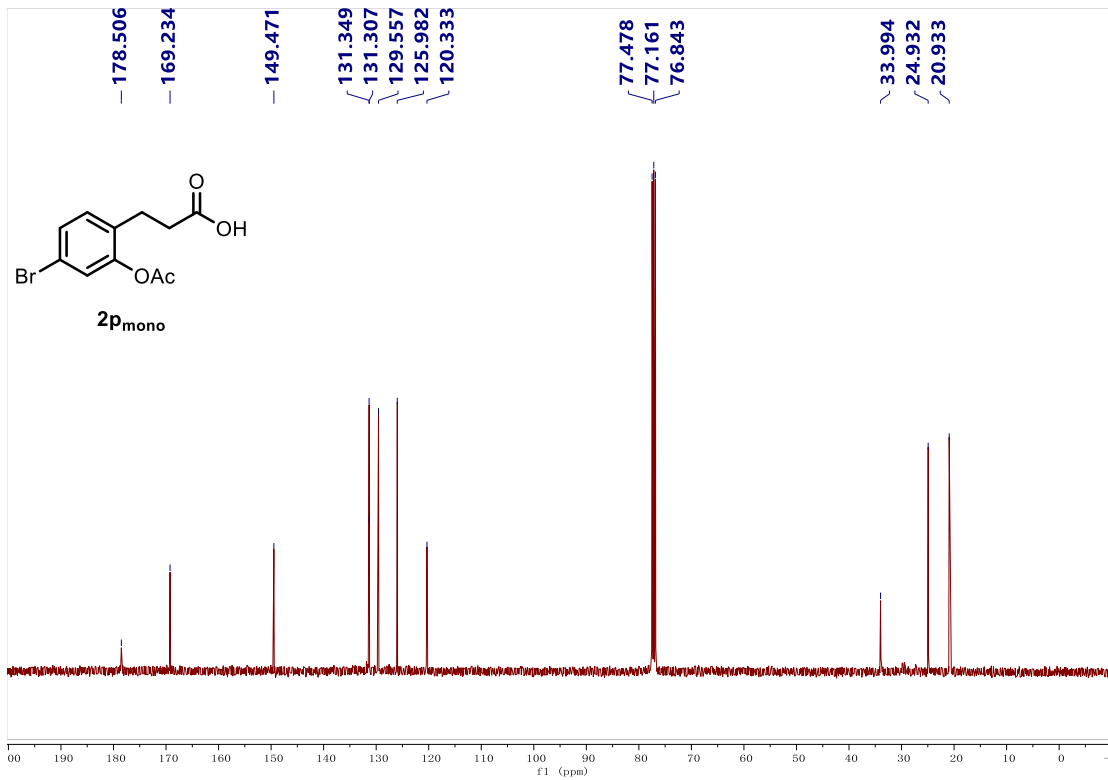

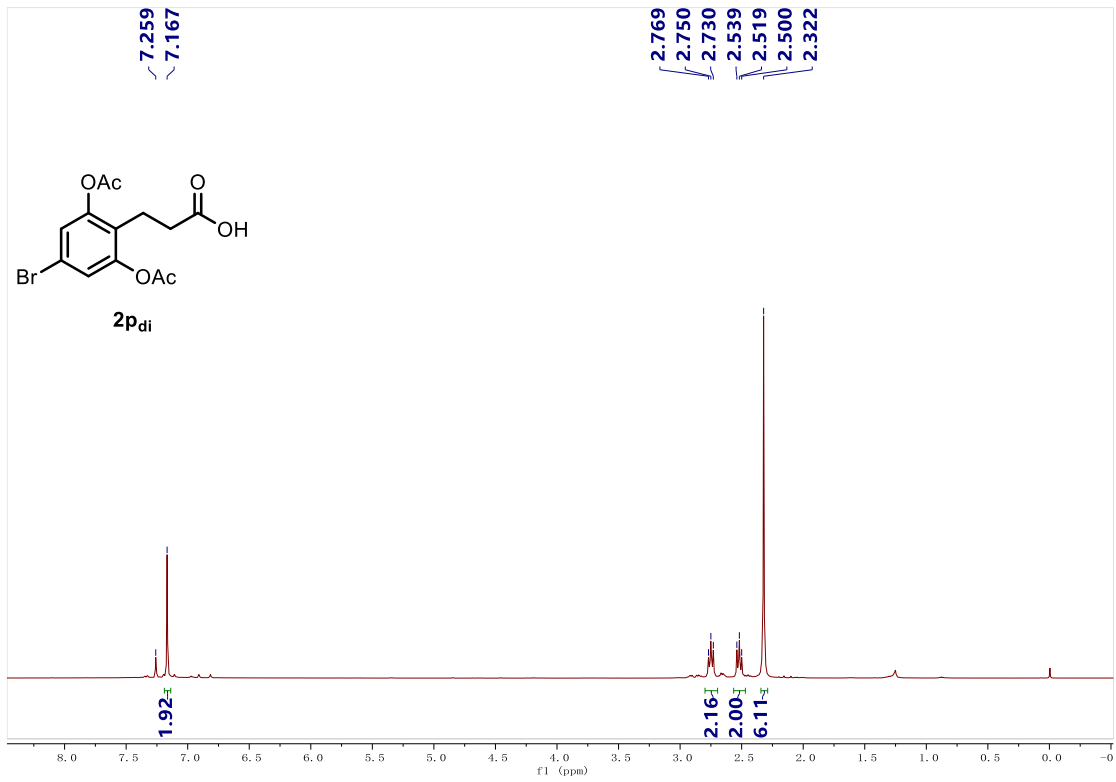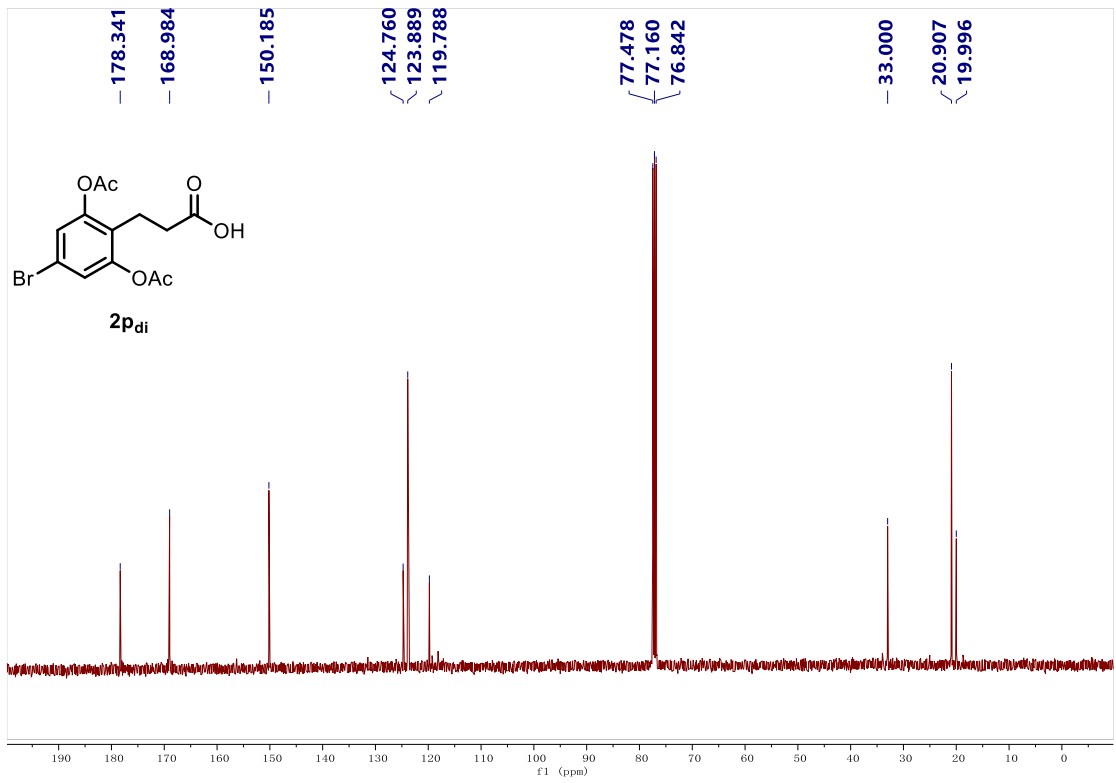

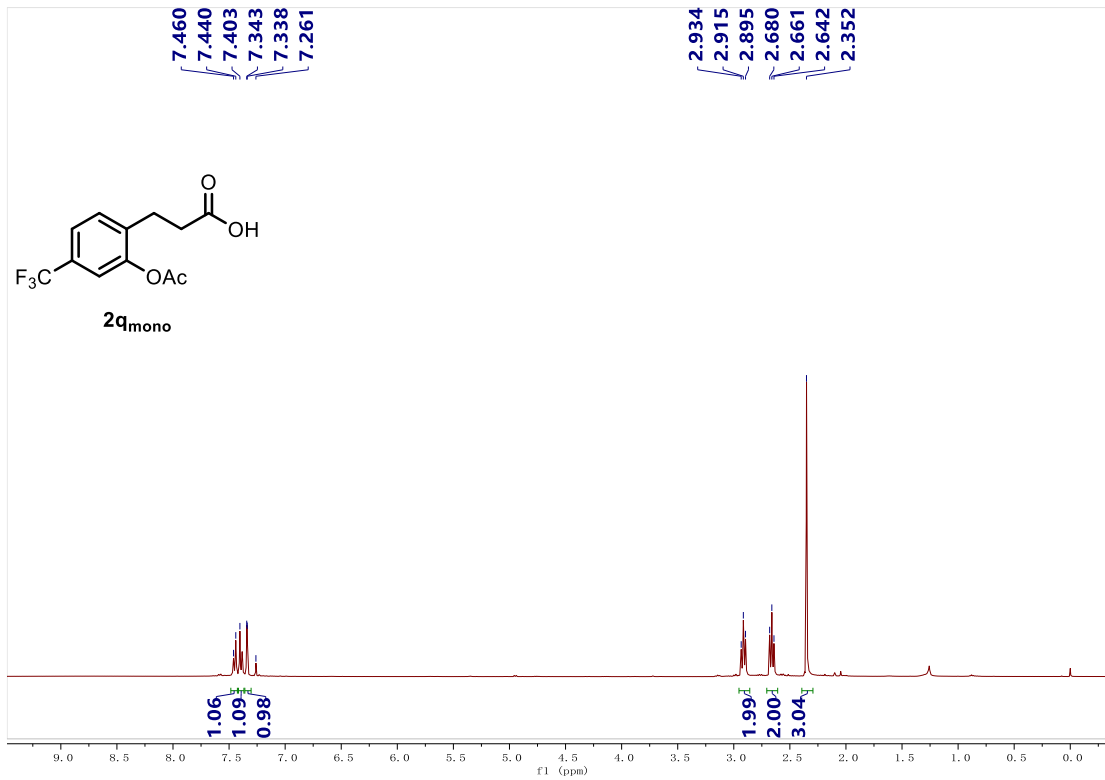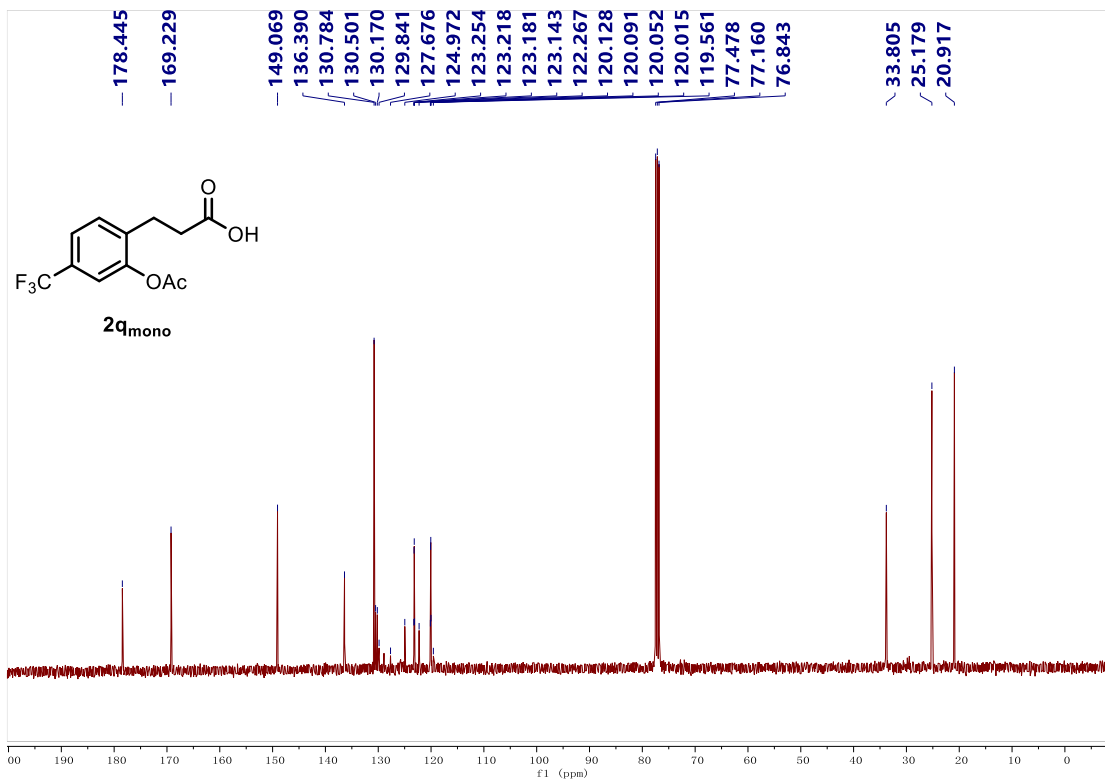

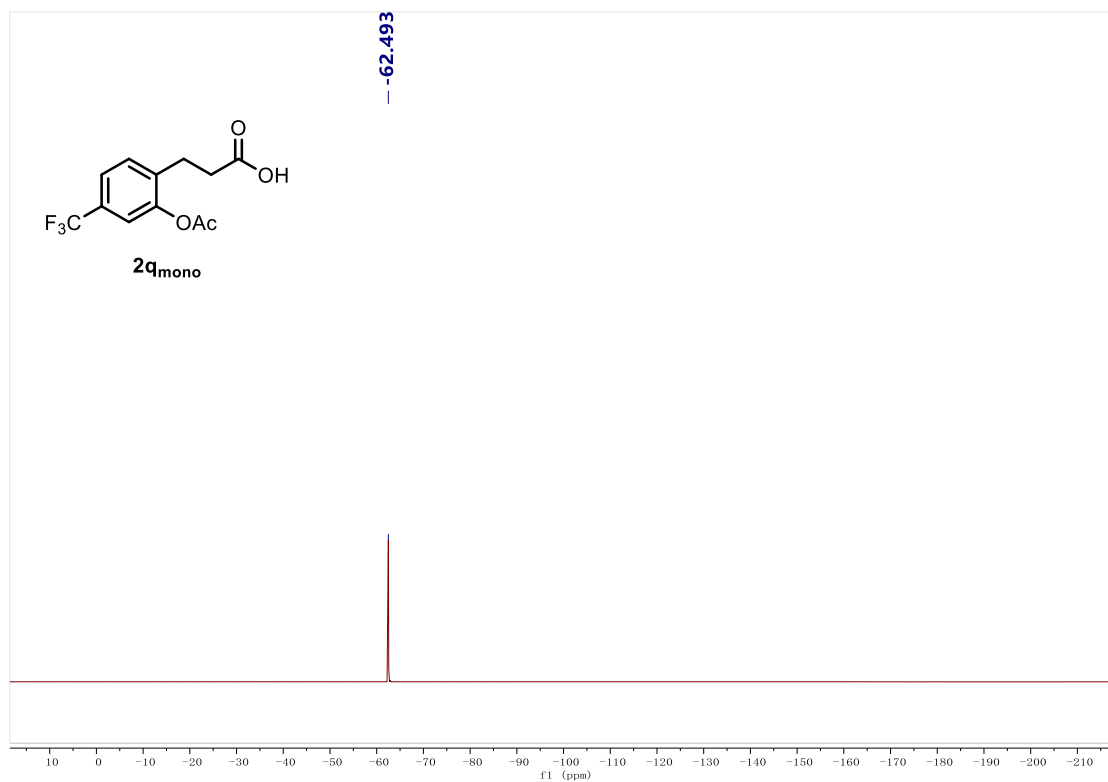



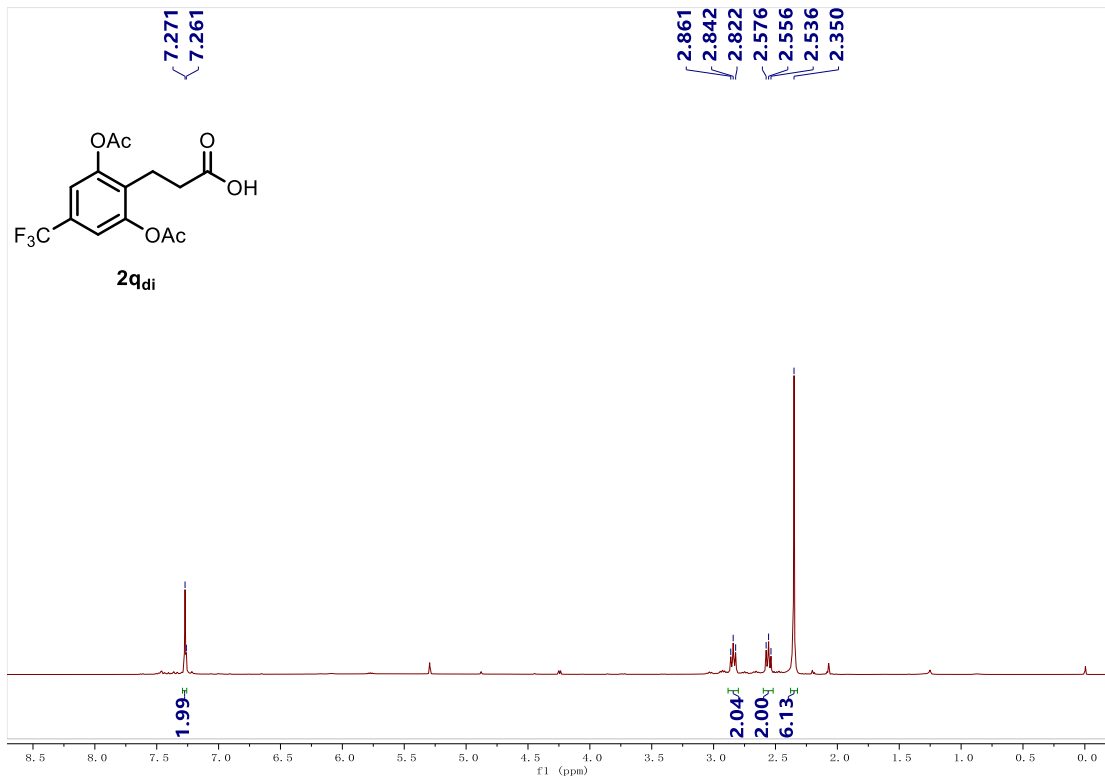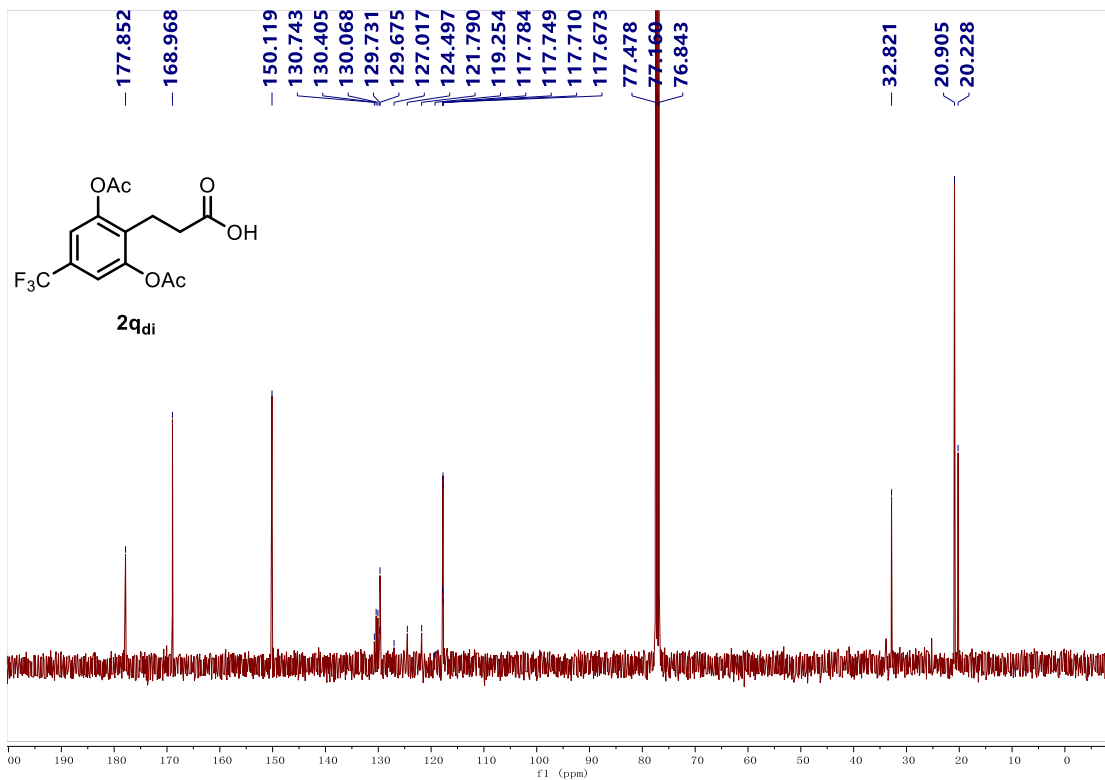

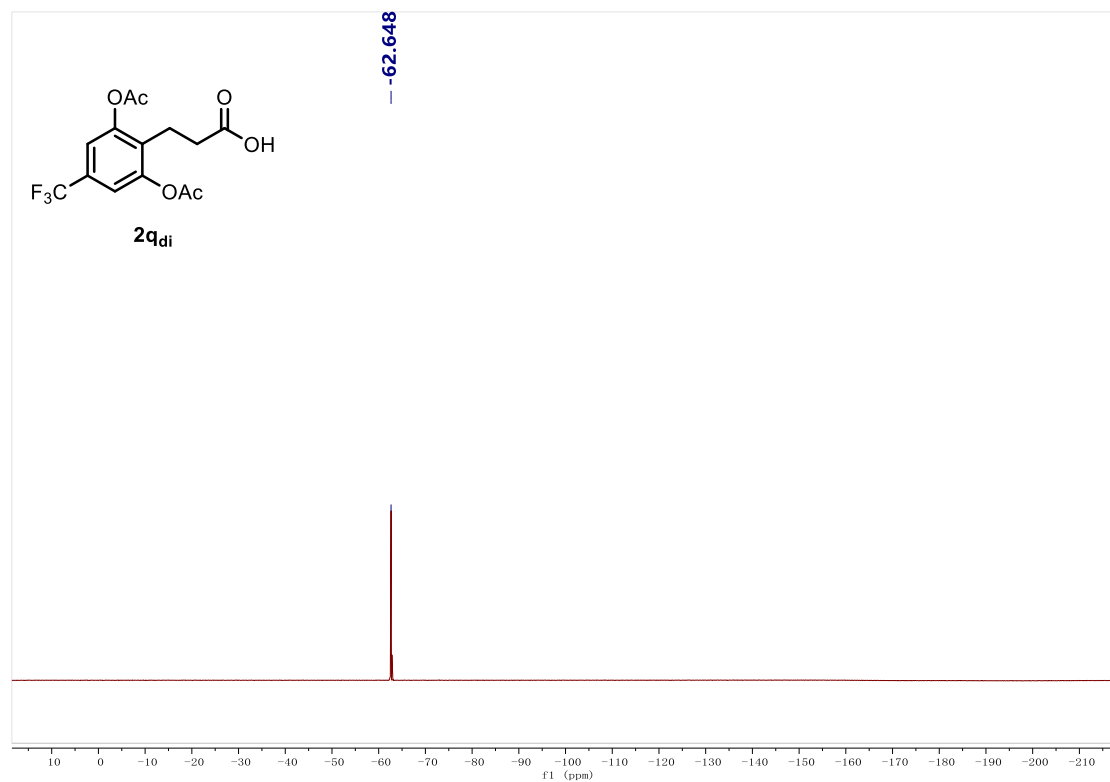

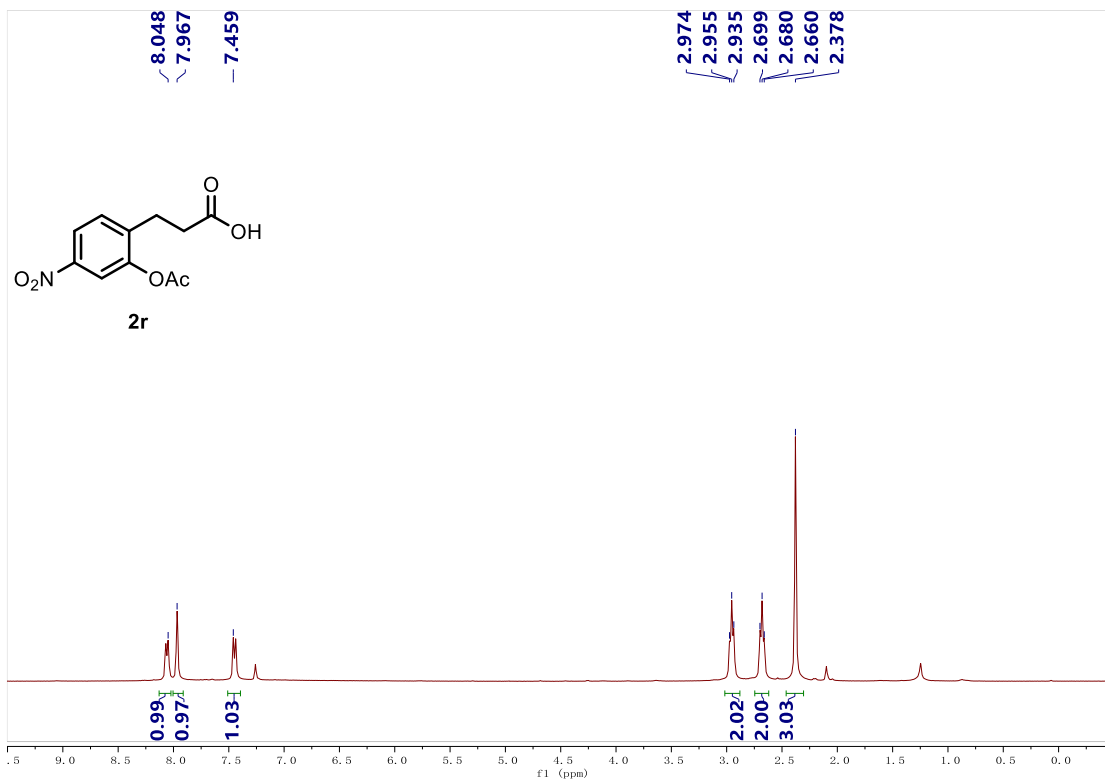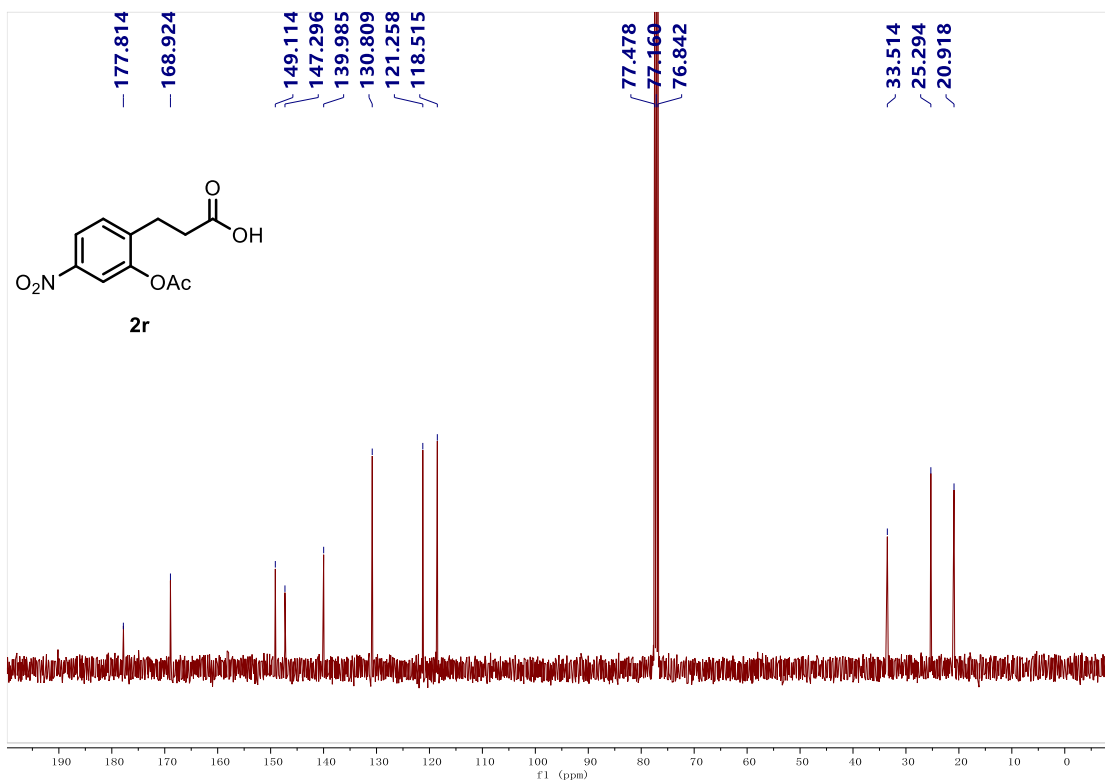

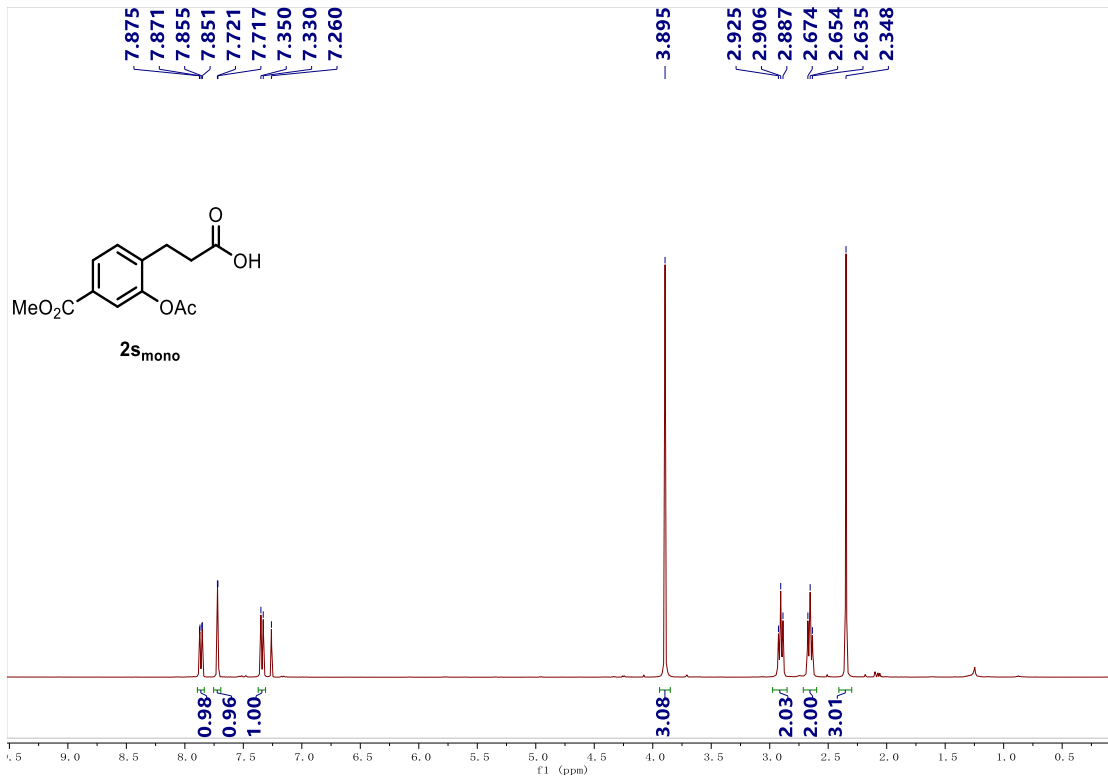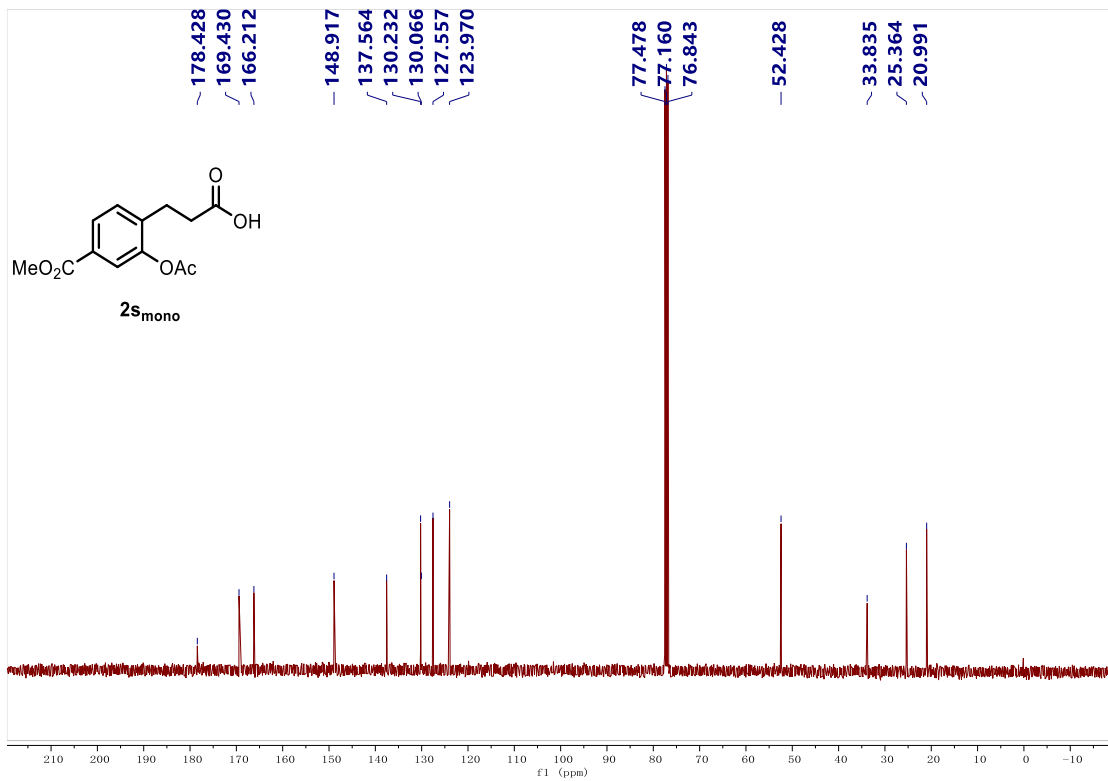

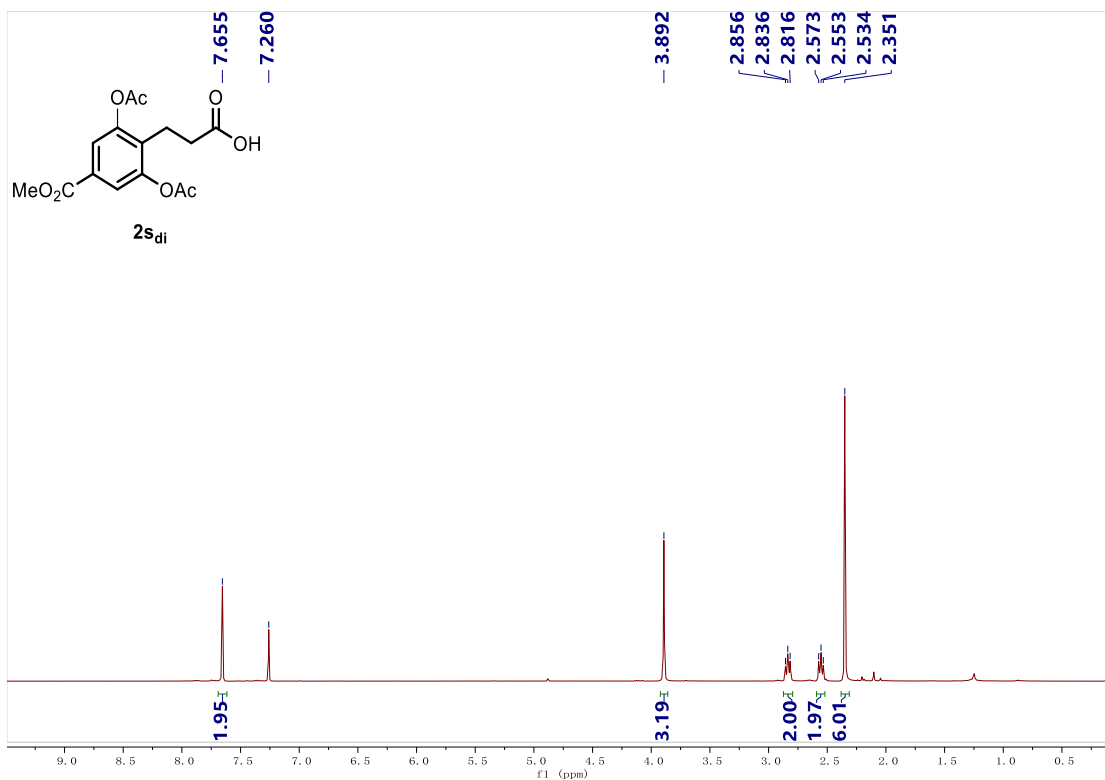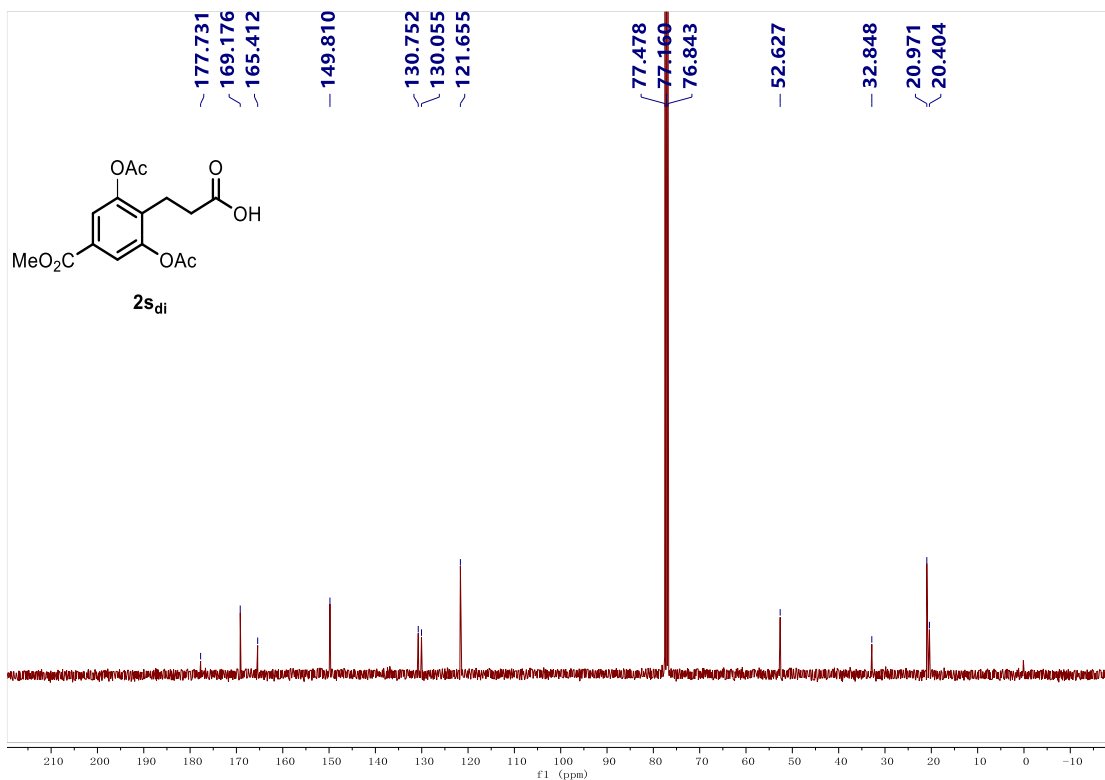

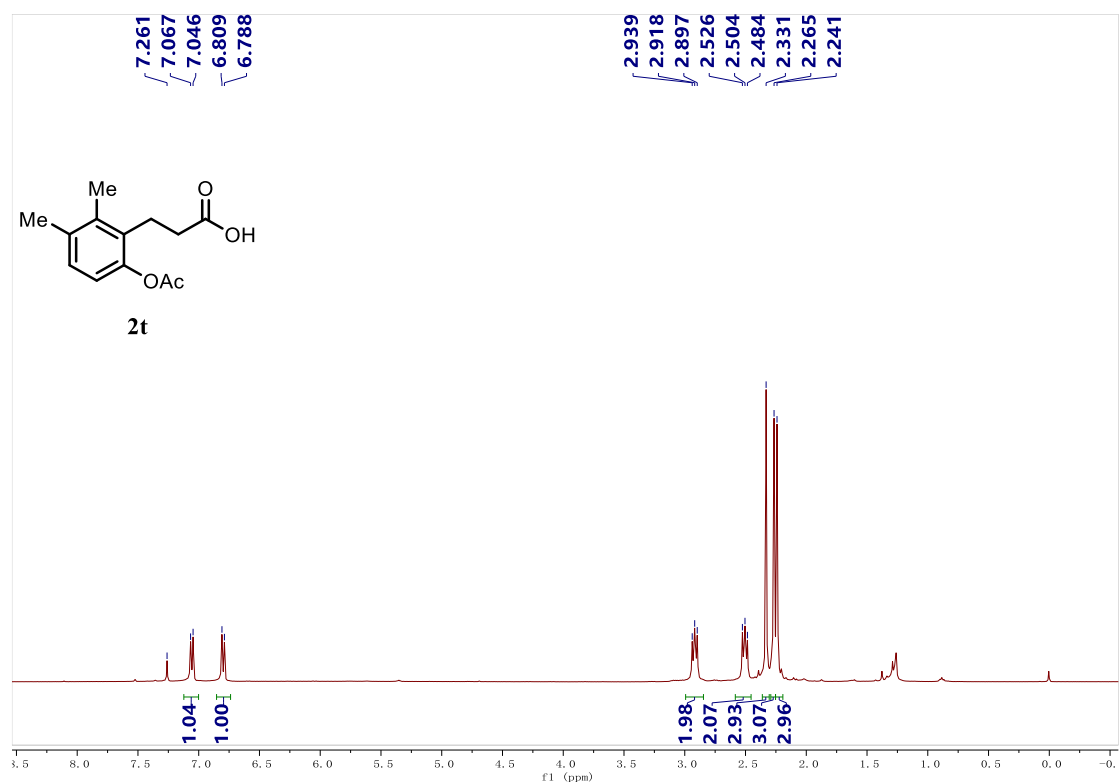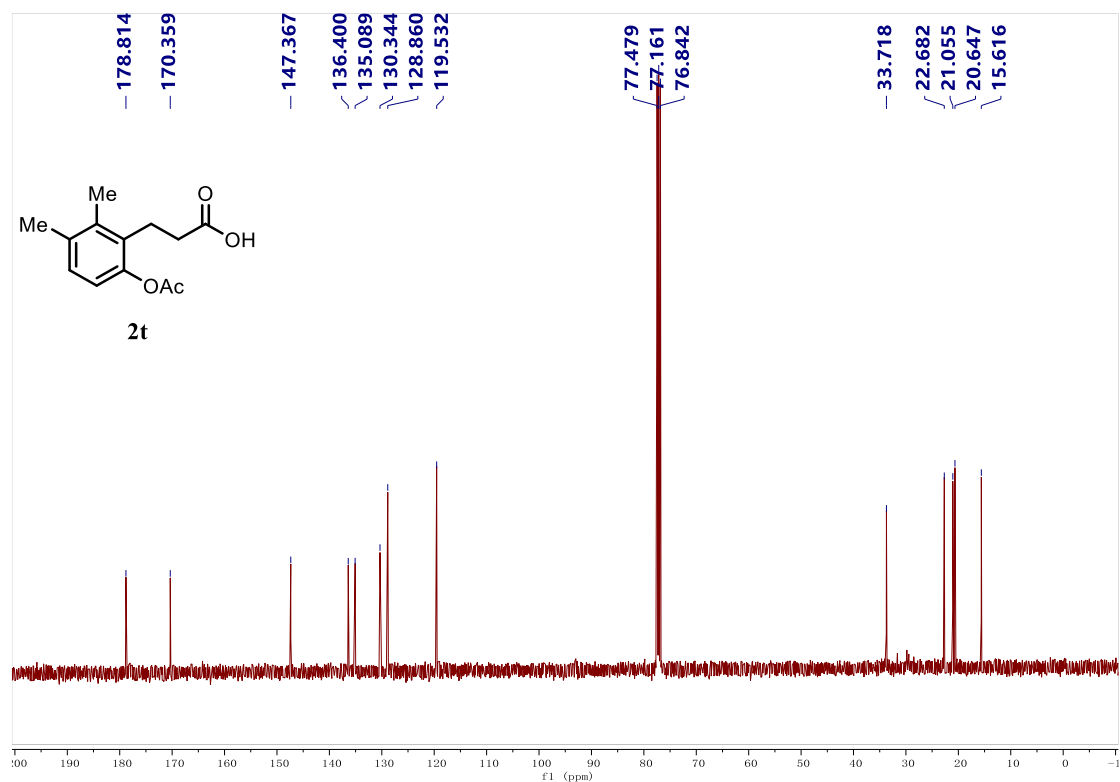

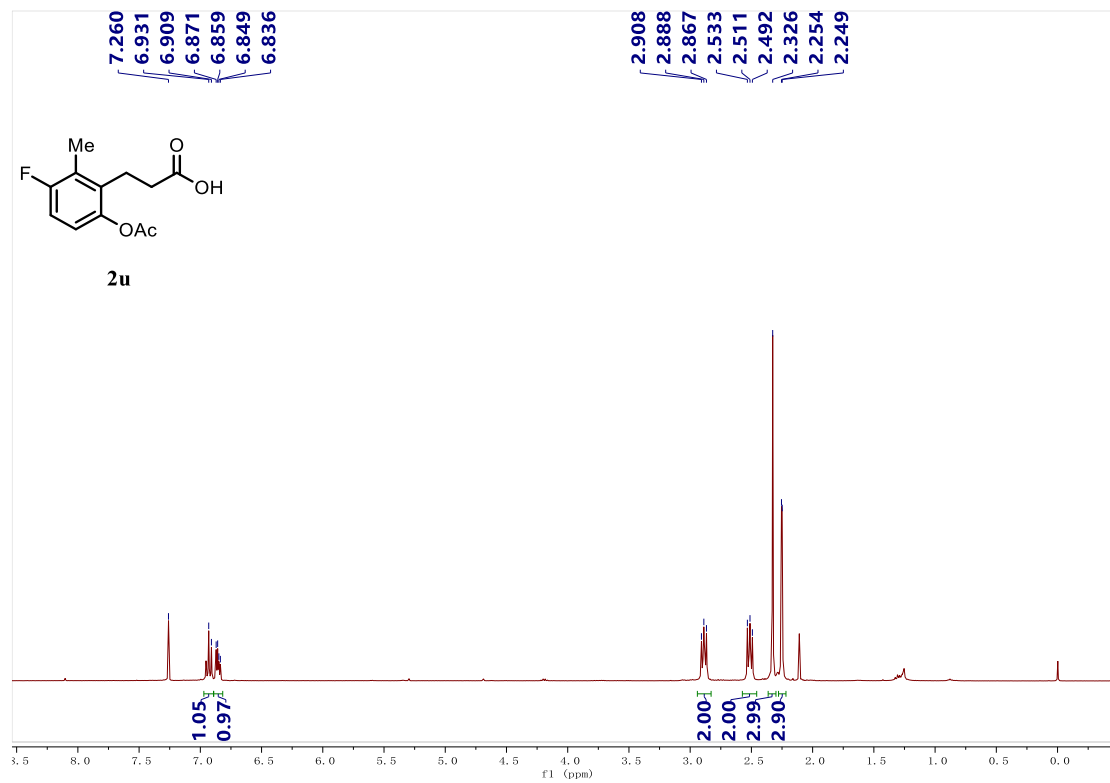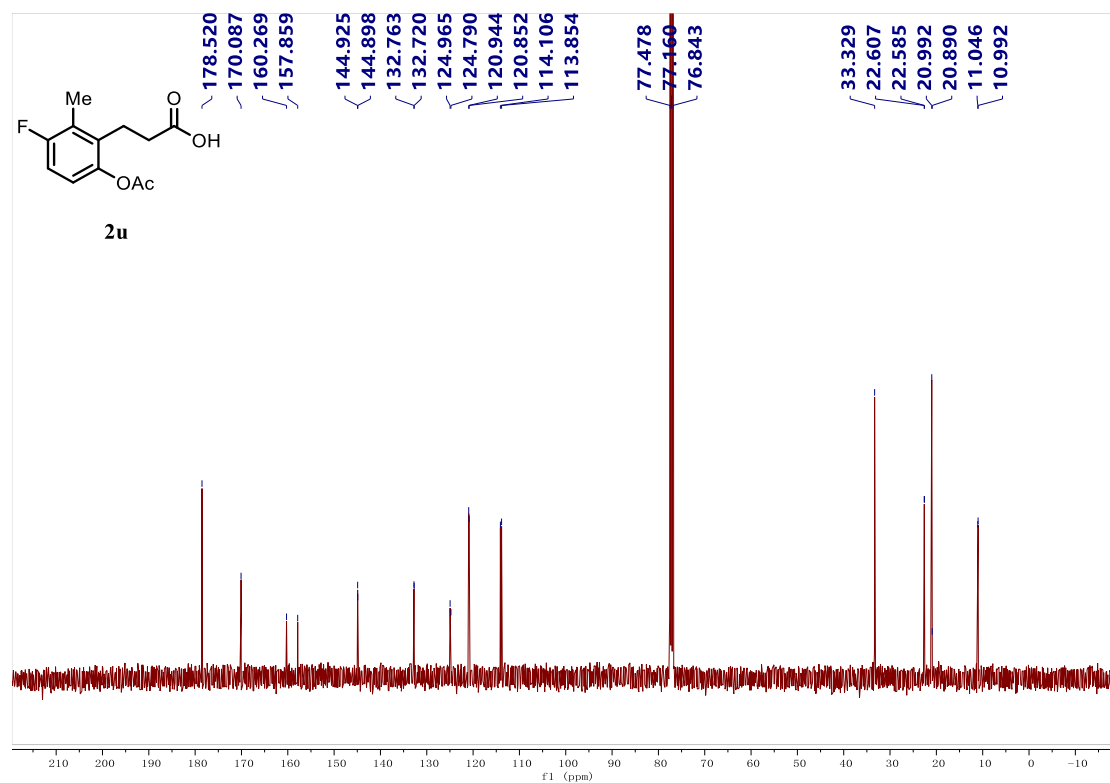

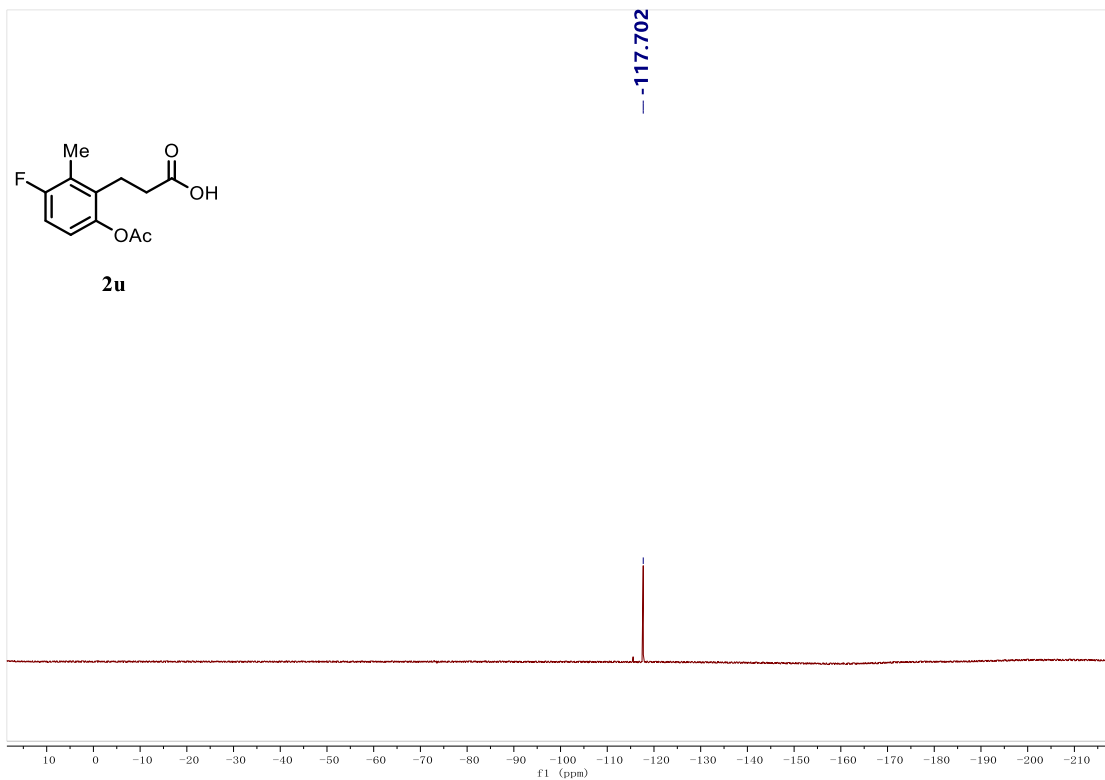



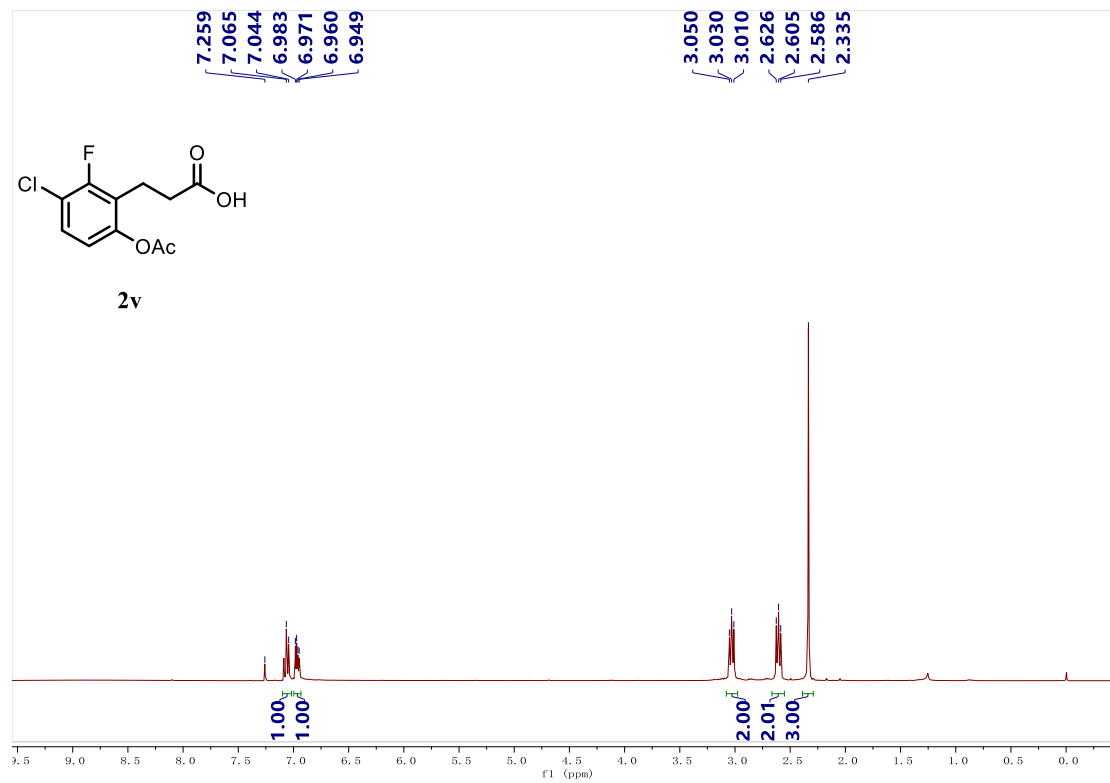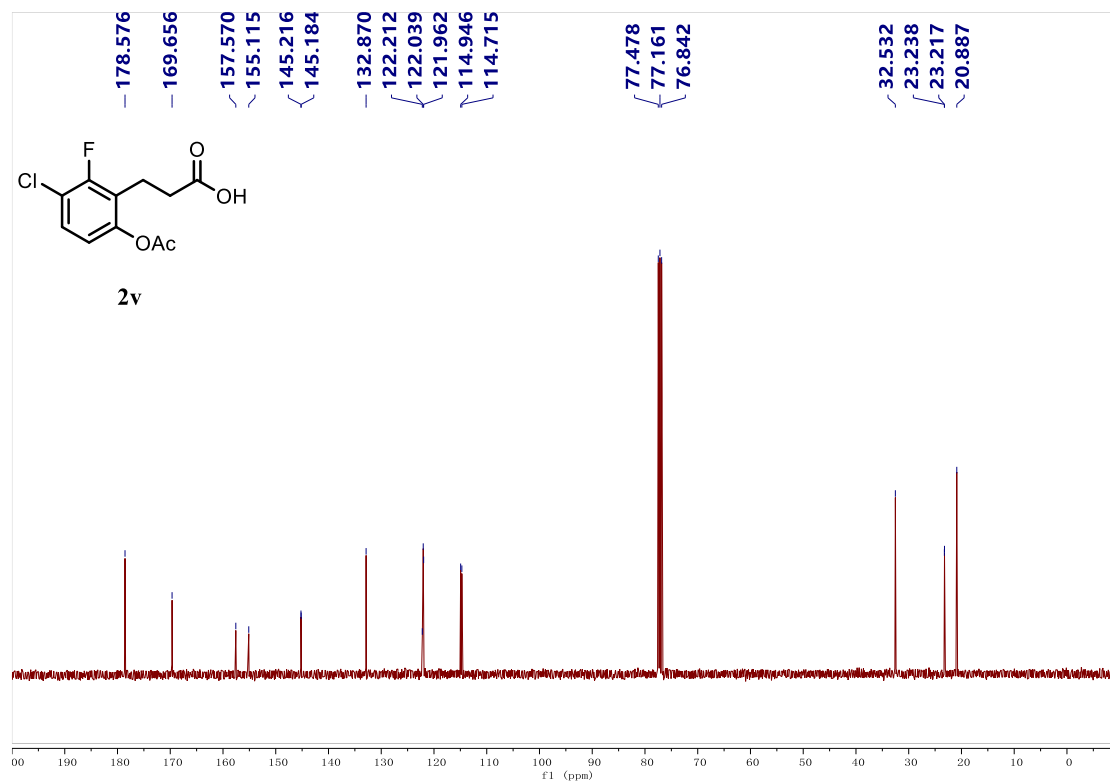

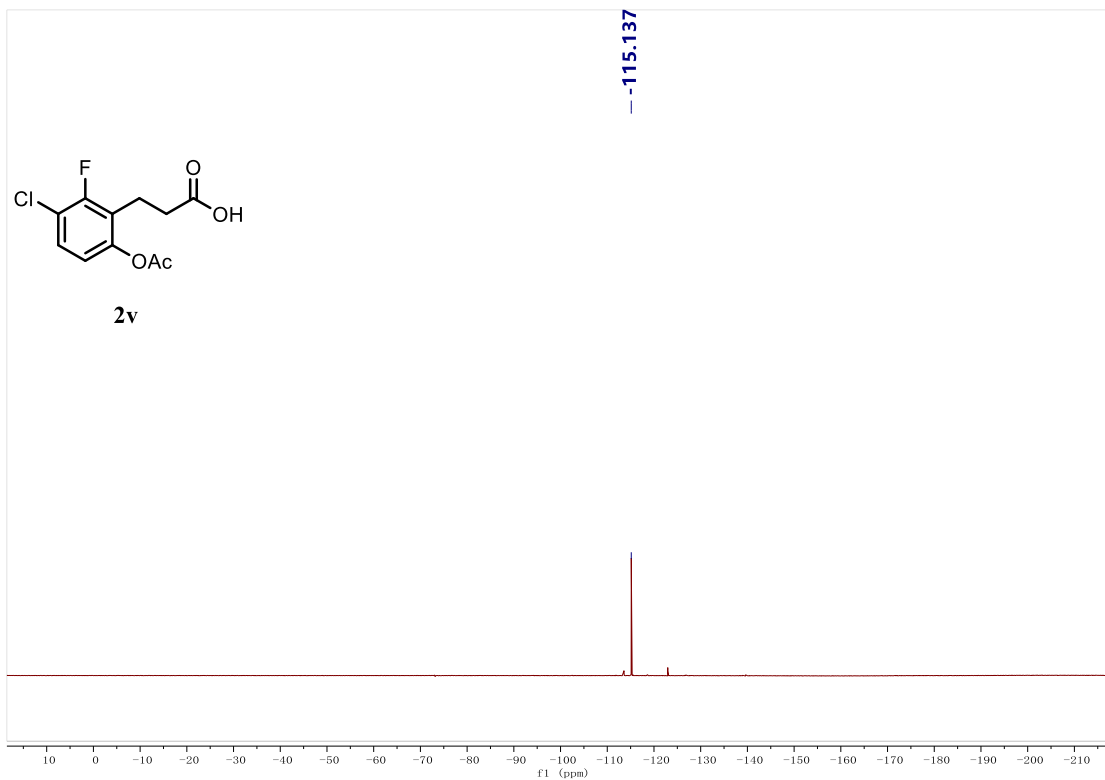

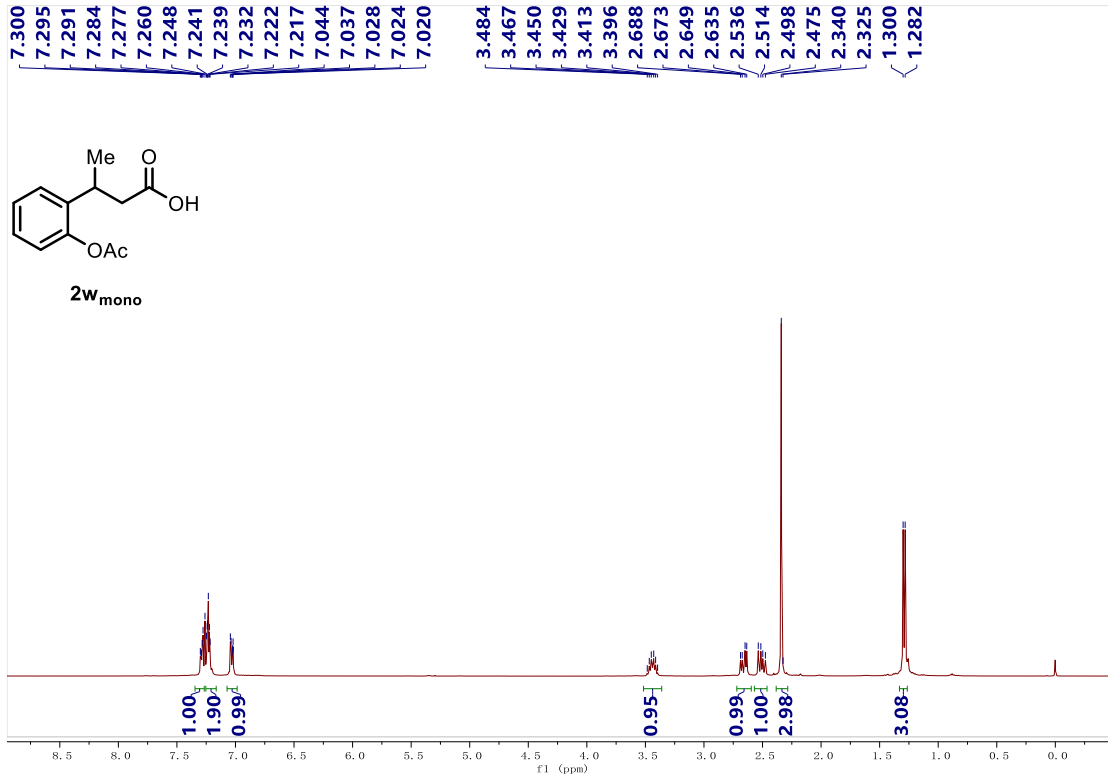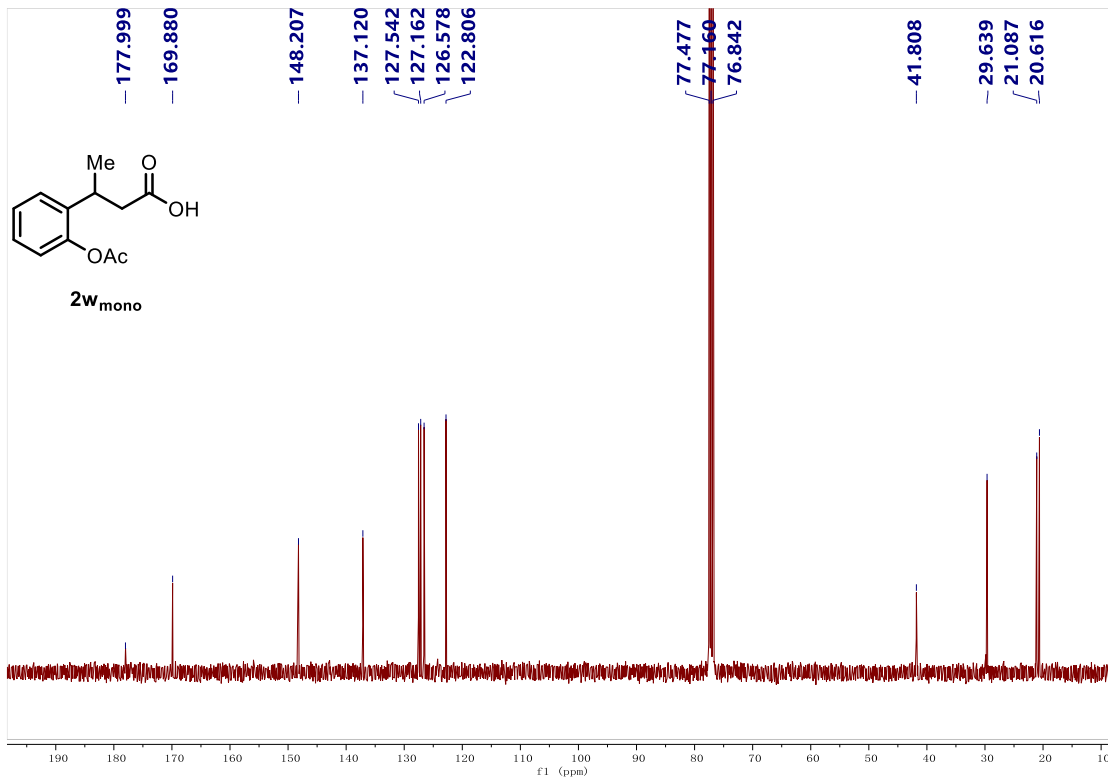

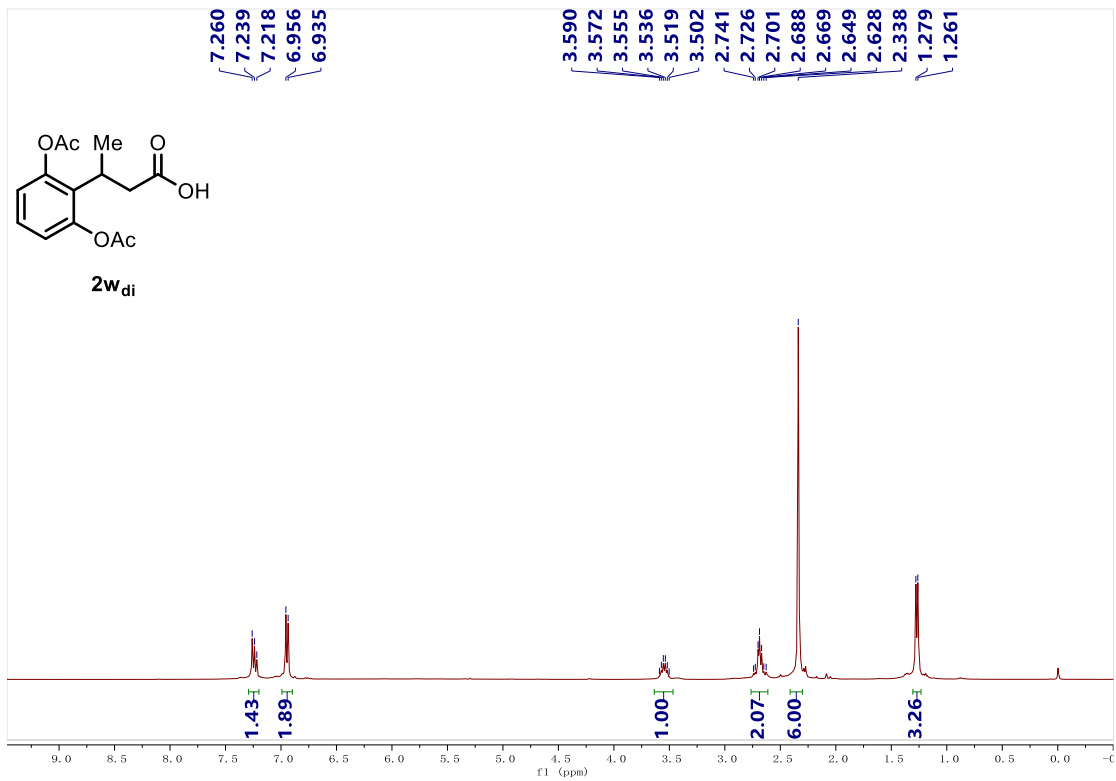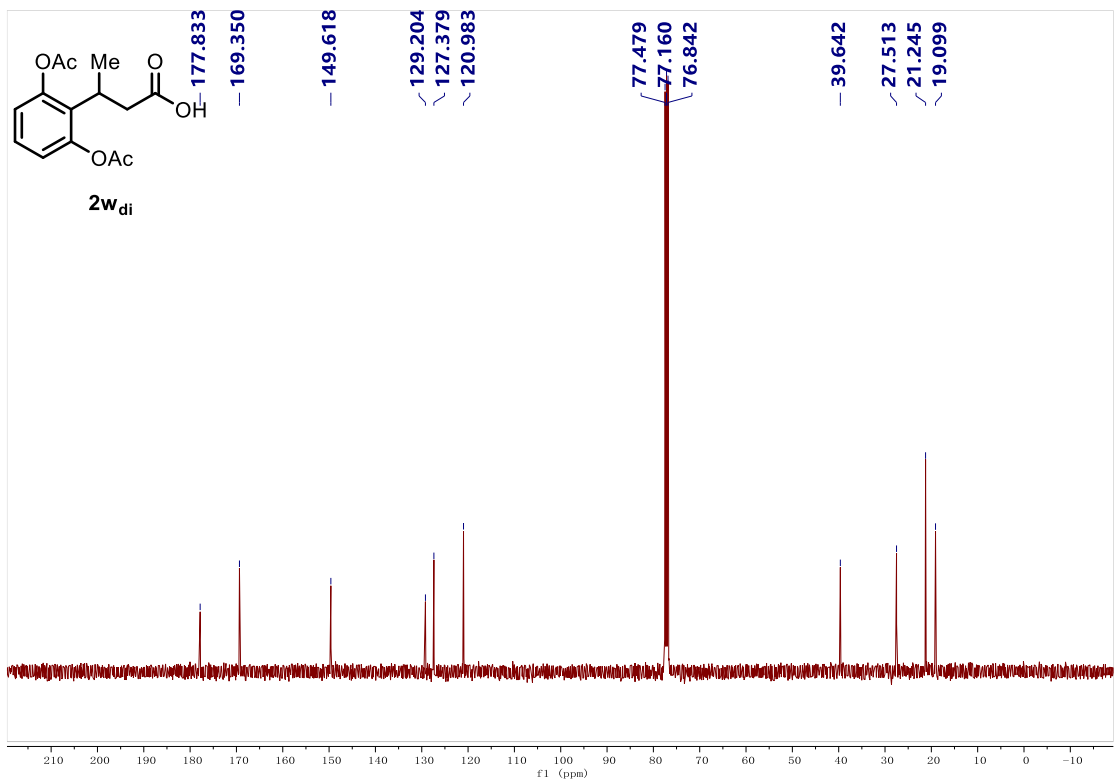

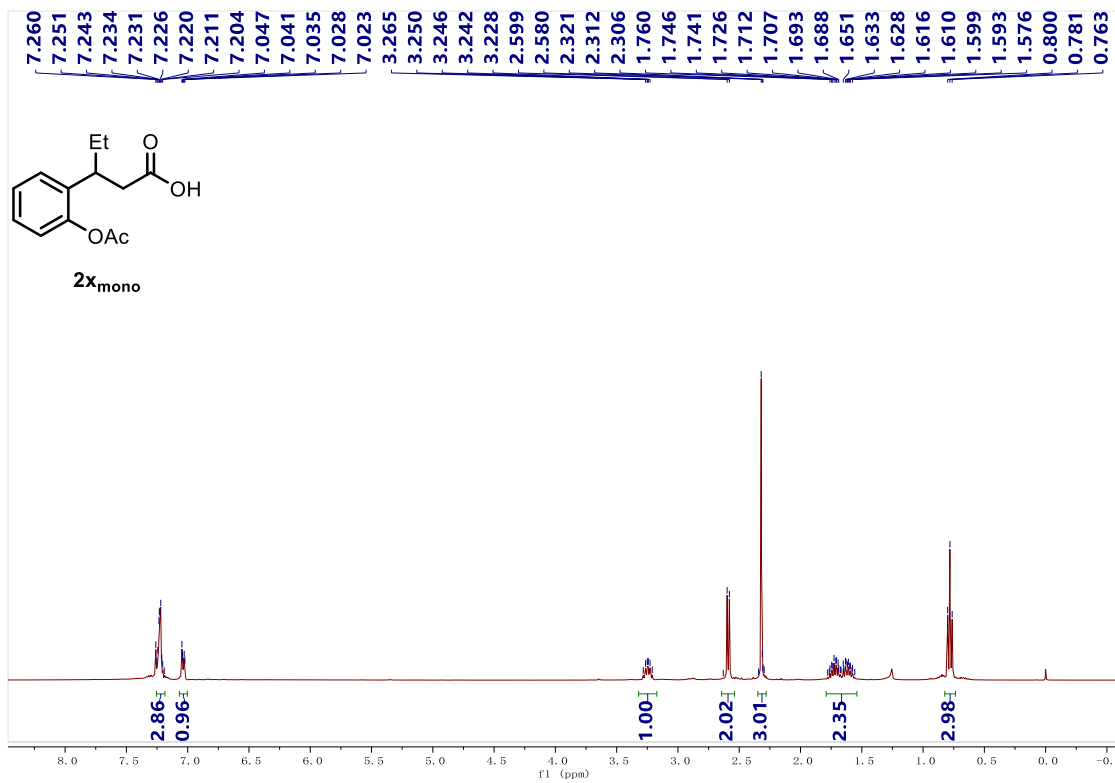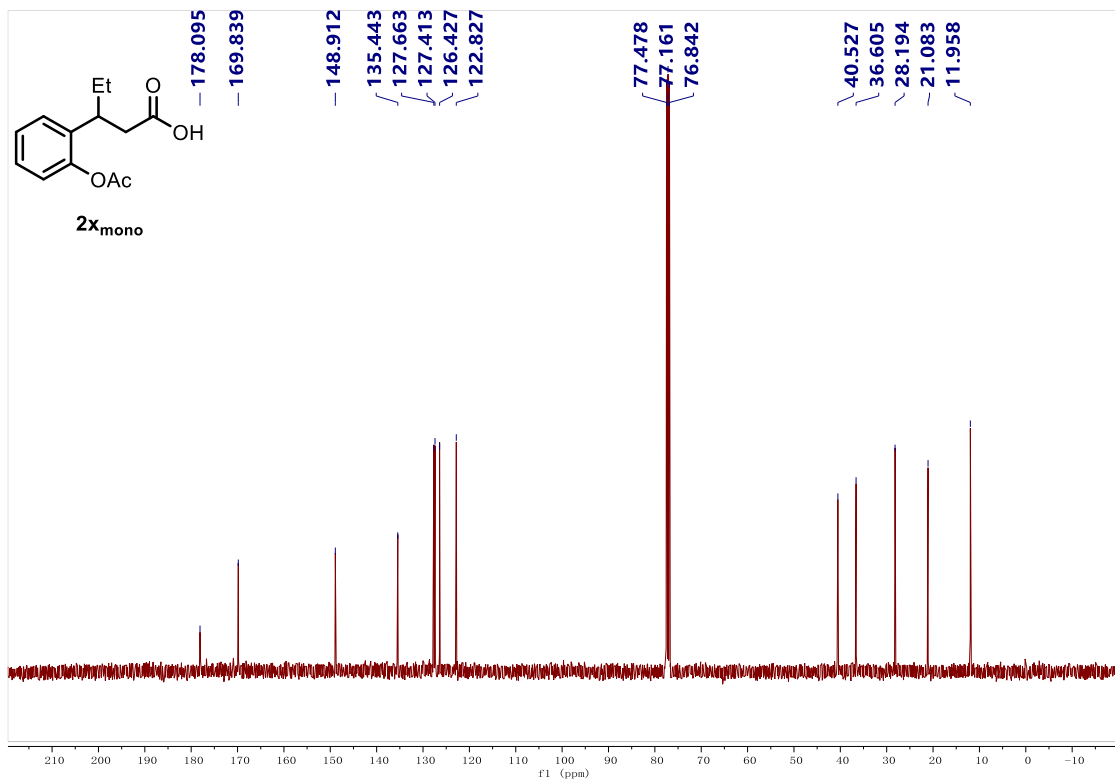

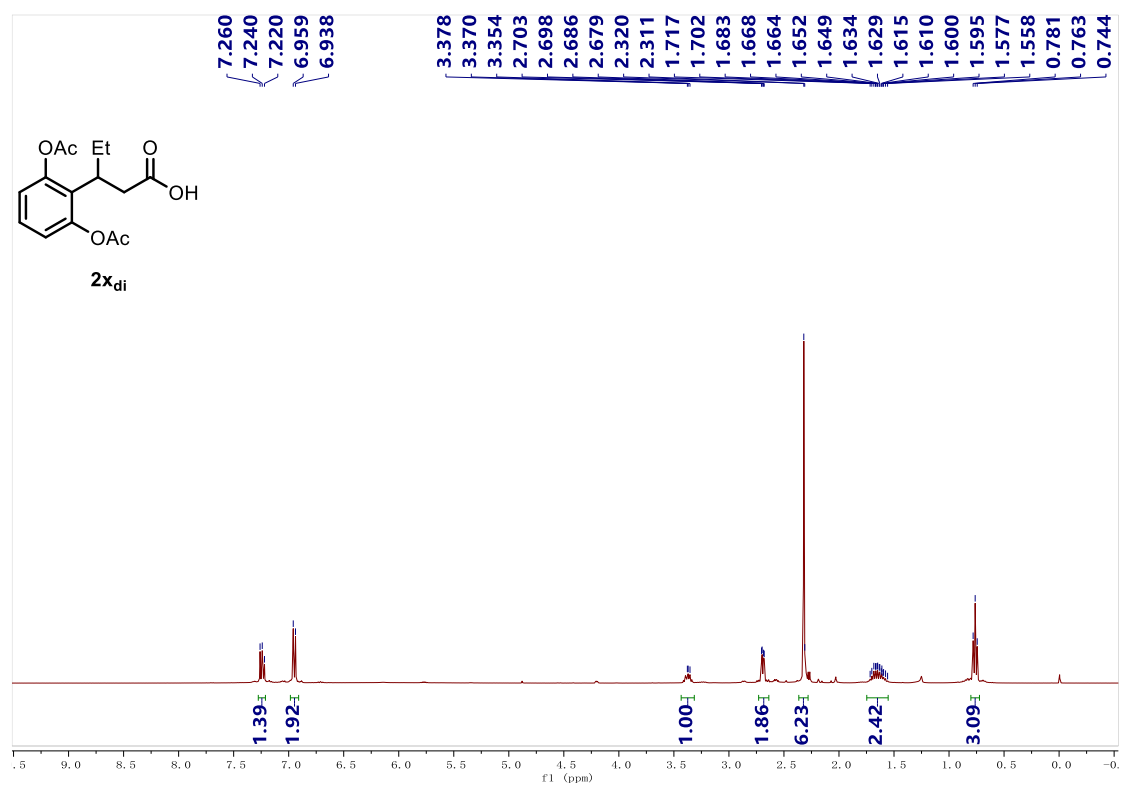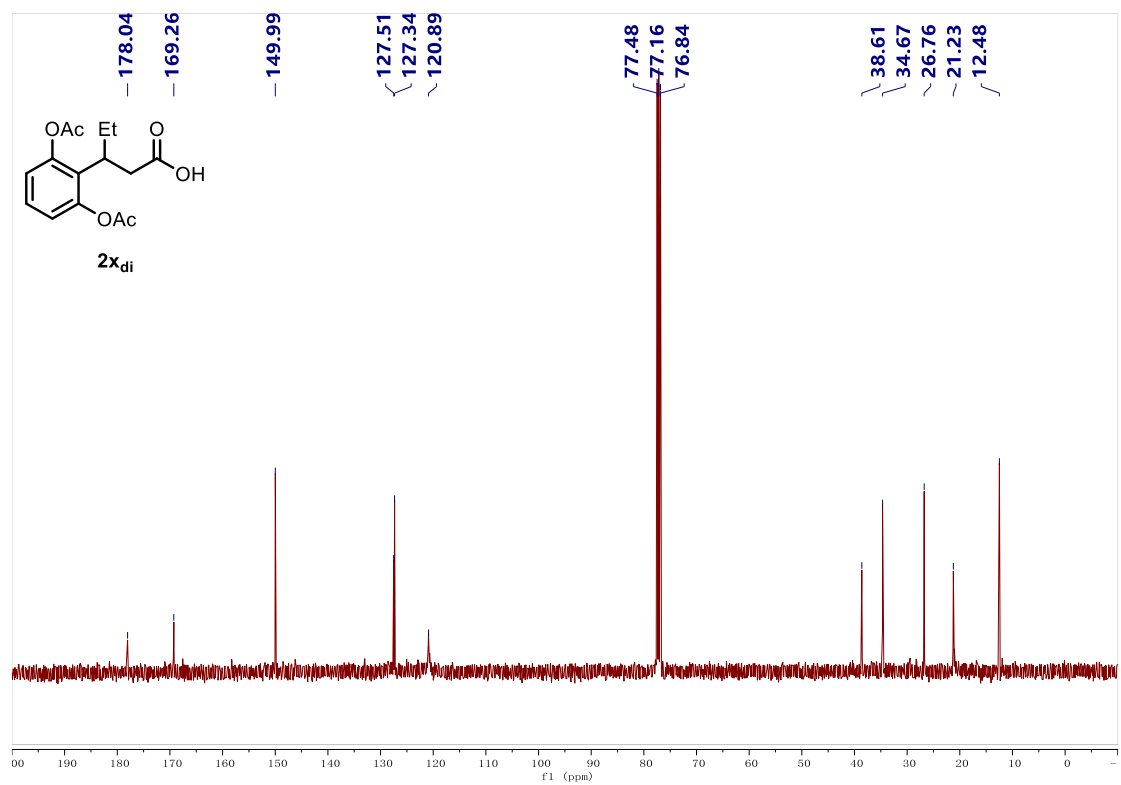

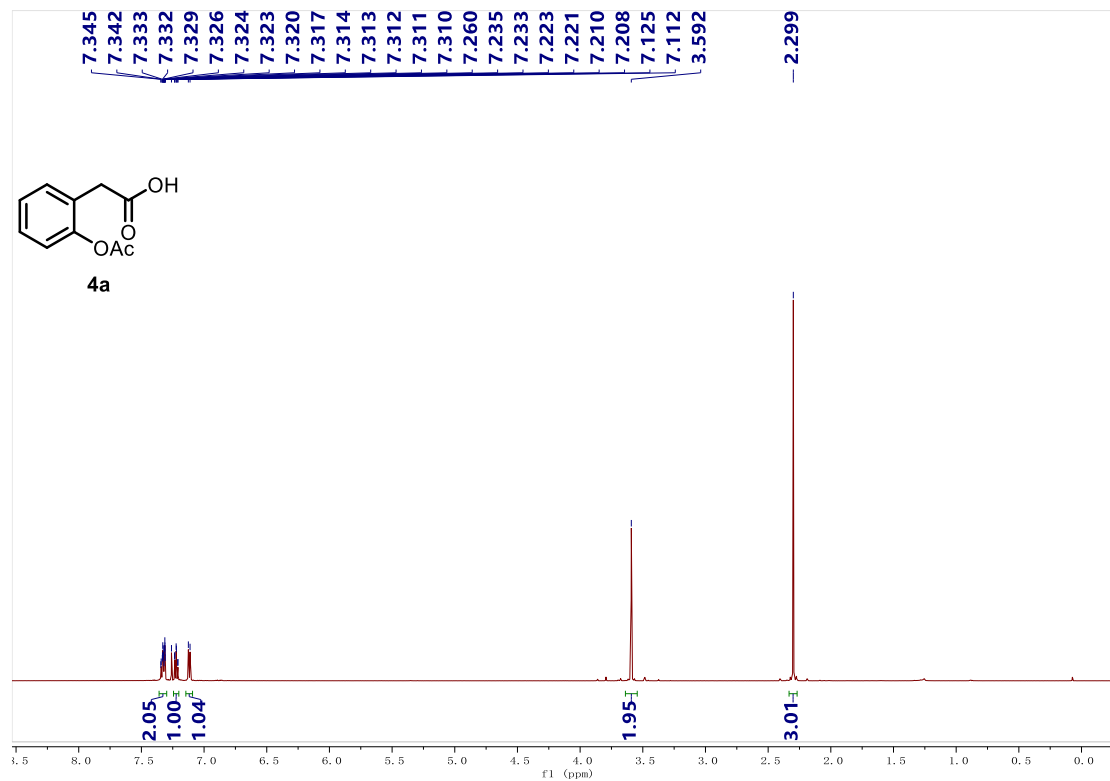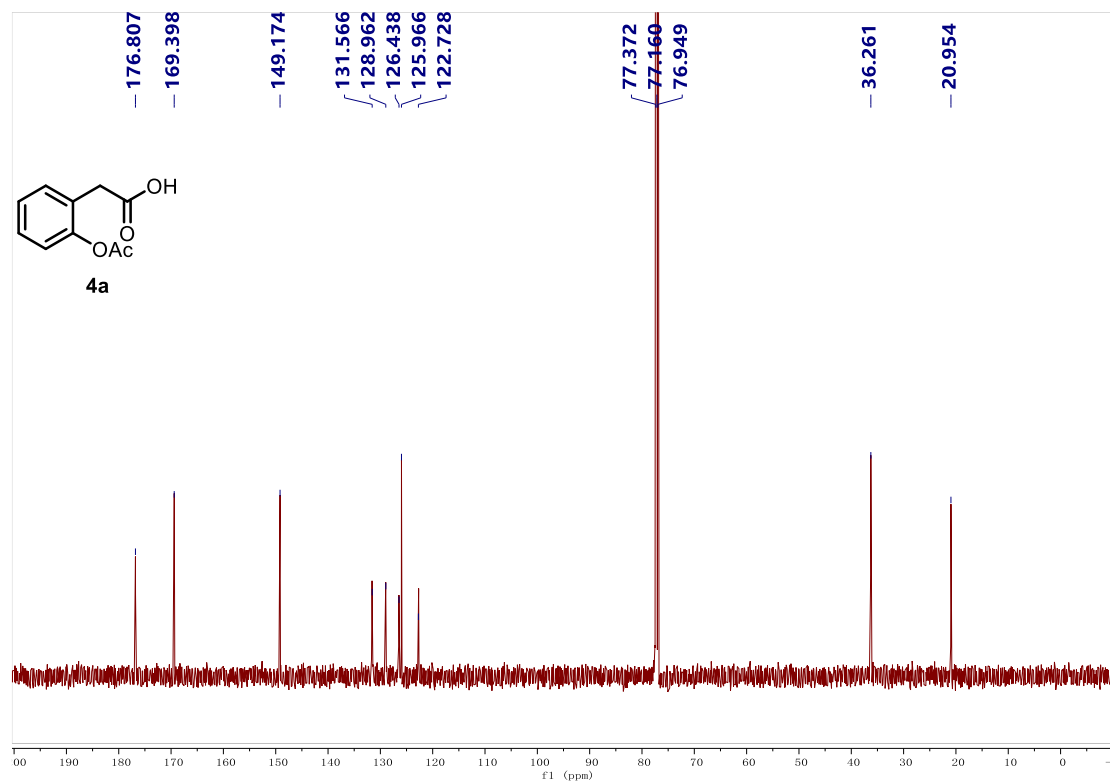

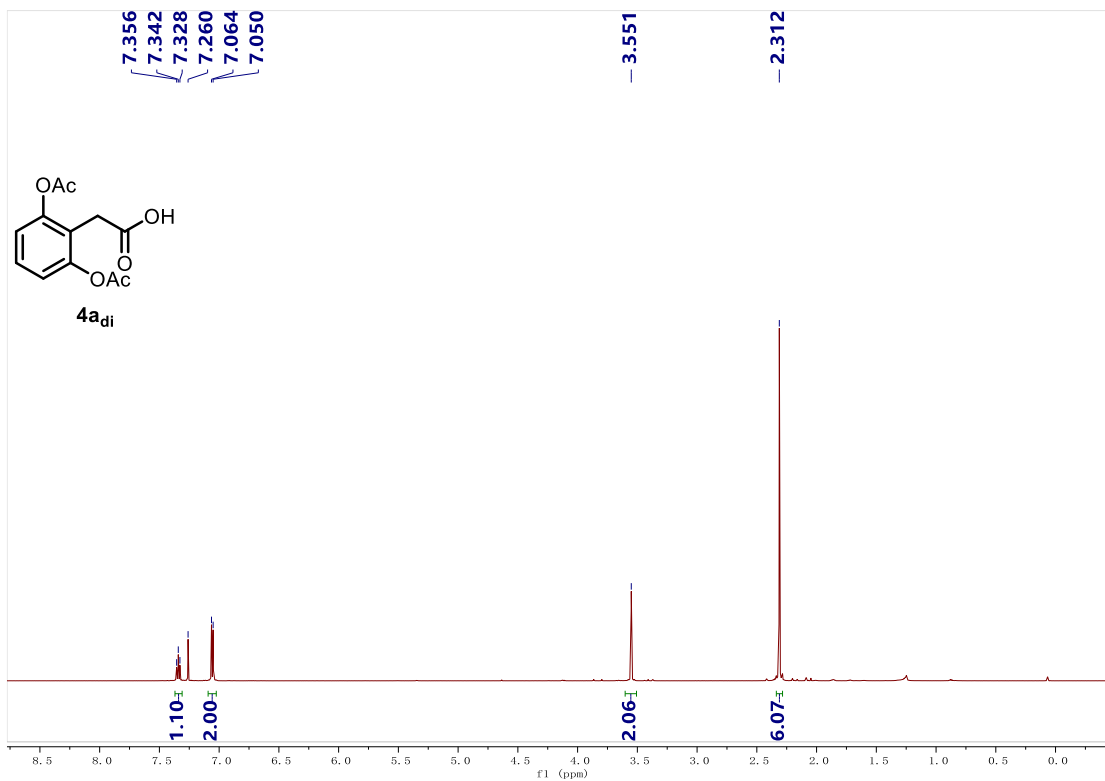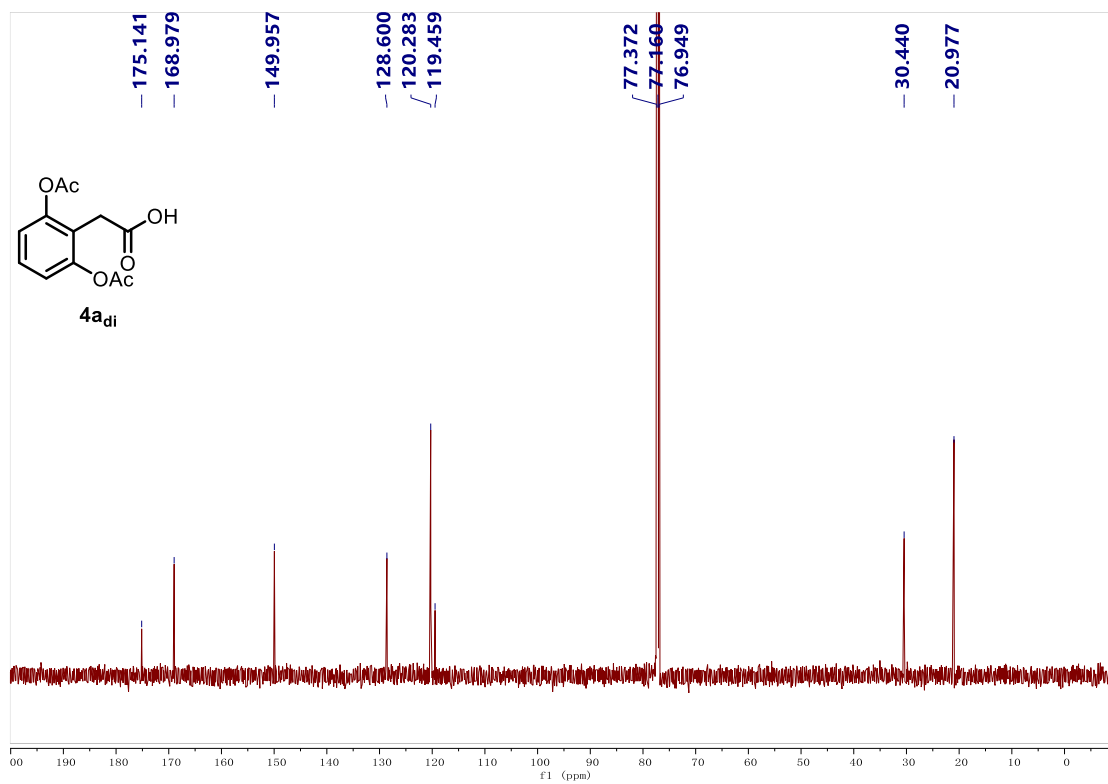



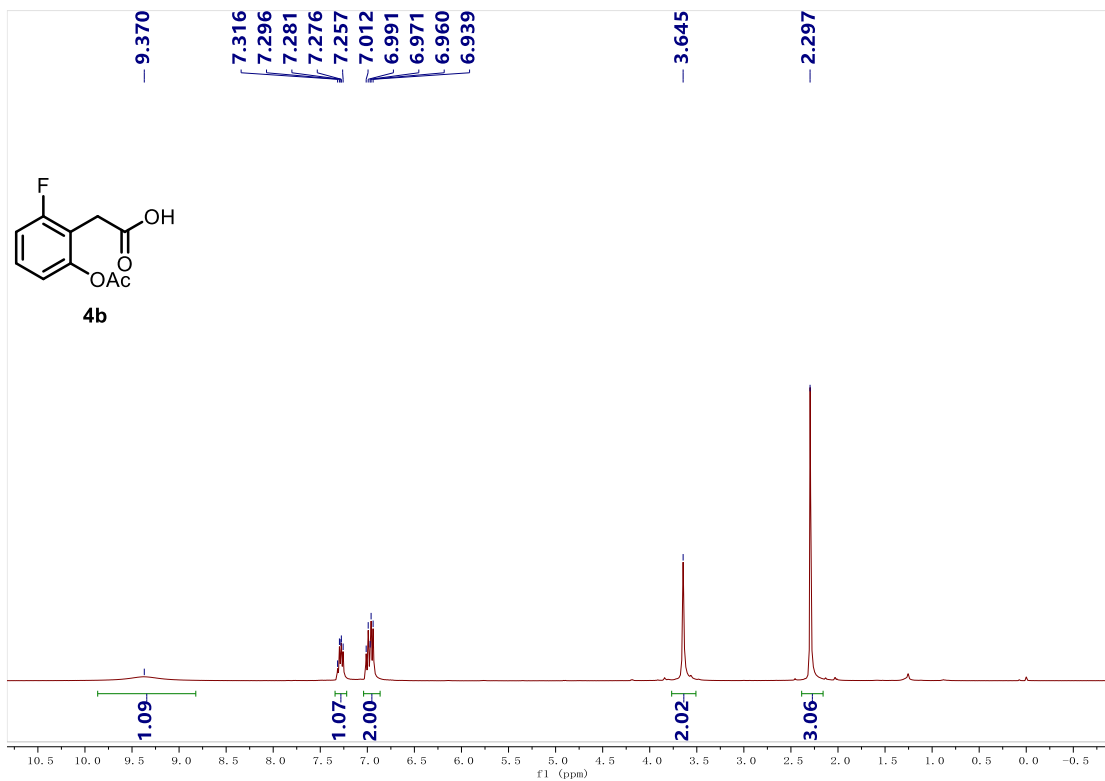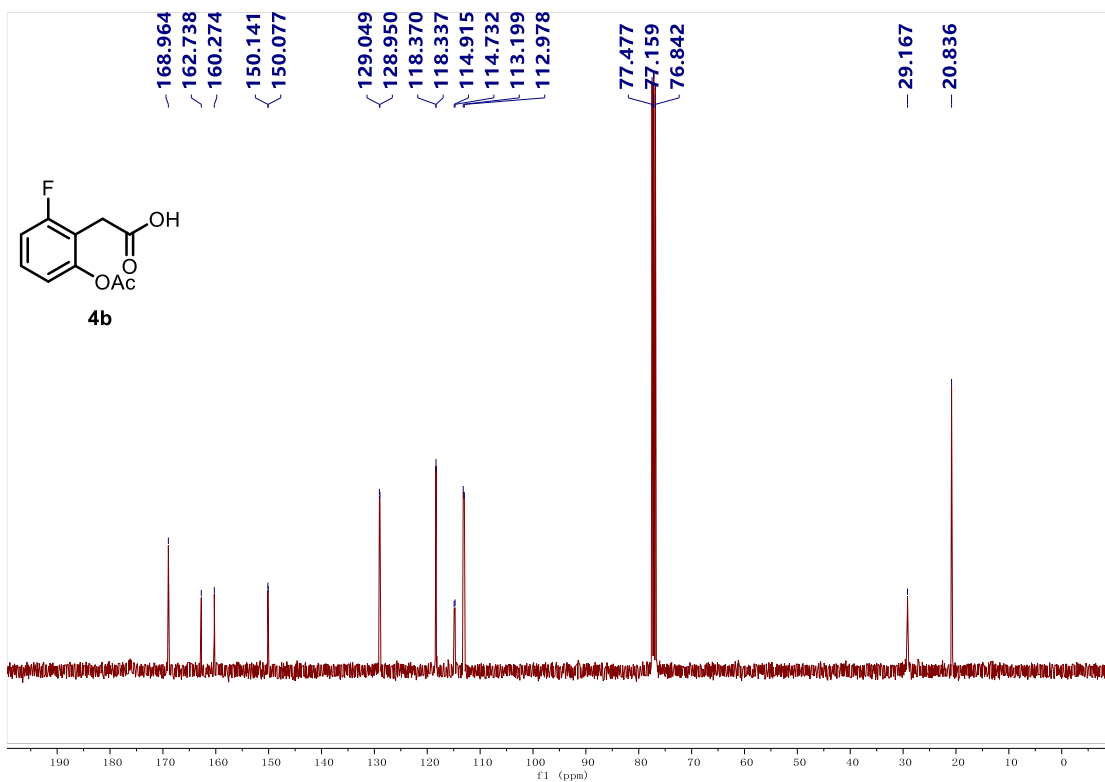

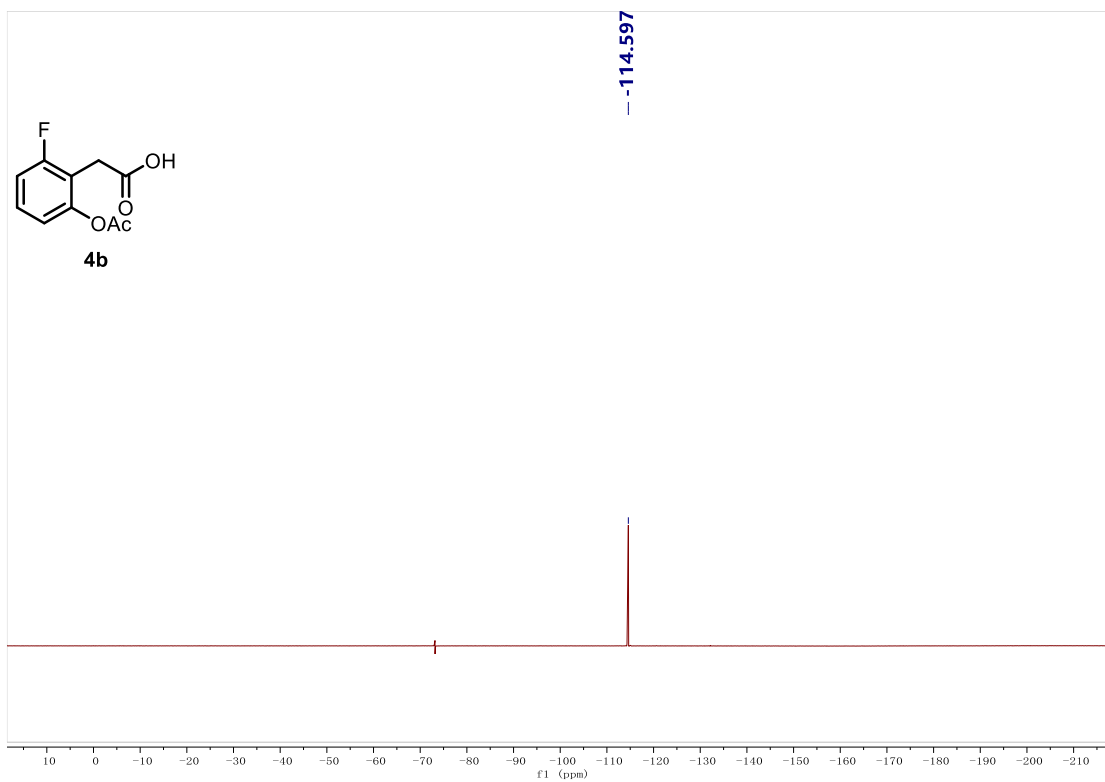

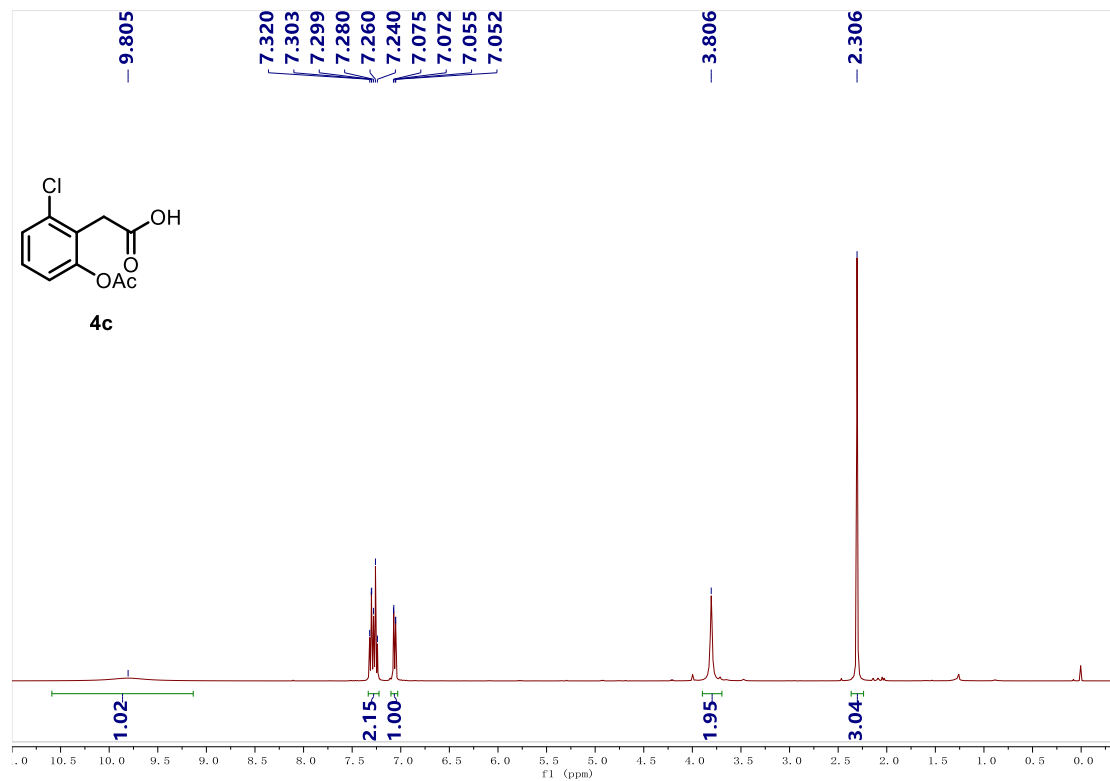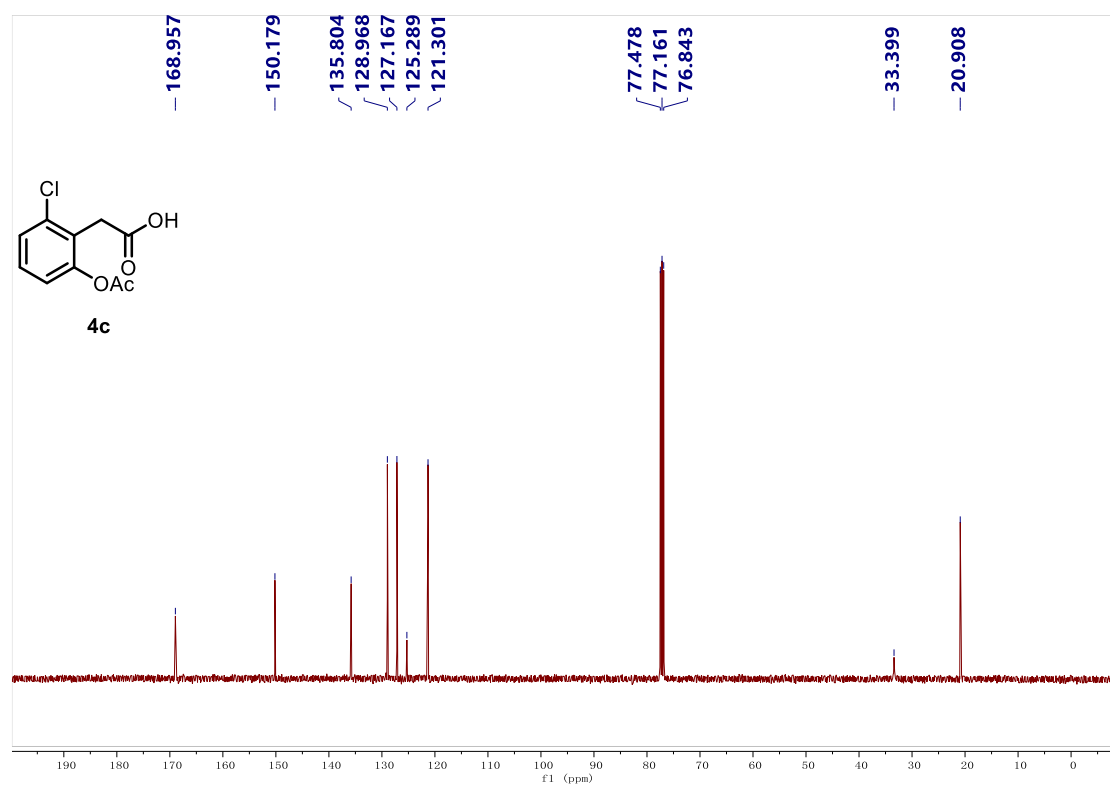

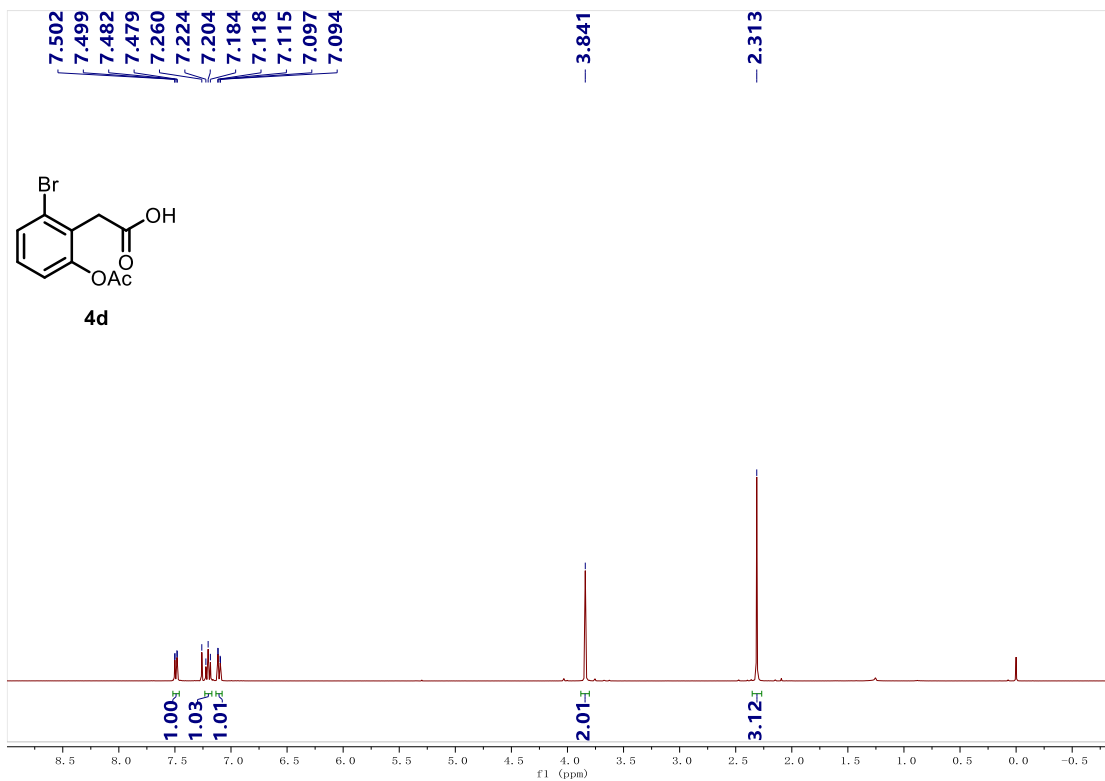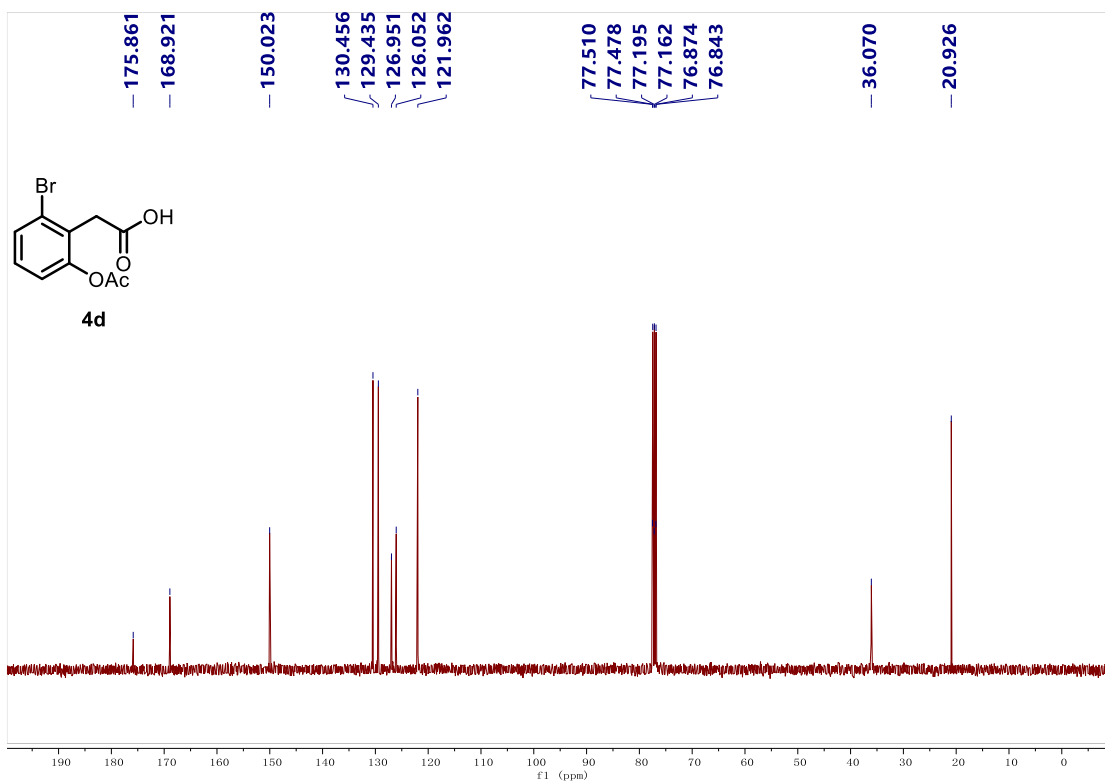

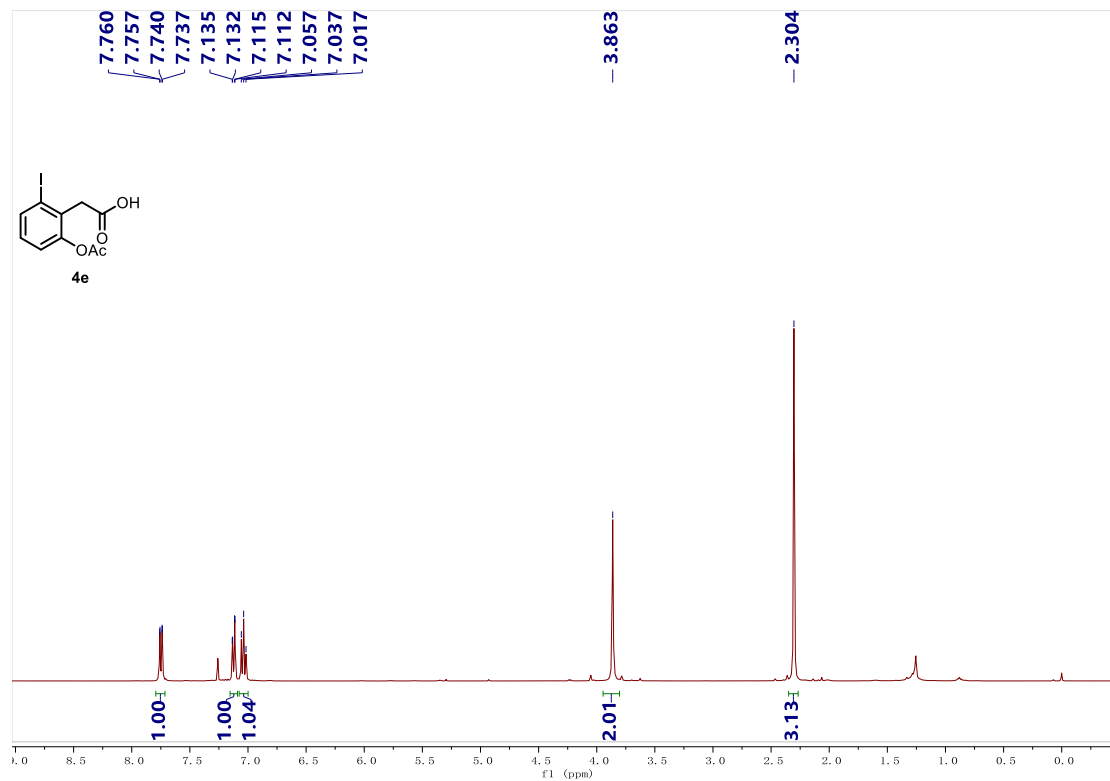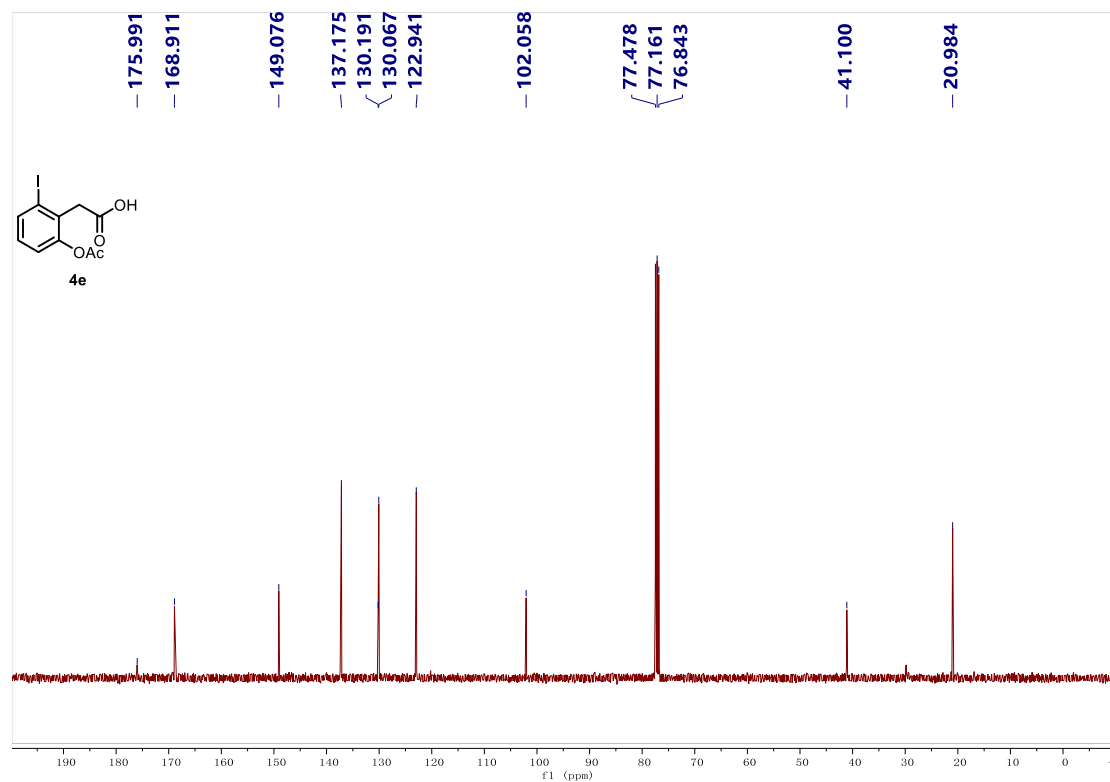

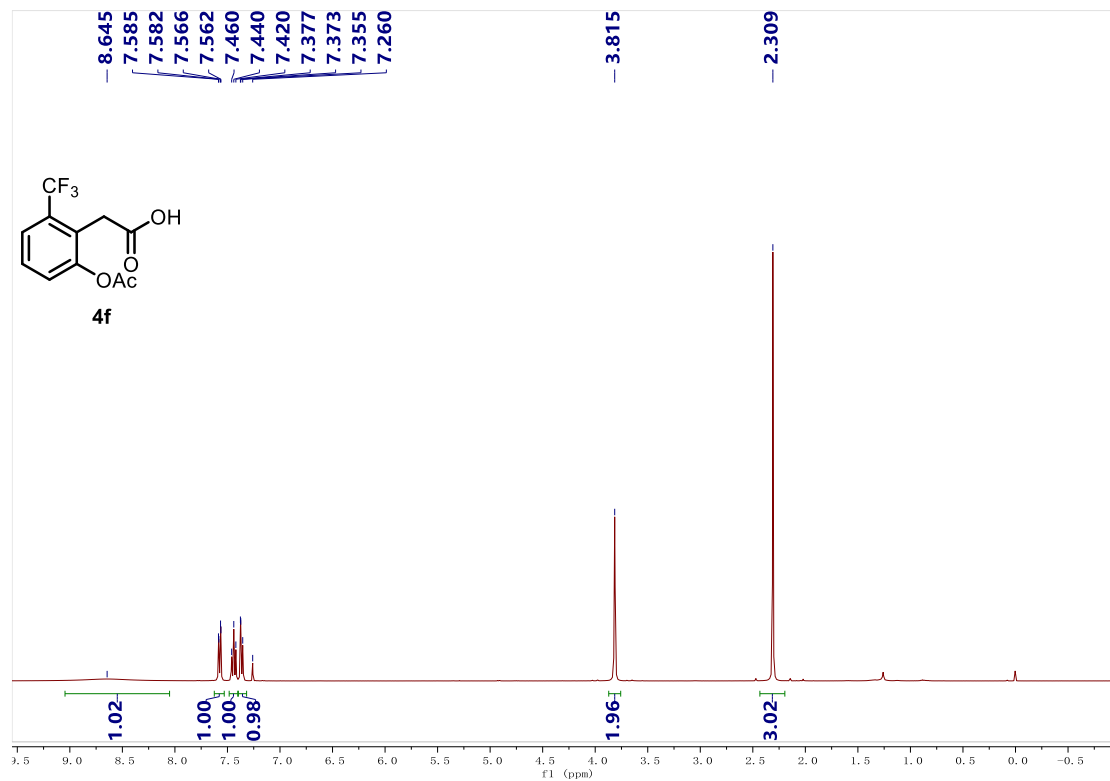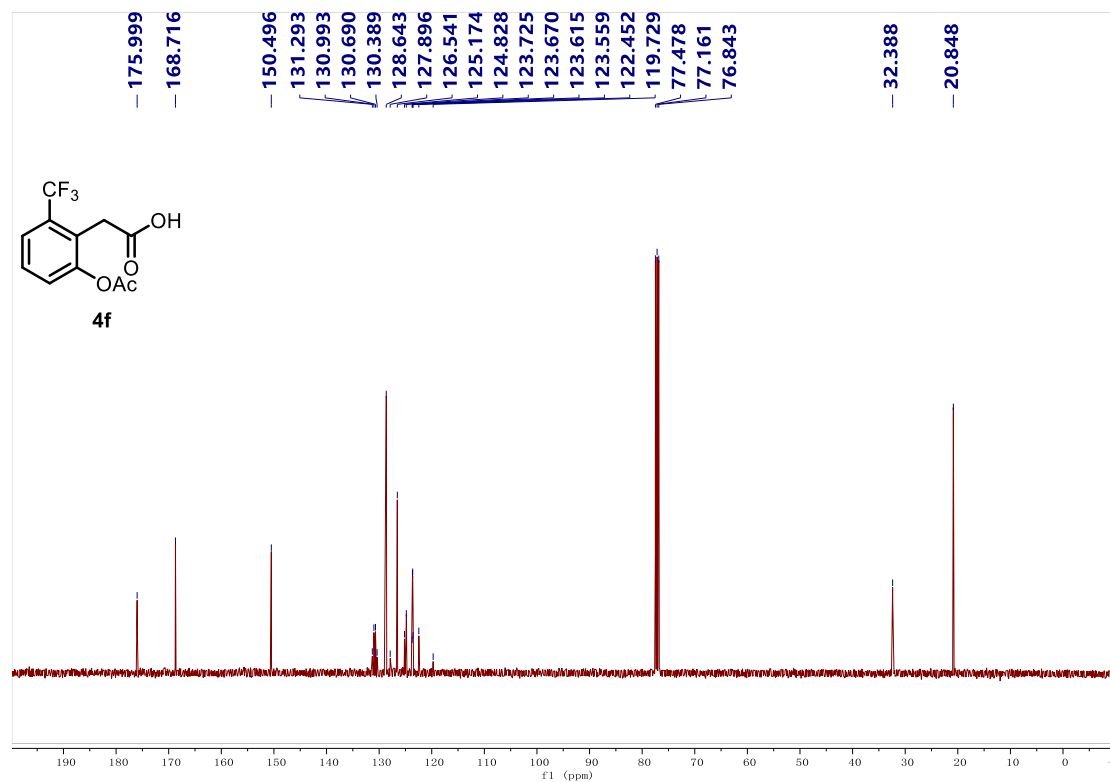

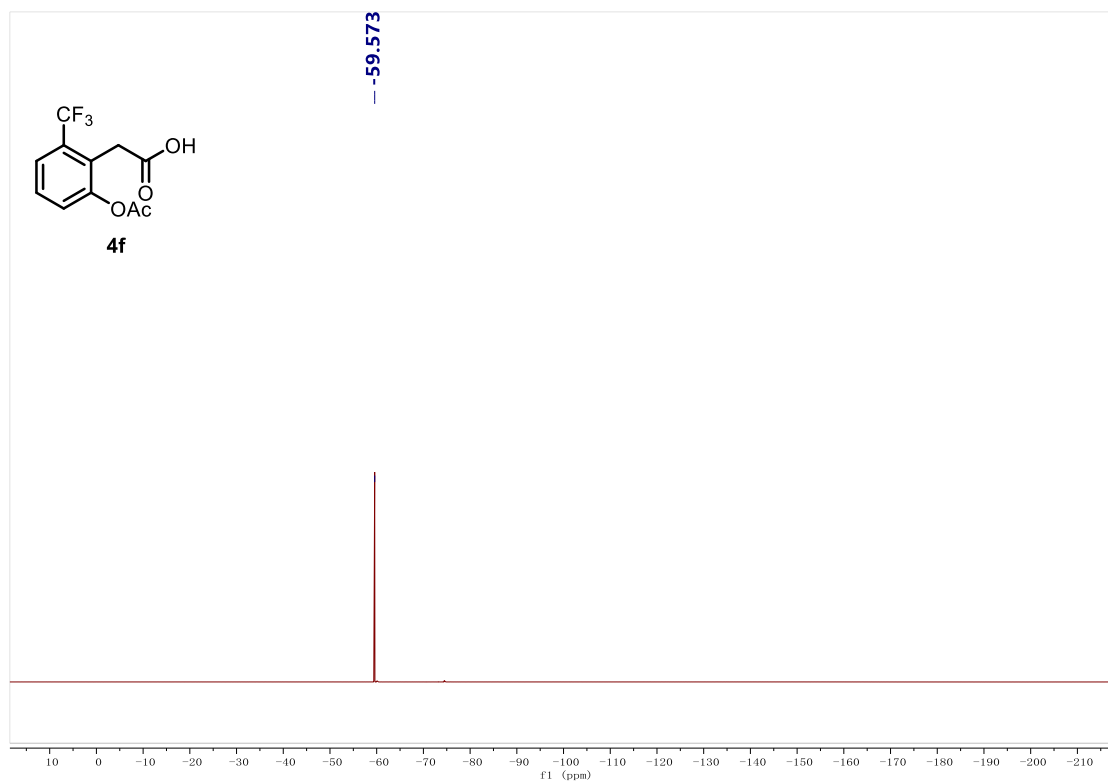

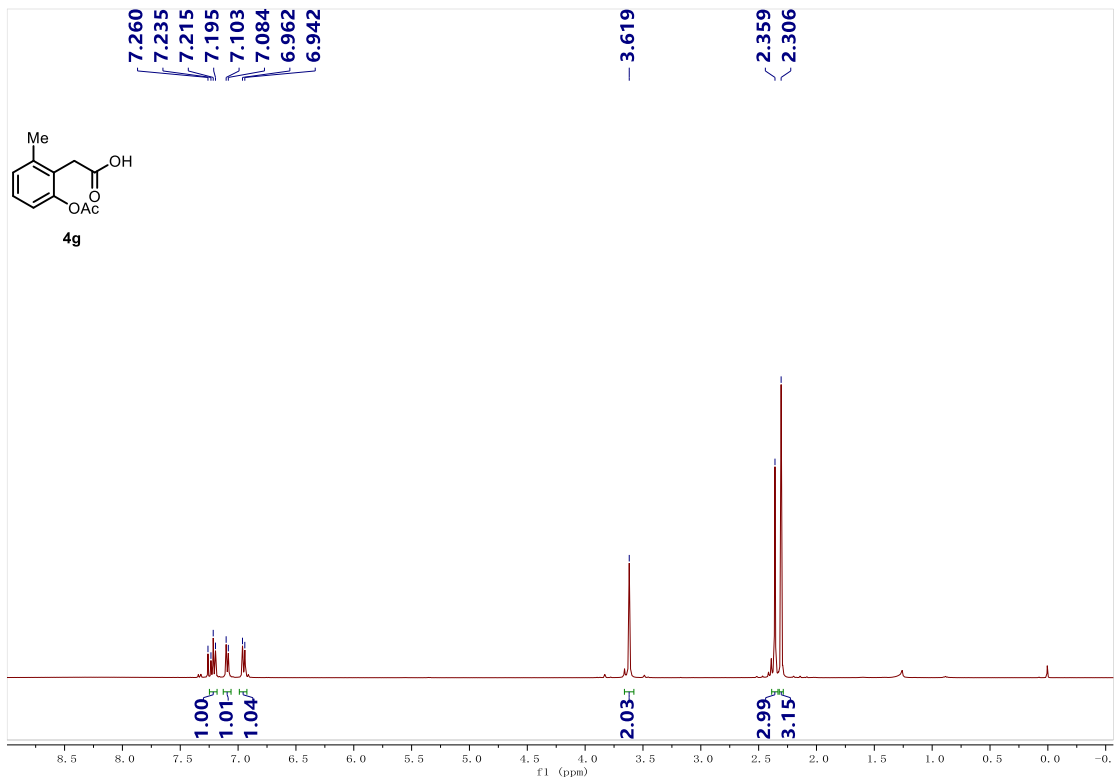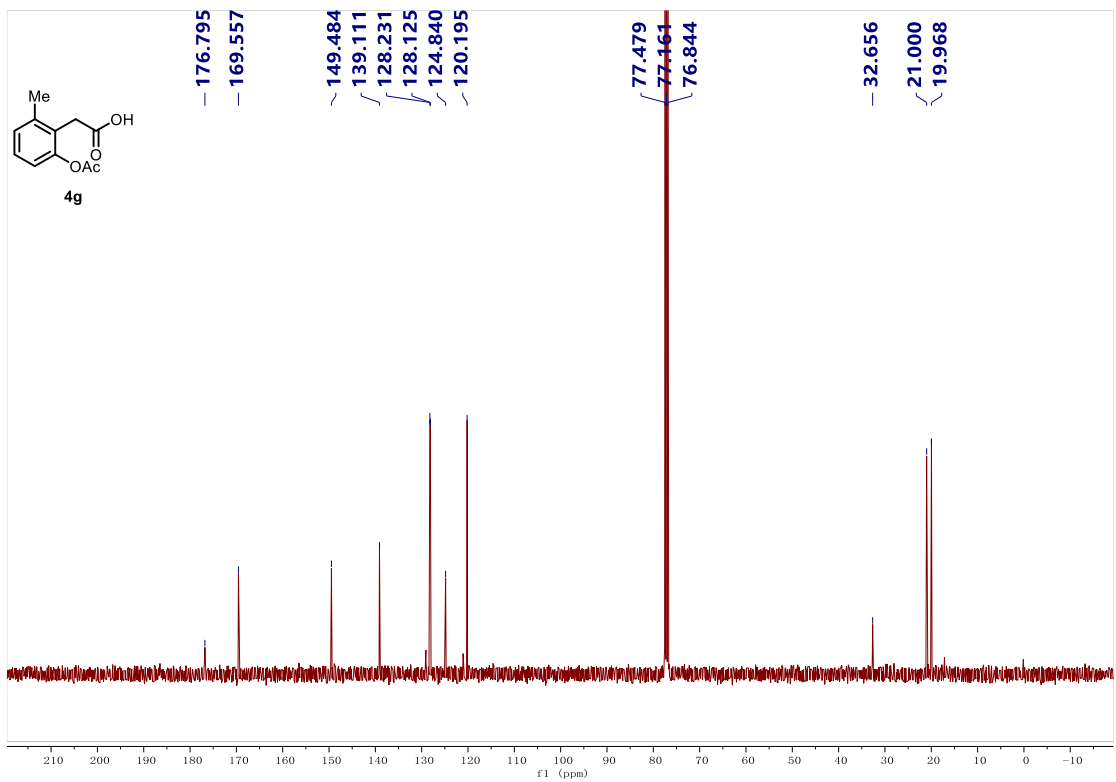



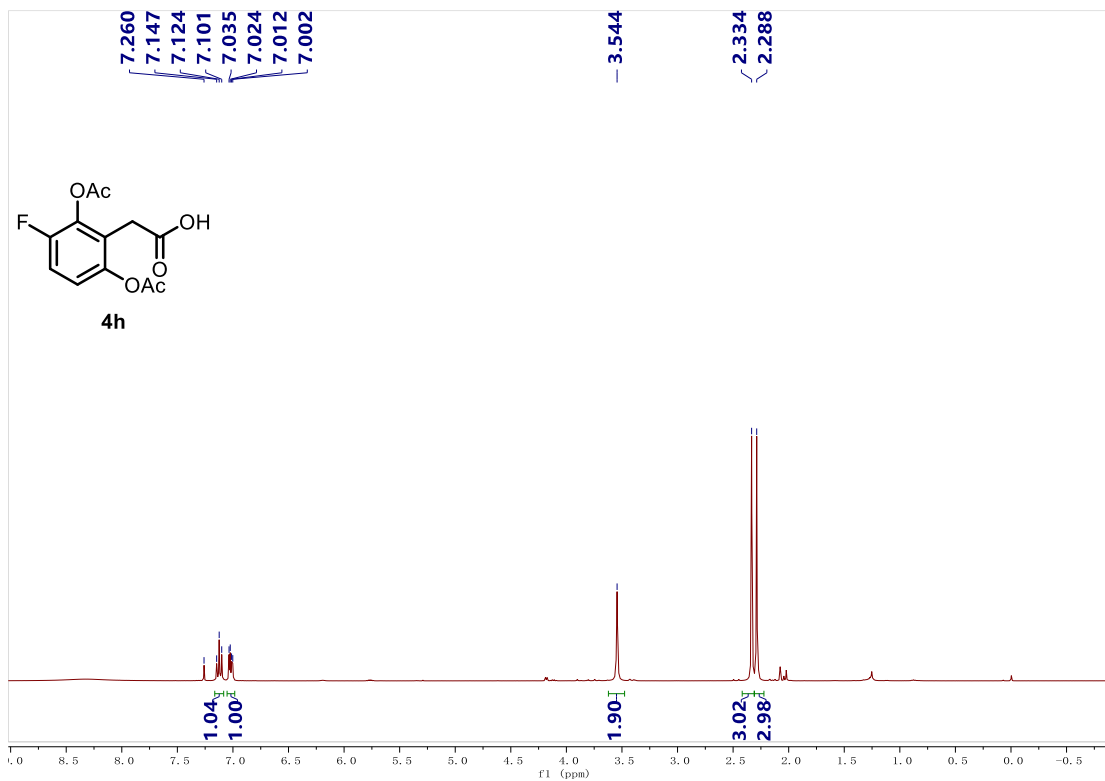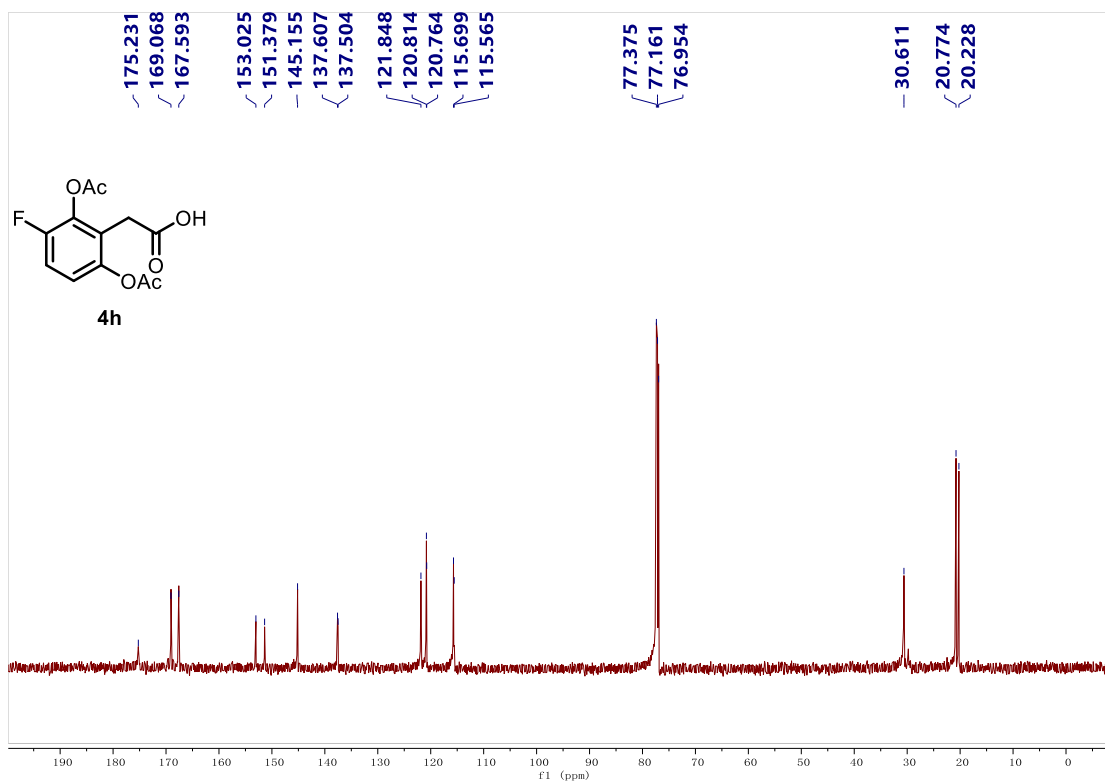

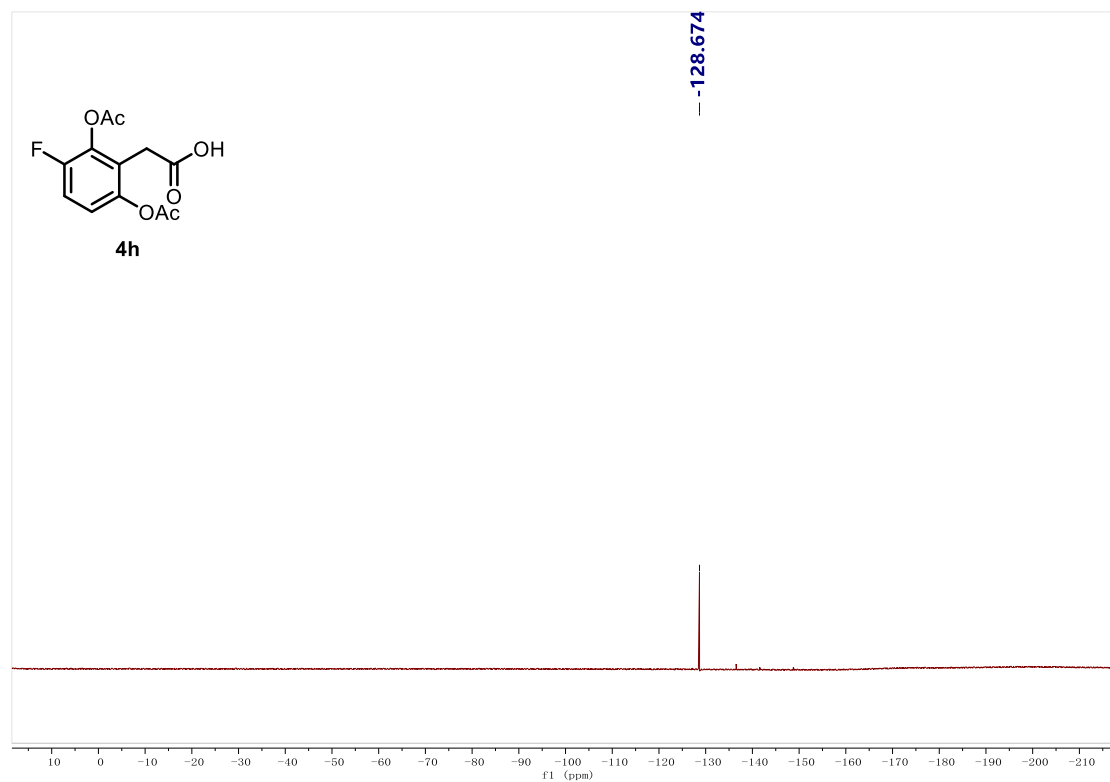

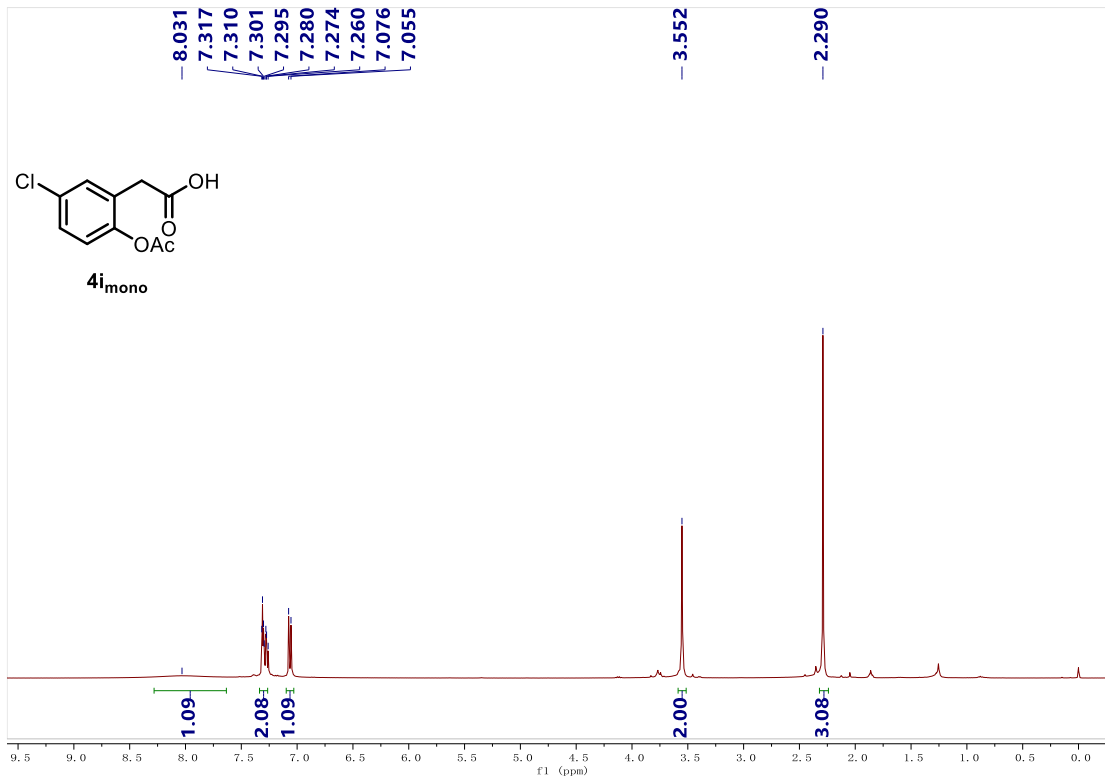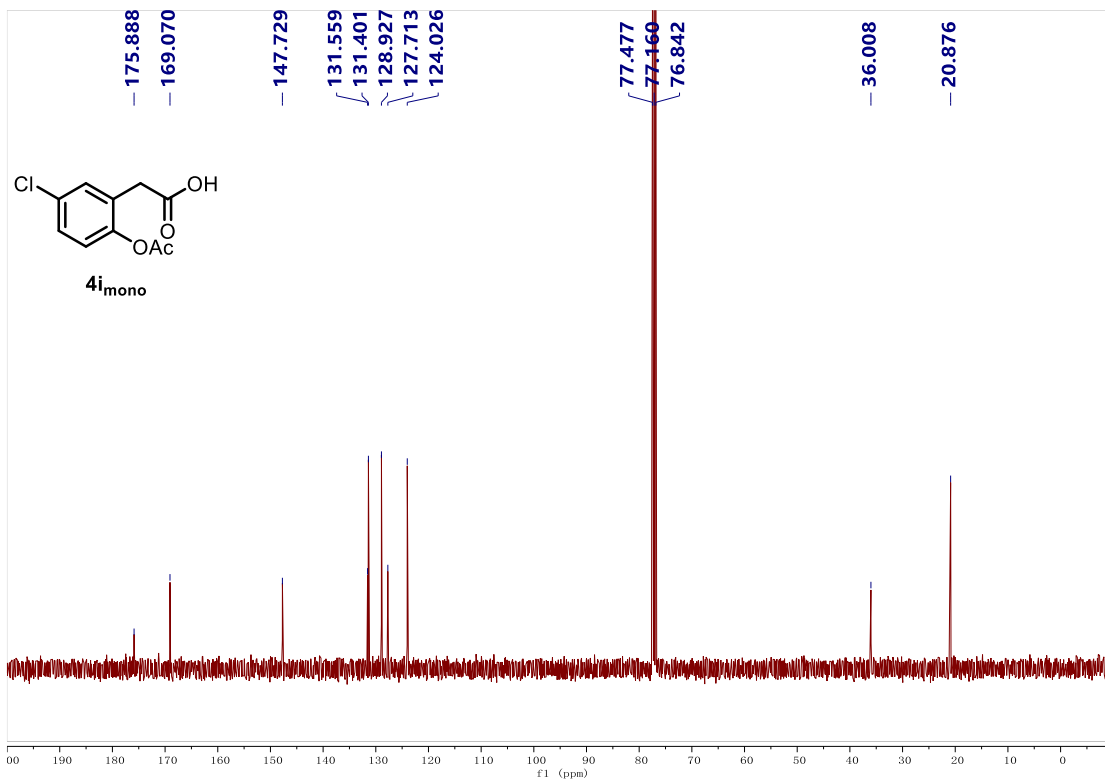

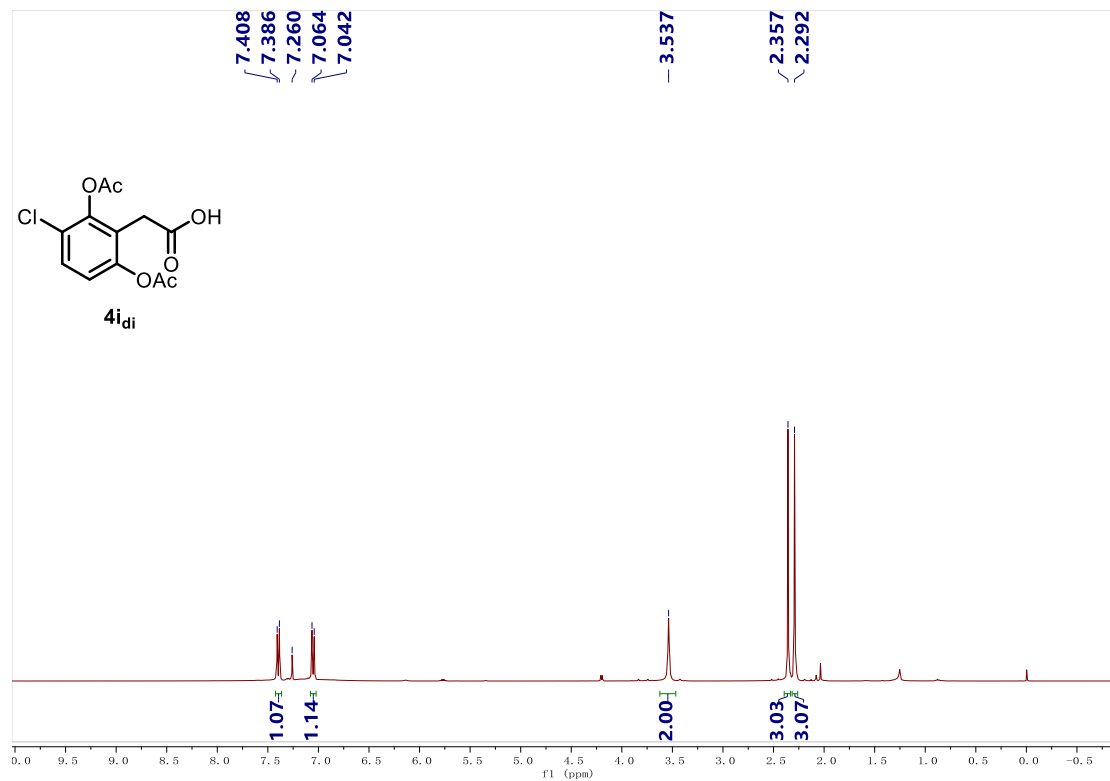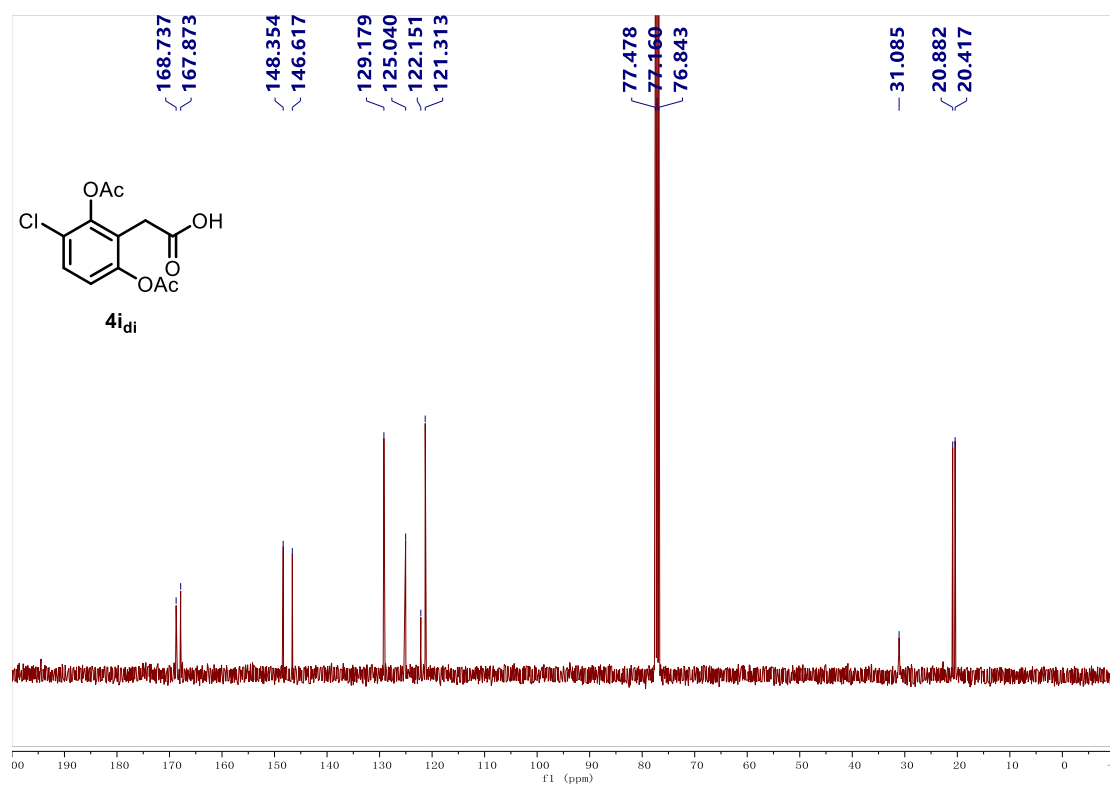

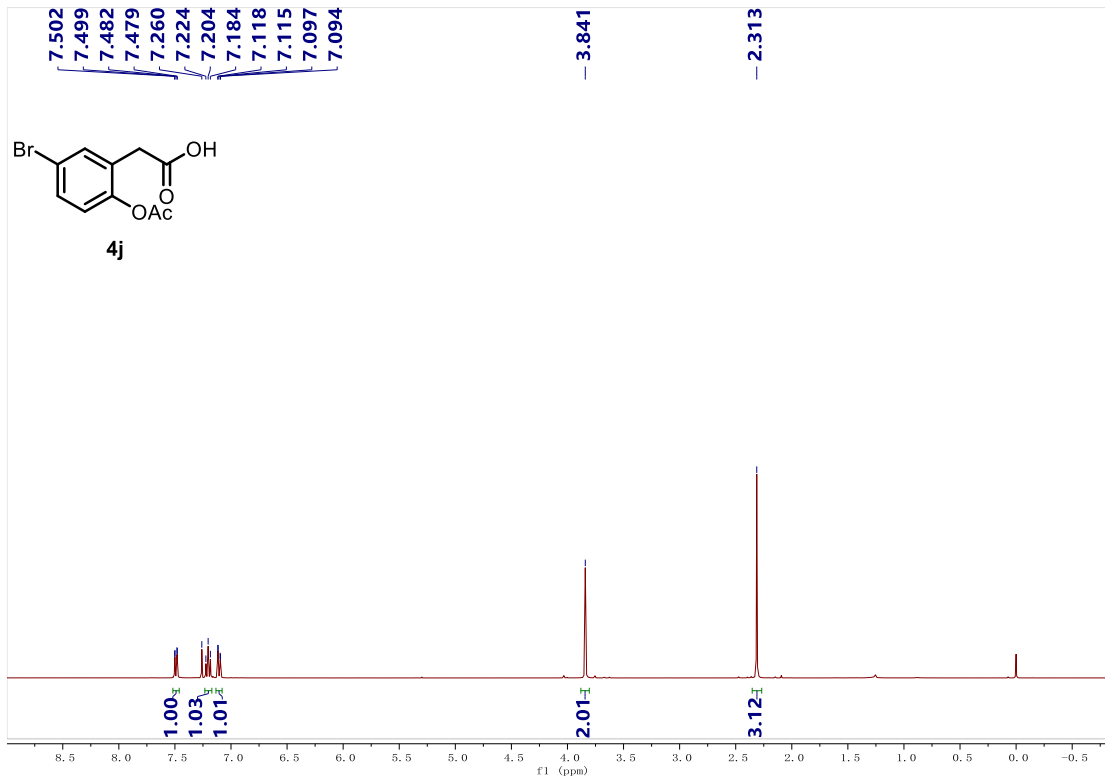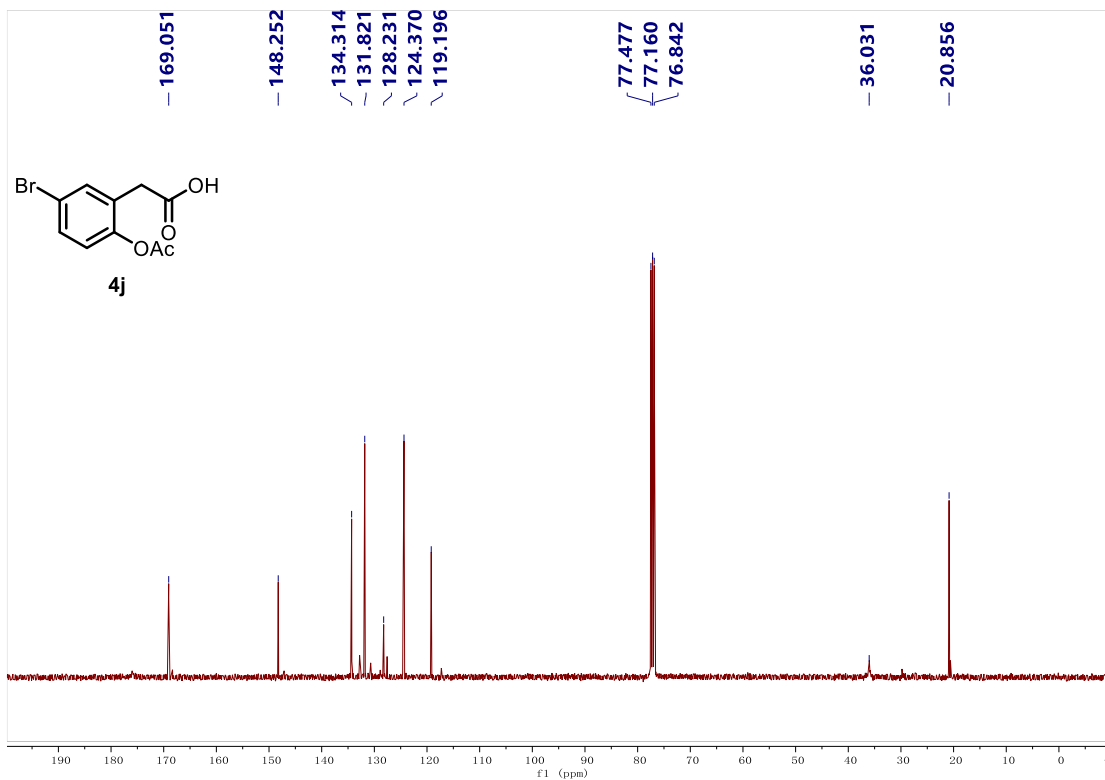

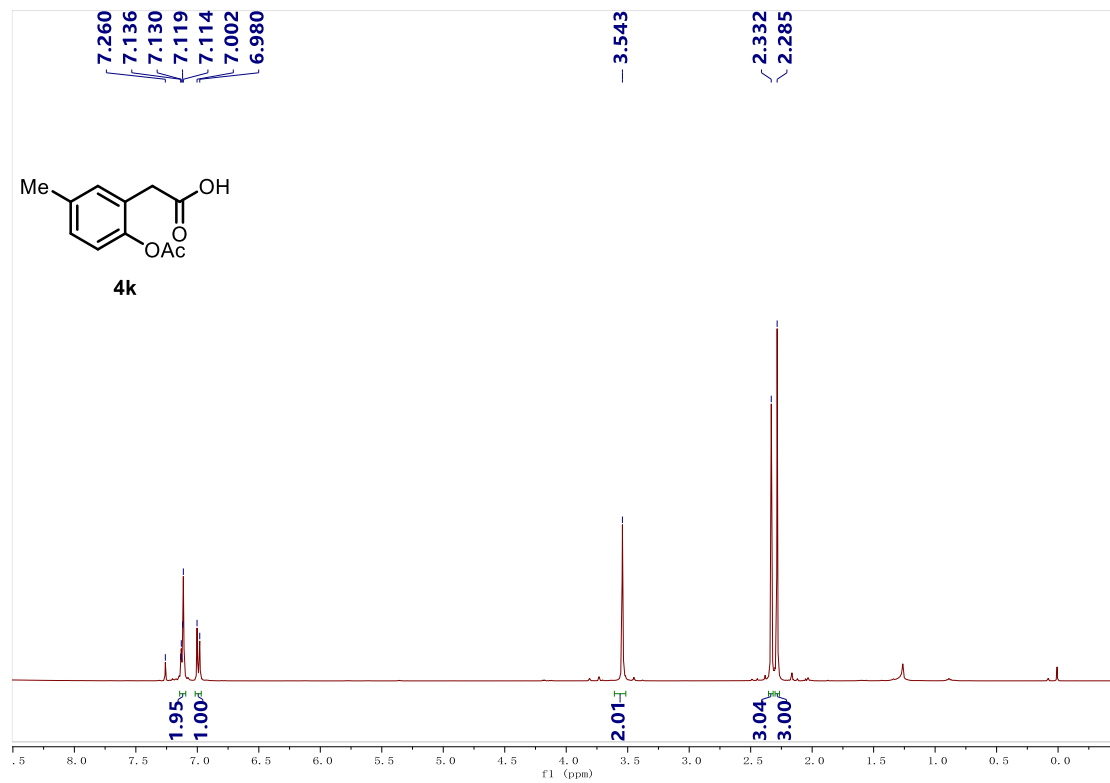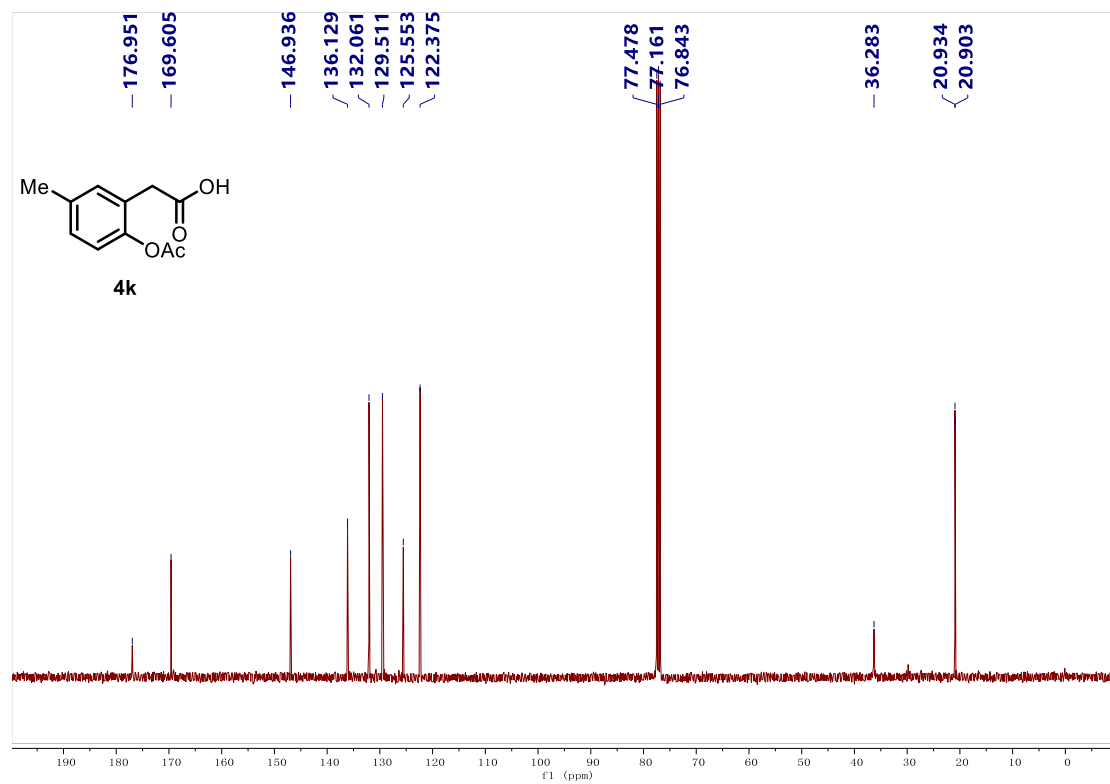

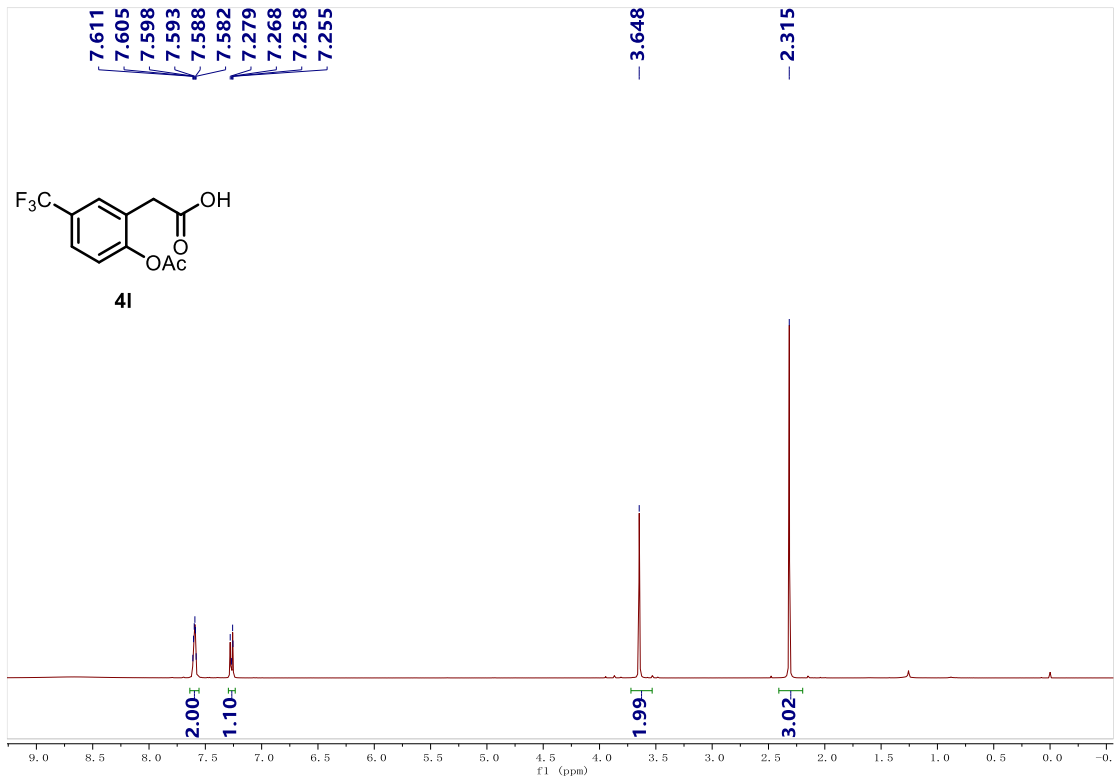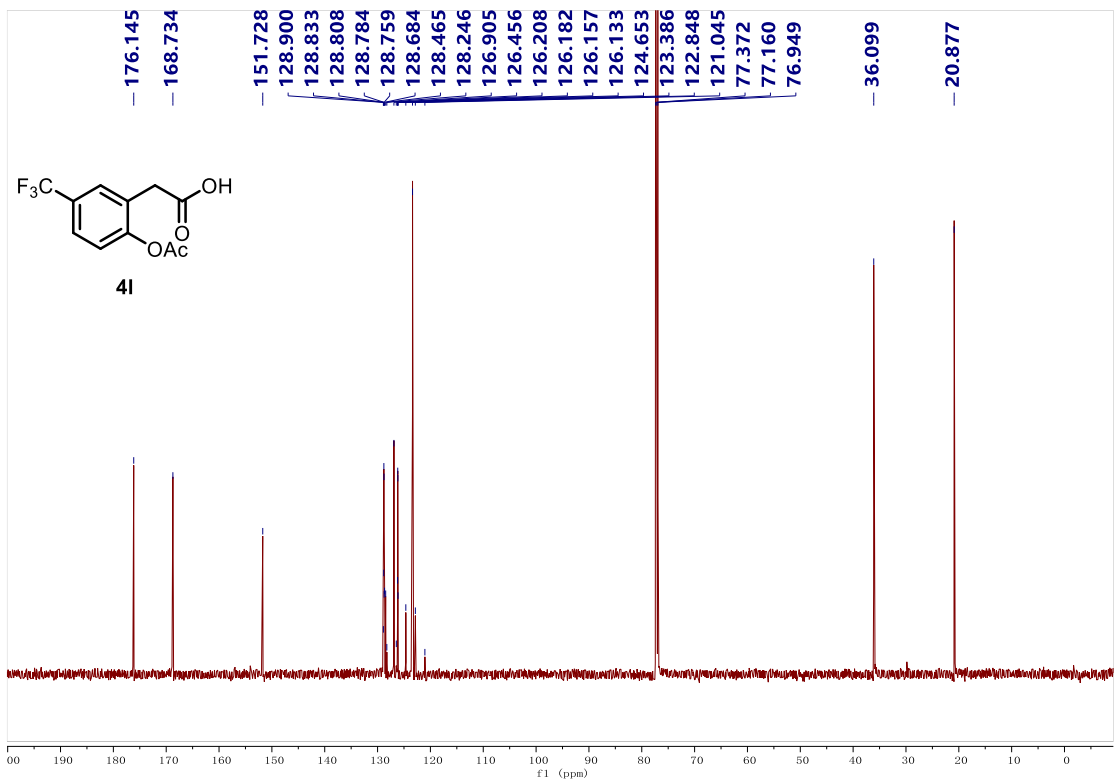

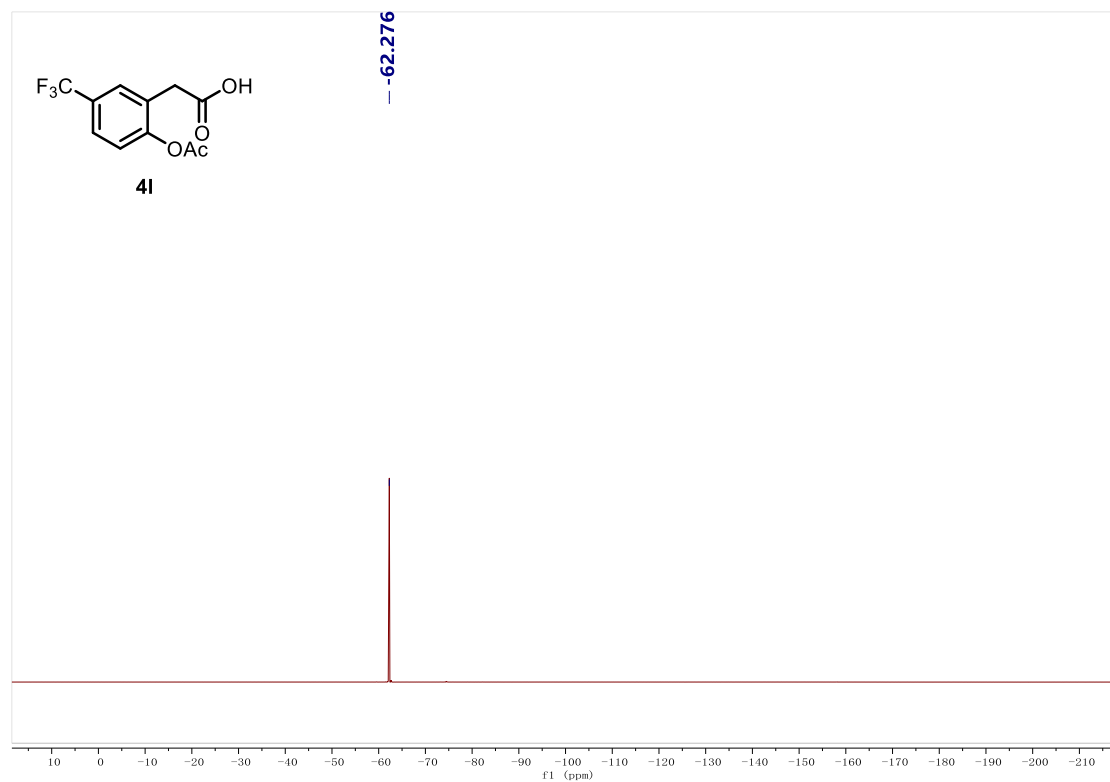



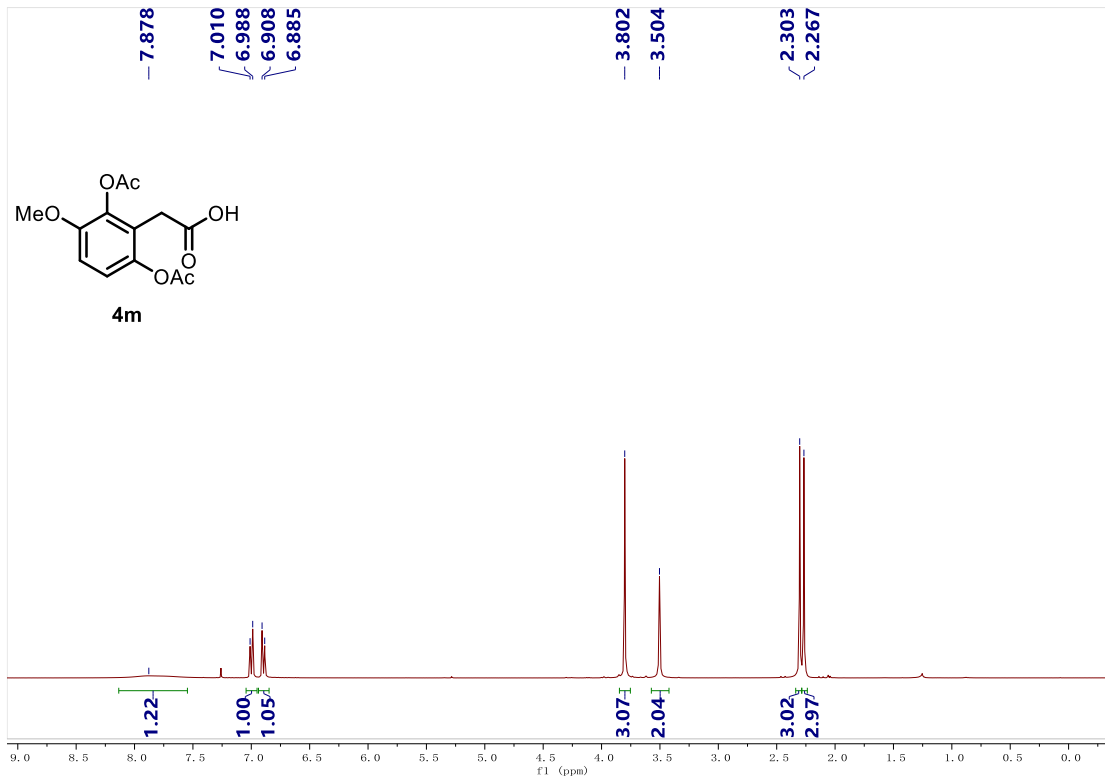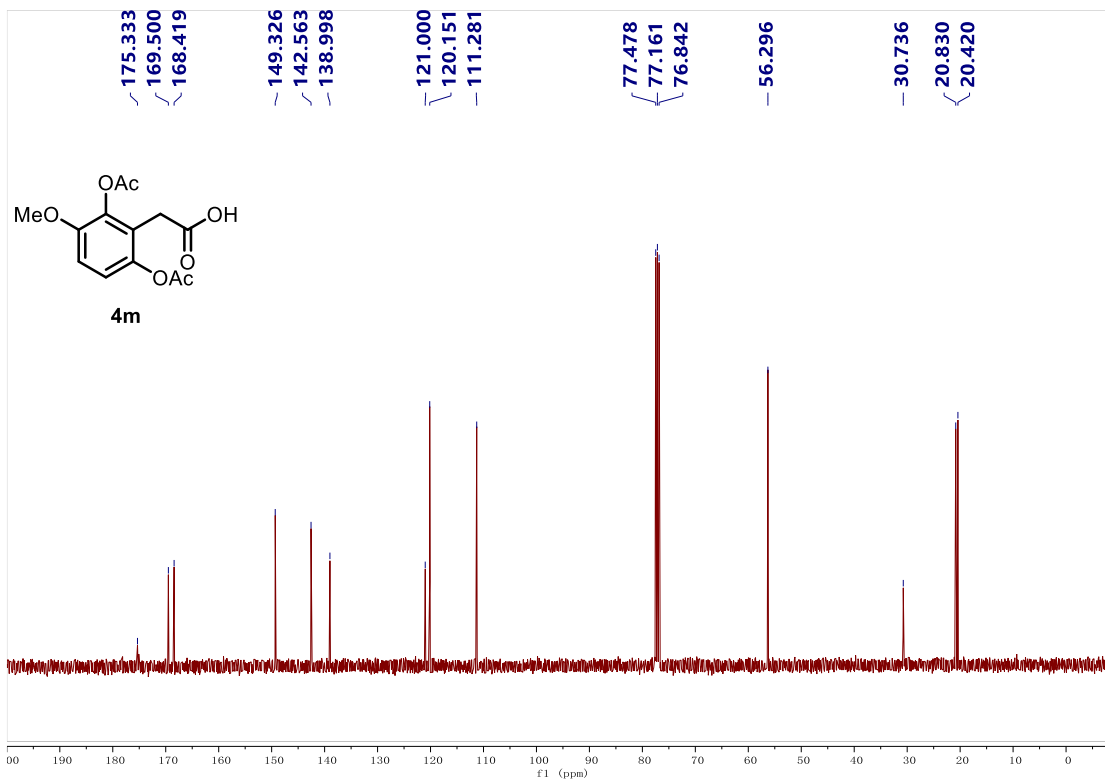

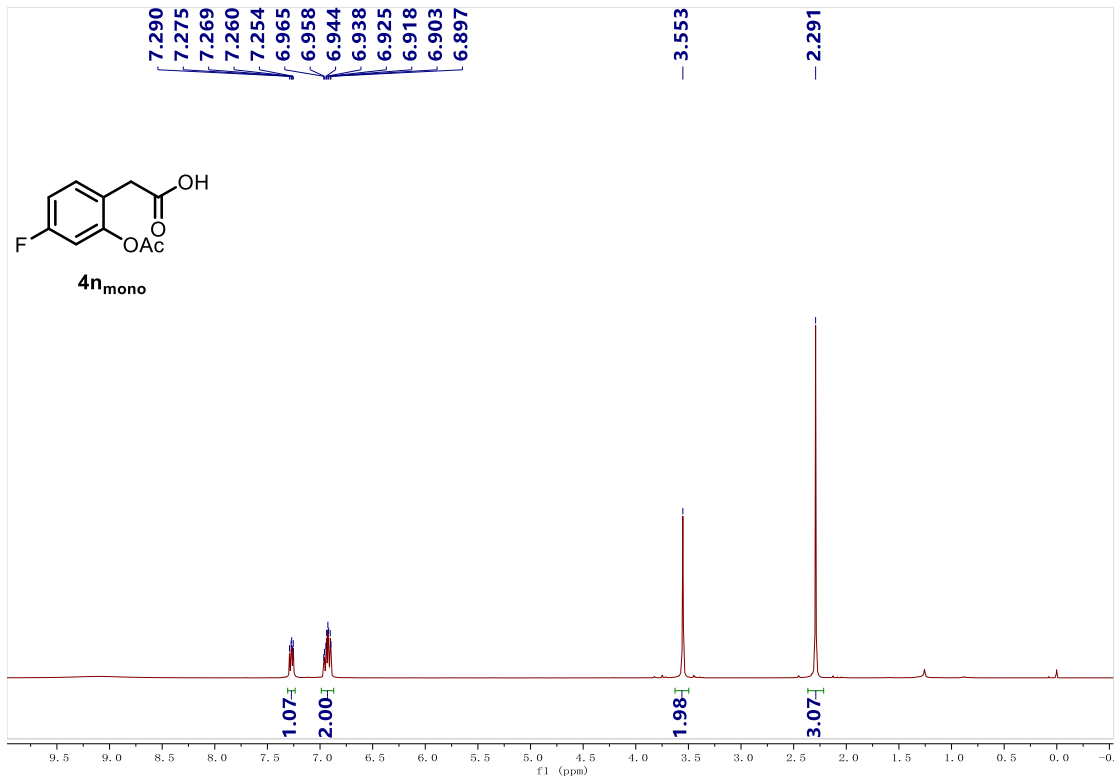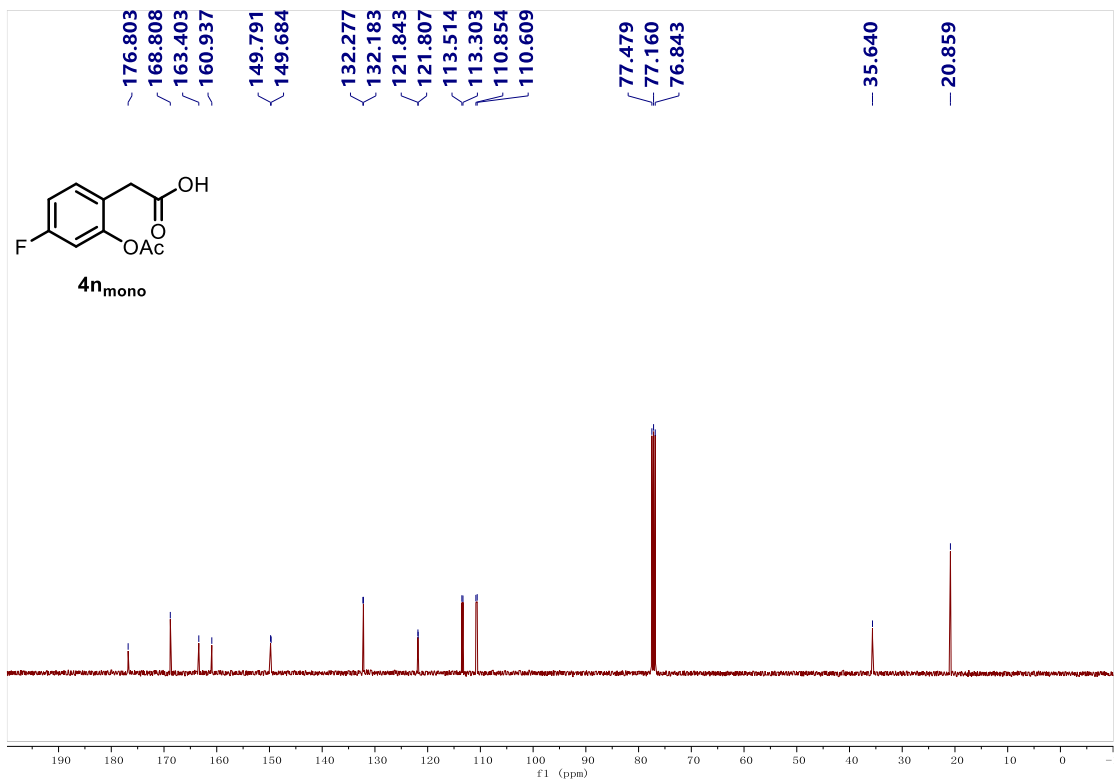

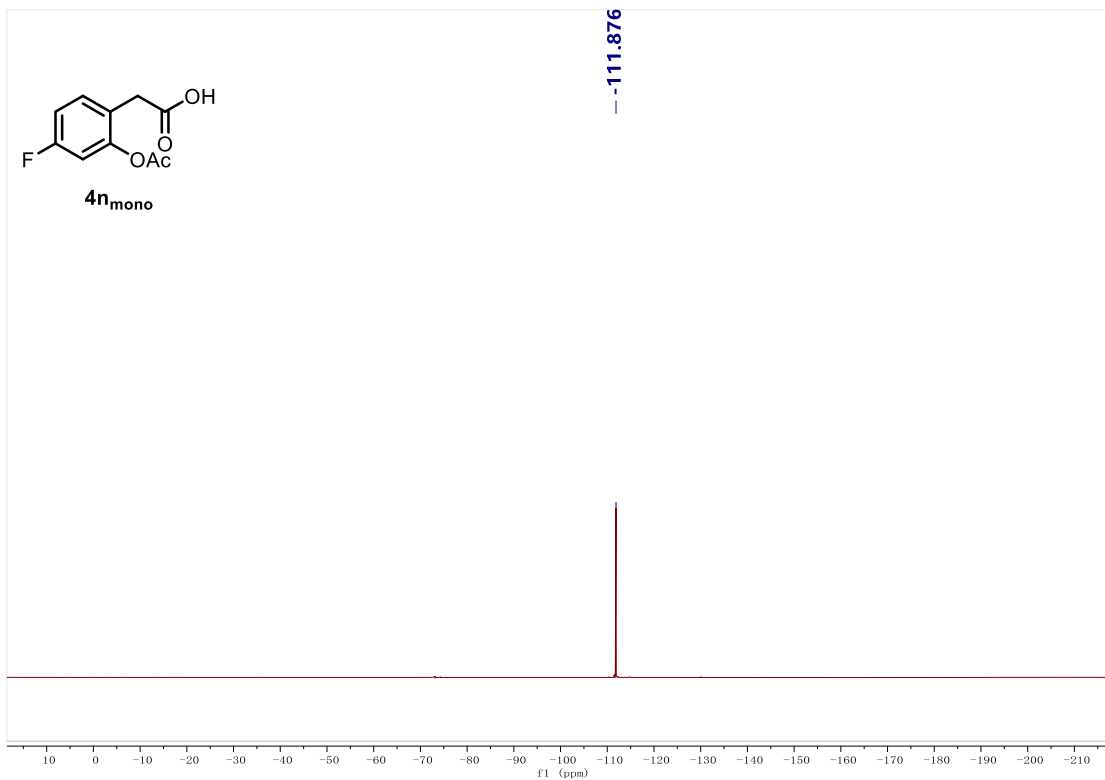

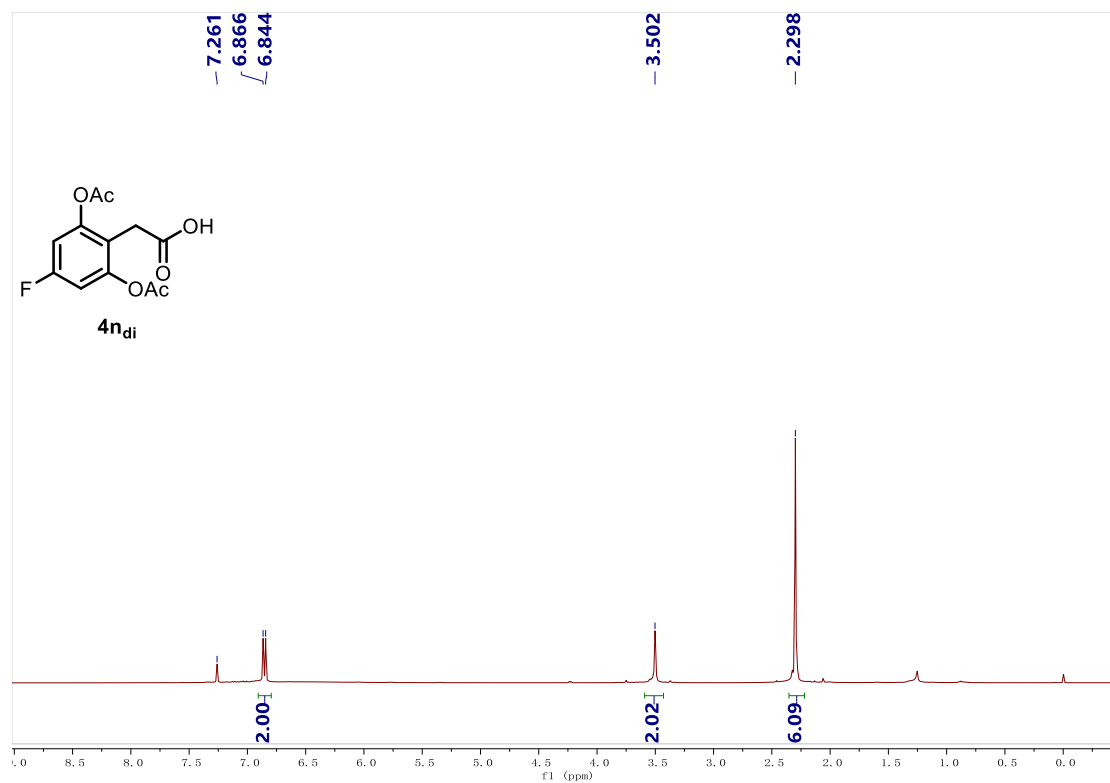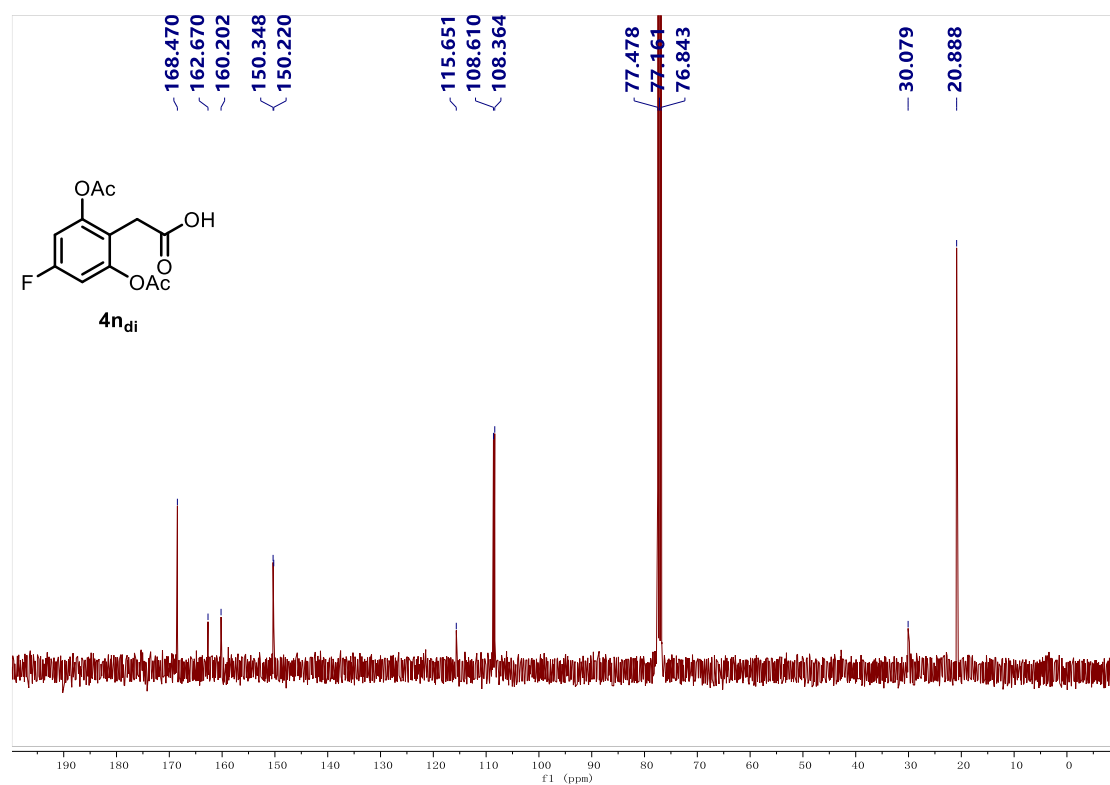

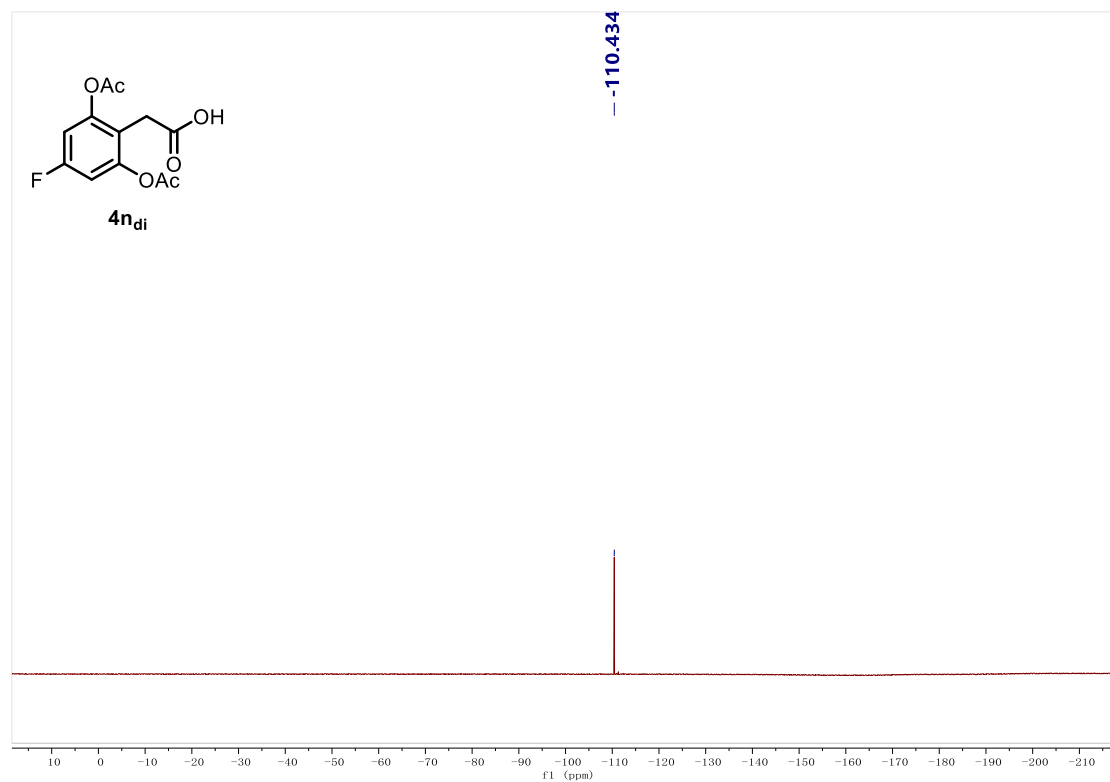

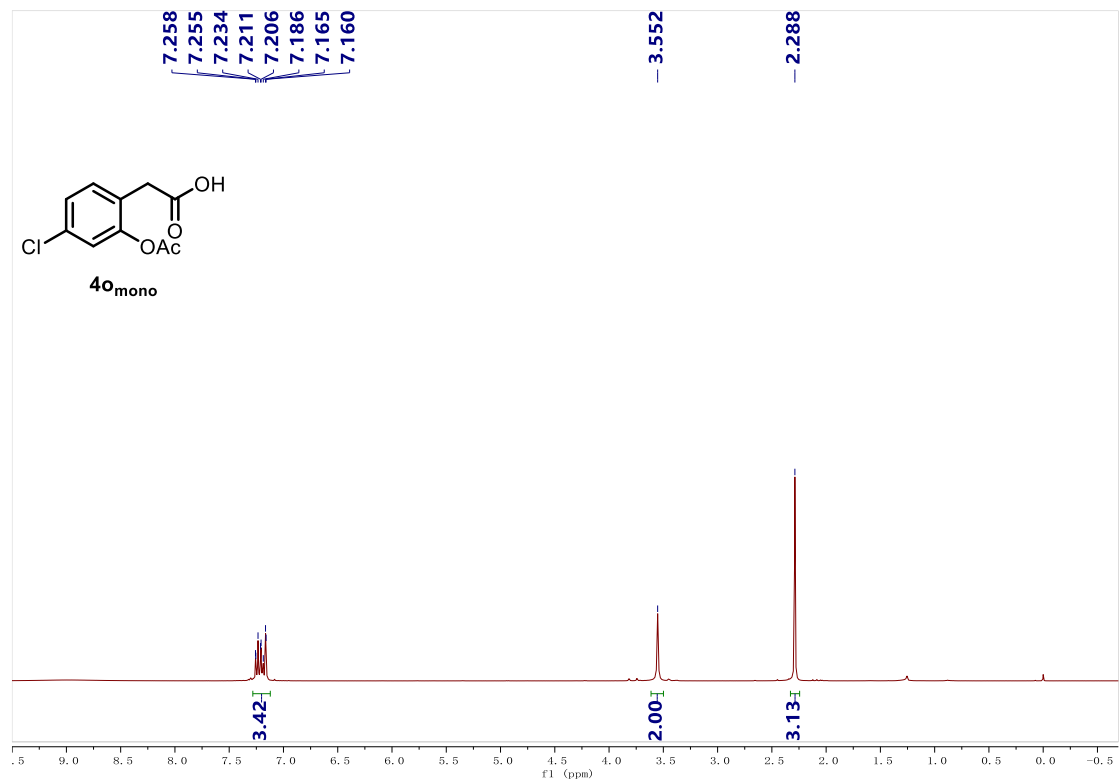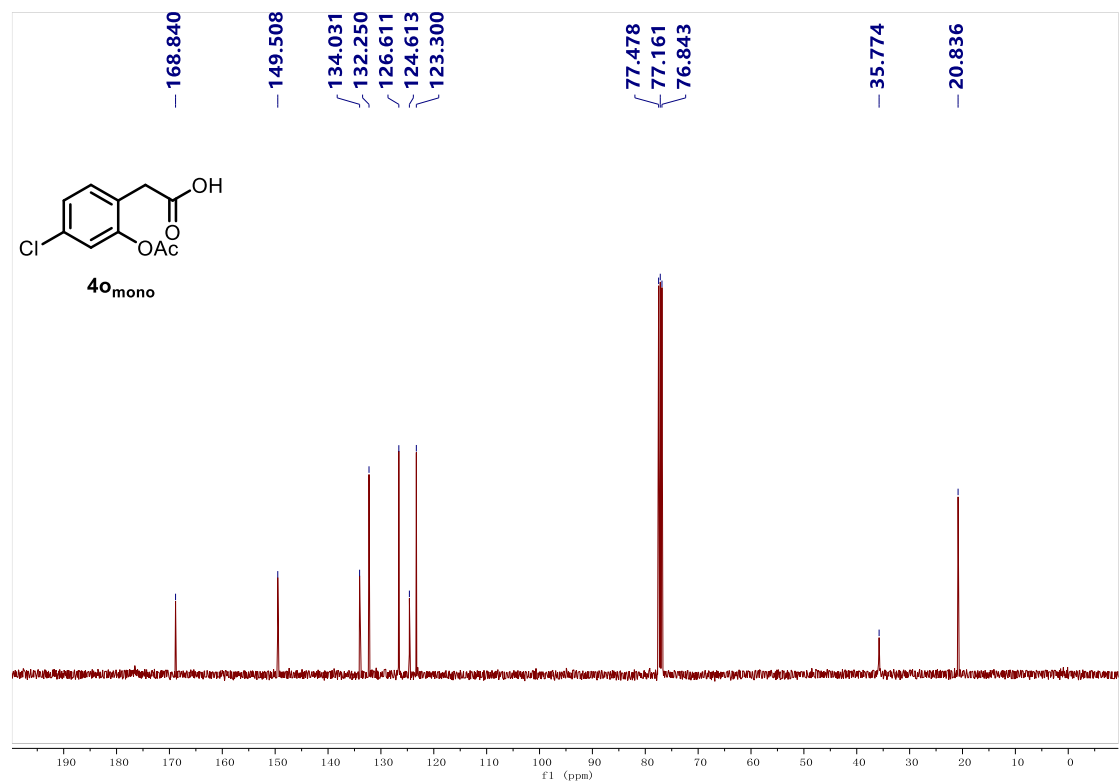

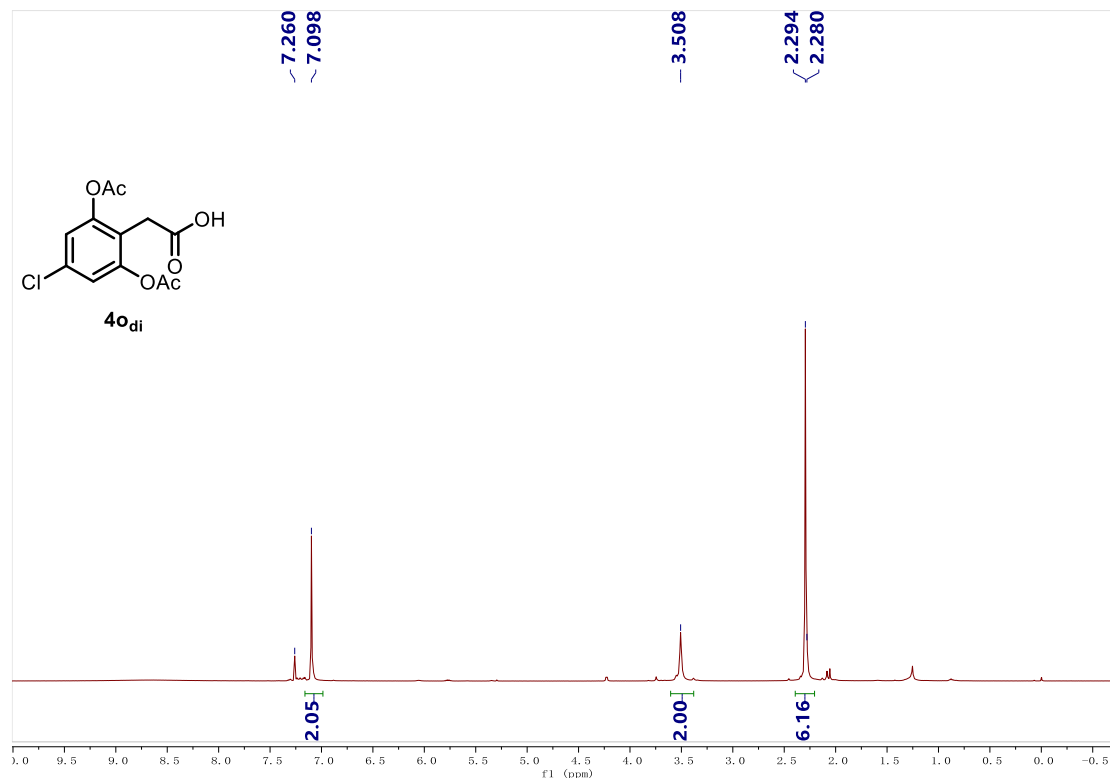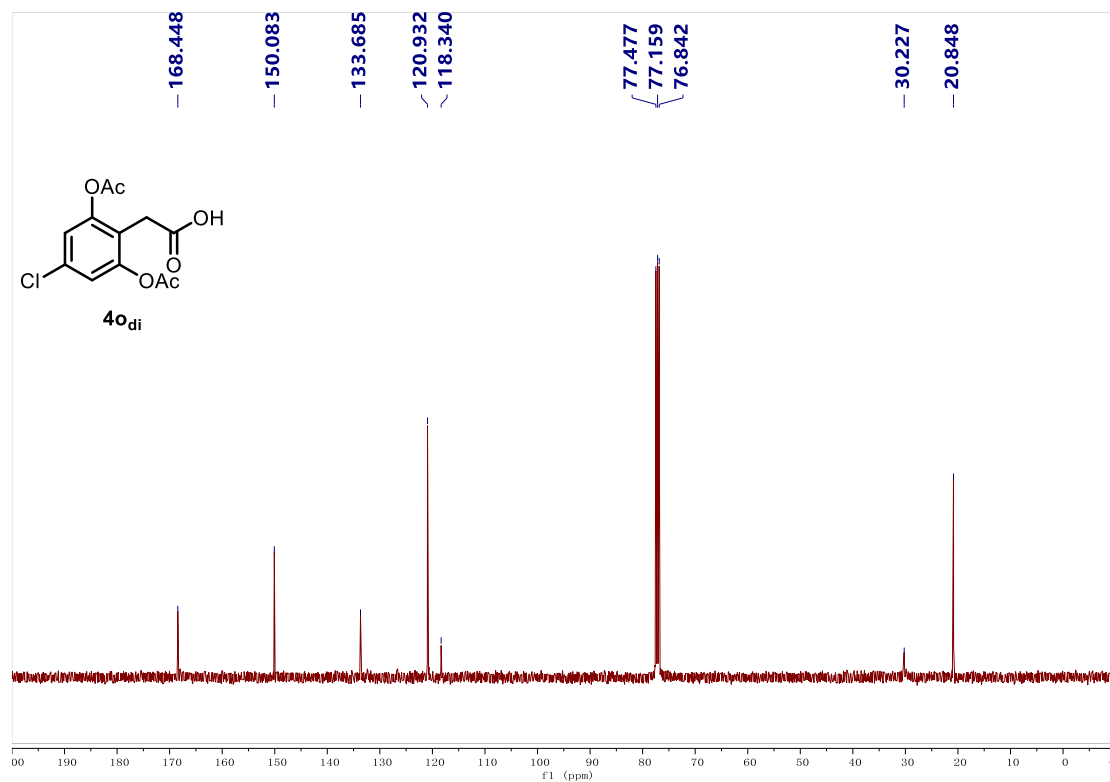

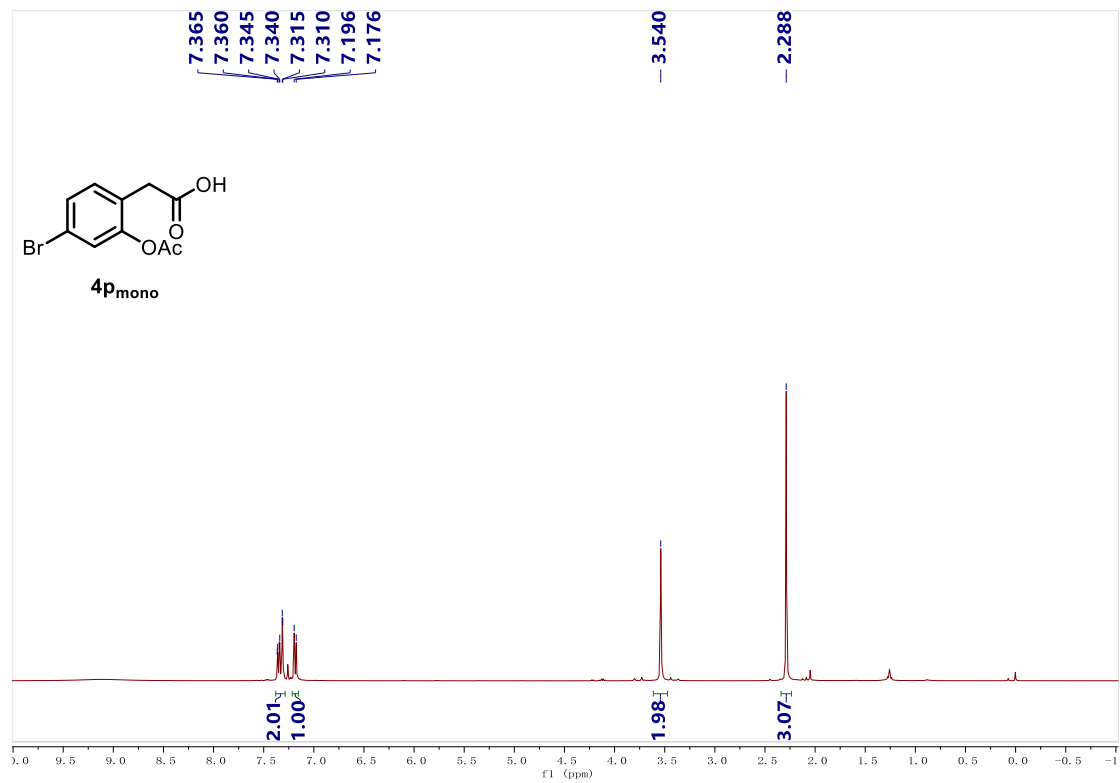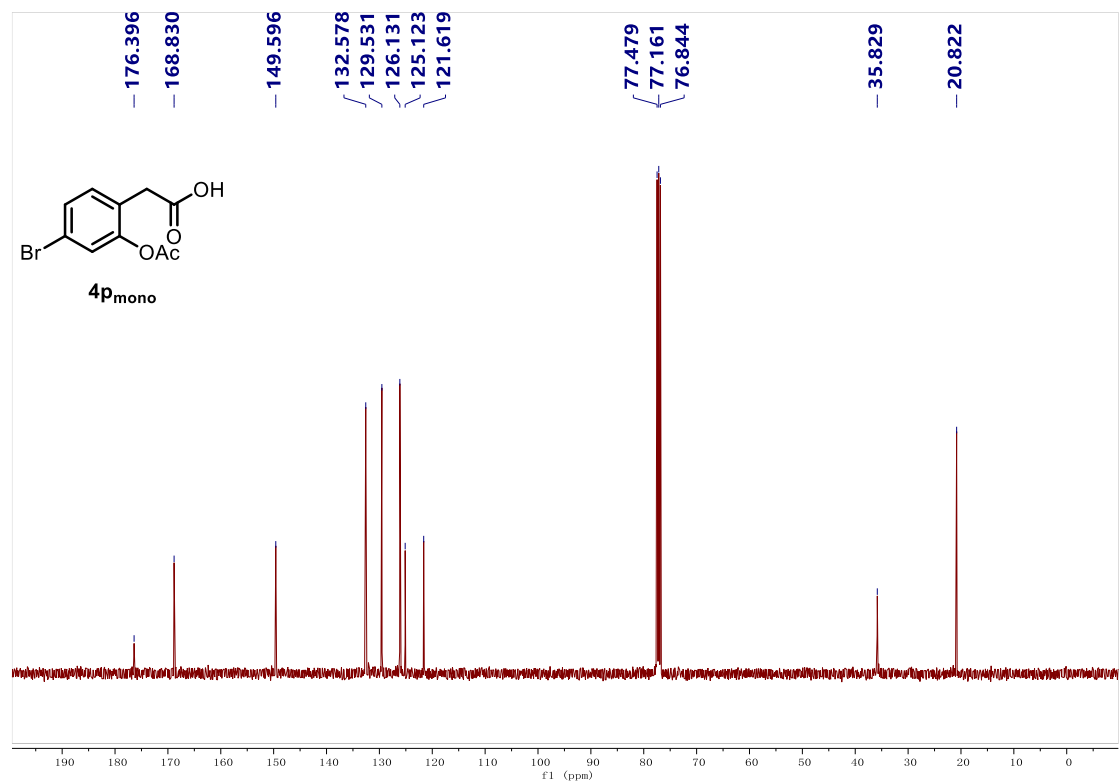



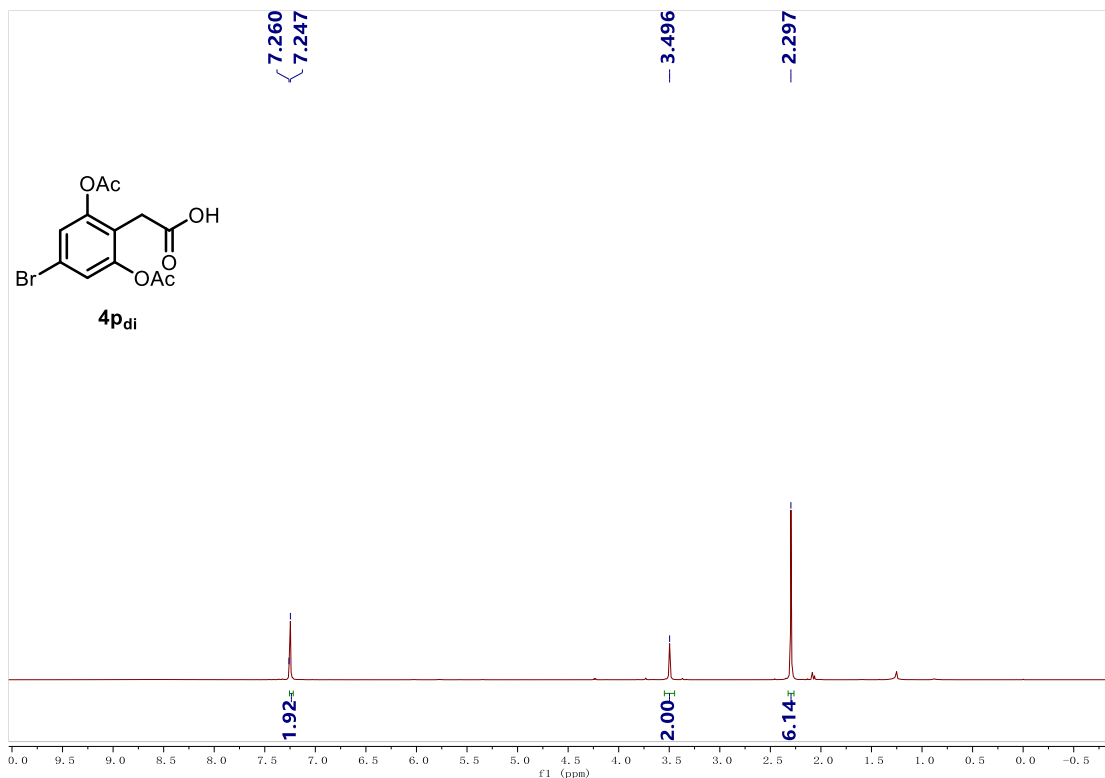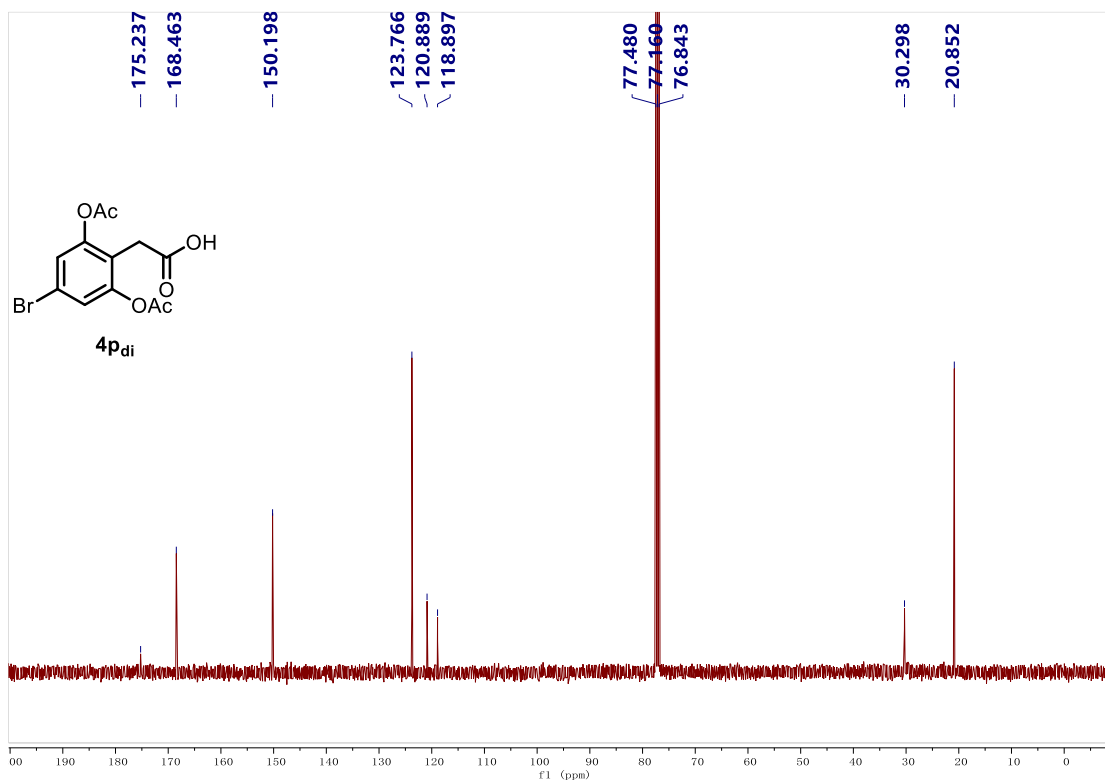

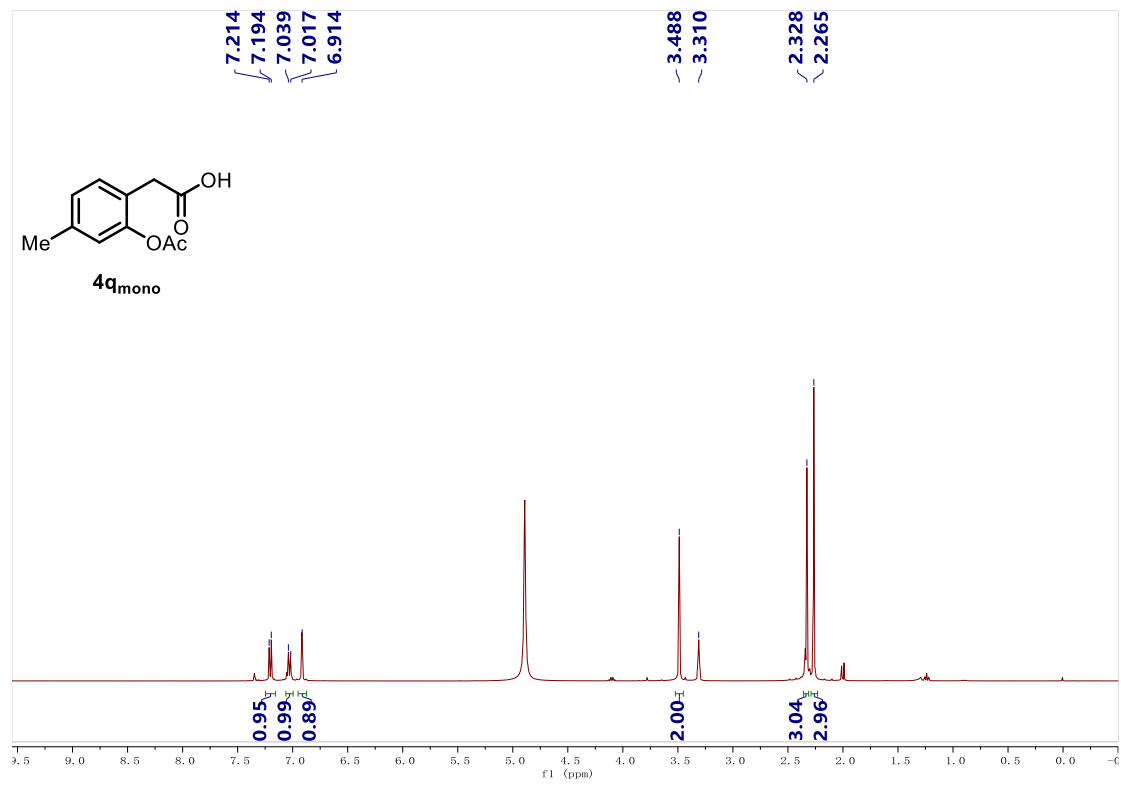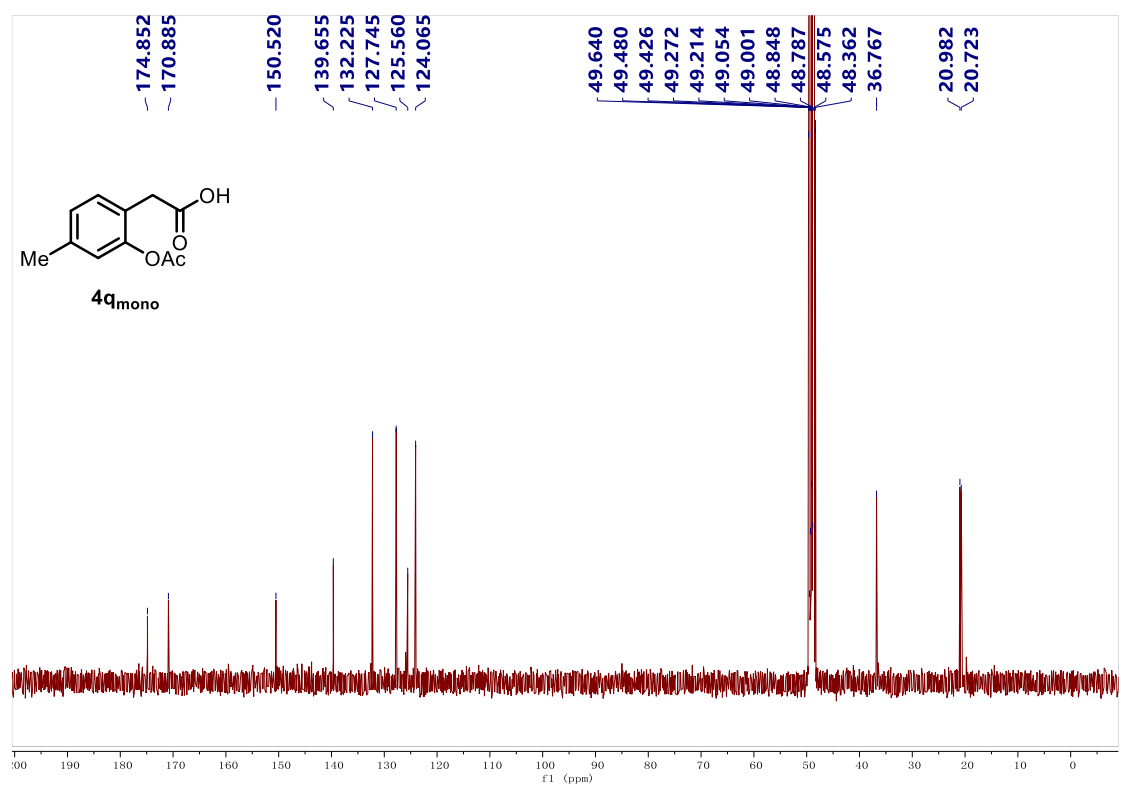

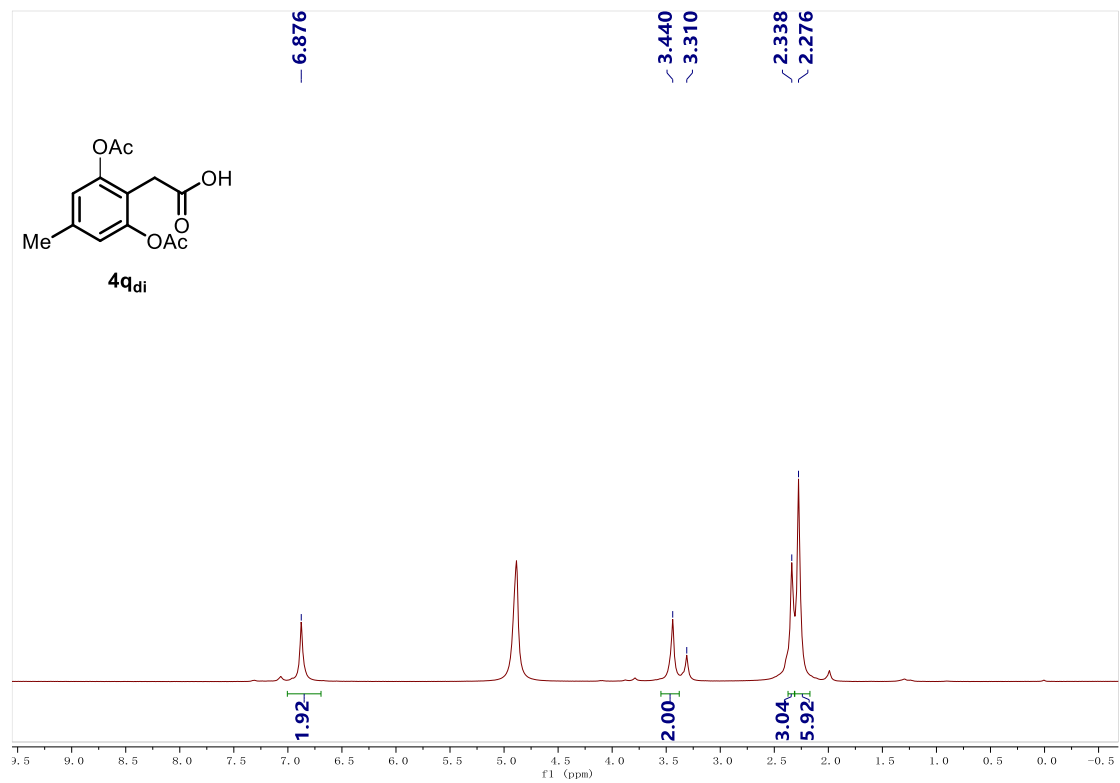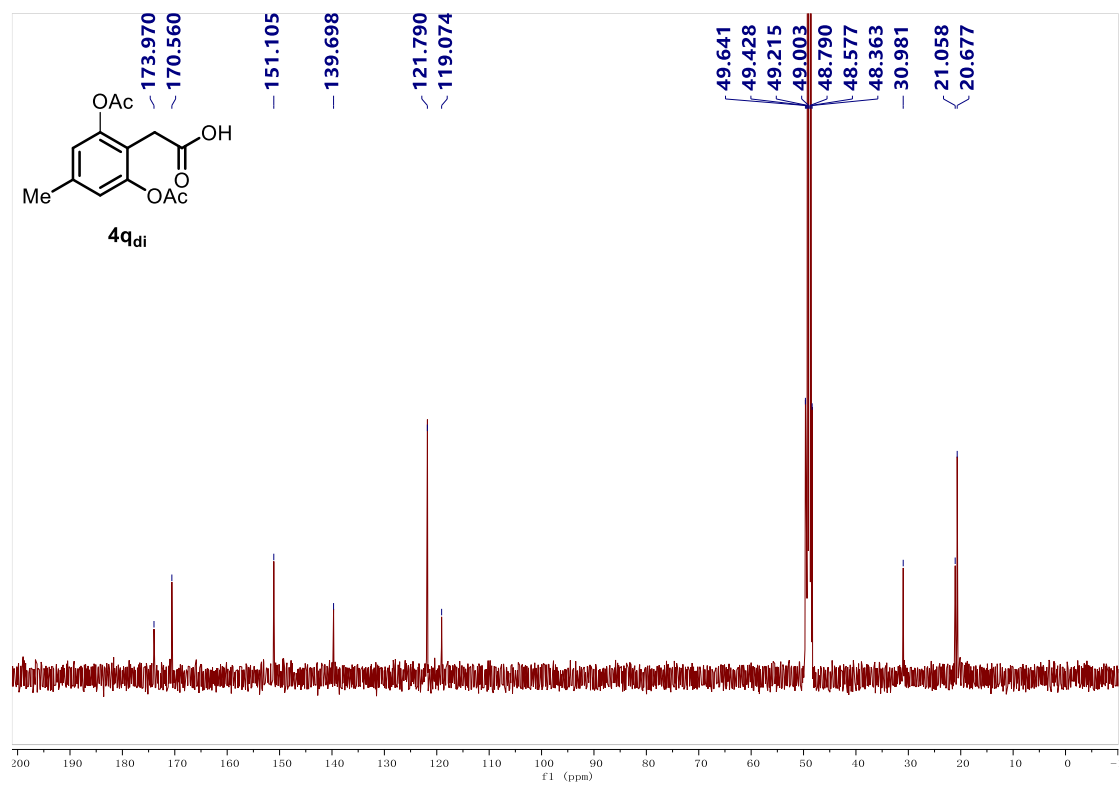

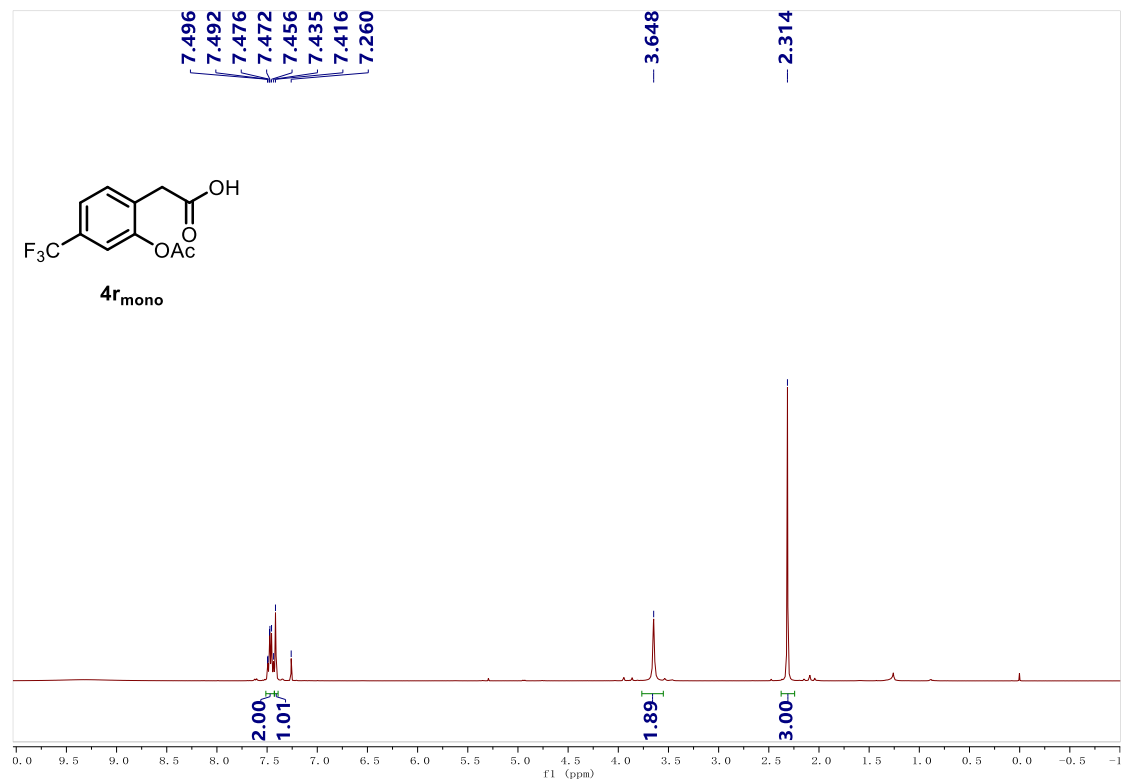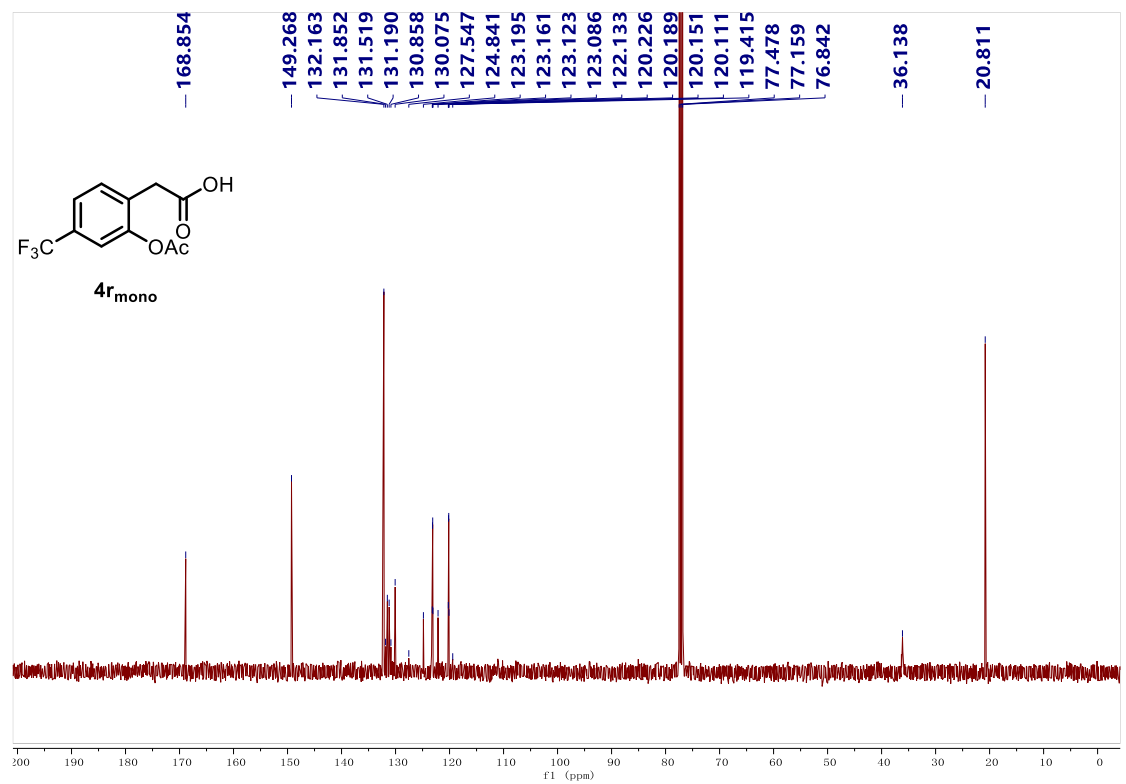

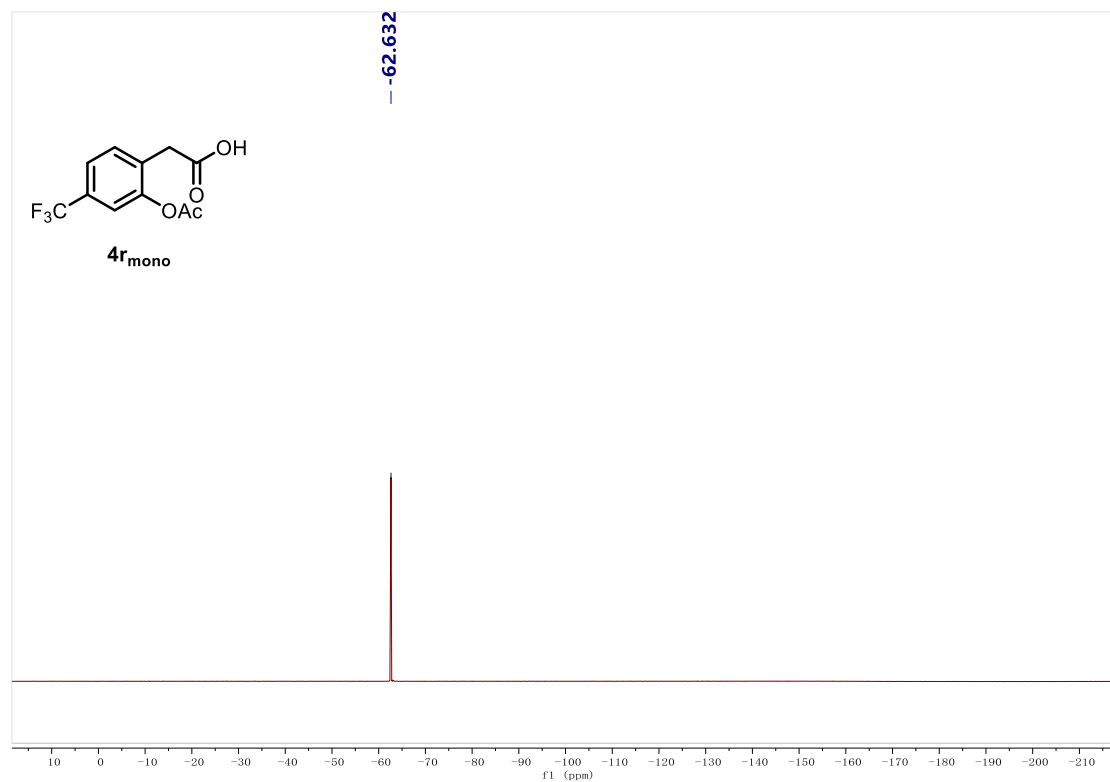

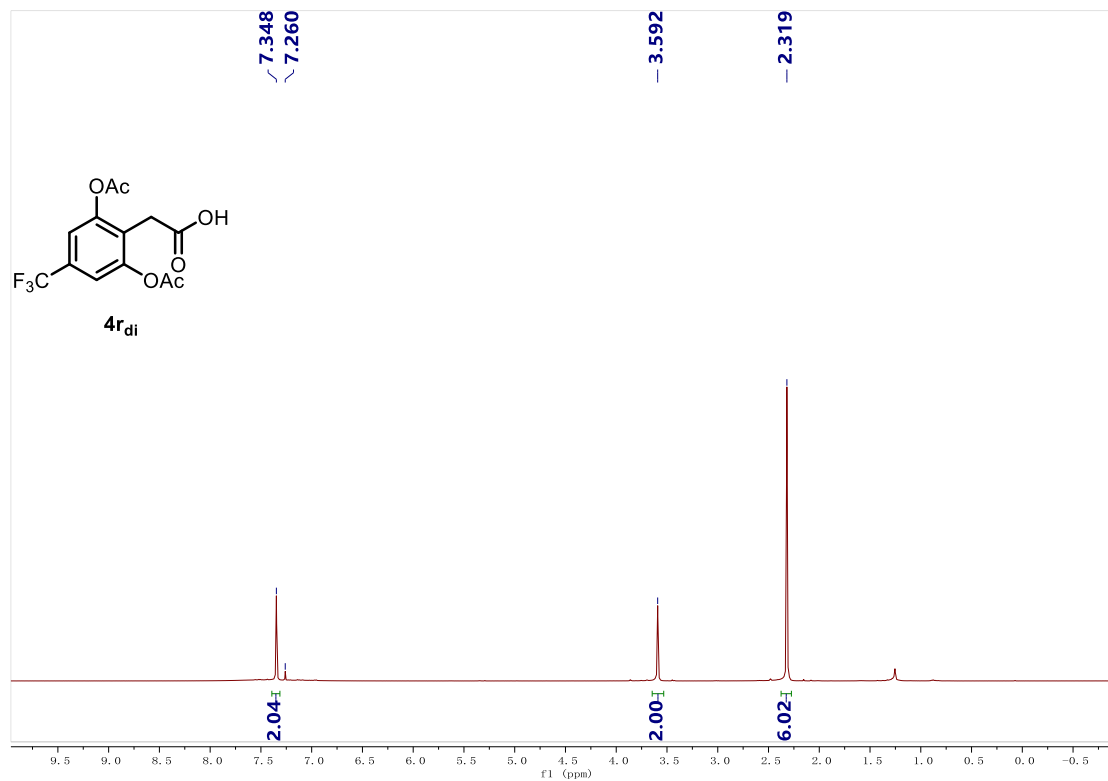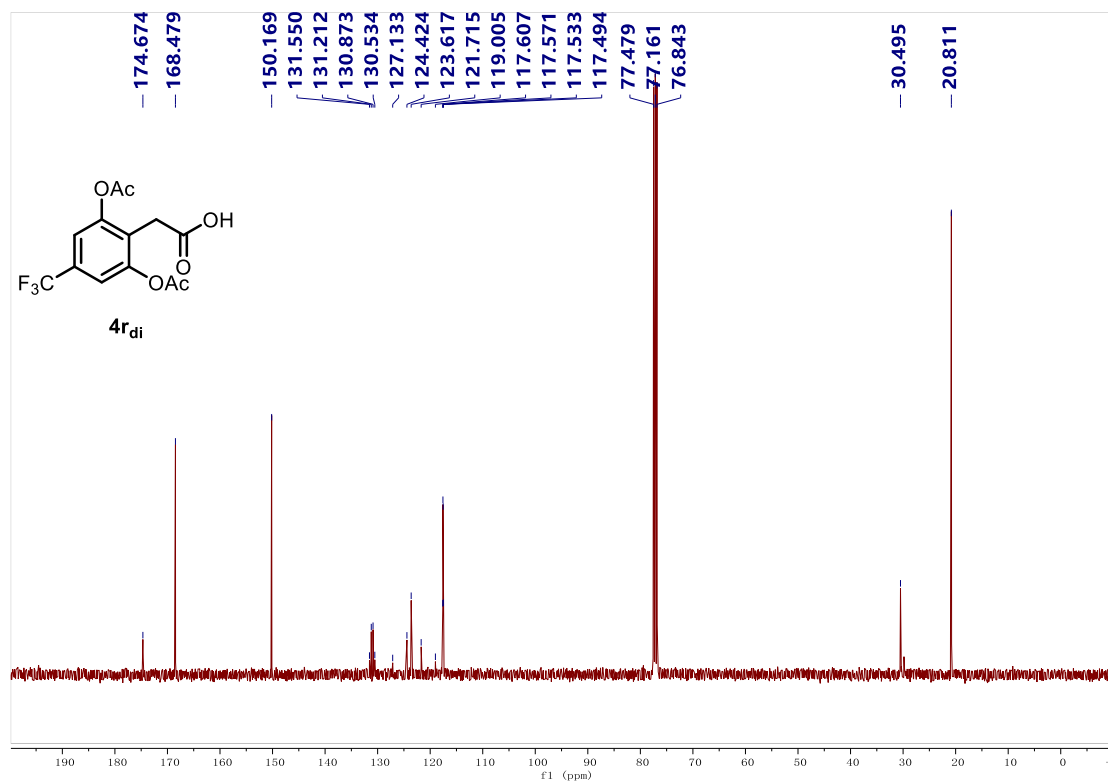

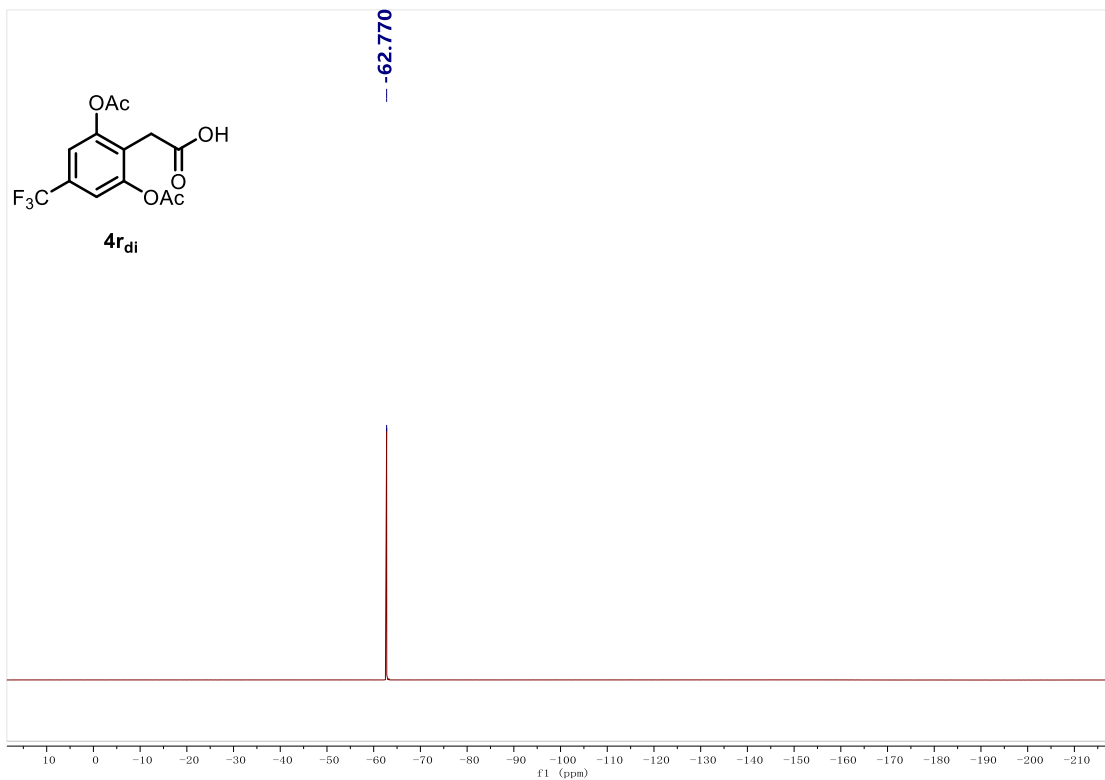

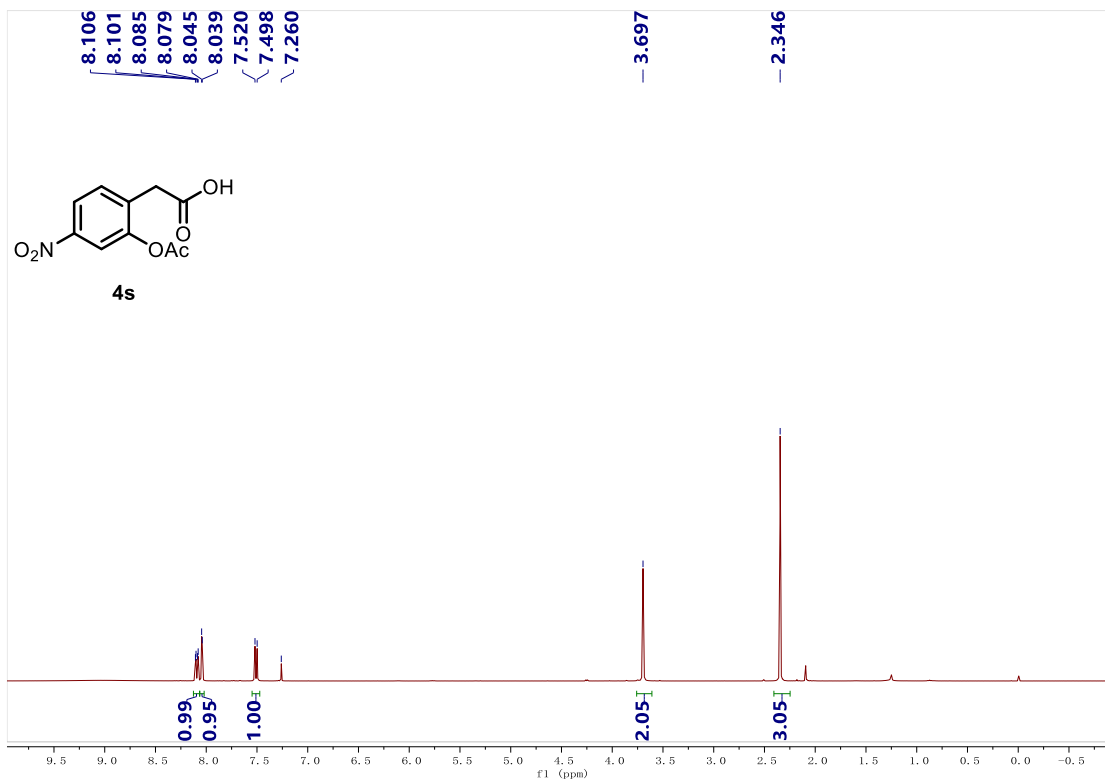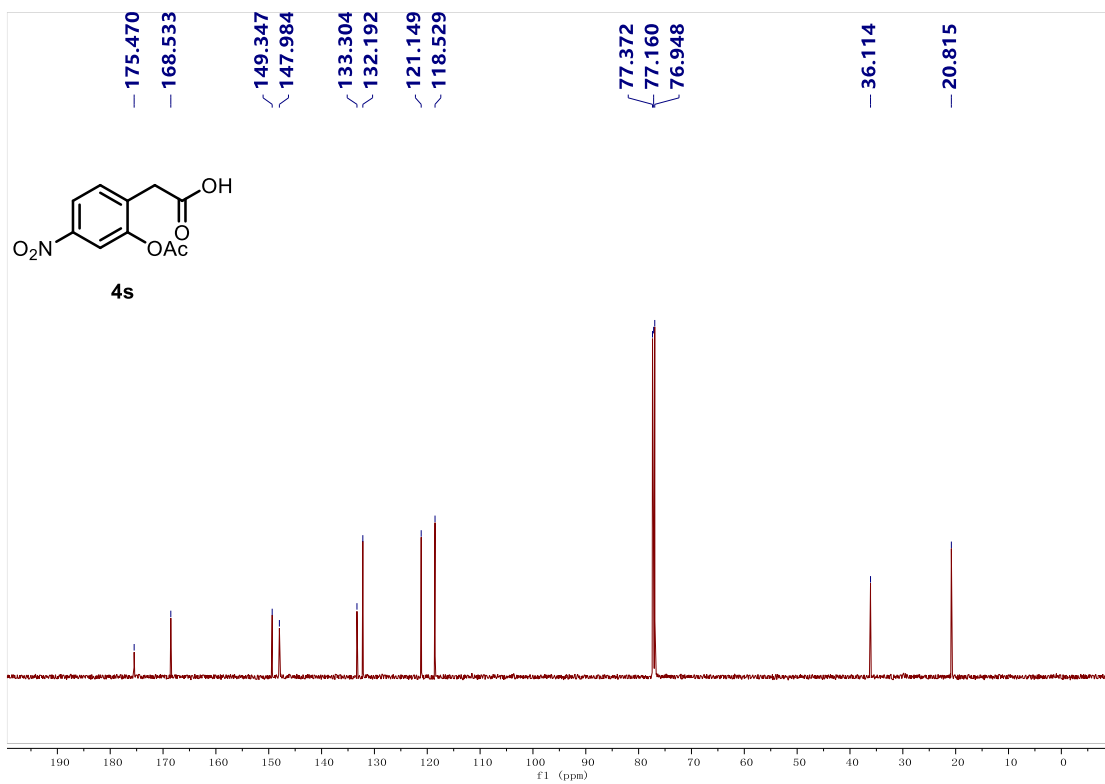



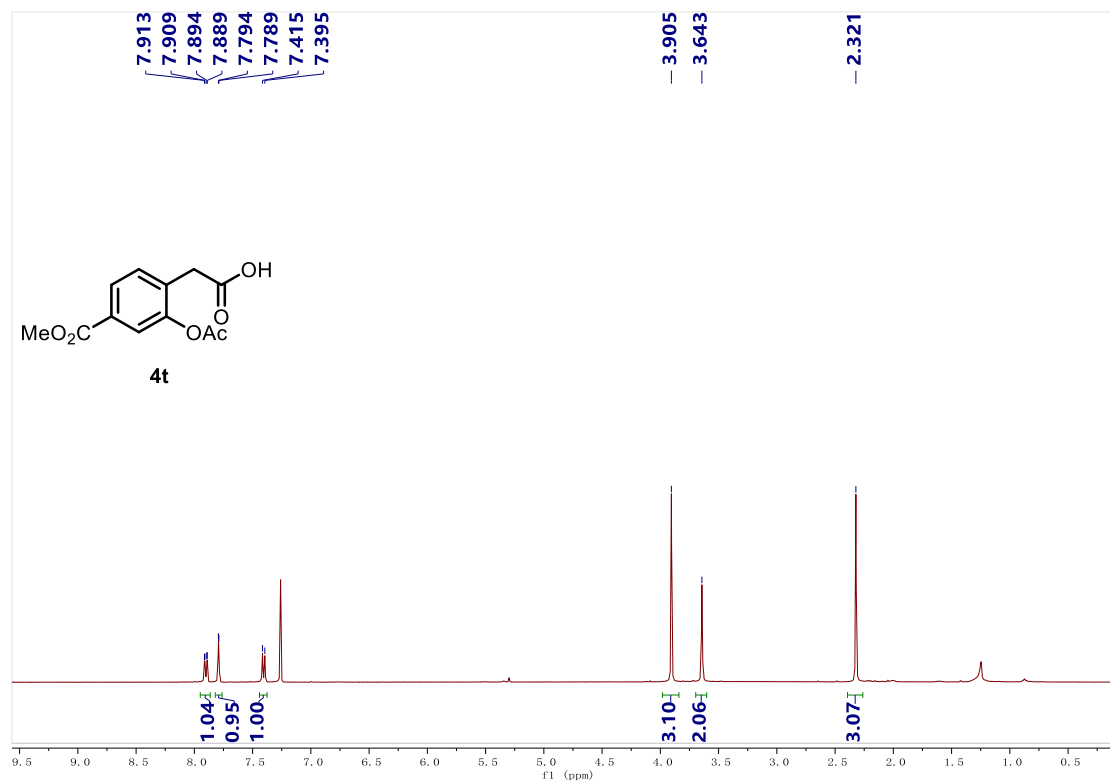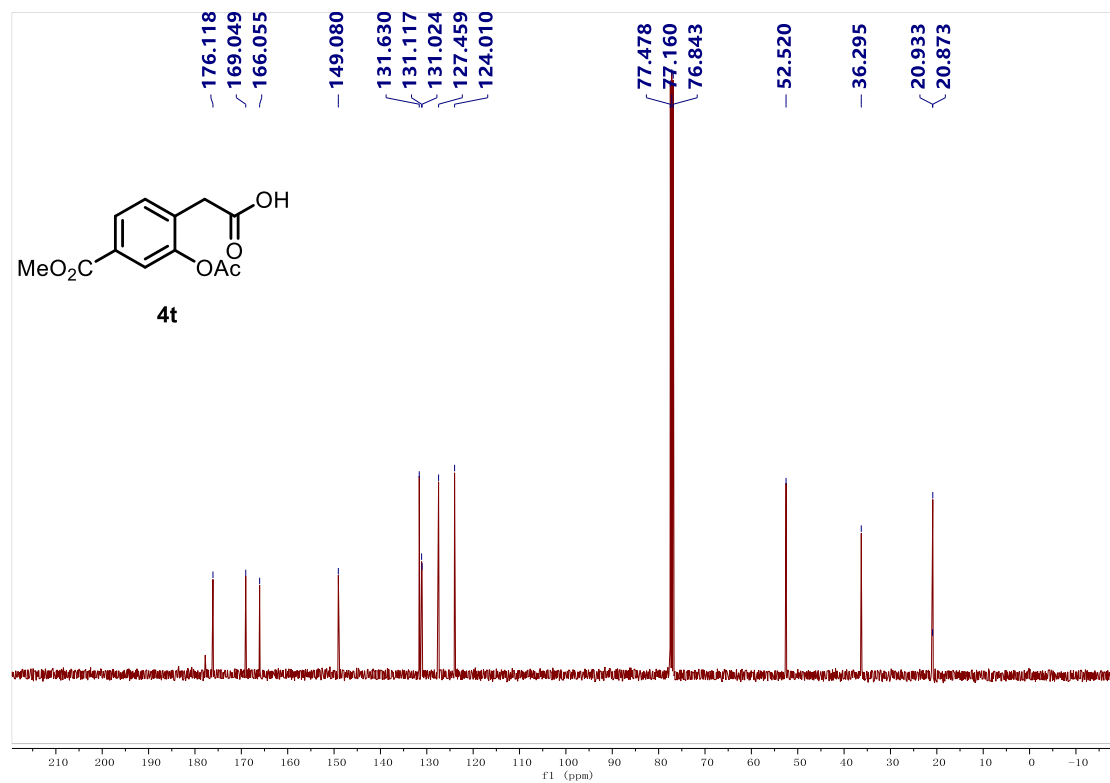

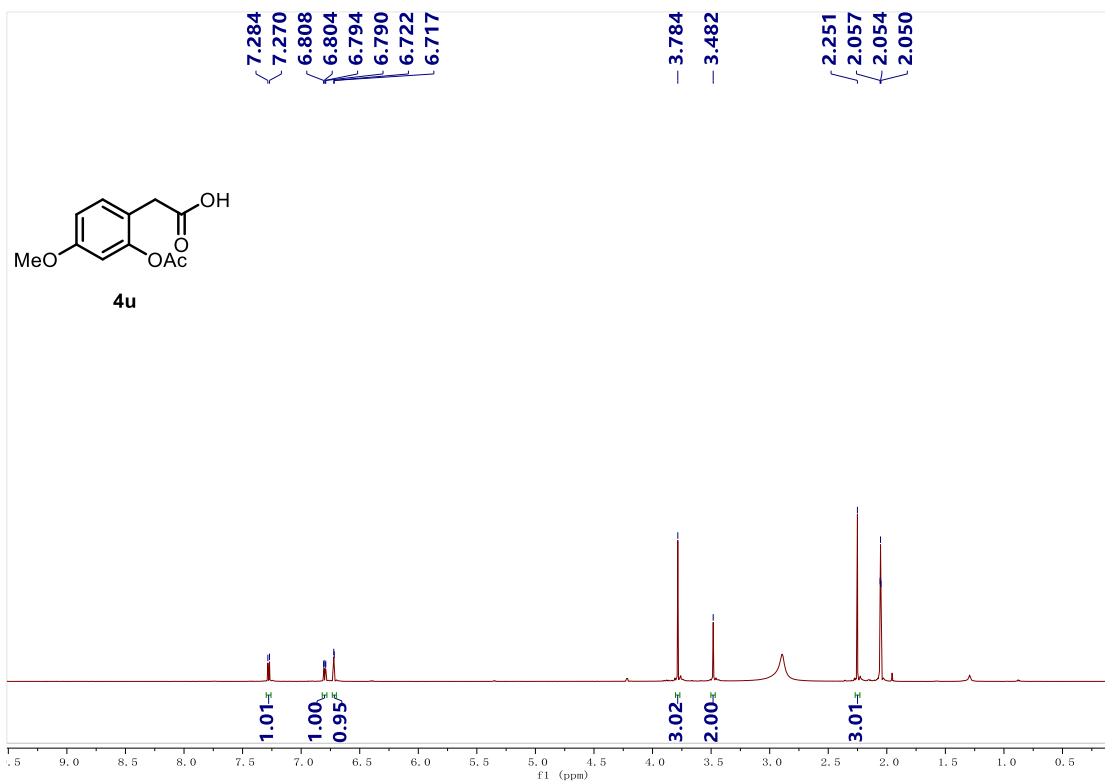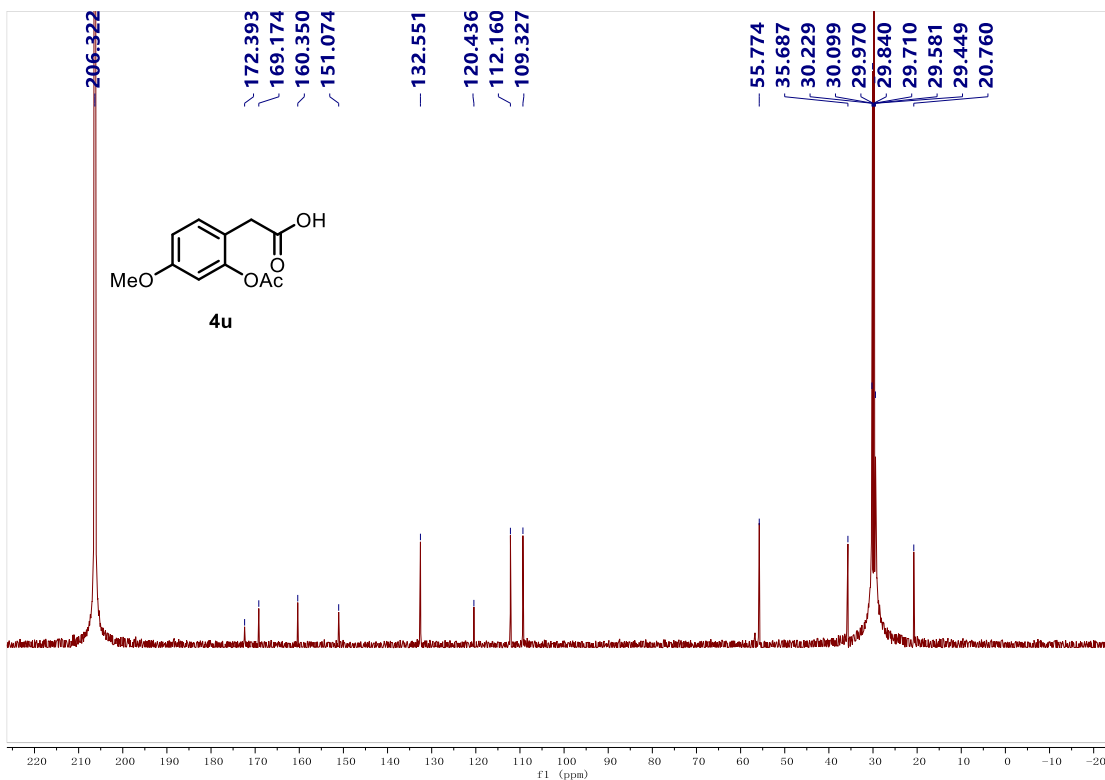

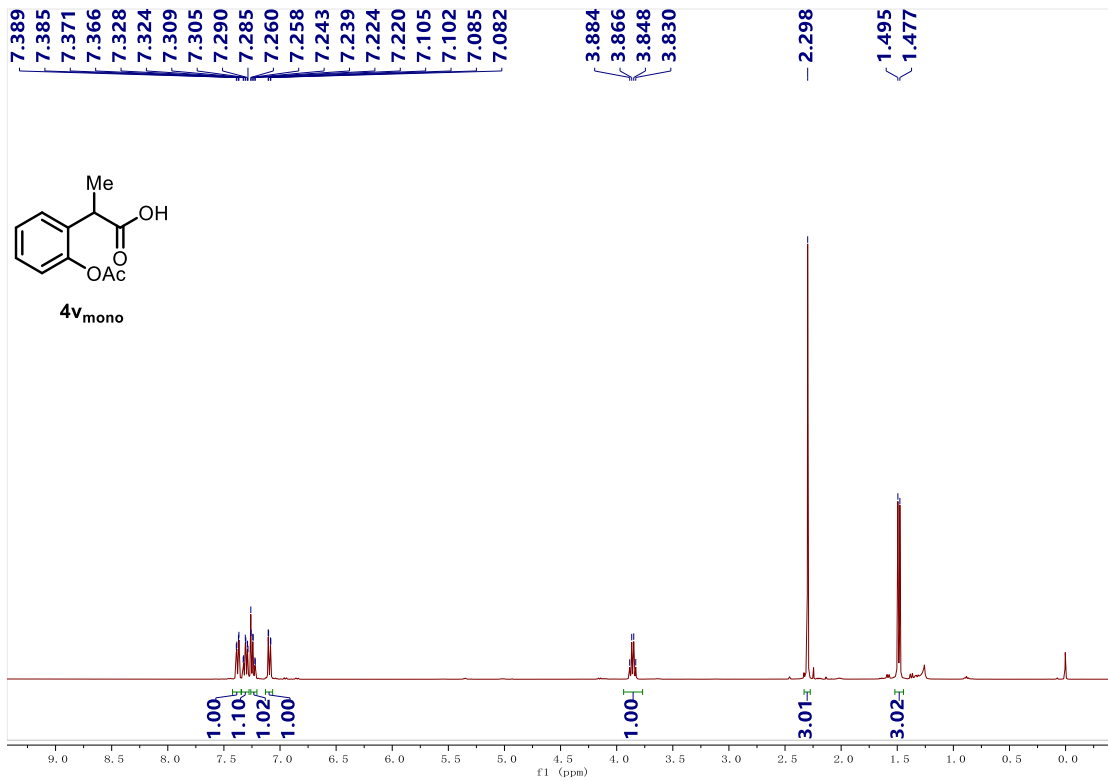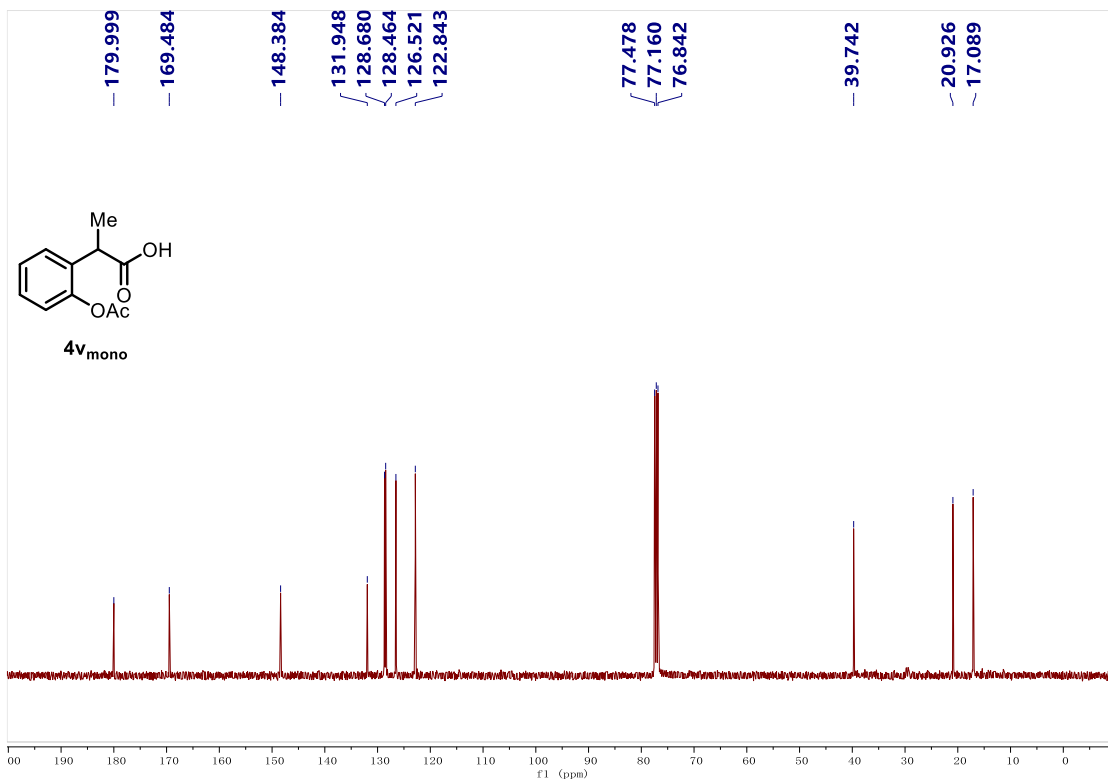

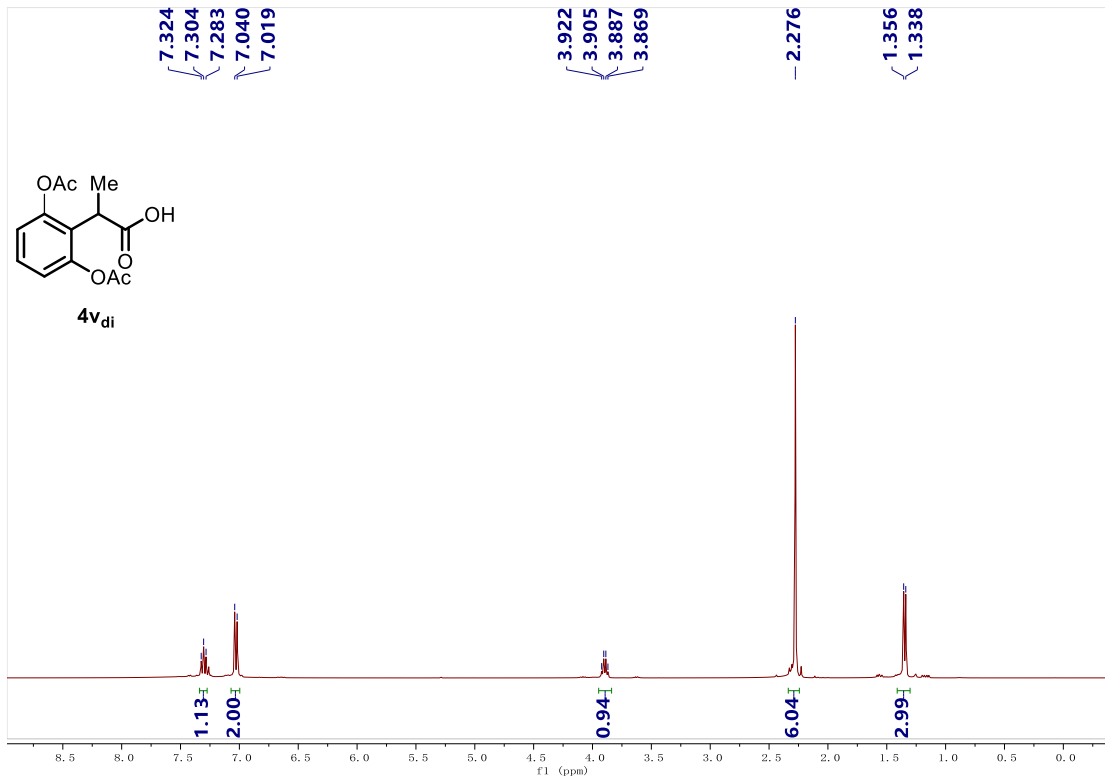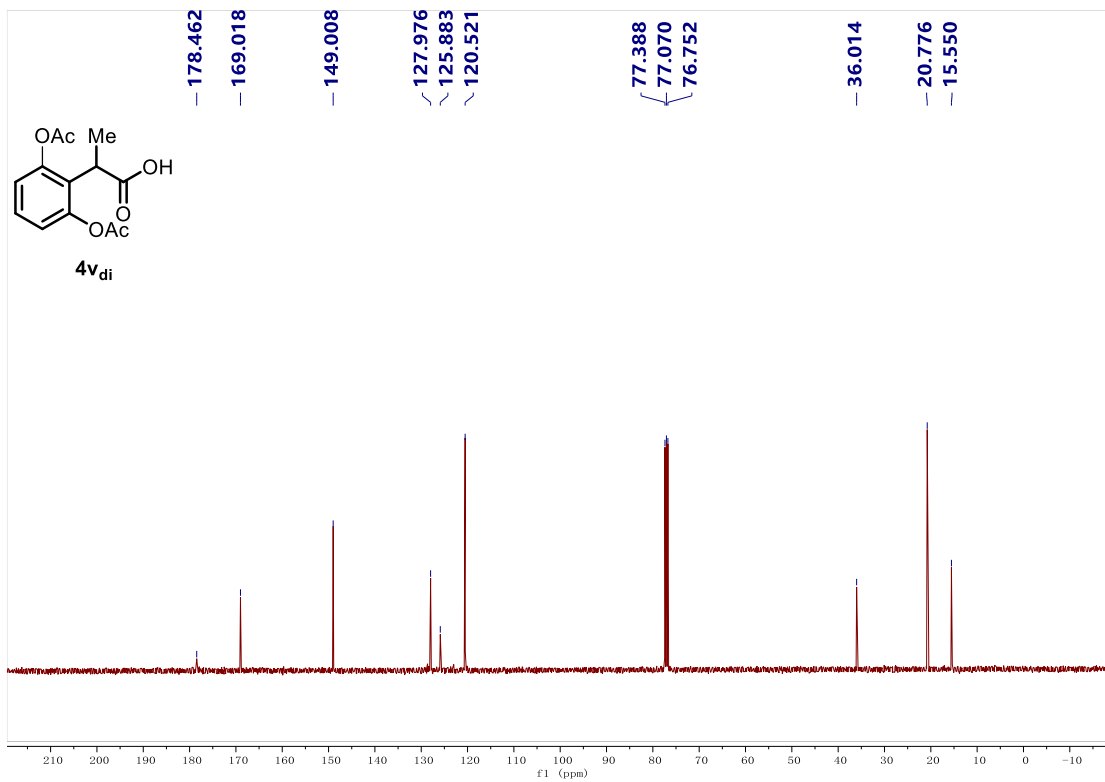

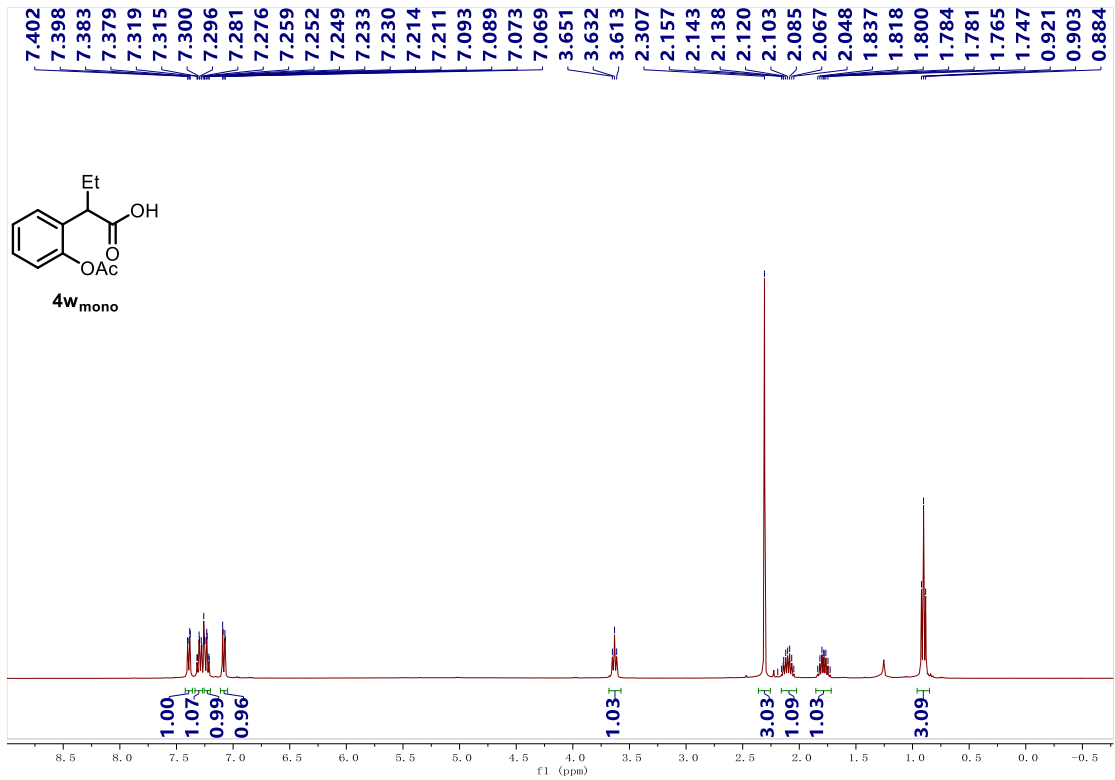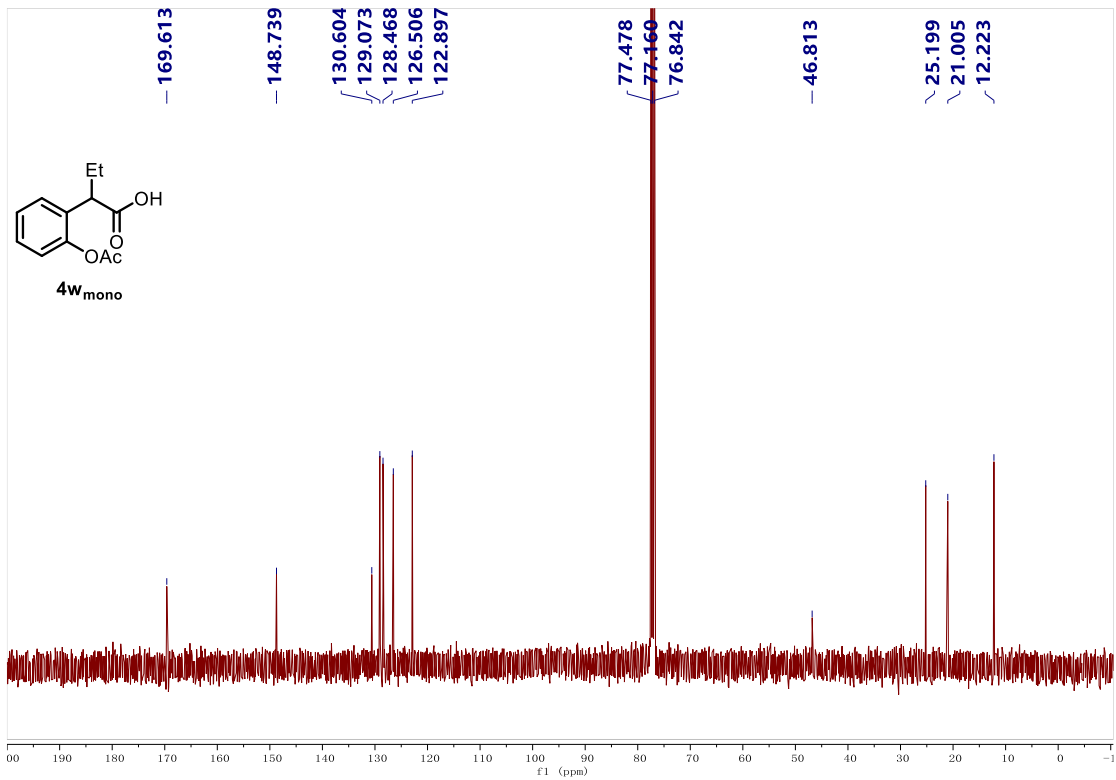

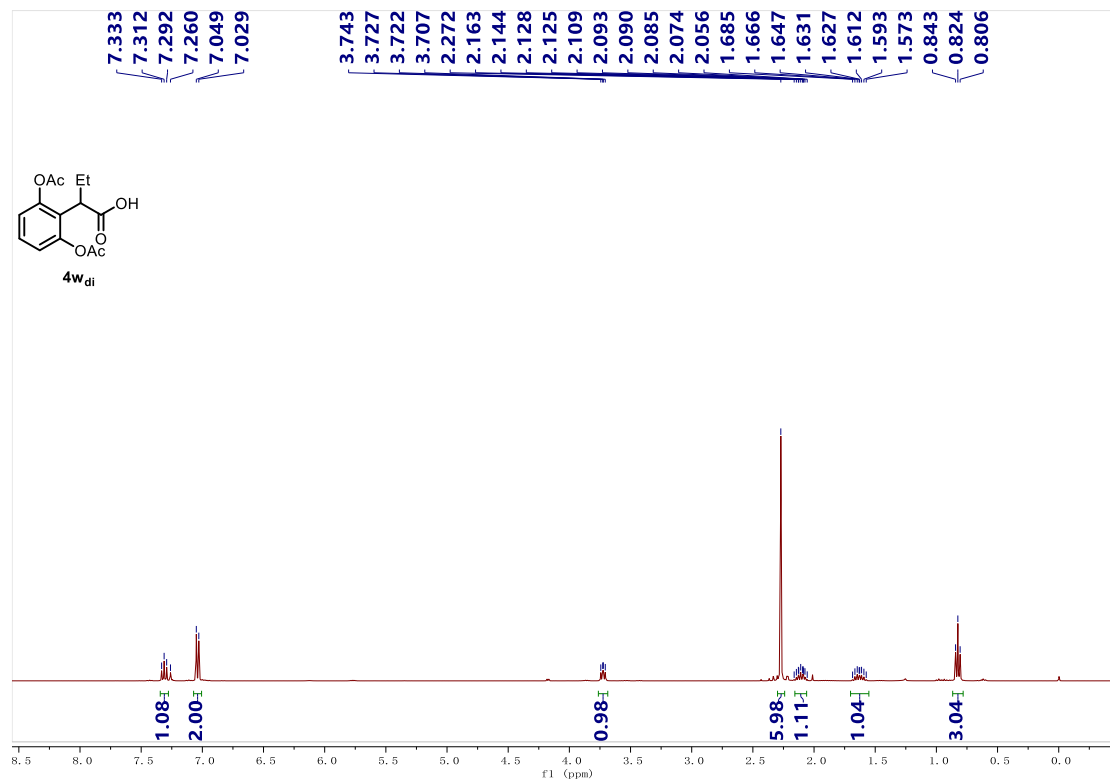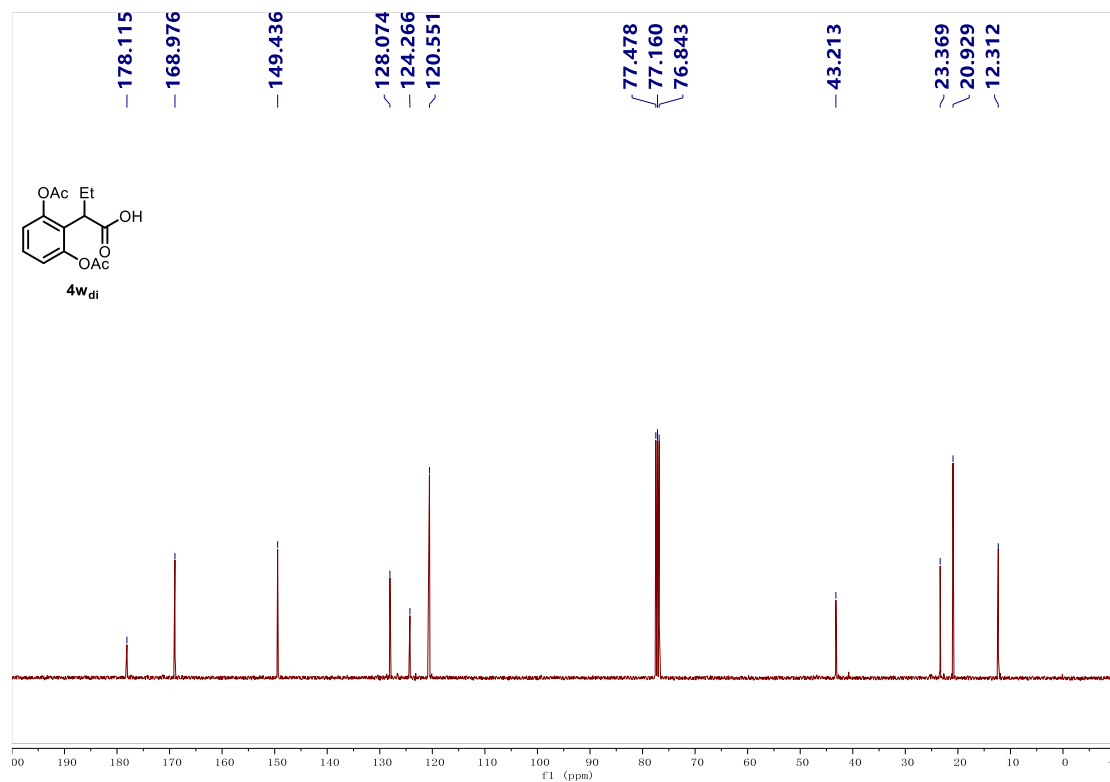

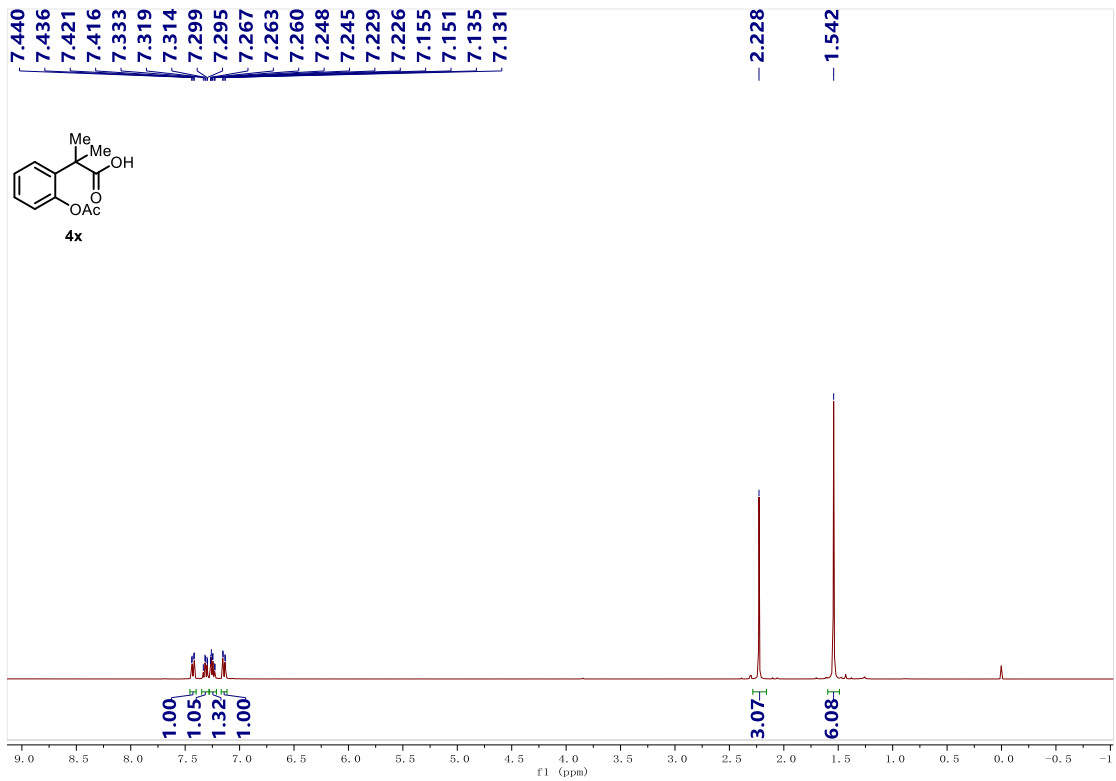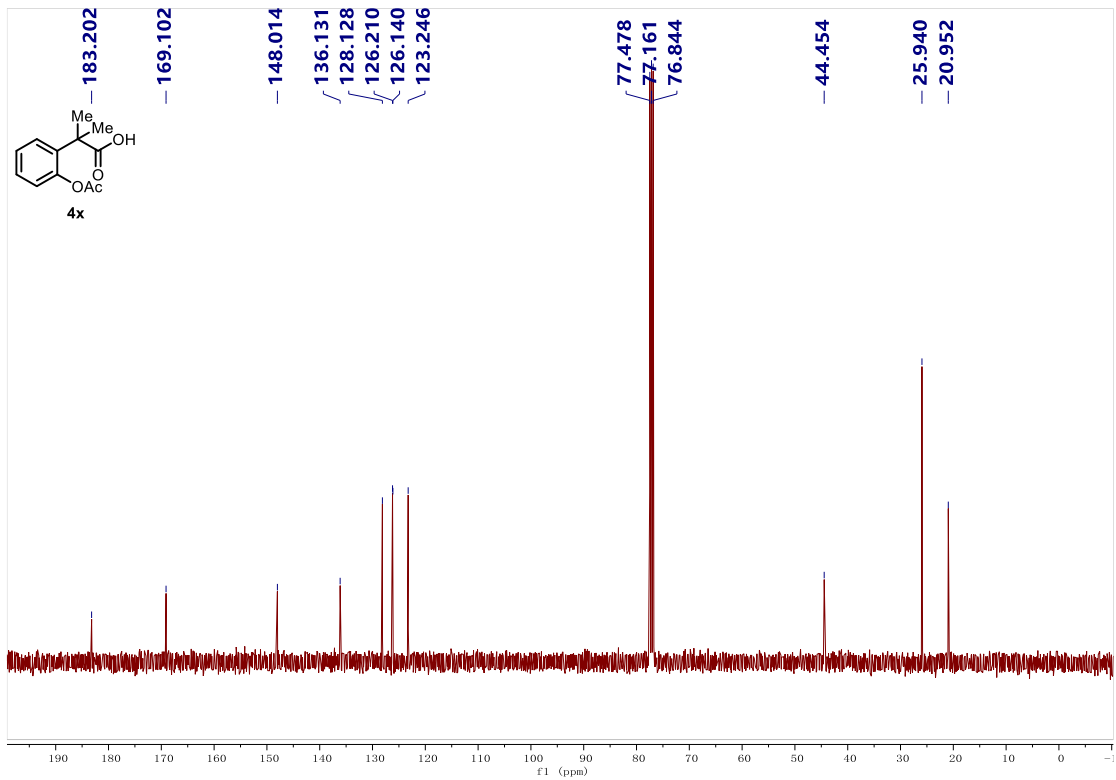

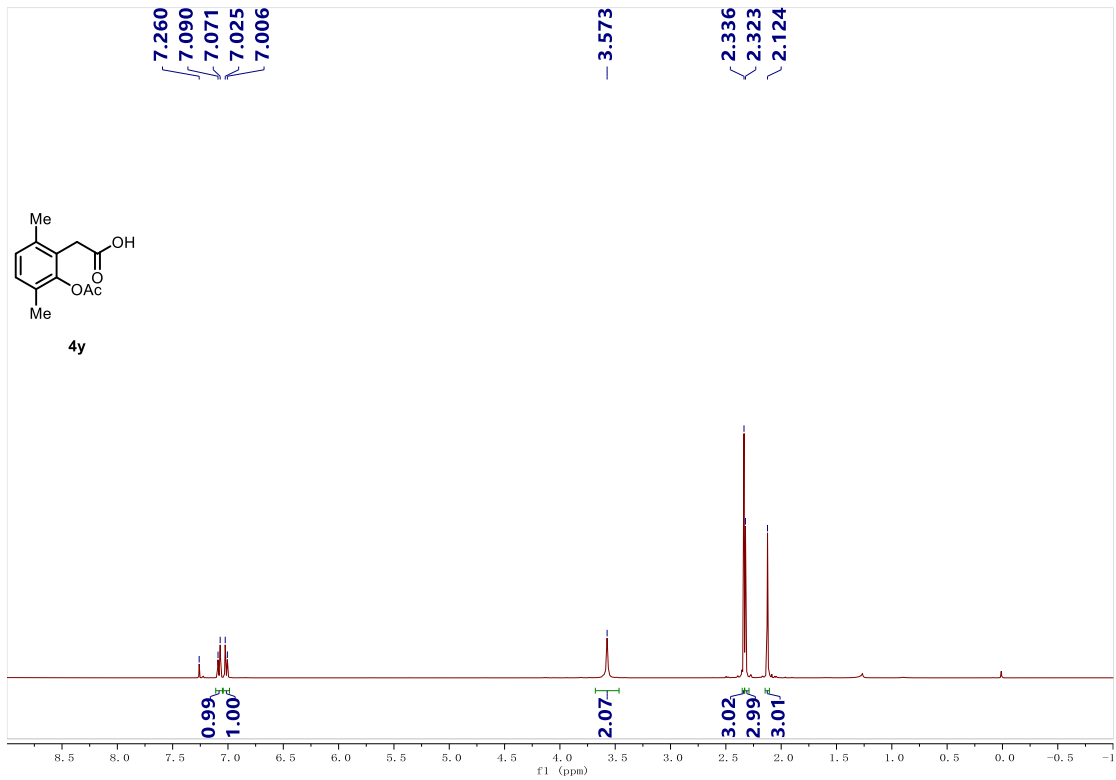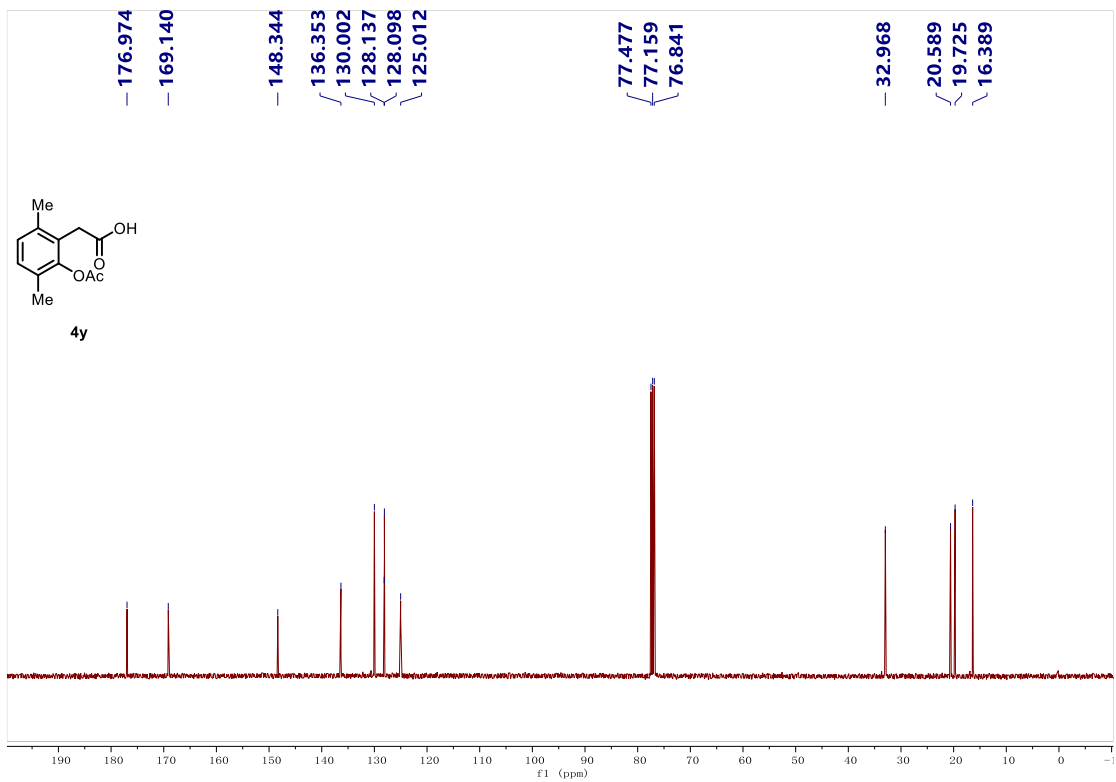



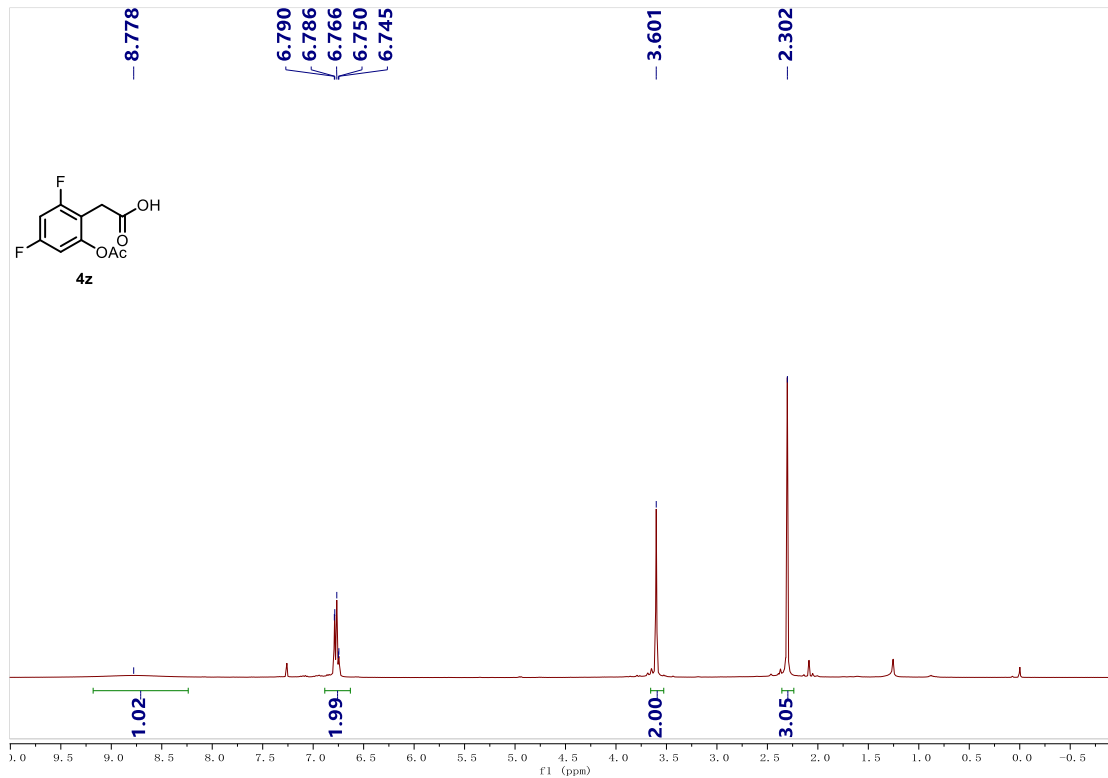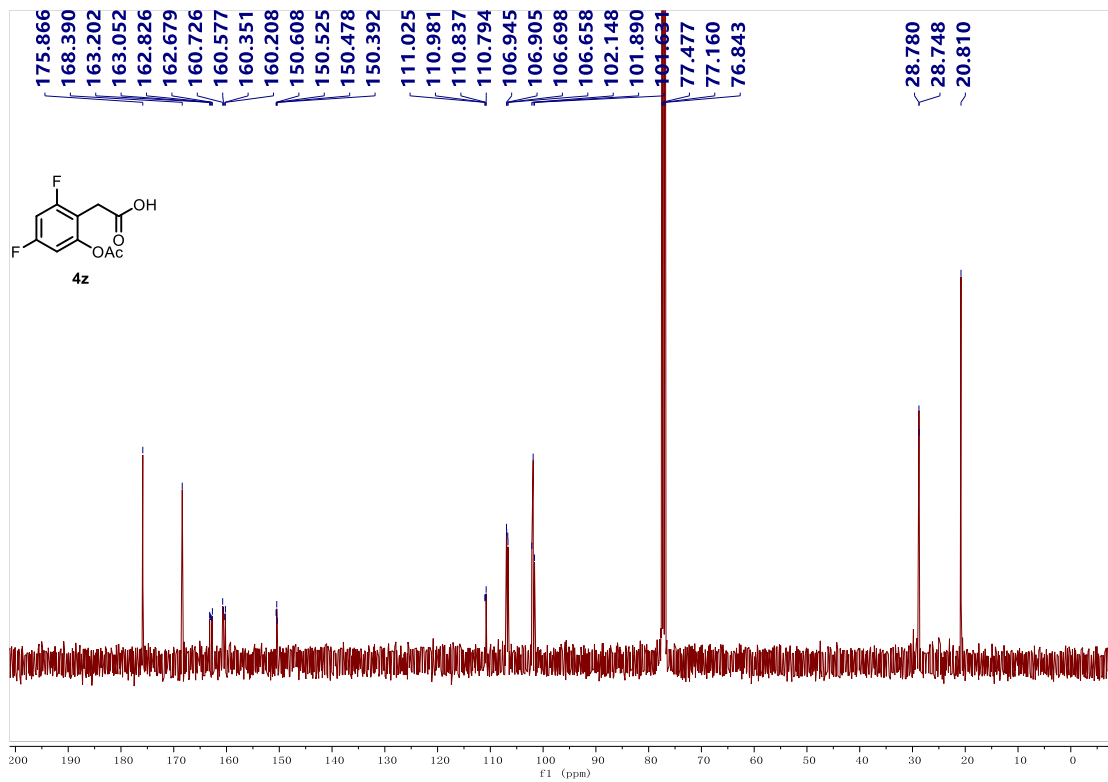

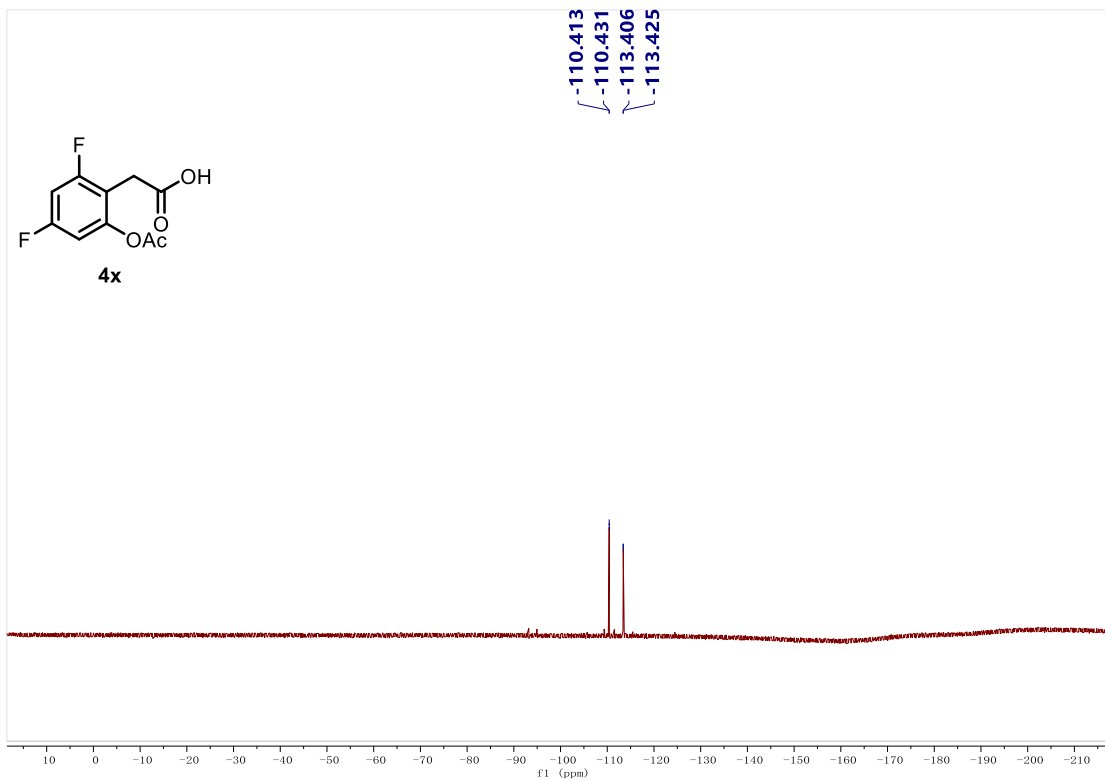

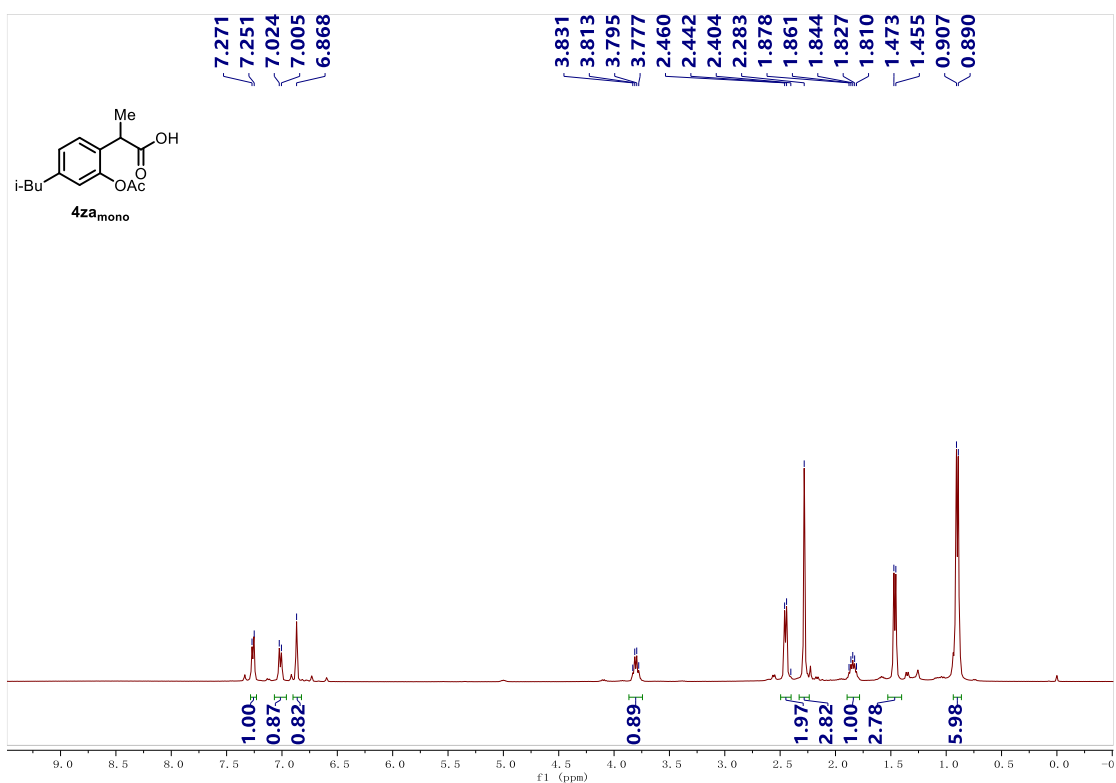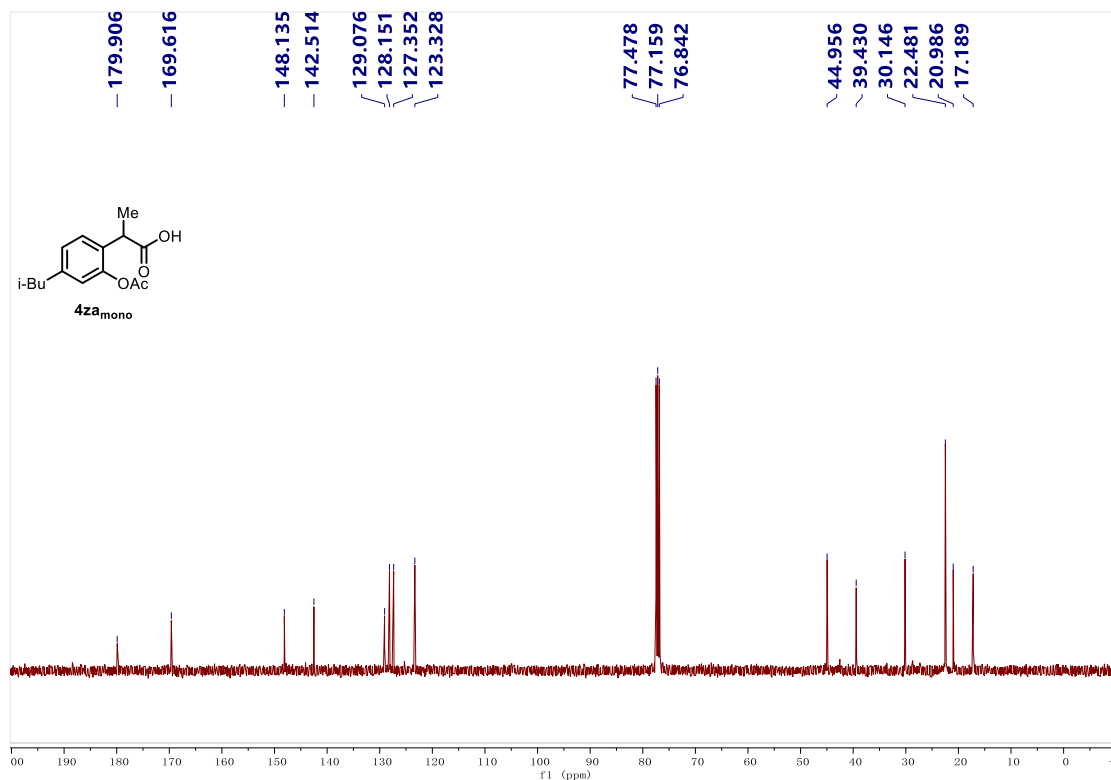

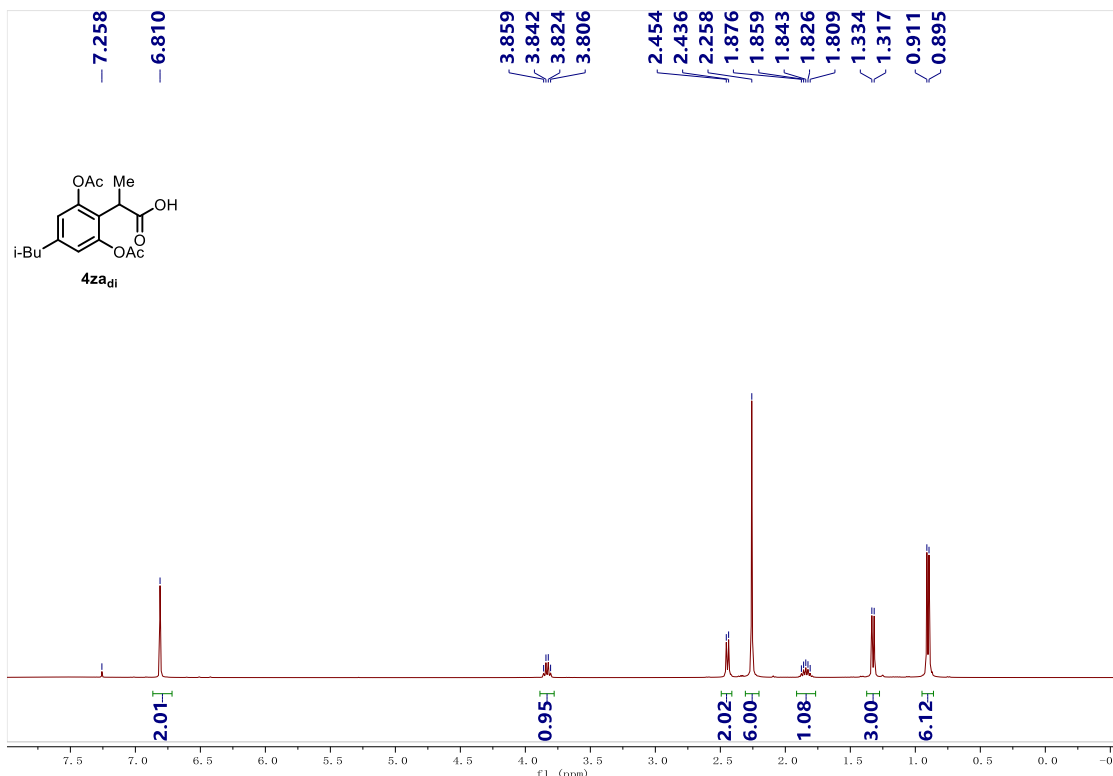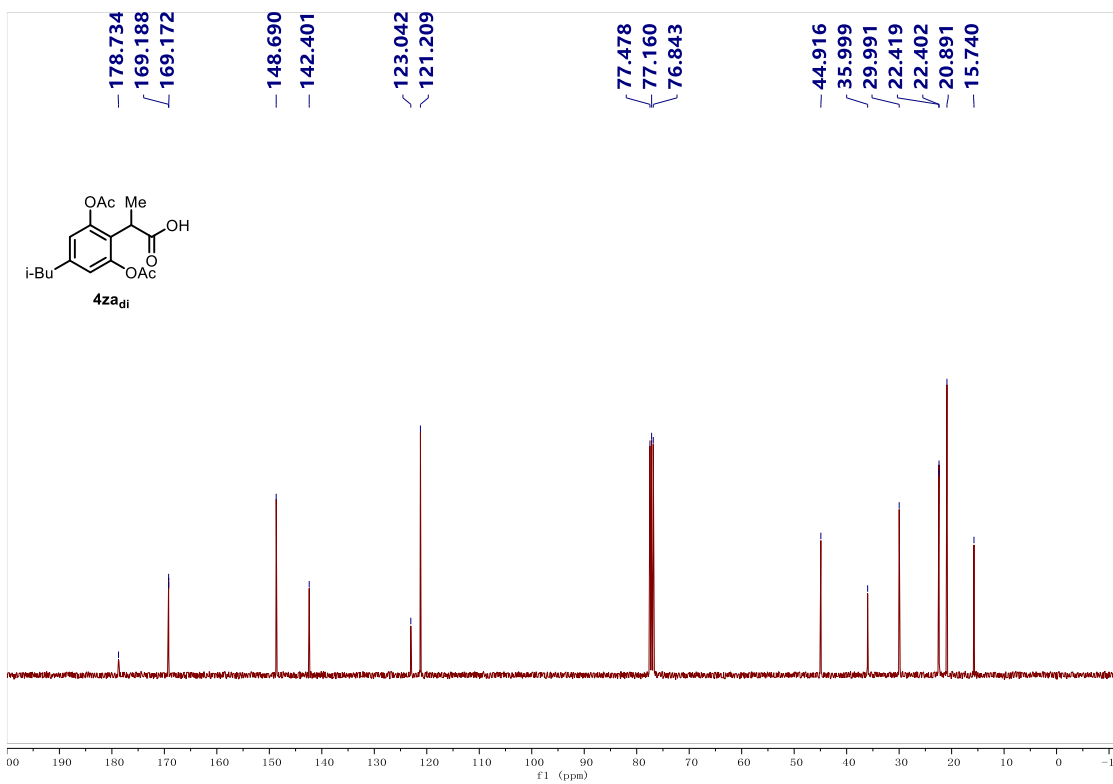

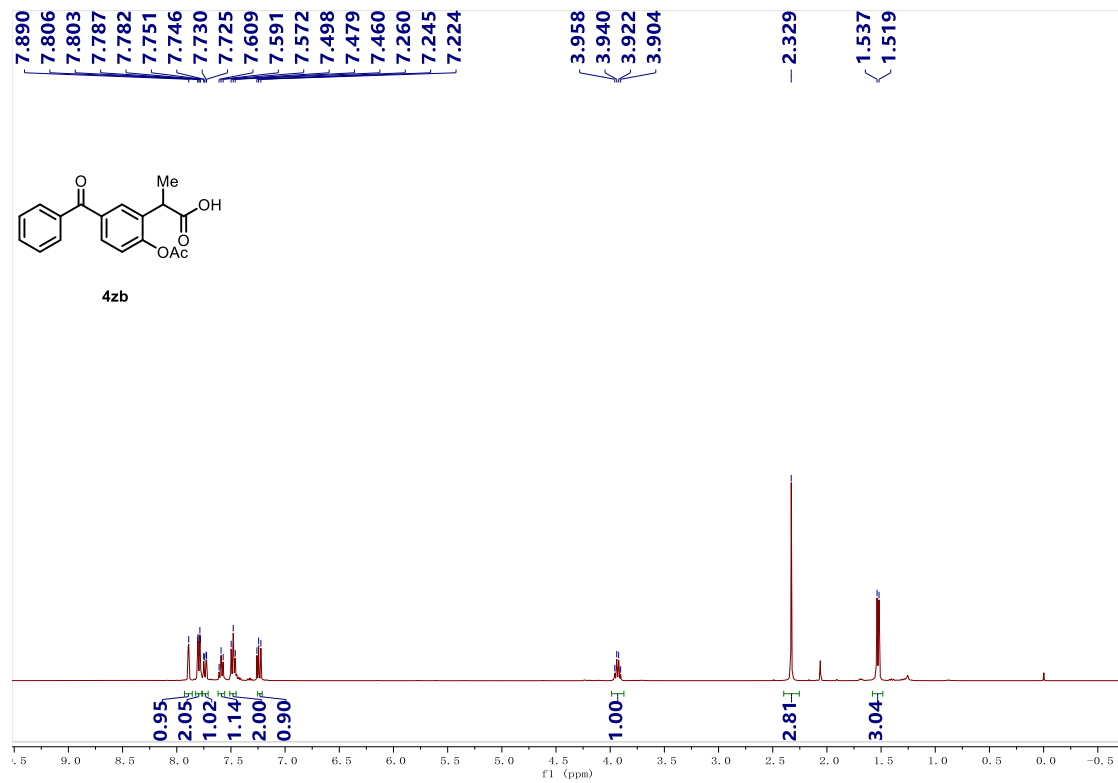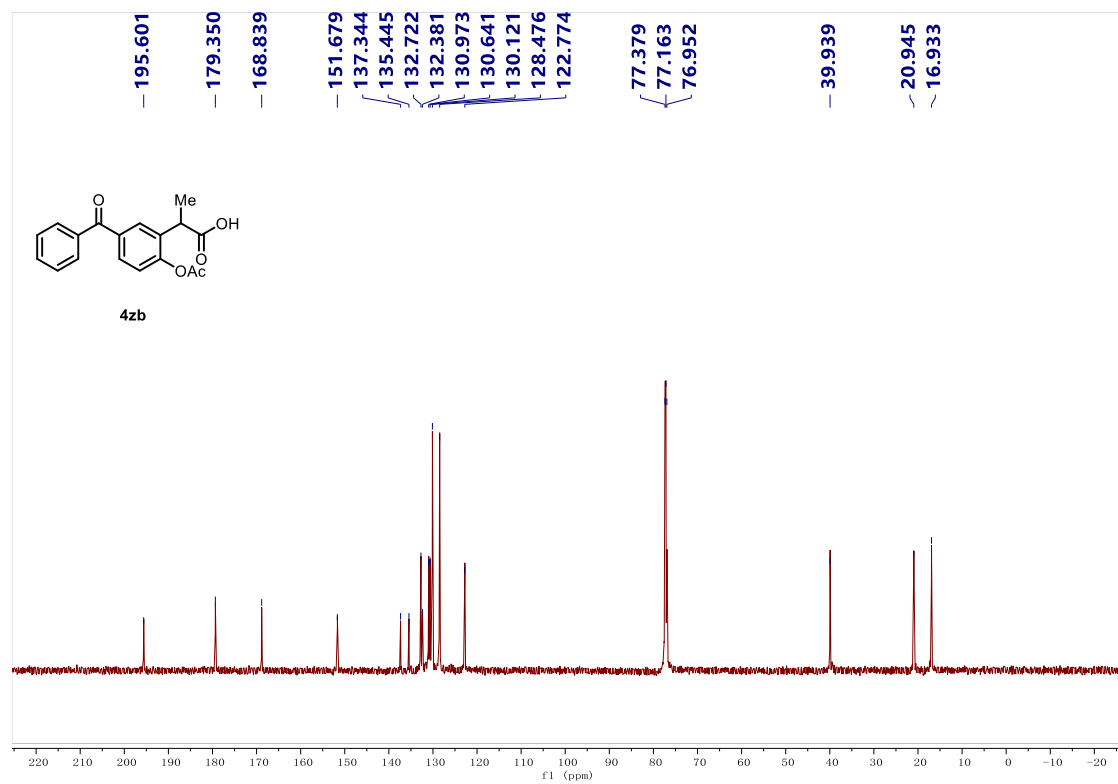

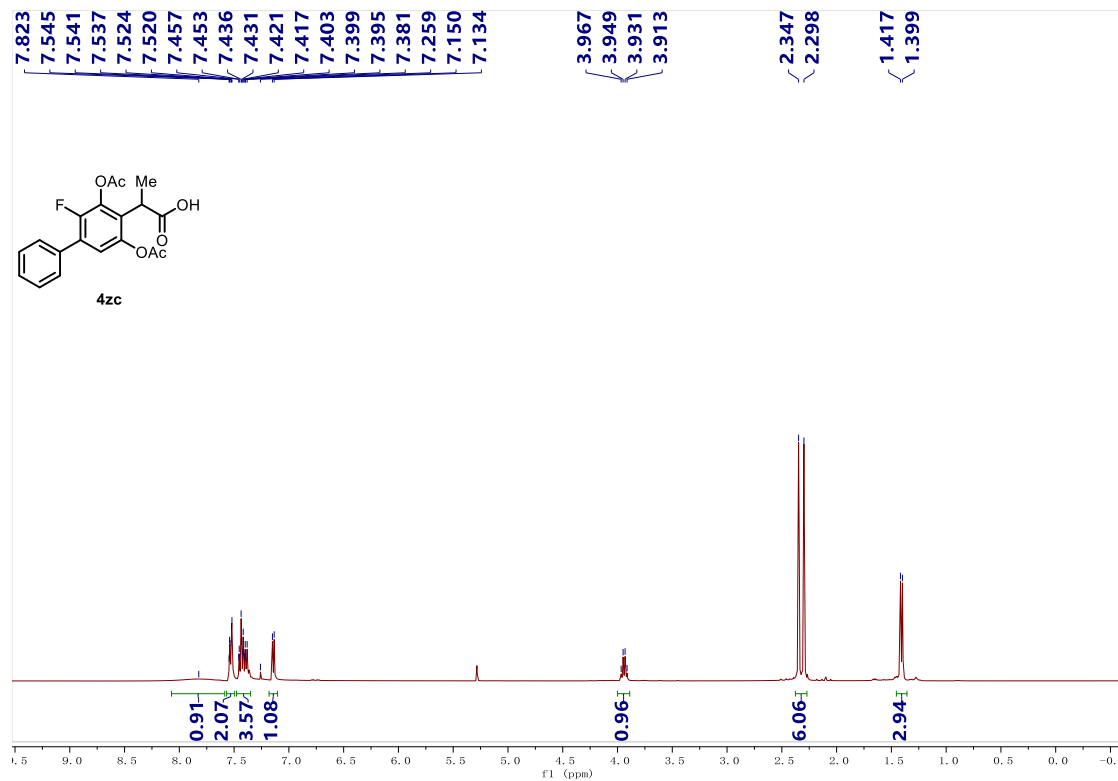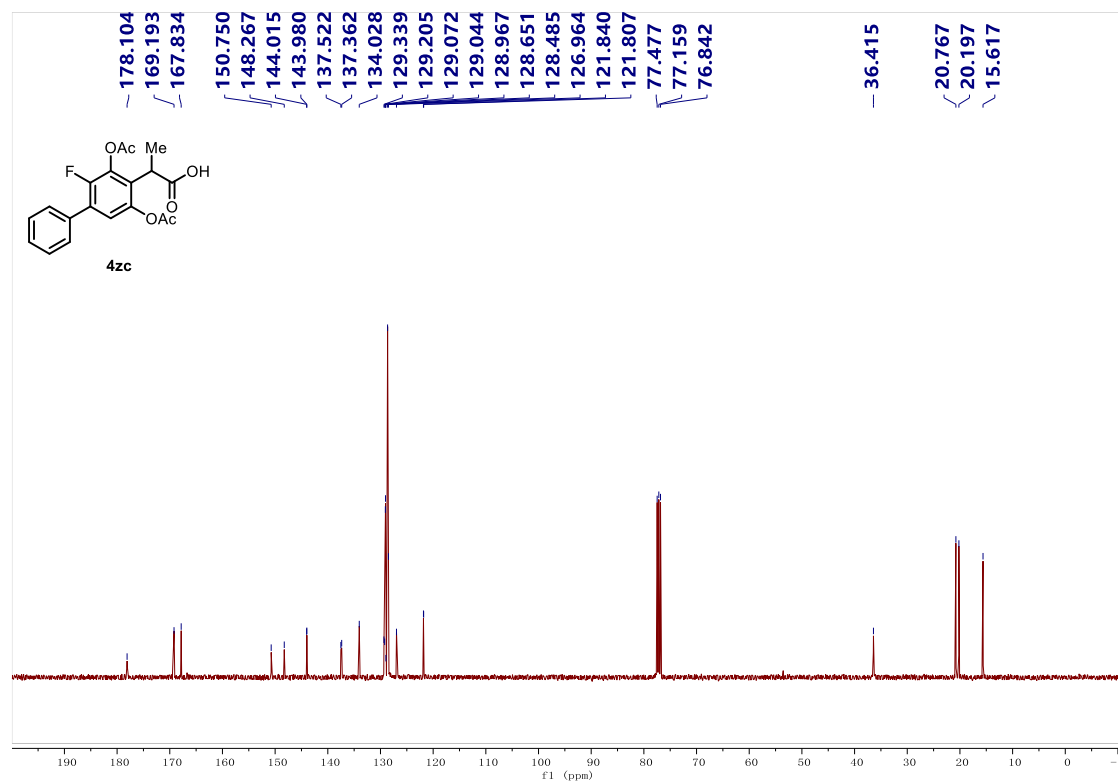

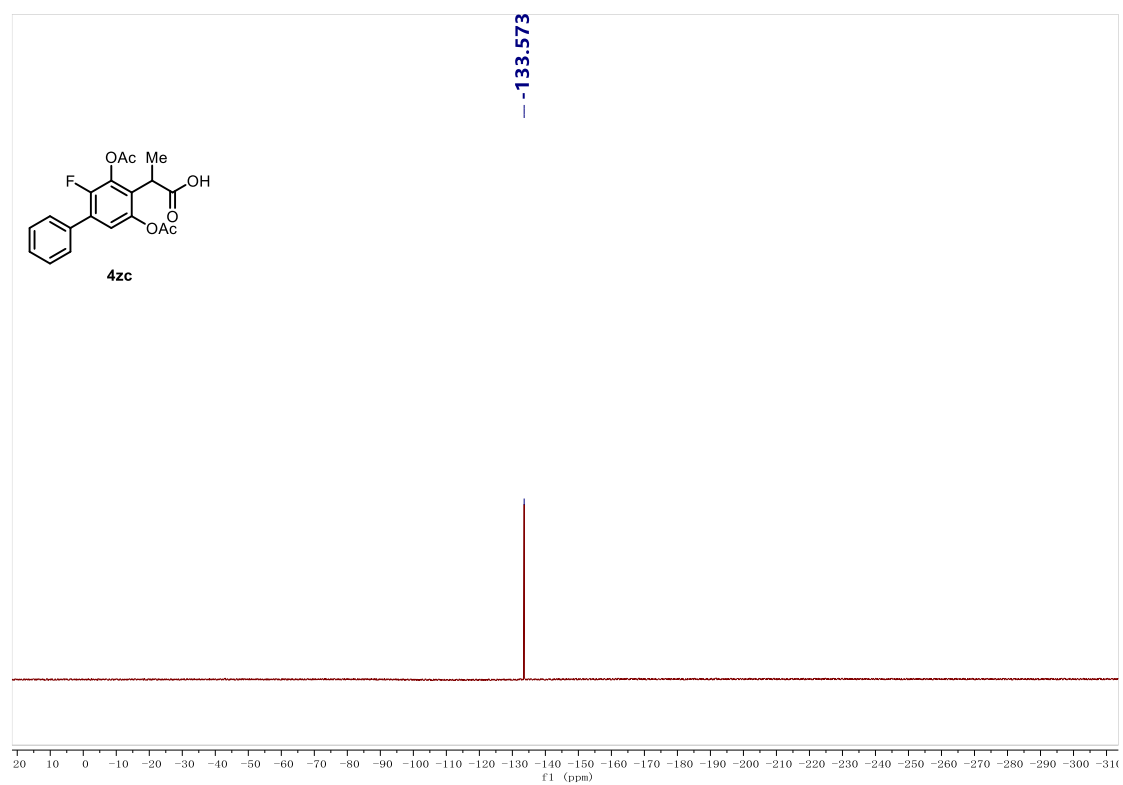

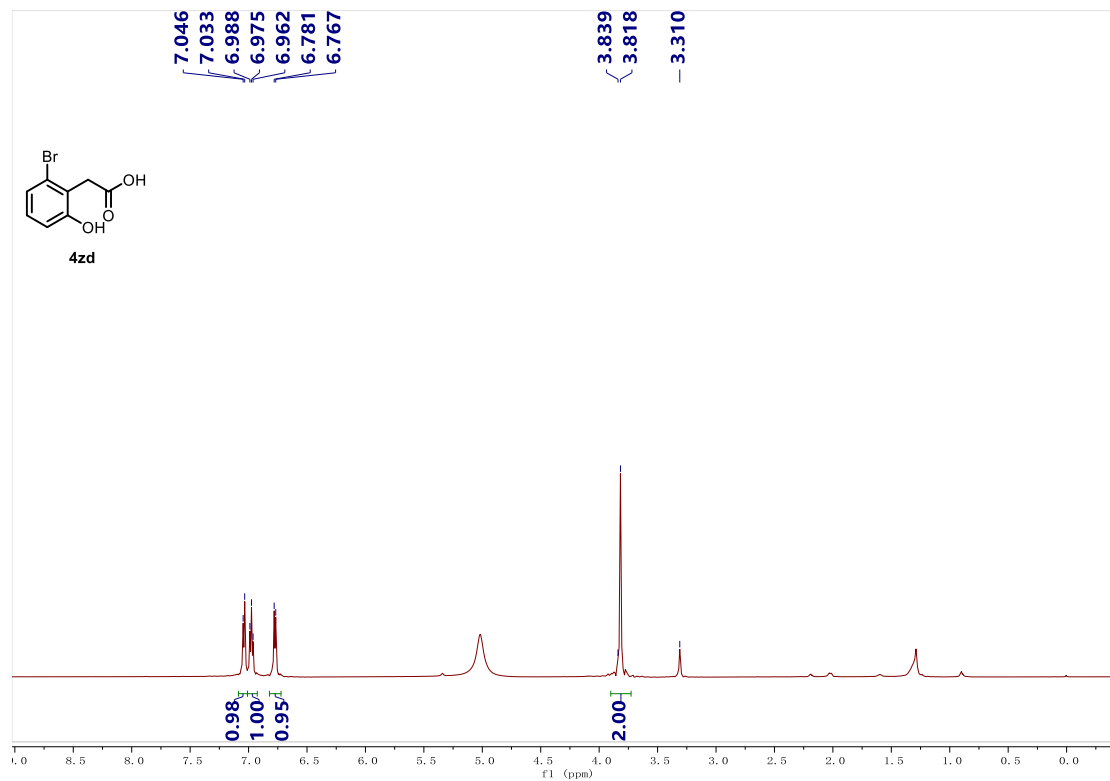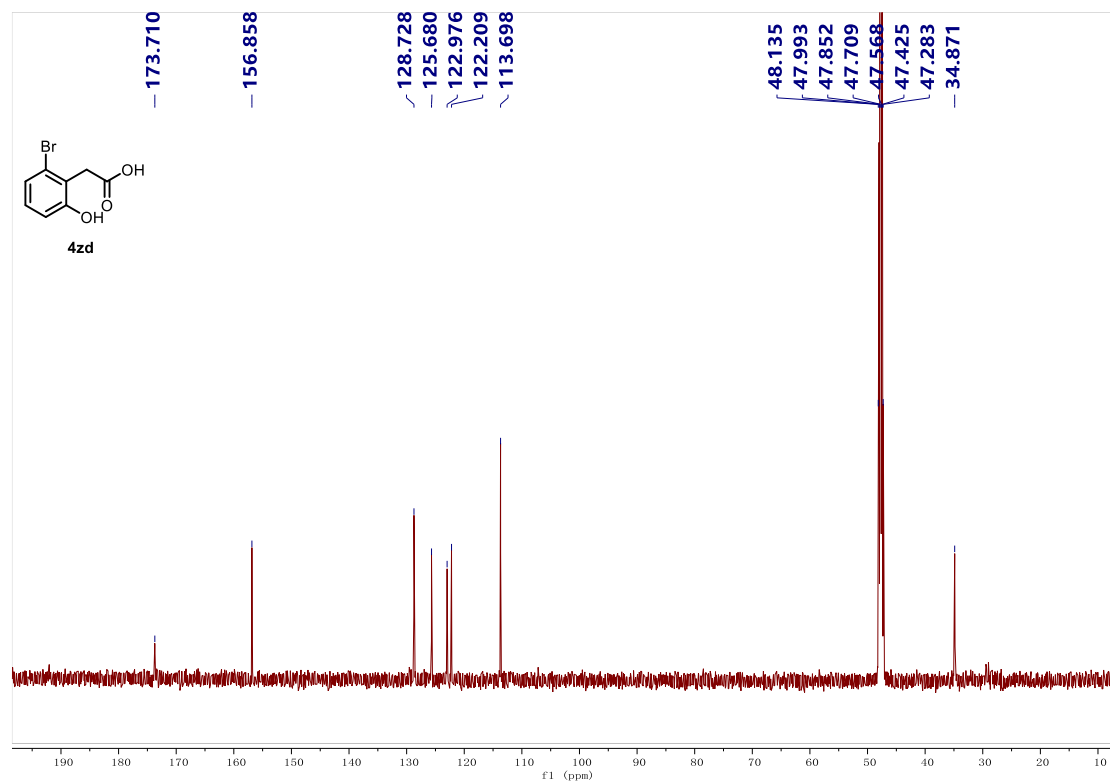



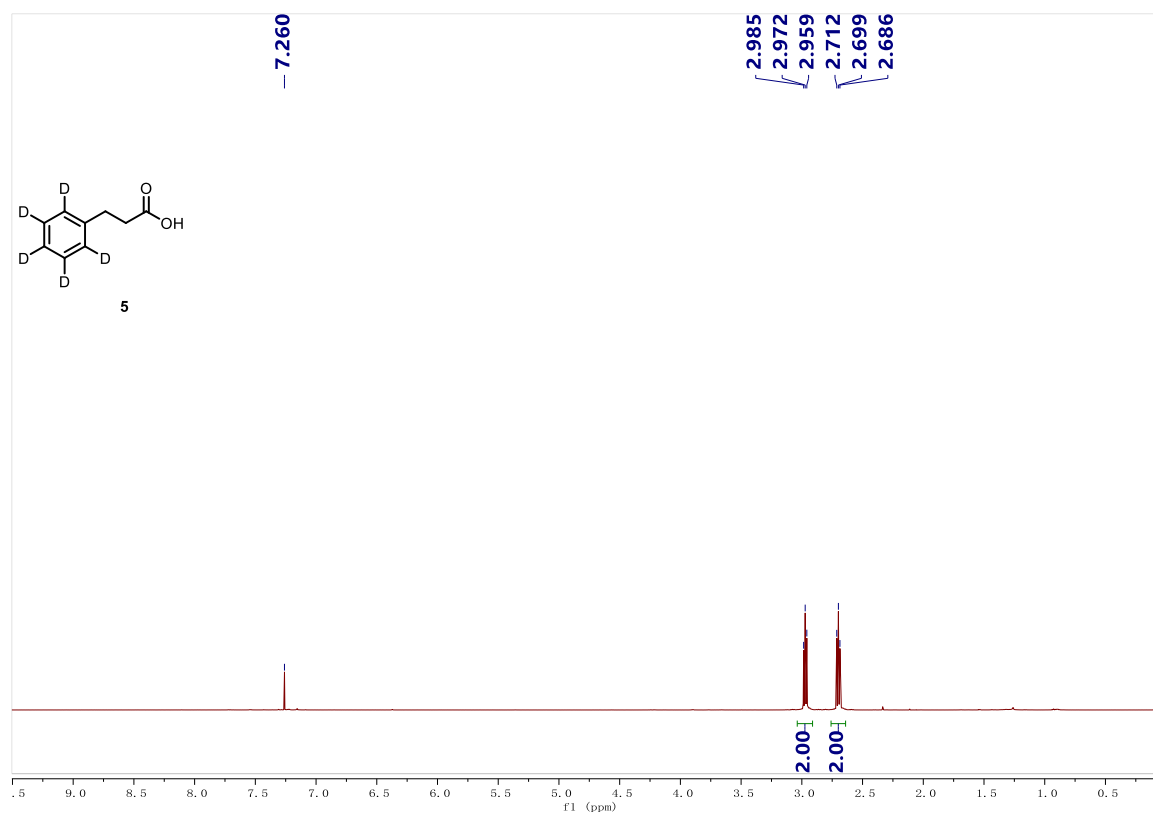

Supplement: d2cc00459c1.pdf [file d2cc00459c1.pdf]
